# Supplementary material for: Sleep Deprivation Potentiates Silica Nanoparticle-Induced Circadian Disruption and Lacrimal Gland Dysfunction in Mice
Source: Research Square preprint supplement (doi:10.21203/rs.3.rs-6562058/v1), 2025-05-09
Supplement: Supplementary file 1 [file 07a8f9df65e127dd3ba12ee1.xlsx]

## Sheet: Sheet1
Table S16 The top10 KEGG pathways for neuro-related transcripts in ELGs.
KEGG Pathway Term ID	KEGG Pathway Term Desc	KEGG Pathway Term Level1	KEGG Pathway Term Level2	Term Candidate Gene Num	Total Candidate Gene Num	Term Gene Num	Total Gene Num	Rich Ratio	P value	Q value
4024	cAMP signaling pathway	Environmental Information Processing	Signal transduction	7	66	220	8767	0.0318182	0.00126173	0.140009
4080	Neuroactive ligand-receptor interaction	Environmental Information Processing	Signaling molecules and interaction	9	66	376	8767	0.0239362	0.00189206	0.140009
4360	Axon guidance	Organismal Systems	Development and regeneration	6	66	181	8767	0.0331492	0.0023206	0.140009
4514	Cell adhesion molecules	Environmental Information Processing	Signaling molecules and interaction	5	66	171	8767	0.0292398	0.0091251	0.247395
4022	cGMP-PKG signaling pathway	Environmental Information Processing	Signal transduction	5	66	173	8767	0.0289017	0.00956777	0.247395
4971	Gastric acid secretion	Organismal Systems	Digestive system	3	66	75	8767	0.04	0.0187226	0.423599
4020	Calcium signaling pathway	Environmental Information Processing	Signal transduction	5	66	240	8767	0.0208333	0.0341032	0.437337
250	Alanine, aspartate and glutamate metabolism	Metabolism	Amino acid metabolism	2	66	39	8767	0.0512821	0.0345915	0.437337
4713	Circadian entrainment	Organismal Systems	Environmental adaptation	3	66	98	8767	0.0306122	0.0373547	0.437337
4925	Aldosterone synthesis and secretion	Organismal Systems	Endocrine system	3	66	102	8767	0.0294118	0.0412931	0.437337
