# Supplementary material for: Sleep Deprivation Potentiates Silica Nanoparticle-Induced Circadian Disruption and Lacrimal Gland Dysfunction in Mice
Source: Research Square preprint supplement (doi:10.21203/rs.3.rs-6562058/v1), 2025-05-09
Supplement: Supplementary file 3 [file 35ab3d15b3e27ff34d9441fb.xlsx]

## Sheet: Sheet1
Table S17 Neural-related transcripts in the NC and SiNPs-treated ELGs.
SiNPs-treated/NC		SD+SiNPs-treated/NC
Gene Symbol	Remarks	Gene Symbol	Remarks
'Slc6a4'	up-regulated	'Thbs4'	up-regulated
'Plppr1'	up-regulated	'Dok5'	up-regulated
'Sncg'	up-regulated	'Slc6a4'	up-regulated
'Gdap1'	up-regulated	'Nog'	up-regulated
'Ffar2'	up-regulated	'Igdcc3'	up-regulated
'Gfra4'	up-regulated	'Kcnmb4'	up-regulated
'Pmp2'	up-regulated	'Sncg'	up-regulated
'Igdcc3'	up-regulated	'Fgf18'	up-regulated
'Myoc'	up-regulated	'Npy2r'	up-regulated
'Galnt13'	up-regulated	'Sarm1'	up-regulated
'Spry3'	up-regulated	'Lrfn2'	up-regulated
'Scn2a'	up-regulated	'Crb1'	up-regulated
'Uchl1'	up-regulated	'Rspo1'	up-regulated
'Insc'	up-regulated	'1700013F07Rik'	up-regulated
'Ntn3'	up-regulated	'Adora1'	up-regulated
'Dcx'	up-regulated	'Musk'	up-regulated
'Ifi27l2a'	up-regulated	'Syt4'	up-regulated
'Camk1g'	up-regulated	'Neurod2'	up-regulated
'Brsk1'	up-regulated	'Cntn1'	up-regulated
'Sarm1'	up-regulated	'Dcx'	up-regulated
'Npy2r'	up-regulated	'Scn2a'	up-regulated
'Hrh1'	up-regulated	'Fxyd6'	up-regulated
'Thbs4'	up-regulated	'Zic5'	up-regulated
'Nog'	up-regulated	'Olig1'	up-regulated
'Lrrtm2'	up-regulated	'Insm1'	up-regulated
'Kcnmb4'	up-regulated	'Heyl'	up-regulated
'Bmpr1b'	up-regulated	'Atp1a2'	up-regulated
'Serpini1'	up-regulated	'Zfp536'	up-regulated
'Prdm8'	up-regulated	'Prdm8'	up-regulated
'Zfp536'	up-regulated	'Gpr83'	up-regulated
'Adora1'	up-regulated	'Mtus2'	up-regulated
'Scn3b'	up-regulated	'Prrx2'	up-regulated
'Stra6'	up-regulated	'Nkx2-2'	up-regulated
'Rspo1'	up-regulated	'Galnt13'	up-regulated
'Lrrtm1'	up-regulated	'Gria1'	up-regulated
'Rimkla'	up-regulated	'Bmpr1b'	up-regulated
'Lrfn2'	up-regulated	'Kcnj8'	up-regulated
'Pou3f2'	up-regulated	'Elavl2'	up-regulated
'Syt4'	up-regulated	'Lrrtm1'	up-regulated
'Rasl10b'	up-regulated	'Uchl1'	up-regulated
'Hoxd10'	up-regulated	'Scn3b'	up-regulated
'Olig1'	up-regulated	'Paqr9'	up-regulated
'Crb1'	up-regulated	'Gfra4'	up-regulated
'Mfsd2a'	up-regulated	'Plag1'	up-regulated
'Scn2b'	up-regulated	'Pou4f1'	up-regulated
'Insm1'	up-regulated	'Ror1'	up-regulated
'Cd4'	up-regulated	'Brsk1'	up-regulated
'Gamt'	up-regulated	'Lrrn1'	up-regulated
'Pirt'	up-regulated	'Gata2'	up-regulated
'Insyn1'	up-regulated	'Kcnb1'	up-regulated
'Cntn1'	up-regulated	'Camk1g'	up-regulated
'Nanos1'	up-regulated	'Scn2b'	up-regulated
'Gata2'	up-regulated	'Sox5'	up-regulated
'Ror1'	up-regulated	'Kif26b'	up-regulated
'Prss12'	up-regulated	'Prss12'	up-regulated
'Gdf1'	up-regulated	'Rimkla'	up-regulated
'Igf2bp3'	up-regulated	'Pou3f2'	up-regulated
'Atp1a2'	up-regulated	'Gdap1'	up-regulated
'Erc2'	up-regulated	'Rasl10b'	up-regulated
'Fxyd6'	up-regulated	'Sim2'	up-regulated
'Sh2b2'	up-regulated	'Hoxd10'	up-regulated
'Ephb1'	up-regulated	'Igf2bp3'	up-regulated
'Pou4f1'	up-regulated	'Ngf'	up-regulated
'Pak3'	up-regulated	'Gli1'	up-regulated
'Prrx2'	up-regulated	'Gdf1'	up-regulated
'Mag'	up-regulated	'Glrb'	up-regulated
'Aspa'	up-regulated	'Gjc2'	up-regulated
'Cntnap5a'	up-regulated	'Gsn'	up-regulated
'Gldn'	up-regulated	'Insyn1'	up-regulated
'Dok5'	up-regulated	'Aspa'	up-regulated
'Zic5'	up-regulated	'Mfsd2a'	up-regulated
'Sim2'	up-regulated	'Apcdd1'	up-regulated
'Gria1'	up-regulated	'Vstm4'	up-regulated
'Neurod2'	up-regulated	'Ctf2'	up-regulated
'Dcc'	up-regulated	'Gfra3'	up-regulated
'Sox5'	up-regulated	'Hrh3'	up-regulated
'Kcnj8'	up-regulated	'Spry3'	up-regulated
'Musk'	up-regulated	'Fmn2'	up-regulated
'Fgf18'	up-regulated	'Cntn6'	up-regulated
'Kcnj2'	up-regulated	'Ffar2'	up-regulated
'Plag1'	up-regulated	'Cyp2u1'	up-regulated
'Heyl'	up-regulated	'Grhl3'	up-regulated
'Cntn3'	up-regulated	'Sh2b2'	up-regulated
'Lrrn1'	up-regulated	'Ifi27l2a'	up-regulated
'Kcnb1'	up-regulated	'Veph1'	up-regulated
'Apcdd1'	up-regulated	'Hrh1'	up-regulated
'Gfra3'	up-regulated	'Phf6'	up-regulated
'Gli1'	up-regulated	'Insc'	up-regulated
'Hrh3'	up-regulated	'Gamt'	up-regulated
'Gpr83'	up-regulated	'Plppr1'	up-regulated
'Glrb'	up-regulated	'Ncmap'	up-regulated
'Vstm4'	up-regulated	'Elavl3'	up-regulated
'Gsn'	up-regulated	'Grm7'	up-regulated
'Tenm4'	up-regulated	'Sim1'	up-regulated
'Msi1'	up-regulated	'Nhlh2'	up-regulated
'Kif26b'	up-regulated	'Zic1'	up-regulated
'Cyp2u1'	up-regulated	'Erc2'	down-regulated
'Phf6'	up-regulated	'Serpini1'	down-regulated
'Zfp57'	down-regulated	'Myrf'	down-regulated
'Paqr6'	down-regulated	'Cntnap2'	down-regulated
'Paqr9'	down-regulated	'Cd4'	down-regulated
'Grm7'	down-regulated	'Nlgn3'	down-regulated
'Cplx1'	down-regulated	'Onecut2'	down-regulated
'Hapln2'	down-regulated	'Gfra1'	down-regulated
'C1ql1'	down-regulated	'Stra6'	down-regulated
'Dner'	down-regulated	'Pak3'	down-regulated
'Cntn6'	down-regulated	'Adcy1'	down-regulated
'Nhlh2'	down-regulated	'Cplx1'	down-regulated
'Kcnj11'	down-regulated	'Gldn'	down-regulated
'Mobp'	down-regulated	'Omg'	down-regulated
'1700013F07Rik'	down-regulated	'Pcdh15'	down-regulated
'Osm'	down-regulated	'Hapln2'	down-regulated
'Ulk4'	down-regulated	'Lrrtm2'	down-regulated
'Tubb2b'	down-regulated	'Kcnj11'	down-regulated
'Cntnap2'	down-regulated	'Msi1'	down-regulated
'Neto2'	down-regulated	'Cer1'	down-regulated
'Ngf'	down-regulated	'Paqr6'	down-regulated
'Nek2'	down-regulated	'Tll2'	down-regulated
'Mamdc2'	down-regulated	'Kcnj2'	down-regulated
'Gpsm2'	down-regulated	'Neto2'	down-regulated
'Rtn4r'	down-regulated	'Sh3tc2'	down-regulated
'Btg2'	down-regulated	'Gpr37'	down-regulated
'Veph1'	down-regulated	'Lhx9'	down-regulated
'Elavl2'	down-regulated	'Sctr'	down-regulated
'Sh3tc2'	down-regulated	'C1ql1'	down-regulated
'Ect2'	down-regulated	'Dner'	down-regulated
'Myrf'	down-regulated	'Pirt'	down-regulated
'Lhx9'	down-regulated	'Nanos1'	down-regulated
'Fmn2'	down-regulated	'Zfp57'	down-regulated
'Pcdh15'	down-regulated	'Ephb1'	down-regulated
'Elavl4'	down-regulated	'Nrsn1'	down-regulated
'Nefl'	down-regulated	'Eef1akmt4-ece2'	down-regulated
'Nkx2-2'	down-regulated	'Tenm4'	down-regulated
'Cdc20'	down-regulated	'Fa2h'	down-regulated
'Gjc2'	down-regulated	'Mamdc2'	down-regulated
'Mtus2'	down-regulated	'Myt1l'	down-regulated
'Aspm'	down-regulated	'Fgf14'	down-regulated
'Tenm1'	down-regulated	'Il6'	down-regulated
'Nlgn3'	down-regulated	'Cntnap5b'	down-regulated
'Tll2'	down-regulated	'Pmp2'	down-regulated
'Celsr3'	down-regulated	'Cntnap5a'	down-regulated
'Tnc'	down-regulated	'Elavl4'	down-regulated
'Grhl3'	down-regulated	'Nefl'	down-regulated
'Unc5c'	down-regulated	'Tenm1'	down-regulated
'Onecut2'	down-regulated	'Btg2'	down-regulated
'Ctf2'	down-regulated	'Rtn4r'	down-regulated
'Tmem163'	down-regulated	'Gpr3'	down-regulated
'Adcy1'	down-regulated	'Tmem163'	down-regulated
'Elavl3'	down-regulated	'Dmbx1'	down-regulated
'Sctr'	down-regulated	'Mag'	down-regulated
'Sim1'	down-regulated	'Chodl'	down-regulated
'Fa2h'	down-regulated	'Tnc'	down-regulated
'Gfra1'	down-regulated	'Mobp'	down-regulated
'Nrsn1'	down-regulated	'Gpsm2'	down-regulated
'Eef1akmt4-ece2'	down-regulated	'Unc5c'	down-regulated
'Fgf14'	down-regulated	'Tubb2b'	down-regulated
'Il6'	down-regulated	'Nek2'	down-regulated
'Gpr37'	down-regulated	'Hoxb3'	down-regulated
'Phox2a'	down-regulated	'Ect2'	down-regulated
'Omg'	down-regulated	'Ntn3'	down-regulated
'Zic1'	down-regulated	'Cdc20'	down-regulated
'Baalc'	down-regulated	'Aspm'	down-regulated
'Lingo1'	down-regulated	'Phox2a'	down-regulated
'Myt1l'	down-regulated	'Ulk4'	down-regulated
'Cer1'	down-regulated	'Celsr3'	down-regulated
'Fos'	down-regulated	'Baalc'	down-regulated
'Cntnap5b'	down-regulated	'Cntn3'	down-regulated
'Chodl'	down-regulated	'Osm'	down-regulated
'Ncmap'	down-regulated	'Fos'	down-regulated
'Hoxb3'	down-regulated	'Lingo1'	down-regulated
'Gpr3'	down-regulated	'Dcc'	down-regulated
'Dmbx1'	down-regulated
