# Supplementary material for: Sleep Deprivation Potentiates Silica Nanoparticle-Induced Circadian Disruption and Lacrimal Gland Dysfunction in Mice
Source: Research Square preprint supplement (doi:10.21203/rs.3.rs-6562058/v1), 2025-05-09
Supplement: Supplementary file 4 [file 42ddef3f54088c1b04077601.xlsx]

## Sheet: Sheet1
Table S16 The top10 KEGG pathways for immune-related transcripts in the NC and SiNPs-treated ELGs.
KEGG Pathway Term ID	KEGG Pathway Term Desc	Term Candidate Gene Num	Total Candidate Gene Num	Term Gene Num	Total Gene Num	Rich Ratio	P value	Q value
4060	Cytokine-cytokine receptor interaction	38	128	291	8767	0.130584	2.03431e-26	3.17353e-24
4659	Th17 cell differentiation	14	128	105	8767	0.133333	2.90723e-10	1.51176e-08
4660	T cell receptor signaling pathway	11	128	103	8767	0.106796	2.66602e-07	6.93164e-06
4658	Th1 and Th2 cell differentiation	10	128	88	8767	0.113636	5.32462e-07	1.18663e-05
4062	Chemokine signaling pathway	14	128	191	8767	0.0732984	6.65859e-07	1.29843e-05
4630	JAK-STAT signaling pathway	13	128	168	8767	0.077381	9.25015e-07	1.60336e-05
4650	Natural killer cell mediated cytotoxicity	10	128	112	8767	0.0892857	4.96781e-06	7.04526e-05
4657	IL-17 signaling pathway	9	128	91	8767	0.0989011	6.49536e-06	8.44396e-05
4064	NF-kappa B signaling pathway	8	128	105	8767	0.0761905	0.000141285	0.00146937
4625	C-type lectin receptor signaling pathway	8	128	112	8767	0.0714286	0.000221277	0.00202414
