# Supplementary material for: Sleep Deprivation Potentiates Silica Nanoparticle-Induced Circadian Disruption and Lacrimal Gland Dysfunction in Mice
Source: Research Square preprint supplement (doi:10.21203/rs.3.rs-6562058/v1), 2025-05-09
Supplement: Supplementary file 9 [file 50ebcabc2b49ca149e0bbab4.xlsx]

## Sheet: Sheet1
Table S4. Unique and shared rhythmic genes identified in ELGs among NC, SiNPs, SD+SiNPs treatments, categorized by treatment group and overlap.
Gene ID	Gene Symbol	Mark	Gene ID	Gene Symbol	Mark	Gene.ID	Gene Symbol	Mark	Gene.ID	Gene Symbol	Mark
11303	'Abca1'	Unique rhythmic genes in ELGs of NC treatment.	11451	Acrv1	Unique rhythmic genes in ELGs of SiNPs treatment.	11302	Aatk	Unique rhythmic genes in ELGs of SD+SiNPs treatment.	11364	'Acadm'	Shared rhythmic genes in ELGs among NC, SiNPs, SD+SiNPs treatments
11350	'Abl1'	Unique rhythmic genes in ELGs of NC treatment.	11486	Ada	Unique rhythmic genes in ELGs of SiNPs treatment.	11461	Actb	Unique rhythmic genes in ELGs of SD+SiNPs treatment.	11409	'Acads'	Shared rhythmic genes in ELGs among NC, SiNPs, SD+SiNPs treatments
11352	'Abl2'	Unique rhythmic genes in ELGs of NC treatment.	11549	Adra1a	Unique rhythmic genes in ELGs of SiNPs treatment.	11498	Adam4	Unique rhythmic genes in ELGs of SD+SiNPs treatment.	11430	'Acox1'	Shared rhythmic genes in ELGs among NC, SiNPs, SD+SiNPs treatments
11354	'Scgb1b27'	Unique rhythmic genes in ELGs of NC treatment.	11606	Agt	Unique rhythmic genes in ELGs of SiNPs treatment.	11501	Adam8	Unique rhythmic genes in ELGs of SD+SiNPs treatment.	11465	'Actg1'	Shared rhythmic genes in ELGs among NC, SiNPs, SD+SiNPs treatments
11416	'Slc33a1'	Unique rhythmic genes in ELGs of NC treatment.	11676	Aldoc	Unique rhythmic genes in ELGs of SiNPs treatment.	11532	Adh5	Unique rhythmic genes in ELGs of SD+SiNPs treatment.	11522	'Adh1'	Shared rhythmic genes in ELGs among NC, SiNPs, SD+SiNPs treatments
11432	'Acp2'	Unique rhythmic genes in ELGs of NC treatment.	11737	Anp32a	Unique rhythmic genes in ELGs of SiNPs treatment.	11535	Adm	Unique rhythmic genes in ELGs of SD+SiNPs treatment.	11565	'Adssl1'	Shared rhythmic genes in ELGs among NC, SiNPs, SD+SiNPs treatments
11433	'Acp5'	Unique rhythmic genes in ELGs of NC treatment.	11777	Ap3s1	Unique rhythmic genes in ELGs of SiNPs treatment.	11540	Adora2a	Unique rhythmic genes in ELGs of SD+SiNPs treatment.	11601	'Angpt2'	Shared rhythmic genes in ELGs among NC, SiNPs, SD+SiNPs treatments
11518	'Add1'	Unique rhythmic genes in ELGs of NC treatment.	11821	Aprt	Unique rhythmic genes in ELGs of SiNPs treatment.	11571	Crisp1	Unique rhythmic genes in ELGs of SD+SiNPs treatment.	11655	'Alas1'	Shared rhythmic genes in ELGs among NC, SiNPs, SD+SiNPs treatments
11529	'Adh7'	Unique rhythmic genes in ELGs of NC treatment.	11835	Ar	Unique rhythmic genes in ELGs of SiNPs treatment.	11684	Alox12	Unique rhythmic genes in ELGs of SD+SiNPs treatment.	11668	'Aldh1a1'	Shared rhythmic genes in ELGs among NC, SiNPs, SD+SiNPs treatments
11546	'Parp2'	Unique rhythmic genes in ELGs of NC treatment.	11844	Arf5	Unique rhythmic genes in ELGs of SiNPs treatment.	11727	Ang	Unique rhythmic genes in ELGs of SD+SiNPs treatment.	11750	'Anxa7'	Shared rhythmic genes in ELGs among NC, SiNPs, SD+SiNPs treatments
11567	'Avil'	Unique rhythmic genes in ELGs of NC treatment.	11911	Atf4	Unique rhythmic genes in ELGs of SiNPs treatment.	11735	Ank3	Unique rhythmic genes in ELGs of SD+SiNPs treatment.	11758	'Prdx6'	Shared rhythmic genes in ELGs among NC, SiNPs, SD+SiNPs treatments
11605	'Gla'	Unique rhythmic genes in ELGs of NC treatment.	12007	Azgp1	Unique rhythmic genes in ELGs of SiNPs treatment.	11749	Anxa6	Unique rhythmic genes in ELGs of SD+SiNPs treatment.	11819	'Nr2f2'	Shared rhythmic genes in ELGs among NC, SiNPs, SD+SiNPs treatments
11630	'Crybg1'	Unique rhythmic genes in ELGs of NC treatment.	12015	Bad	Unique rhythmic genes in ELGs of SiNPs treatment.	11768	Ap1m2	Unique rhythmic genes in ELGs of SD+SiNPs treatment.	11854	'Rhod'	Shared rhythmic genes in ELGs among NC, SiNPs, SD+SiNPs treatments
11639	'Ak4'	Unique rhythmic genes in ELGs of NC treatment.	12036	Bcat2	Unique rhythmic genes in ELGs of SiNPs treatment.	11773	Ap2m1	Unique rhythmic genes in ELGs of SD+SiNPs treatment.	11865	'Arntl'	Shared rhythmic genes in ELGs among NC, SiNPs, SD+SiNPs treatments
11641	'Akap2'	Unique rhythmic genes in ELGs of NC treatment.	12048	Bcl2l1	Unique rhythmic genes in ELGs of SiNPs treatment.	11789	Apc	Unique rhythmic genes in ELGs of SD+SiNPs treatment.	11949	'Atp5c1'	Shared rhythmic genes in ELGs among NC, SiNPs, SD+SiNPs treatments
11674	'Aldoa'	Unique rhythmic genes in ELGs of NC treatment.	12053	Bcl6	Unique rhythmic genes in ELGs of SiNPs treatment.	11804	Aplp2	Unique rhythmic genes in ELGs of SD+SiNPs treatment.	11992	'Auh'	Shared rhythmic genes in ELGs among NC, SiNPs, SD+SiNPs treatments
11810	'Apobec1'	Unique rhythmic genes in ELGs of NC treatment.	12095	Bglap3	Unique rhythmic genes in ELGs of SiNPs treatment.	11820	App	Unique rhythmic genes in ELGs of SD+SiNPs treatment.	12009	'Cep131'	Shared rhythmic genes in ELGs among NC, SiNPs, SD+SiNPs treatments
11833	'Aqp8'	Unique rhythmic genes in ELGs of NC treatment.	12169	Bmx	Unique rhythmic genes in ELGs of SiNPs treatment.	11841	Arf2	Unique rhythmic genes in ELGs of SD+SiNPs treatment.	12014	'Bach2'	Shared rhythmic genes in ELGs among NC, SiNPs, SD+SiNPs treatments
11877	'Arvcf'	Unique rhythmic genes in ELGs of NC treatment.	12181	Bop1	Unique rhythmic genes in ELGs of SiNPs treatment.	11842	Arf3	Unique rhythmic genes in ELGs of SD+SiNPs treatment.	12034	'Phb2'	Shared rhythmic genes in ELGs among NC, SiNPs, SD+SiNPs treatments
11886	'Asah1'	Unique rhythmic genes in ELGs of NC treatment.	12211	Birc6	Unique rhythmic genes in ELGs of SiNPs treatment.	11847	Arg2	Unique rhythmic genes in ELGs of SD+SiNPs treatment.	12038	'Bche'	Shared rhythmic genes in ELGs among NC, SiNPs, SD+SiNPs treatments
11891	'Rab27a'	Unique rhythmic genes in ELGs of NC treatment.	12316	Aspm	Unique rhythmic genes in ELGs of SiNPs treatment.	11881	Arsb	Unique rhythmic genes in ELGs of SD+SiNPs treatment.	12039	'Bckdha'	Shared rhythmic genes in ELGs among NC, SiNPs, SD+SiNPs treatments
11906	'Zfhx3'	Unique rhythmic genes in ELGs of NC treatment.	12330	Canx	Unique rhythmic genes in ELGs of SiNPs treatment.	11908	Atf1	Unique rhythmic genes in ELGs of SD+SiNPs treatment.	12055	'Bcl7c'	Shared rhythmic genes in ELGs among NC, SiNPs, SD+SiNPs treatments
12005	'Axin1'	Unique rhythmic genes in ELGs of NC treatment.	12411	Cbs	Unique rhythmic genes in ELGs of SiNPs treatment.	11920	Atm	Unique rhythmic genes in ELGs of SD+SiNPs treatment.	12144	'Blm'	Shared rhythmic genes in ELGs among NC, SiNPs, SD+SiNPs treatments
12010	'B2m'	Unique rhythmic genes in ELGs of NC treatment.	12444	Ccnd2	Unique rhythmic genes in ELGs of SiNPs treatment.	11933	Atp1b3	Unique rhythmic genes in ELGs of SD+SiNPs treatment.	12176	'Bnip3'	Shared rhythmic genes in ELGs among NC, SiNPs, SD+SiNPs treatments
12043	'Bcl2'	Unique rhythmic genes in ELGs of NC treatment.	12490	Cd34	Unique rhythmic genes in ELGs of SiNPs treatment.	11936	Fxyd2	Unique rhythmic genes in ELGs of SD+SiNPs treatment.	12234	'Btrc'	Shared rhythmic genes in ELGs among NC, SiNPs, SD+SiNPs treatments
12050	'Bcl2l2'	Unique rhythmic genes in ELGs of NC treatment.	12496	Entpd2	Unique rhythmic genes in ELGs of SiNPs treatment.	11946	Atp5a1	Unique rhythmic genes in ELGs of SD+SiNPs treatment.	12301	'Cacybp'	Shared rhythmic genes in ELGs among NC, SiNPs, SD+SiNPs treatments
12091	'Glb1'	Unique rhythmic genes in ELGs of NC treatment.	12499	Entpd5	Unique rhythmic genes in ELGs of SiNPs treatment.	11964	Atp6v1a	Unique rhythmic genes in ELGs of SD+SiNPs treatment.	12337	'Capn5'	Shared rhythmic genes in ELGs among NC, SiNPs, SD+SiNPs treatments
12125	'Bcl2l11'	Unique rhythmic genes in ELGs of NC treatment.	12502	Cd3g	Unique rhythmic genes in ELGs of SiNPs treatment.	11966	Atp6v1b2	Unique rhythmic genes in ELGs of SD+SiNPs treatment.	12367	'Casp3'	Shared rhythmic genes in ELGs among NC, SiNPs, SD+SiNPs treatments
12261	'C1qbp'	Unique rhythmic genes in ELGs of NC treatment.	12534	Cdk1	Unique rhythmic genes in ELGs of SiNPs treatment.	11987	Slc7a1	Unique rhythmic genes in ELGs of SD+SiNPs treatment.	12368	'Casp6'	Shared rhythmic genes in ELGs among NC, SiNPs, SD+SiNPs treatments
12279	'C9'	Unique rhythmic genes in ELGs of NC treatment.	12579	Cdkn2b	Unique rhythmic genes in ELGs of SiNPs treatment.	11988	Slc7a2	Unique rhythmic genes in ELGs of SD+SiNPs treatment.	12369	'Casp7'	Shared rhythmic genes in ELGs among NC, SiNPs, SD+SiNPs treatments
12283	'Cab39'	Unique rhythmic genes in ELGs of NC treatment.	12580	Cdkn2c	Unique rhythmic genes in ELGs of SiNPs treatment.	12006	Axin2	Unique rhythmic genes in ELGs of SD+SiNPs treatment.	12409	'Cbr2'	Shared rhythmic genes in ELGs among NC, SiNPs, SD+SiNPs treatments
12333	'Capn1'	Unique rhythmic genes in ELGs of NC treatment.	12581	Cdkn2d	Unique rhythmic genes in ELGs of SiNPs treatment.	12017	Bag1	Unique rhythmic genes in ELGs of SD+SiNPs treatment.	12457	'Noct'	Shared rhythmic genes in ELGs among NC, SiNPs, SD+SiNPs treatments
12349	'Car2'	Unique rhythmic genes in ELGs of NC treatment.	12608	Cebpb	Unique rhythmic genes in ELGs of SiNPs treatment.	12021	Bard1	Unique rhythmic genes in ELGs of SD+SiNPs treatment.	12462	'Cct3'	Shared rhythmic genes in ELGs among NC, SiNPs, SD+SiNPs treatments
12366	'Casp2'	Unique rhythmic genes in ELGs of NC treatment.	12669	Chrm1	Unique rhythmic genes in ELGs of SiNPs treatment.	12068	Bet1	Unique rhythmic genes in ELGs of SD+SiNPs treatment.	12521	'Cd82'	Shared rhythmic genes in ELGs among NC, SiNPs, SD+SiNPs treatments
12380	'Cast'	Unique rhythmic genes in ELGs of NC treatment.	12700	Cish	Unique rhythmic genes in ELGs of SiNPs treatment.	12151	Bmi1	Unique rhythmic genes in ELGs of SD+SiNPs treatment.	12531	'Cdc25b'	Shared rhythmic genes in ELGs among NC, SiNPs, SD+SiNPs treatments
12416	'Cbx2'	Unique rhythmic genes in ELGs of NC treatment.	12816	Col12a1	Unique rhythmic genes in ELGs of SiNPs treatment.	12162	Bmp7	Unique rhythmic genes in ELGs of SD+SiNPs treatment.	12583	'Cdo1'	Shared rhythmic genes in ELGs among NC, SiNPs, SD+SiNPs treatments
12421	'Rb1cc1'	Unique rhythmic genes in ELGs of NC treatment.	12840	Col9a2	Unique rhythmic genes in ELGs of SiNPs treatment.	12168	Bmpr2	Unique rhythmic genes in ELGs of SD+SiNPs treatment.	12585	'Cdr2'	Shared rhythmic genes in ELGs among NC, SiNPs, SD+SiNPs treatments
12509	'Cd59a'	Unique rhythmic genes in ELGs of NC treatment.	12864	Cox6c	Unique rhythmic genes in ELGs of SiNPs treatment.	12228	Btg3	Unique rhythmic genes in ELGs of SD+SiNPs treatment.	12696	'Cirbp'	Shared rhythmic genes in ELGs among NC, SiNPs, SD+SiNPs treatments
12519	'Cd80'	Unique rhythmic genes in ELGs of NC treatment.	12868	Cox8a	Unique rhythmic genes in ELGs of SiNPs treatment.	12229	Btk	Unique rhythmic genes in ELGs of SD+SiNPs treatment.	12724	'Clcn2'	Shared rhythmic genes in ELGs among NC, SiNPs, SD+SiNPs treatments
12576	'Cdkn1b'	Unique rhythmic genes in ELGs of NC treatment.	12895	Cpt1b	Unique rhythmic genes in ELGs of SiNPs treatment.	12265	Ciita	Unique rhythmic genes in ELGs of SD+SiNPs treatment.	12750	'Clk4'	Shared rhythmic genes in ELGs among NC, SiNPs, SD+SiNPs treatments
12593	'Cdyl'	Unique rhythmic genes in ELGs of NC treatment.	12915	Atf6b	Unique rhythmic genes in ELGs of SiNPs treatment.	12293	Cacna2d1	Unique rhythmic genes in ELGs of SD+SiNPs treatment.	12757	'Clta'	Shared rhythmic genes in ELGs among NC, SiNPs, SD+SiNPs treatments
12642	'Ch25h'	Unique rhythmic genes in ELGs of NC treatment.	12934	Dpysl2	Unique rhythmic genes in ELGs of SiNPs treatment.	12321	Calu	Unique rhythmic genes in ELGs of SD+SiNPs treatment.	12874	'Cpd'	Shared rhythmic genes in ELGs among NC, SiNPs, SD+SiNPs treatments
12667	'Chrd'	Unique rhythmic genes in ELGs of NC treatment.	13011	Cst7	Unique rhythmic genes in ELGs of SiNPs treatment.	12325	Camk2g	Unique rhythmic genes in ELGs of SD+SiNPs treatment.	12877	'Cpeb1'	Shared rhythmic genes in ELGs among NC, SiNPs, SD+SiNPs treatments
12751	'Tpp1'	Unique rhythmic genes in ELGs of NC treatment.	13113	Cyp3a13	Unique rhythmic genes in ELGs of SiNPs treatment.	12332	Capg	Unique rhythmic genes in ELGs of SD+SiNPs treatment.	12879	'Cys1'	Shared rhythmic genes in ELGs among NC, SiNPs, SD+SiNPs treatments
12769	'Ccr9'	Unique rhythmic genes in ELGs of NC treatment.	13202	Ddt	Unique rhythmic genes in ELGs of SiNPs treatment.	12343	Capza2	Unique rhythmic genes in ELGs of SD+SiNPs treatment.	12916	'Crem'	Shared rhythmic genes in ELGs among NC, SiNPs, SD+SiNPs treatments
12780	'Abcc2'	Unique rhythmic genes in ELGs of NC treatment.	13507	Dsc3	Unique rhythmic genes in ELGs of SiNPs treatment.	12361	Cask	Unique rhythmic genes in ELGs of SD+SiNPs treatment.	12952	'Cry1'	Shared rhythmic genes in ELGs among NC, SiNPs, SD+SiNPs treatments
12795	'Plk3'	Unique rhythmic genes in ELGs of NC treatment.	13605	Ect2	Unique rhythmic genes in ELGs of SiNPs treatment.	12394	Runx1	Unique rhythmic genes in ELGs of SD+SiNPs treatment.	12955	'Cryab'	Shared rhythmic genes in ELGs among NC, SiNPs, SD+SiNPs treatments
12848	'Cops2'	Unique rhythmic genes in ELGs of NC treatment.	13636	Efna1	Unique rhythmic genes in ELGs of SiNPs treatment.	12443	Ccnd1	Unique rhythmic genes in ELGs of SD+SiNPs treatment.	13056	'Cyb561'	Shared rhythmic genes in ELGs among NC, SiNPs, SD+SiNPs treatments
12946	'Cr1l'	Unique rhythmic genes in ELGs of NC treatment.	13639	Efna4	Unique rhythmic genes in ELGs of SiNPs treatment.	12447	Ccne1	Unique rhythmic genes in ELGs of SD+SiNPs treatment.	13087	'Cyp2a5'	Shared rhythmic genes in ELGs among NC, SiNPs, SD+SiNPs treatments
13001	'Csnk2b'	Unique rhythmic genes in ELGs of NC treatment.	13663	Ei24	Unique rhythmic genes in ELGs of SiNPs treatment.	12476	Cd151	Unique rhythmic genes in ELGs of SD+SiNPs treatment.	13107	'Cyp2f2'	Shared rhythmic genes in ELGs among NC, SiNPs, SD+SiNPs treatments
13051	'Cx3cr1'	Unique rhythmic genes in ELGs of NC treatment.	13665	Eif2s1	Unique rhythmic genes in ELGs of SiNPs treatment.	12493	Cd37	Unique rhythmic genes in ELGs of SD+SiNPs treatment.	13120	'Cyp4b1'	Shared rhythmic genes in ELGs among NC, SiNPs, SD+SiNPs treatments
13139	'Dgka'	Unique rhythmic genes in ELGs of NC treatment.	13667	Eif2b4	Unique rhythmic genes in ELGs of SiNPs treatment.	12514	Cd68	Unique rhythmic genes in ELGs of SD+SiNPs treatment.	13170	'Dbp'	Shared rhythmic genes in ELGs among NC, SiNPs, SD+SiNPs treatments
13171	'Dbt'	Unique rhythmic genes in ELGs of NC treatment.	13684	Eif4e	Unique rhythmic genes in ELGs of SiNPs treatment.	12522	Cd83	Unique rhythmic genes in ELGs of SD+SiNPs treatment.	13197	'Gadd45a'	Shared rhythmic genes in ELGs among NC, SiNPs, SD+SiNPs treatments
13178	'Dck'	Unique rhythmic genes in ELGs of NC treatment.	13804	Endog	Unique rhythmic genes in ELGs of SiNPs treatment.	12523	Cd84	Unique rhythmic genes in ELGs of SD+SiNPs treatment.	13358	'Slc25a1'	Shared rhythmic genes in ELGs among NC, SiNPs, SD+SiNPs treatments
13435	'Dnmt3a'	Unique rhythmic genes in ELGs of NC treatment.	13809	Enpep	Unique rhythmic genes in ELGs of SiNPs treatment.	12544	Cdc45	Unique rhythmic genes in ELGs of SD+SiNPs treatment.	13411	'Dnah11'	Shared rhythmic genes in ELGs among NC, SiNPs, SD+SiNPs treatments
13480	'Dpm1'	Unique rhythmic genes in ELGs of NC treatment.	13813	Eomes	Unique rhythmic genes in ELGs of SiNPs treatment.	12549	Arhgap31	Unique rhythmic genes in ELGs of SD+SiNPs treatment.	13434	'Trdmt1'	Shared rhythmic genes in ELGs among NC, SiNPs, SD+SiNPs treatments
13496	'Arid3a'	Unique rhythmic genes in ELGs of NC treatment.	13866	Erbb2	Unique rhythmic genes in ELGs of SiNPs treatment.	12662	Chm	Unique rhythmic genes in ELGs of SD+SiNPs treatment.	13506	'Dsc2'	Shared rhythmic genes in ELGs among NC, SiNPs, SD+SiNPs treatments
13522	'Adam28'	Unique rhythmic genes in ELGs of NC treatment.	13983	Esr2	Unique rhythmic genes in ELGs of SiNPs treatment.	12728	Clcn5	Unique rhythmic genes in ELGs of SD+SiNPs treatment.	13527	'Dtna'	Shared rhythmic genes in ELGs among NC, SiNPs, SD+SiNPs treatments
13619	'Phc1'	Unique rhythmic genes in ELGs of NC treatment.	14061	F2	Unique rhythmic genes in ELGs of SiNPs treatment.	12729	Clns1a	Unique rhythmic genes in ELGs of SD+SiNPs treatment.	13685	'Eif4ebp1'	Shared rhythmic genes in ELGs among NC, SiNPs, SD+SiNPs treatments
13723	'Emb'	Unique rhythmic genes in ELGs of NC treatment.	14087	Fanca	Unique rhythmic genes in ELGs of SiNPs treatment.	12737	Cldn1	Unique rhythmic genes in ELGs of SD+SiNPs treatment.	13722	'Aimp1'	Shared rhythmic genes in ELGs among NC, SiNPs, SD+SiNPs treatments
13831	'Epc1'	Unique rhythmic genes in ELGs of NC treatment.	14088	Fancc	Unique rhythmic genes in ELGs of SiNPs treatment.	12740	Cldn4	Unique rhythmic genes in ELGs of SD+SiNPs treatment.	13824	'Epb41l4a'	Shared rhythmic genes in ELGs among NC, SiNPs, SD+SiNPs treatments
13836	'Epha2'	Unique rhythmic genes in ELGs of NC treatment.	14109	Fau	Unique rhythmic genes in ELGs of SiNPs treatment.	12748	Clk2	Unique rhythmic genes in ELGs of SD+SiNPs treatment.	13849	'Ephx1'	Shared rhythmic genes in ELGs among NC, SiNPs, SD+SiNPs treatments
13853	'Epm2a'	Unique rhythmic genes in ELGs of NC treatment.	14114	Fbln1	Unique rhythmic genes in ELGs of SiNPs treatment.	12775	Ccr7	Unique rhythmic genes in ELGs of SD+SiNPs treatment.	14009	'Etv1'	Shared rhythmic genes in ELGs among NC, SiNPs, SD+SiNPs treatments
13858	'Eps15'	Unique rhythmic genes in ELGs of NC treatment.	14165	Fgf10	Unique rhythmic genes in ELGs of SiNPs treatment.	12830	Col4a5	Unique rhythmic genes in ELGs of SD+SiNPs treatment.	14070	'F8a'	Shared rhythmic genes in ELGs among NC, SiNPs, SD+SiNPs treatments
14069	'F8'	Unique rhythmic genes in ELGs of NC treatment.	14254	Flt1	Unique rhythmic genes in ELGs of SiNPs treatment.	12841	Col9a3	Unique rhythmic genes in ELGs of SD+SiNPs treatment.	14148	'Fdx1'	Shared rhythmic genes in ELGs among NC, SiNPs, SD+SiNPs treatments
14105	'Srsf10'	Unique rhythmic genes in ELGs of NC treatment.	14300	Frg1	Unique rhythmic genes in ELGs of SiNPs treatment.	12892	Cpox	Unique rhythmic genes in ELGs of SD+SiNPs treatment.	14181	'Fgfbp1'	Shared rhythmic genes in ELGs among NC, SiNPs, SD+SiNPs treatments
14137	'Fdft1'	Unique rhythmic genes in ELGs of NC treatment.	14313	Fst	Unique rhythmic genes in ELGs of SiNPs treatment.	12904	Crabp2	Unique rhythmic genes in ELGs of SD+SiNPs treatment.	14218	'Sh3pxd2a'	Shared rhythmic genes in ELGs among NC, SiNPs, SD+SiNPs treatments
14164	'Fgf1'	Unique rhythmic genes in ELGs of NC treatment.	14430	Galt	Unique rhythmic genes in ELGs of SiNPs treatment.	12945	Dmbt1	Unique rhythmic genes in ELGs of SD+SiNPs treatment.	14219	'Ccn2'	Shared rhythmic genes in ELGs among NC, SiNPs, SD+SiNPs treatments
14190	'Fgl2'	Unique rhythmic genes in ELGs of NC treatment.	14451	Gas1	Unique rhythmic genes in ELGs of SiNPs treatment.	12982	Csf2ra	Unique rhythmic genes in ELGs of SD+SiNPs treatment.	14228	'Fkbp4'	Shared rhythmic genes in ELGs among NC, SiNPs, SD+SiNPs treatments
14205	'Vegfd'	Unique rhythmic genes in ELGs of NC treatment.	14548	Mrps33	Unique rhythmic genes in ELGs of SiNPs treatment.	13033	Ctsd	Unique rhythmic genes in ELGs of SD+SiNPs treatment.	14272	'Fnta'	Shared rhythmic genes in ELGs among NC, SiNPs, SD+SiNPs treatments
14225	'Fkbp1a'	Unique rhythmic genes in ELGs of NC treatment.	14583	Gfpt1	Unique rhythmic genes in ELGs of SiNPs treatment.	13043	Cttn	Unique rhythmic genes in ELGs of SD+SiNPs treatment.	14385	'Slc37a4'	Shared rhythmic genes in ELGs among NC, SiNPs, SD+SiNPs treatments
14229	'Fkbp5'	Unique rhythmic genes in ELGs of NC treatment.	14686	Gnat2	Unique rhythmic genes in ELGs of SiNPs treatment.	13110	Cyp2j6	Unique rhythmic genes in ELGs of SD+SiNPs treatment.	14555	'Gpd1'	Shared rhythmic genes in ELGs among NC, SiNPs, SD+SiNPs treatments
14234	'Foxc2'	Unique rhythmic genes in ELGs of NC treatment.	14744	Gpr65	Unique rhythmic genes in ELGs of SiNPs treatment.	13175	Dclk1	Unique rhythmic genes in ELGs of SD+SiNPs treatment.	14608	'Gpr83'	Shared rhythmic genes in ELGs among NC, SiNPs, SD+SiNPs treatments
14270	'Srgap2'	Unique rhythmic genes in ELGs of NC treatment.	14747	Cmklr1	Unique rhythmic genes in ELGs of SiNPs treatment.	13191	Dctn1	Unique rhythmic genes in ELGs of SD+SiNPs treatment.	14645	'Glul'	Shared rhythmic genes in ELGs among NC, SiNPs, SD+SiNPs treatments
14345	'Fut4'	Unique rhythmic genes in ELGs of NC treatment.	14773	Grk5	Unique rhythmic genes in ELGs of SiNPs treatment.	13198	Ddit3	Unique rhythmic genes in ELGs of SD+SiNPs treatment.	14664	'Slc6a9'	Shared rhythmic genes in ELGs among NC, SiNPs, SD+SiNPs treatments
14369	'Fzd7'	Unique rhythmic genes in ELGs of NC treatment.	14786	Grb7	Unique rhythmic genes in ELGs of SiNPs treatment.	13205	Ddx3x	Unique rhythmic genes in ELGs of SD+SiNPs treatment.	14693	'Gnb2'	Shared rhythmic genes in ELGs among NC, SiNPs, SD+SiNPs treatments
14370	'Fzd8'	Unique rhythmic genes in ELGs of NC treatment.	14793	Cdca3	Unique rhythmic genes in ELGs of SiNPs treatment.	13350	Dgat1	Unique rhythmic genes in ELGs of SD+SiNPs treatment.	14705	'Bscl2'	Shared rhythmic genes in ELGs among NC, SiNPs, SD+SiNPs treatments
14389	'Gab2'	Unique rhythmic genes in ELGs of NC treatment.	14872	Gstt2	Unique rhythmic genes in ELGs of SiNPs treatment.	13361	Dhfr	Unique rhythmic genes in ELGs of SD+SiNPs treatment.	14712	'Gnpat'	Shared rhythmic genes in ELGs among NC, SiNPs, SD+SiNPs treatments
14391	'Gabpb1'	Unique rhythmic genes in ELGs of NC treatment.	14917	Gucy2c	Unique rhythmic genes in ELGs of SiNPs treatment.	13405	Dmd	Unique rhythmic genes in ELGs of SD+SiNPs treatment.	14732	'Gpam'	Shared rhythmic genes in ELGs among NC, SiNPs, SD+SiNPs treatments
14453	'Gas2'	Unique rhythmic genes in ELGs of NC treatment.	14976	Pfdn6	Unique rhythmic genes in ELGs of SiNPs treatment.	13511	Dsg2	Unique rhythmic genes in ELGs of SD+SiNPs treatment.	14824	'Grn'	Shared rhythmic genes in ELGs among NC, SiNPs, SD+SiNPs treatments
14469	'Gbp2'	Unique rhythmic genes in ELGs of NC treatment.	15039	H2-T22	Unique rhythmic genes in ELGs of SiNPs treatment.	13555	E2f1	Unique rhythmic genes in ELGs of SD+SiNPs treatment.	14827	'Pdia3'	Shared rhythmic genes in ELGs among NC, SiNPs, SD+SiNPs treatments
14560	'Gdf10'	Unique rhythmic genes in ELGs of NC treatment.	15040	H2-T23	Unique rhythmic genes in ELGs of SiNPs treatment.	13557	E2f3	Unique rhythmic genes in ELGs of SD+SiNPs treatment.	14859	'Gsta3'	Shared rhythmic genes in ELGs among NC, SiNPs, SD+SiNPs treatments
14580	'Gfap'	Unique rhythmic genes in ELGs of NC treatment.	15077	H3c14	Unique rhythmic genes in ELGs of SiNPs treatment.	13595	Ebp	Unique rhythmic genes in ELGs of SD+SiNPs treatment.	14894	'Cfap20'	Shared rhythmic genes in ELGs among NC, SiNPs, SD+SiNPs treatments
14619	'Gjb2'	Unique rhythmic genes in ELGs of NC treatment.	15115	Hars	Unique rhythmic genes in ELGs of SiNPs treatment.	13626	Eed	Unique rhythmic genes in ELGs of SD+SiNPs treatment.	14958	'H1f0'	Shared rhythmic genes in ELGs among NC, SiNPs, SD+SiNPs treatments
14667	'Gm2a'	Unique rhythmic genes in ELGs of NC treatment.	15117	Has2	Unique rhythmic genes in ELGs of SiNPs treatment.	13627	Eef1a1	Unique rhythmic genes in ELGs of SD+SiNPs treatment.	15081	'H3f3b'	Shared rhythmic genes in ELGs among NC, SiNPs, SD+SiNPs treatments
14670	'Gnl1'	Unique rhythmic genes in ELGs of NC treatment.	15193	Hdgfl2	Unique rhythmic genes in ELGs of SiNPs treatment.	13645	Egf	Unique rhythmic genes in ELGs of SD+SiNPs treatment.	15107	'Hadh'	Shared rhythmic genes in ELGs among NC, SiNPs, SD+SiNPs treatments
14674	'Gna13'	Unique rhythmic genes in ELGs of NC treatment.	15199	Hebp1	Unique rhythmic genes in ELGs of SiNPs treatment.	13688	Eif4ebp2	Unique rhythmic genes in ELGs of SD+SiNPs treatment.	15108	'Hsd17b10'	Shared rhythmic genes in ELGs among NC, SiNPs, SD+SiNPs treatments
14809	'Grik5'	Unique rhythmic genes in ELGs of NC treatment.	15204	Herc2	Unique rhythmic genes in ELGs of SiNPs treatment.	13709	Elf1	Unique rhythmic genes in ELGs of SD+SiNPs treatment.	15184	'Hdac5'	Shared rhythmic genes in ELGs among NC, SiNPs, SD+SiNPs treatments
14854	'Gss'	Unique rhythmic genes in ELGs of NC treatment.	15366	Hmmr	Unique rhythmic genes in ELGs of SiNPs treatment.	13710	Elf3	Unique rhythmic genes in ELGs of SD+SiNPs treatment.	15186	'Hdc'	Shared rhythmic genes in ELGs among NC, SiNPs, SD+SiNPs treatments
14874	'Gstz1'	Unique rhythmic genes in ELGs of NC treatment.	15374	Jpt1	Unique rhythmic genes in ELGs of SiNPs treatment.	13821	Epb41l1	Unique rhythmic genes in ELGs of SD+SiNPs treatment.	15331	'Hmgn2'	Shared rhythmic genes in ELGs among NC, SiNPs, SD+SiNPs treatments
14957	'H1f3'	Unique rhythmic genes in ELGs of NC treatment.	15483	Hsd11b1	Unique rhythmic genes in ELGs of SiNPs treatment.	13848	Ephb6	Unique rhythmic genes in ELGs of SD+SiNPs treatment.	15354	'Hmgb3'	Shared rhythmic genes in ELGs among NC, SiNPs, SD+SiNPs treatments
15042	'H2-T24'	Unique rhythmic genes in ELGs of NC treatment.	15568	Elavl1	Unique rhythmic genes in ELGs of SiNPs treatment.	13850	Ephx2	Unique rhythmic genes in ELGs of SD+SiNPs treatment.	15361	'Hmga1'	Shared rhythmic genes in ELGs among NC, SiNPs, SD+SiNPs treatments
15211	'Hexa'	Unique rhythmic genes in ELGs of NC treatment.	15901	Id1	Unique rhythmic genes in ELGs of SiNPs treatment.	13855	Epn2	Unique rhythmic genes in ELGs of SD+SiNPs treatment.	15382	'Hnrnpa1'	Shared rhythmic genes in ELGs among NC, SiNPs, SD+SiNPs treatments
15216	'Hfe'	Unique rhythmic genes in ELGs of NC treatment.	15976	Ifnar2	Unique rhythmic genes in ELGs of SiNPs treatment.	13885	Esd	Unique rhythmic genes in ELGs of SD+SiNPs treatment.	15387	'Hnrnpk'	Shared rhythmic genes in ELGs among NC, SiNPs, SD+SiNPs treatments
15248	'Hic1'	Unique rhythmic genes in ELGs of NC treatment.	16002	Igf2	Unique rhythmic genes in ELGs of SiNPs treatment.	13897	Ces1e	Unique rhythmic genes in ELGs of SD+SiNPs treatment.	15388	'Hnrnpl'	Shared rhythmic genes in ELGs among NC, SiNPs, SD+SiNPs treatments
15356	'Hmgcl'	Unique rhythmic genes in ELGs of NC treatment.	16168	Il15	Unique rhythmic genes in ELGs of SiNPs treatment.	13929	Amz2	Unique rhythmic genes in ELGs of SD+SiNPs treatment.	15481	'Hspa8'	Shared rhythmic genes in ELGs among NC, SiNPs, SD+SiNPs treatments
15369	'Hmox2'	Unique rhythmic genes in ELGs of NC treatment.	16169	Il15ra	Unique rhythmic genes in ELGs of SiNPs treatment.	14025	Bcl11a	Unique rhythmic genes in ELGs of SD+SiNPs treatment.	15502	'Dnaja1'	Shared rhythmic genes in ELGs among NC, SiNPs, SD+SiNPs treatments
15370	'Nr4a1'	Unique rhythmic genes in ELGs of NC treatment.	16192	Il5ra	Unique rhythmic genes in ELGs of SiNPs treatment.	14043	Ext2	Unique rhythmic genes in ELGs of SD+SiNPs treatment.	15505	'Hsph1'	Shared rhythmic genes in ELGs among NC, SiNPs, SD+SiNPs treatments
15547	'Trmt2a'	Unique rhythmic genes in ELGs of NC treatment.	16324	Inhbb	Unique rhythmic genes in ELGs of SiNPs treatment.	14049	Eya2	Unique rhythmic genes in ELGs of SD+SiNPs treatment.	15510	'Hspd1'	Shared rhythmic genes in ELGs among NC, SiNPs, SD+SiNPs treatments
15900	'Irf8'	Unique rhythmic genes in ELGs of NC treatment.	16432	Itm2b	Unique rhythmic genes in ELGs of SiNPs treatment.	14055	Ezh1	Unique rhythmic genes in ELGs of SD+SiNPs treatment.	15511	'Hspa1b'	Shared rhythmic genes in ELGs among NC, SiNPs, SD+SiNPs treatments
16154	'Il10ra'	Unique rhythmic genes in ELGs of NC treatment.	16469	Jrk	Unique rhythmic genes in ELGs of SiNPs treatment.	14056	Ezh2	Unique rhythmic genes in ELGs of SD+SiNPs treatment.	15512	'Hspa2'	Shared rhythmic genes in ELGs among NC, SiNPs, SD+SiNPs treatments
16182	'Il18r1'	Unique rhythmic genes in ELGs of NC treatment.	16542	Kdr	Unique rhythmic genes in ELGs of SiNPs treatment.	14089	Fap	Unique rhythmic genes in ELGs of SD+SiNPs treatment.	15516	'Hsp90ab1'	Shared rhythmic genes in ELGs among NC, SiNPs, SD+SiNPs treatments
16196	'Il7'	Unique rhythmic genes in ELGs of NC treatment.	16543	Mdfic	Unique rhythmic genes in ELGs of SiNPs treatment.	14104	Fasn	Unique rhythmic genes in ELGs of SD+SiNPs treatment.	15519	'Hsp90aa1'	Shared rhythmic genes in ELGs among NC, SiNPs, SD+SiNPs treatments
16372	'Irx2'	Unique rhythmic genes in ELGs of NC treatment.	16551	Kif11	Unique rhythmic genes in ELGs of SiNPs treatment.	14154	Fem1a	Unique rhythmic genes in ELGs of SD+SiNPs treatment.	15904	'Id4'	Shared rhythmic genes in ELGs among NC, SiNPs, SD+SiNPs treatments
16409	'Itgam'	Unique rhythmic genes in ELGs of NC treatment.	16568	Kif3a	Unique rhythmic genes in ELGs of SiNPs treatment.	14166	Fgf11	Unique rhythmic genes in ELGs of SD+SiNPs treatment.	15944	'Irgm1'	Shared rhythmic genes in ELGs among NC, SiNPs, SD+SiNPs treatments
16419	'Itgb5'	Unique rhythmic genes in ELGs of NC treatment.	16571	Kif4	Unique rhythmic genes in ELGs of SiNPs treatment.	14201	Fhl3	Unique rhythmic genes in ELGs of SD+SiNPs treatment.	15957	'Ifit1'	Shared rhythmic genes in ELGs among NC, SiNPs, SD+SiNPs treatments
16425	'Itih2'	Unique rhythmic genes in ELGs of NC treatment.	16588	Kin	Unique rhythmic genes in ELGs of SiNPs treatment.	14211	Smc2	Unique rhythmic genes in ELGs of SD+SiNPs treatment.	16157	'Il11ra1'	Shared rhythmic genes in ELGs among NC, SiNPs, SD+SiNPs treatments
16439	'Itpr2'	Unique rhythmic genes in ELGs of NC treatment.	16633	Klra2	Unique rhythmic genes in ELGs of SiNPs treatment.	14232	Fkbp8	Unique rhythmic genes in ELGs of SD+SiNPs treatment.	16180	'Il1rap'	Shared rhythmic genes in ELGs among NC, SiNPs, SD+SiNPs treatments
16440	'Itpr3'	Unique rhythmic genes in ELGs of NC treatment.	16639	Klra8	Unique rhythmic genes in ELGs of SiNPs treatment.	14248	Flii	Unique rhythmic genes in ELGs of SD+SiNPs treatment.	16371	'Irx1'	Shared rhythmic genes in ELGs among NC, SiNPs, SD+SiNPs treatments
16476	'Jun'	Unique rhythmic genes in ELGs of NC treatment.	16646	Kpna1	Unique rhythmic genes in ELGs of SiNPs treatment.	14252	Flot2	Unique rhythmic genes in ELGs of SD+SiNPs treatment.	16373	'Irx3'	Shared rhythmic genes in ELGs among NC, SiNPs, SD+SiNPs treatments
16497	'Kcnab1'	Unique rhythmic genes in ELGs of NC treatment.	16647	Kpna2	Unique rhythmic genes in ELGs of SiNPs treatment.	14319	Fth1	Unique rhythmic genes in ELGs of SD+SiNPs treatment.	16391	'Irf9'	Shared rhythmic genes in ELGs among NC, SiNPs, SD+SiNPs treatments
16565	'Kif21b'	Unique rhythmic genes in ELGs of NC treatment.	16649	Kpna4	Unique rhythmic genes in ELGs of SiNPs treatment.	14339	Aktip	Unique rhythmic genes in ELGs of SD+SiNPs treatment.	16531	'Kcnma1'	Shared rhythmic genes in ELGs among NC, SiNPs, SD+SiNPs treatments
16581	'Kifc2'	Unique rhythmic genes in ELGs of NC treatment.	16664	Krt14	Unique rhythmic genes in ELGs of SiNPs treatment.	14348	Fut9	Unique rhythmic genes in ELGs of SD+SiNPs treatment.	16535	'Kcnq1'	Shared rhythmic genes in ELGs among NC, SiNPs, SD+SiNPs treatments
16776	'Lama5'	Unique rhythmic genes in ELGs of NC treatment.	16668	Krt18	Unique rhythmic genes in ELGs of SiNPs treatment.	14359	Fxr1	Unique rhythmic genes in ELGs of SD+SiNPs treatment.	16538	'Kcns1'	Shared rhythmic genes in ELGs among NC, SiNPs, SD+SiNPs treatments
16784	'Lamp2'	Unique rhythmic genes in ELGs of NC treatment.	16763	Lad1	Unique rhythmic genes in ELGs of SiNPs treatment.	14388	Gab1	Unique rhythmic genes in ELGs of SD+SiNPs treatment.	16548	'Khk'	Shared rhythmic genes in ELGs among NC, SiNPs, SD+SiNPs treatments
16795	'Large1'	Unique rhythmic genes in ELGs of NC treatment.	16907	Lmnb2	Unique rhythmic genes in ELGs of SiNPs treatment.	14390	Gabpa	Unique rhythmic genes in ELGs of SD+SiNPs treatment.	16592	'Fabp5'	Shared rhythmic genes in ELGs among NC, SiNPs, SD+SiNPs treatments
16847	'Lepr'	Unique rhythmic genes in ELGs of NC treatment.	16909	Lmo2	Unique rhythmic genes in ELGs of SiNPs treatment.	14428	Galr2	Unique rhythmic genes in ELGs of SD+SiNPs treatment.	16601	'Klf9'	Shared rhythmic genes in ELGs among NC, SiNPs, SD+SiNPs treatments
16855	'Lgals4'	Unique rhythmic genes in ELGs of NC treatment.	17025	Alad	Unique rhythmic genes in ELGs of SiNPs treatment.	14456	Gas6	Unique rhythmic genes in ELGs of SD+SiNPs treatment.	16613	'Klk1b11'	Shared rhythmic genes in ELGs among NC, SiNPs, SD+SiNPs treatments
16880	'Lifr'	Unique rhythmic genes in ELGs of NC treatment.	17067	Ly6c1	Unique rhythmic genes in ELGs of SiNPs treatment.	14600	Ghr	Unique rhythmic genes in ELGs of SD+SiNPs treatment.	16886	'Limk2'	Shared rhythmic genes in ELGs among NC, SiNPs, SD+SiNPs treatments
16889	'Lipa'	Unique rhythmic genes in ELGs of NC treatment.	17071	Ly6f	Unique rhythmic genes in ELGs of SiNPs treatment.	14609	Gja1	Unique rhythmic genes in ELGs of SD+SiNPs treatment.	16911	'Lmo4'	Shared rhythmic genes in ELGs among NC, SiNPs, SD+SiNPs treatments
16891	'Lipg'	Unique rhythmic genes in ELGs of NC treatment.	17110	Lyz1	Unique rhythmic genes in ELGs of SiNPs treatment.	14658	Glrb	Unique rhythmic genes in ELGs of SD+SiNPs treatment.	16918	'Mycl'	Shared rhythmic genes in ELGs among NC, SiNPs, SD+SiNPs treatments
16956	'Lpl'	Unique rhythmic genes in ELGs of NC treatment.	17120	Mad1l1	Unique rhythmic genes in ELGs of SiNPs treatment.	14677	Gnai1	Unique rhythmic genes in ELGs of SD+SiNPs treatment.	16952	'Anxa1'	Shared rhythmic genes in ELGs among NC, SiNPs, SD+SiNPs treatments
16998	'Ltbp3'	Unique rhythmic genes in ELGs of NC treatment.	17131	Smad7	Unique rhythmic genes in ELGs of SiNPs treatment.	14682	Gnaq	Unique rhythmic genes in ELGs of SD+SiNPs treatment.	17125	'Smad1'	Shared rhythmic genes in ELGs among NC, SiNPs, SD+SiNPs treatments
17079	'Cd180'	Unique rhythmic genes in ELGs of NC treatment.	17178	Fxyd3	Unique rhythmic genes in ELGs of SiNPs treatment.	14701	Gng12	Unique rhythmic genes in ELGs of SD+SiNPs treatment.	17160	'Man2b2'	Shared rhythmic genes in ELGs among NC, SiNPs, SD+SiNPs treatments
17117	'Amacr'	Unique rhythmic genes in ELGs of NC treatment.	17256	Mea1	Unique rhythmic genes in ELGs of SiNPs treatment.	14714	Gnrh1	Unique rhythmic genes in ELGs of SD+SiNPs treatment.	17187	'Max'	Shared rhythmic genes in ELGs among NC, SiNPs, SD+SiNPs treatments
17127	'Smad3'	Unique rhythmic genes in ELGs of NC treatment.	17279	Melk	Unique rhythmic genes in ELGs of SiNPs treatment.	14766	Adgrg1	Unique rhythmic genes in ELGs of SD+SiNPs treatment.	17190	'Mbd1'	Shared rhythmic genes in ELGs among NC, SiNPs, SD+SiNPs treatments
17133	'Maff'	Unique rhythmic genes in ELGs of NC treatment.	17314	Mgmt	Unique rhythmic genes in ELGs of SiNPs treatment.	14802	Gria4	Unique rhythmic genes in ELGs of SD+SiNPs treatment.	17191	'Mbd2'	Shared rhythmic genes in ELGs among NC, SiNPs, SD+SiNPs treatments
17149	'Magoh'	Unique rhythmic genes in ELGs of NC treatment.	17345	Mki67	Unique rhythmic genes in ELGs of SiNPs treatment.	14825	Cxcl1	Unique rhythmic genes in ELGs of SD+SiNPs treatment.	17254	'Slc3a2'	Shared rhythmic genes in ELGs among NC, SiNPs, SD+SiNPs treatments
17168	'Nprl3'	Unique rhythmic genes in ELGs of NC treatment.	17350	Mlh1	Unique rhythmic genes in ELGs of SiNPs treatment.	14865	Gstm4	Unique rhythmic genes in ELGs of SD+SiNPs treatment.	17289	'Mertk'	Shared rhythmic genes in ELGs among NC, SiNPs, SD+SiNPs treatments
17196	'Mbp'	Unique rhythmic genes in ELGs of NC treatment.	17357	Marcksl1	Unique rhythmic genes in ELGs of SiNPs treatment.	14866	Gstm5	Unique rhythmic genes in ELGs of SD+SiNPs treatment.	17347	'Mknk2'	Shared rhythmic genes in ELGs among NC, SiNPs, SD+SiNPs treatments
17203	'Mc5r'	Unique rhythmic genes in ELGs of NC treatment.	17391	Mmp24	Unique rhythmic genes in ELGs of SiNPs treatment.	14871	Gstt1	Unique rhythmic genes in ELGs of SD+SiNPs treatment.	17392	'Mmp3'	Shared rhythmic genes in ELGs among NC, SiNPs, SD+SiNPs treatments
17268	'Meis1'	Unique rhythmic genes in ELGs of NC treatment.	17472	Gbp4	Unique rhythmic genes in ELGs of SiNPs treatment.	14886	Gtf2i	Unique rhythmic genes in ELGs of SD+SiNPs treatment.	17434	'Mocs2'	Shared rhythmic genes in ELGs among NC, SiNPs, SD+SiNPs treatments
17308	'Mgat1'	Unique rhythmic genes in ELGs of NC treatment.	17524	Mpp1	Unique rhythmic genes in ELGs of SiNPs treatment.	14924	Magi1	Unique rhythmic genes in ELGs of SD+SiNPs treatment.	17748	'Mt1'	Shared rhythmic genes in ELGs among NC, SiNPs, SD+SiNPs treatments
17355	'Aff1'	Unique rhythmic genes in ELGs of NC treatment.	17764	Mtf1	Unique rhythmic genes in ELGs of SiNPs treatment.	14962	Cfb	Unique rhythmic genes in ELGs of SD+SiNPs treatment.	17768	'Mthfd2'	Shared rhythmic genes in ELGs among NC, SiNPs, SD+SiNPs treatments
17388	'Mmp15'	Unique rhythmic genes in ELGs of NC treatment.	17921	Myo7a	Unique rhythmic genes in ELGs of SiNPs treatment.	14964	H2-D1	Unique rhythmic genes in ELGs of SD+SiNPs treatment.	17826	'Fam89b'	Shared rhythmic genes in ELGs among NC, SiNPs, SD+SiNPs treatments
17428	'Mnt'	Unique rhythmic genes in ELGs of NC treatment.	17984	Ndn	Unique rhythmic genes in ELGs of SiNPs treatment.	15078	H3f3a	Unique rhythmic genes in ELGs of SD+SiNPs treatment.	17938	'Naca'	Shared rhythmic genes in ELGs among NC, SiNPs, SD+SiNPs treatments
17681	'Msc'	Unique rhythmic genes in ELGs of NC treatment.	18005	Nek2	Unique rhythmic genes in ELGs of SiNPs treatment.	15118	Has3	Unique rhythmic genes in ELGs of SD+SiNPs treatment.	17979	'Ncoa3'	Shared rhythmic genes in ELGs among NC, SiNPs, SD+SiNPs treatments
17765	'Mtf2'	Unique rhythmic genes in ELGs of NC treatment.	18008	Nes	Unique rhythmic genes in ELGs of SiNPs treatment.	15183	Hdac3	Unique rhythmic genes in ELGs of SD+SiNPs treatment.	18024	'Nfe2l2'	Shared rhythmic genes in ELGs among NC, SiNPs, SD+SiNPs treatments
17913	'Myo1c'	Unique rhythmic genes in ELGs of NC treatment.	18038	Nfkbil1	Unique rhythmic genes in ELGs of SiNPs treatment.	15191	Hdgf	Unique rhythmic genes in ELGs of SD+SiNPs treatment.	18025	'Nfe2l3'	Shared rhythmic genes in ELGs among NC, SiNPs, SD+SiNPs treatments
17925	'Myo9b'	Unique rhythmic genes in ELGs of NC treatment.	18139	Zfp638	Unique rhythmic genes in ELGs of SiNPs treatment.	15201	Hells	Unique rhythmic genes in ELGs of SD+SiNPs treatment.	18030	'Nfil3'	Shared rhythmic genes in ELGs among NC, SiNPs, SD+SiNPs treatments
17929	'Myom1'	Unique rhythmic genes in ELGs of NC treatment.	18150	Npm3	Unique rhythmic genes in ELGs of SiNPs treatment.	15212	Hexb	Unique rhythmic genes in ELGs of SD+SiNPs treatment.	18044	'Nfya'	Shared rhythmic genes in ELGs among NC, SiNPs, SD+SiNPs treatments
17931	'Ppp1r12a'	Unique rhythmic genes in ELGs of NC treatment.	18163	Ctnnd2	Unique rhythmic genes in ELGs of SiNPs treatment.	15247	Mfsd14a	Unique rhythmic genes in ELGs of SD+SiNPs treatment.	18143	'Npas2'	Shared rhythmic genes in ELGs among NC, SiNPs, SD+SiNPs treatments
17936	'Nab1'	Unique rhythmic genes in ELGs of NC treatment.	18295	Ogn	Unique rhythmic genes in ELGs of SiNPs treatment.	15251	Hif1a	Unique rhythmic genes in ELGs of SD+SiNPs treatment.	18148	'Npm1'	Shared rhythmic genes in ELGs among NC, SiNPs, SD+SiNPs treatments
17961	'Nat2'	Unique rhythmic genes in ELGs of NC treatment.	18400	Slc22a18	Unique rhythmic genes in ELGs of SiNPs treatment.	15257	Hipk1	Unique rhythmic genes in ELGs of SD+SiNPs treatment.	18166	'Npy1r'	Shared rhythmic genes in ELGs among NC, SiNPs, SD+SiNPs treatments
17965	'Nbl1'	Unique rhythmic genes in ELGs of NC treatment.	18439	P2rx7	Unique rhythmic genes in ELGs of SiNPs treatment.	15259	Hipk3	Unique rhythmic genes in ELGs of SD+SiNPs treatment.	18174	'Slc11a2'	Shared rhythmic genes in ELGs among NC, SiNPs, SD+SiNPs treatments
17970	'Ncf2'	Unique rhythmic genes in ELGs of NC treatment.	18476	Pafah1b3	Unique rhythmic genes in ELGs of SiNPs treatment.	15289	Hmgb1	Unique rhythmic genes in ELGs of SD+SiNPs treatment.	18208	'Ntn1'	Shared rhythmic genes in ELGs among NC, SiNPs, SD+SiNPs treatments
17978	'Ncoa2'	Unique rhythmic genes in ELGs of NC treatment.	18584	Pde8a	Unique rhythmic genes in ELGs of SiNPs treatment.	15312	Hmgn1	Unique rhythmic genes in ELGs of SD+SiNPs treatment.	18286	'Odf2'	Shared rhythmic genes in ELGs among NC, SiNPs, SD+SiNPs treatments
18010	'Neu1'	Unique rhythmic genes in ELGs of NC treatment.	18637	Pfdn2	Unique rhythmic genes in ELGs of SiNPs treatment.	15368	Hmox1	Unique rhythmic genes in ELGs of SD+SiNPs treatment.	18378	'Omp'	Shared rhythmic genes in ELGs among NC, SiNPs, SD+SiNPs treatments
18018	'Nfatc1'	Unique rhythmic genes in ELGs of NC treatment.	18671	Abcb1a	Unique rhythmic genes in ELGs of SiNPs treatment.	15375	Foxa1	Unique rhythmic genes in ELGs of SD+SiNPs treatment.	18415	'Hspa4l'	Shared rhythmic genes in ELGs among NC, SiNPs, SD+SiNPs treatments
18034	'Nfkb2'	Unique rhythmic genes in ELGs of NC treatment.	18705	Pik3c2g	Unique rhythmic genes in ELGs of SiNPs treatment.	15384	Hnrnpab	Unique rhythmic genes in ELGs of SD+SiNPs treatment.	18451	'P4ha1'	Shared rhythmic genes in ELGs among NC, SiNPs, SD+SiNPs treatments
18046	'Nfyc'	Unique rhythmic genes in ELGs of NC treatment.	18786	Plaa	Unique rhythmic genes in ELGs of SiNPs treatment.	15439	Hp	Unique rhythmic genes in ELGs of SD+SiNPs treatment.	18458	'Pabpc1'	Shared rhythmic genes in ELGs among NC, SiNPs, SD+SiNPs treatments
18074	'Nid2'	Unique rhythmic genes in ELGs of NC treatment.	18817	Plk1	Unique rhythmic genes in ELGs of SiNPs treatment.	15446	Hpgd	Unique rhythmic genes in ELGs of SD+SiNPs treatment.	18521	'Pcbp2'	Shared rhythmic genes in ELGs among NC, SiNPs, SD+SiNPs treatments
18081	'Ninj1'	Unique rhythmic genes in ELGs of NC treatment.	18824	Plp2	Unique rhythmic genes in ELGs of SiNPs treatment.	15451	Hpn	Unique rhythmic genes in ELGs of SD+SiNPs treatment.	18555	'Cdk16'	Shared rhythmic genes in ELGs among NC, SiNPs, SD+SiNPs treatments
18087	'Nktr'	Unique rhythmic genes in ELGs of NC treatment.	18828	Plscr2	Unique rhythmic genes in ELGs of SiNPs treatment.	15468	Prmt2	Unique rhythmic genes in ELGs of SD+SiNPs treatment.	18569	'Pdcd4'	Shared rhythmic genes in ELGs among NC, SiNPs, SD+SiNPs treatments
18105	'Nqo2'	Unique rhythmic genes in ELGs of NC treatment.	18951	Septin5	Unique rhythmic genes in ELGs of SiNPs treatment.	15499	Hsf1	Unique rhythmic genes in ELGs of SD+SiNPs treatment.	18626	'Per1'	Shared rhythmic genes in ELGs among NC, SiNPs, SD+SiNPs treatments
18108	'Nmt2'	Unique rhythmic genes in ELGs of NC treatment.	18972	Pold2	Unique rhythmic genes in ELGs of SiNPs treatment.	15902	Id2	Unique rhythmic genes in ELGs of SD+SiNPs treatment.	18627	'Per2'	Shared rhythmic genes in ELGs among NC, SiNPs, SD+SiNPs treatments
18145	'Npc1'	Unique rhythmic genes in ELGs of NC treatment.	19009	Pou6f1	Unique rhythmic genes in ELGs of SiNPs treatment.	15950	Ifi203	Unique rhythmic genes in ELGs of SD+SiNPs treatment.	18628	'Per3'	Shared rhythmic genes in ELGs among NC, SiNPs, SD+SiNPs treatments
18193	'Nsd1'	Unique rhythmic genes in ELGs of NC treatment.	19012	Plpp1	Unique rhythmic genes in ELGs of SiNPs treatment.	15980	Ifngr2	Unique rhythmic genes in ELGs of SD+SiNPs treatment.	18654	'Pgf'	Shared rhythmic genes in ELGs among NC, SiNPs, SD+SiNPs treatments
18218	'Dusp8'	Unique rhythmic genes in ELGs of NC treatment.	19039	Lgals3bp	Unique rhythmic genes in ELGs of SiNPs treatment.	15983	Ifrd2	Unique rhythmic genes in ELGs of SD+SiNPs treatment.	18703	'Pigr'	Shared rhythmic genes in ELGs among NC, SiNPs, SD+SiNPs treatments
18242	'Oat'	Unique rhythmic genes in ELGs of NC treatment.	19126	Prom1	Unique rhythmic genes in ELGs of SiNPs treatment.	16068	Il18bp	Unique rhythmic genes in ELGs of SD+SiNPs treatment.	18803	'Plcg1'	Shared rhythmic genes in ELGs among NC, SiNPs, SD+SiNPs treatments
18479	'Pak1'	Unique rhythmic genes in ELGs of NC treatment.	19165	Psen2	Unique rhythmic genes in ELGs of SiNPs treatment.	16069	Jchain	Unique rhythmic genes in ELGs of SD+SiNPs treatment.	18970	'Polb'	Shared rhythmic genes in ELGs among NC, SiNPs, SD+SiNPs treatments
18514	'Pbx1'	Unique rhythmic genes in ELGs of NC treatment.	19182	Psmc3	Unique rhythmic genes in ELGs of SiNPs treatment.	16160	Il12b	Unique rhythmic genes in ELGs of SD+SiNPs treatment.	18984	'Por'	Shared rhythmic genes in ELGs among NC, SiNPs, SD+SiNPs treatments
18518	'Igbp1'	Unique rhythmic genes in ELGs of NC treatment.	19188	Psme2	Unique rhythmic genes in ELGs of SiNPs treatment.	16164	Il13ra1	Unique rhythmic genes in ELGs of SD+SiNPs treatment.	19024	'Ppfibp2'	Shared rhythmic genes in ELGs among NC, SiNPs, SD+SiNPs treatments
18551	'Pcsk4'	Unique rhythmic genes in ELGs of NC treatment.	19249	Ptpn13	Unique rhythmic genes in ELGs of SiNPs treatment.	16185	Il2rb	Unique rhythmic genes in ELGs of SD+SiNPs treatment.	19049	'Ppp1r1b'	Shared rhythmic genes in ELGs among NC, SiNPs, SD+SiNPs treatments
18559	'Pctp'	Unique rhythmic genes in ELGs of NC treatment.	19263	Ptprb	Unique rhythmic genes in ELGs of SiNPs treatment.	16194	Il6ra	Unique rhythmic genes in ELGs of SD+SiNPs treatment.	19053	'Ppp2cb'	Shared rhythmic genes in ELGs among NC, SiNPs, SD+SiNPs treatments
18612	'Etv4'	Unique rhythmic genes in ELGs of NC treatment.	19336	Rab24	Unique rhythmic genes in ELGs of SiNPs treatment.	16330	Inpp5b	Unique rhythmic genes in ELGs of SD+SiNPs treatment.	19125	'Prodh'	Shared rhythmic genes in ELGs among NC, SiNPs, SD+SiNPs treatments
18618	'Pemt'	Unique rhythmic genes in ELGs of NC treatment.	19387	Rangap1	Unique rhythmic genes in ELGs of SiNPs treatment.	16331	Inpp5d	Unique rhythmic genes in ELGs of SD+SiNPs treatment.	19201	'Pstpip2'	Shared rhythmic genes in ELGs among NC, SiNPs, SD+SiNPs treatments
18631	'Pex11a'	Unique rhythmic genes in ELGs of NC treatment.	19416	Rasd1	Unique rhythmic genes in ELGs of SiNPs treatment.	16407	Itgae	Unique rhythmic genes in ELGs of SD+SiNPs treatment.	19294	'Nectin2'	Shared rhythmic genes in ELGs among NC, SiNPs, SD+SiNPs treatments
18639	'Pfkfb1'	Unique rhythmic genes in ELGs of NC treatment.	19659	Rbp1	Unique rhythmic genes in ELGs of SiNPs treatment.	16451	Jak1	Unique rhythmic genes in ELGs of SD+SiNPs treatment.	19341	'Rab4a'	Shared rhythmic genes in ELGs among NC, SiNPs, SD+SiNPs treatments
18640	'Pfkfb2'	Unique rhythmic genes in ELGs of NC treatment.	19726	Rfx3	Unique rhythmic genes in ELGs of SiNPs treatment.	16480	Jup	Unique rhythmic genes in ELGs of SD+SiNPs treatment.	19652	'Rbm3'	Shared rhythmic genes in ELGs among NC, SiNPs, SD+SiNPs treatments
18712	'Pim1'	Unique rhythmic genes in ELGs of NC treatment.	19727	Rfxank	Unique rhythmic genes in ELGs of SiNPs treatment.	16516	Kcnj15	Unique rhythmic genes in ELGs of SD+SiNPs treatment.	19655	'Rbmx'	Shared rhythmic genes in ELGs among NC, SiNPs, SD+SiNPs treatments
18797	'Plcb3'	Unique rhythmic genes in ELGs of NC treatment.	19729	Slc50a1	Unique rhythmic genes in ELGs of SiNPs treatment.	16536	Kcnq2	Unique rhythmic genes in ELGs of SD+SiNPs treatment.	19699	'Reln'	Shared rhythmic genes in ELGs among NC, SiNPs, SD+SiNPs treatments
18823	'Plp1'	Unique rhythmic genes in ELGs of NC treatment.	19763	Ring1	Unique rhythmic genes in ELGs of SiNPs treatment.	16561	Kif1b	Unique rhythmic genes in ELGs of SD+SiNPs treatment.	19704	'Upf1'	Shared rhythmic genes in ELGs among NC, SiNPs, SD+SiNPs treatments
18986	'Pou2f1'	Unique rhythmic genes in ELGs of NC treatment.	19982	Rpl36a	Unique rhythmic genes in ELGs of SiNPs treatment.	16562	Kif1c	Unique rhythmic genes in ELGs of SD+SiNPs treatment.	19885	'Rorc'	Shared rhythmic genes in ELGs among NC, SiNPs, SD+SiNPs treatments
19015	'Ppard'	Unique rhythmic genes in ELGs of NC treatment.	20018	Polr1d	Unique rhythmic genes in ELGs of SiNPs treatment.	16593	Klc1	Unique rhythmic genes in ELGs of SD+SiNPs treatment.	19934	'Rpl22'	Shared rhythmic genes in ELGs among NC, SiNPs, SD+SiNPs treatments
19025	'Ctsa'	Unique rhythmic genes in ELGs of NC treatment.	20021	Polr2c	Unique rhythmic genes in ELGs of SiNPs treatment.	16596	Klf1	Unique rhythmic genes in ELGs of SD+SiNPs treatment.	20226	'Sars'	Shared rhythmic genes in ELGs among NC, SiNPs, SD+SiNPs treatments
19091	'Prkg1'	Unique rhythmic genes in ELGs of NC treatment.	20068	Rps17	Unique rhythmic genes in ELGs of SiNPs treatment.	16612	Klk1	Unique rhythmic genes in ELGs of SD+SiNPs treatment.	20249	'Scd1'	Shared rhythmic genes in ELGs among NC, SiNPs, SD+SiNPs treatments
19155	'Npepps'	Unique rhythmic genes in ELGs of NC treatment.	20130	Rras	Unique rhythmic genes in ELGs of SiNPs treatment.	16653	Kras	Unique rhythmic genes in ELGs of SD+SiNPs treatment.	20293	'Ccl12'	Shared rhythmic genes in ELGs among NC, SiNPs, SD+SiNPs treatments
19159	'Cyth3'	Unique rhythmic genes in ELGs of NC treatment.	20148	Dhrs3	Unique rhythmic genes in ELGs of SiNPs treatment.	16658	Mafb	Unique rhythmic genes in ELGs of SD+SiNPs treatment.	20311	'Cxcl5'	Shared rhythmic genes in ELGs among NC, SiNPs, SD+SiNPs treatments
19167	'Psma3'	Unique rhythmic genes in ELGs of NC treatment.	20184	Uimc1	Unique rhythmic genes in ELGs of SiNPs treatment.	16667	Krt17	Unique rhythmic genes in ELGs of SD+SiNPs treatment.	20338	'Sel1l'	Shared rhythmic genes in ELGs among NC, SiNPs, SD+SiNPs treatments
19206	'Ptch1'	Unique rhythmic genes in ELGs of NC treatment.	20315	Cxcl12	Unique rhythmic genes in ELGs of SiNPs treatment.	16774	Lama3	Unique rhythmic genes in ELGs of SD+SiNPs treatment.	20341	'Selenbp1'	Shared rhythmic genes in ELGs among NC, SiNPs, SD+SiNPs treatments
19246	'Ptpn1'	Unique rhythmic genes in ELGs of NC treatment.	20324	Cavin2	Unique rhythmic genes in ELGs of SiNPs treatment.	16792	Laptm5	Unique rhythmic genes in ELGs of SD+SiNPs treatment.	20351	'Sema4a'	Shared rhythmic genes in ELGs among NC, SiNPs, SD+SiNPs treatments
19252	'Dusp1'	Unique rhythmic genes in ELGs of NC treatment.	20333	Sec22b	Unique rhythmic genes in ELGs of SiNPs treatment.	16820	Lcn3	Unique rhythmic genes in ELGs of SD+SiNPs treatment.	20382	'Srsf2'	Shared rhythmic genes in ELGs among NC, SiNPs, SD+SiNPs treatments
19267	'Ptpre'	Unique rhythmic genes in ELGs of NC treatment.	20348	Sema3c	Unique rhythmic genes in ELGs of SiNPs treatment.	16832	Ldhb	Unique rhythmic genes in ELGs of SD+SiNPs treatment.	20383	'Srsf3'	Shared rhythmic genes in ELGs among NC, SiNPs, SD+SiNPs treatments
19273	'Ptpru'	Unique rhythmic genes in ELGs of NC treatment.	20384	Srsf5	Unique rhythmic genes in ELGs of SiNPs treatment.	16881	Lig1	Unique rhythmic genes in ELGs of SD+SiNPs treatment.	20495	'Slc12a1'	Shared rhythmic genes in ELGs among NC, SiNPs, SD+SiNPs treatments
19290	'Pura'	Unique rhythmic genes in ELGs of NC treatment.	20402	Zfp106	Unique rhythmic genes in ELGs of SiNPs treatment.	16922	Phyh	Unique rhythmic genes in ELGs of SD+SiNPs treatment.	20540	'Slc7a7'	Shared rhythmic genes in ELGs among NC, SiNPs, SD+SiNPs treatments
19326	'Rab11b'	Unique rhythmic genes in ELGs of NC treatment.	20439	Siah2	Unique rhythmic genes in ELGs of SiNPs treatment.	16985	Lsp1	Unique rhythmic genes in ELGs of SD+SiNPs treatment.	20708	'Serpinb6b'	Shared rhythmic genes in ELGs among NC, SiNPs, SD+SiNPs treatments
19355	'Rad1'	Unique rhythmic genes in ELGs of NC treatment.	20444	St3gal2	Unique rhythmic genes in ELGs of SiNPs treatment.	17002	Ltf	Unique rhythmic genes in ELGs of SD+SiNPs treatment.	20810	'Srm'	Shared rhythmic genes in ELGs among NC, SiNPs, SD+SiNPs treatments
19376	'Rab34'	Unique rhythmic genes in ELGs of NC treatment.	20462	Tra2b	Unique rhythmic genes in ELGs of SiNPs treatment.	17005	Ltk	Unique rhythmic genes in ELGs of SD+SiNPs treatment.	20822	'Ro60'	Shared rhythmic genes in ELGs among NC, SiNPs, SD+SiNPs treatments
19377	'Rai1'	Unique rhythmic genes in ELGs of NC treatment.	20472	Six2	Unique rhythmic genes in ELGs of SiNPs treatment.	17068	Ly6d	Unique rhythmic genes in ELGs of SD+SiNPs treatment.	20846	'Stat1'	Shared rhythmic genes in ELGs among NC, SiNPs, SD+SiNPs treatments
19419	'Rasgrp1'	Unique rhythmic genes in ELGs of NC treatment.	20498	Slc12a4	Unique rhythmic genes in ELGs of SiNPs treatment.	17075	Epcam	Unique rhythmic genes in ELGs of SD+SiNPs treatment.	20847	'Stat2'	Shared rhythmic genes in ELGs among NC, SiNPs, SD+SiNPs treatments
19656	'Rbmxl1'	Unique rhythmic genes in ELGs of NC treatment.	20522	Slc23a1	Unique rhythmic genes in ELGs of SiNPs treatment.	17085	Ly9	Unique rhythmic genes in ELGs of SD+SiNPs treatment.	20867	'Stip1'	Shared rhythmic genes in ELGs among NC, SiNPs, SD+SiNPs treatments
19663	'Rbpms'	Unique rhythmic genes in ELGs of NC treatment.	20536	Slc4a3	Unique rhythmic genes in ELGs of SiNPs treatment.	17105	Lyz2	Unique rhythmic genes in ELGs of SD+SiNPs treatment.	20918	'Eif1'	Shared rhythmic genes in ELGs among NC, SiNPs, SD+SiNPs treatments
19664	'Rbpj'	Unique rhythmic genes in ELGs of NC treatment.	20538	Slc6a2	Unique rhythmic genes in ELGs of SiNPs treatment.	17126	Smad2	Unique rhythmic genes in ELGs of SD+SiNPs treatment.	20971	'Sdc4'	Shared rhythmic genes in ELGs among NC, SiNPs, SD+SiNPs treatments
19679	'Pitpnm2'	Unique rhythmic genes in ELGs of NC treatment.	20556	Slfn2	Unique rhythmic genes in ELGs of SiNPs treatment.	17156	Man1a2	Unique rhythmic genes in ELGs of SD+SiNPs treatment.	20973	'Syngr2'	Shared rhythmic genes in ELGs among NC, SiNPs, SD+SiNPs treatments
19696	'Rel'	Unique rhythmic genes in ELGs of NC treatment.	20599	Smr3a	Unique rhythmic genes in ELGs of SiNPs treatment.	17184	Matr3	Unique rhythmic genes in ELGs of SD+SiNPs treatment.	21338	'Tacr3'	Shared rhythmic genes in ELGs among NC, SiNPs, SD+SiNPs treatments
19707	'Reps1'	Unique rhythmic genes in ELGs of NC treatment.	20602	Ncor2	Unique rhythmic genes in ELGs of SiNPs treatment.	17215	Mcm3	Unique rhythmic genes in ELGs of SD+SiNPs treatment.	21340	'Taf1b'	Shared rhythmic genes in ELGs among NC, SiNPs, SD+SiNPs treatments
19714	'Rev3l'	Unique rhythmic genes in ELGs of NC treatment.	20630	Snrpc	Unique rhythmic genes in ELGs of SiNPs treatment.	17216	Mcm2	Unique rhythmic genes in ELGs of SD+SiNPs treatment.	21353	'Tank'	Shared rhythmic genes in ELGs among NC, SiNPs, SD+SiNPs treatments
19730	'Ralgds'	Unique rhythmic genes in ELGs of NC treatment.	20643	Snrpe	Unique rhythmic genes in ELGs of SiNPs treatment.	17217	Mcm4	Unique rhythmic genes in ELGs of SD+SiNPs treatment.	21425	'Tfeb'	Shared rhythmic genes in ELGs among NC, SiNPs, SD+SiNPs treatments
19735	'Rgs2'	Unique rhythmic genes in ELGs of NC treatment.	20667	Sox12	Unique rhythmic genes in ELGs of SiNPs treatment.	17218	Mcm5	Unique rhythmic genes in ELGs of SD+SiNPs treatment.	21685	'Tef'	Shared rhythmic genes in ELGs among NC, SiNPs, SD+SiNPs treatments
19769	'Rit1'	Unique rhythmic genes in ELGs of NC treatment.	20671	Sox17	Unique rhythmic genes in ELGs of SiNPs treatment.	17219	Mcm6	Unique rhythmic genes in ELGs of SD+SiNPs treatment.	21743	'Inmt'	Shared rhythmic genes in ELGs among NC, SiNPs, SD+SiNPs treatments
19777	'Uri1'	Unique rhythmic genes in ELGs of NC treatment.	20700	Serpina1a	Unique rhythmic genes in ELGs of SiNPs treatment.	17237	Mgrn1	Unique rhythmic genes in ELGs of SD+SiNPs treatment.	21808	'Tgfb2'	Shared rhythmic genes in ELGs among NC, SiNPs, SD+SiNPs treatments
19893	'Rpgr'	Unique rhythmic genes in ELGs of NC treatment.	20717	Serpina3m	Unique rhythmic genes in ELGs of SiNPs treatment.	17274	Rab8a	Unique rhythmic genes in ELGs of SD+SiNPs treatment.	21833	'Thra'	Shared rhythmic genes in ELGs among NC, SiNPs, SD+SiNPs treatments
20111	'Rps6ka1'	Unique rhythmic genes in ELGs of NC treatment.	20733	Spint2	Unique rhythmic genes in ELGs of SiNPs treatment.	17380	Mme	Unique rhythmic genes in ELGs of SD+SiNPs treatment.	21848	'Trim24'	Shared rhythmic genes in ELGs among NC, SiNPs, SD+SiNPs treatments
20306	'Ccl7'	Unique rhythmic genes in ELGs of NC treatment.	20818	Srprb	Unique rhythmic genes in ELGs of SiNPs treatment.	17423	Ndst2	Unique rhythmic genes in ELGs of SD+SiNPs treatment.	21859	'Timp3'	Shared rhythmic genes in ELGs among NC, SiNPs, SD+SiNPs treatments
20321	'Frrs1'	Unique rhythmic genes in ELGs of NC treatment.	20877	Aurkb	Unique rhythmic genes in ELGs of SiNPs treatment.	17448	Mdh2	Unique rhythmic genes in ELGs of SD+SiNPs treatment.	21987	'Tpd52l1'	Shared rhythmic genes in ELGs among NC, SiNPs, SD+SiNPs treatments
20352	'Sema4b'	Unique rhythmic genes in ELGs of NC treatment.	20913	Stxbp4	Unique rhythmic genes in ELGs of SiNPs treatment.	17474	Clec4d	Unique rhythmic genes in ELGs of SD+SiNPs treatment.	22036	'Traip'	Shared rhythmic genes in ELGs among NC, SiNPs, SD+SiNPs treatments
20353	'Sema4c'	Unique rhythmic genes in ELGs of NC treatment.	20922	Supt4a	Unique rhythmic genes in ELGs of SiNPs treatment.	17535	Mre11a	Unique rhythmic genes in ELGs of SD+SiNPs treatment.	22142	'Tuba1a'	Shared rhythmic genes in ELGs among NC, SiNPs, SD+SiNPs treatments
20354	'Sema4d'	Unique rhythmic genes in ELGs of NC treatment.	20931	Surf2	Unique rhythmic genes in ELGs of SiNPs treatment.	17536	Meis2	Unique rhythmic genes in ELGs of SD+SiNPs treatment.	22145	'Tuba4a'	Shared rhythmic genes in ELGs among NC, SiNPs, SD+SiNPs treatments
20403	'Itsn2'	Unique rhythmic genes in ELGs of NC treatment.	21335	Tacc3	Unique rhythmic genes in ELGs of SiNPs treatment.	17685	Msh2	Unique rhythmic genes in ELGs of SD+SiNPs treatment.	22151	'Tubb2a'	Shared rhythmic genes in ELGs among NC, SiNPs, SD+SiNPs treatments
20430	'Cyfip1'	Unique rhythmic genes in ELGs of NC treatment.	21384	Tbx15	Unique rhythmic genes in ELGs of SiNPs treatment.	17713	Grpel1	Unique rhythmic genes in ELGs of SD+SiNPs treatment.	22187	'Ubb'	Shared rhythmic genes in ELGs among NC, SiNPs, SD+SiNPs treatments
20437	'Siah1a'	Unique rhythmic genes in ELGs of NC treatment.	21401	Tcea3	Unique rhythmic genes in ELGs of SiNPs treatment.	17762	Mapt	Unique rhythmic genes in ELGs of SD+SiNPs treatment.	22213	'Ube2g2'	Shared rhythmic genes in ELGs among NC, SiNPs, SD+SiNPs treatments
20467	'Sin3b'	Unique rhythmic genes in ELGs of NC treatment.	21420	Tfap2c	Unique rhythmic genes in ELGs of SiNPs treatment.	17766	Nudt1	Unique rhythmic genes in ELGs of SD+SiNPs treatment.	22218	'Sumo1'	Shared rhythmic genes in ELGs among NC, SiNPs, SD+SiNPs treatments
20474	'Six4'	Unique rhythmic genes in ELGs of NC treatment.	21652	Phf1	Unique rhythmic genes in ELGs of SiNPs treatment.	17841	Mup2	Unique rhythmic genes in ELGs of SD+SiNPs treatment.	22240	'Dpysl3'	Shared rhythmic genes in ELGs among NC, SiNPs, SD+SiNPs treatments
20482	'Skil'	Unique rhythmic genes in ELGs of NC treatment.	21678	Tead3	Unique rhythmic genes in ELGs of SiNPs treatment.	17842	Mup3	Unique rhythmic genes in ELGs of SD+SiNPs treatment.	22275	'Urod'	Shared rhythmic genes in ELGs among NC, SiNPs, SD+SiNPs treatments
20515	'Slc20a1'	Unique rhythmic genes in ELGs of NC treatment.	21687	Tek	Unique rhythmic genes in ELGs of SiNPs treatment.	17843	Mup4	Unique rhythmic genes in ELGs of SD+SiNPs treatment.	22320	'Vamp8'	Shared rhythmic genes in ELGs among NC, SiNPs, SD+SiNPs treatments
20516	'Slc20a2'	Unique rhythmic genes in ELGs of NC treatment.	21763	Tex2	Unique rhythmic genes in ELGs of SiNPs treatment.	17916	Myo1f	Unique rhythmic genes in ELGs of SD+SiNPs treatment.	22321	'Vars'	Shared rhythmic genes in ELGs among NC, SiNPs, SD+SiNPs treatments
20530	'Slc31a2'	Unique rhythmic genes in ELGs of NC treatment.	21767	Tex264	Unique rhythmic genes in ELGs of SiNPs treatment.	17919	Myo5b	Unique rhythmic genes in ELGs of SD+SiNPs treatment.	22325	'Vav2'	Shared rhythmic genes in ELGs among NC, SiNPs, SD+SiNPs treatments
20531	'Slc34a2'	Unique rhythmic genes in ELGs of NC treatment.	21824	Thbd	Unique rhythmic genes in ELGs of SiNPs treatment.	17955	Nap1l4	Unique rhythmic genes in ELGs of SD+SiNPs treatment.	22333	'Vdac1'	Shared rhythmic genes in ELGs among NC, SiNPs, SD+SiNPs treatments
20682	'Sox9'	Unique rhythmic genes in ELGs of NC treatment.	21871	Atp6v0a2	Unique rhythmic genes in ELGs of SiNPs treatment.	17969	Ncf1	Unique rhythmic genes in ELGs of SD+SiNPs treatment.	22334	'Vdac2'	Shared rhythmic genes in ELGs among NC, SiNPs, SD+SiNPs treatments
20725	'Serpinb8'	Unique rhythmic genes in ELGs of NC treatment.	21927	Tnfaip1	Unique rhythmic genes in ELGs of SiNPs treatment.	17997	Nedd1	Unique rhythmic genes in ELGs of SD+SiNPs treatment.	22359	'Vldlr'	Shared rhythmic genes in ELGs among NC, SiNPs, SD+SiNPs treatments
20842	'Stag1'	Unique rhythmic genes in ELGs of NC treatment.	21955	Tnnt1	Unique rhythmic genes in ELGs of SiNPs treatment.	18002	Nedd8	Unique rhythmic genes in ELGs of SD+SiNPs treatment.	22388	'Wdr1'	Shared rhythmic genes in ELGs among NC, SiNPs, SD+SiNPs treatments
20850	'Stat5a'	Unique rhythmic genes in ELGs of NC treatment.	21969	Top1	Unique rhythmic genes in ELGs of SiNPs treatment.	18015	Nf1	Unique rhythmic genes in ELGs of SD+SiNPs treatment.	22428	'Dctn6'	Shared rhythmic genes in ELGs among NC, SiNPs, SD+SiNPs treatments
20852	'Stat6'	Unique rhythmic genes in ELGs of NC treatment.	21973	Top2a	Unique rhythmic genes in ELGs of SiNPs treatment.	18028	Nfib	Unique rhythmic genes in ELGs of SD+SiNPs treatment.	22590	'Xpa'	Shared rhythmic genes in ELGs among NC, SiNPs, SD+SiNPs treatments
20911	'Stxbp2'	Unique rhythmic genes in ELGs of NC treatment.	22004	Tpm2	Unique rhythmic genes in ELGs of SiNPs treatment.	18045	Nfyb	Unique rhythmic genes in ELGs of SD+SiNPs treatment.	22592	'Ercc5'	Shared rhythmic genes in ELGs among NC, SiNPs, SD+SiNPs treatments
20935	'Surf6'	Unique rhythmic genes in ELGs of NC treatment.	22061	Trp63	Unique rhythmic genes in ELGs of SiNPs treatment.	18092	Nkx2-6	Unique rhythmic genes in ELGs of SD+SiNPs treatment.	22643	'Zfp101'	Shared rhythmic genes in ELGs among NC, SiNPs, SD+SiNPs treatments
20937	'Suv39h1'	Unique rhythmic genes in ELGs of NC treatment.	22065	Trpc3	Unique rhythmic genes in ELGs of SiNPs treatment.	18100	Mrpl40	Unique rhythmic genes in ELGs of SD+SiNPs treatment.	22644	'Rnf103'	Shared rhythmic genes in ELGs among NC, SiNPs, SD+SiNPs treatments
20981	'Syt3'	Unique rhythmic genes in ELGs of NC treatment.	22121	Rpl13a	Unique rhythmic genes in ELGs of SiNPs treatment.	18104	Nqo1	Unique rhythmic genes in ELGs of SD+SiNPs treatment.	22673	'Zfp185'	Shared rhythmic genes in ELGs among NC, SiNPs, SD+SiNPs treatments
21351	'Taldo1'	Unique rhythmic genes in ELGs of NC treatment.	22137	Ttk	Unique rhythmic genes in ELGs of SiNPs treatment.	18124	Nr4a3	Unique rhythmic genes in ELGs of SD+SiNPs treatment.	23794	'Adamts5'	Shared rhythmic genes in ELGs among NC, SiNPs, SD+SiNPs treatments
21354	'Tap1'	Unique rhythmic genes in ELGs of NC treatment.	22163	Tnfrsf4	Unique rhythmic genes in ELGs of SiNPs treatment.	18128	Notch1	Unique rhythmic genes in ELGs of SD+SiNPs treatment.	23795	'Agr2'	Shared rhythmic genes in ELGs among NC, SiNPs, SD+SiNPs treatments
21413	'Tcf4'	Unique rhythmic genes in ELGs of NC treatment.	22232	Slc35a2	Unique rhythmic genes in ELGs of SiNPs treatment.	18132	Notch4	Unique rhythmic genes in ELGs of SD+SiNPs treatment.	23945	'Mgll'	Shared rhythmic genes in ELGs among NC, SiNPs, SD+SiNPs treatments
21423	'Tcf3'	Unique rhythmic genes in ELGs of NC treatment.	22262	Uox	Unique rhythmic genes in ELGs of SiNPs treatment.	18140	Uhrf1	Unique rhythmic genes in ELGs of SD+SiNPs treatment.	23950	'Dnajb6'	Shared rhythmic genes in ELGs among NC, SiNPs, SD+SiNPs treatments
21429	'Ubtf'	Unique rhythmic genes in ELGs of NC treatment.	22276	Uros	Unique rhythmic genes in ELGs of SiNPs treatment.	18194	Nsdhl	Unique rhythmic genes in ELGs of SD+SiNPs treatment.	23970	'Pacsin2'	Shared rhythmic genes in ELGs among NC, SiNPs, SD+SiNPs treatments
21648	'Dynlt1b'	Unique rhythmic genes in ELGs of NC treatment.	22377	Wbp1	Unique rhythmic genes in ELGs of SiNPs treatment.	18212	Ntrk2	Unique rhythmic genes in ELGs of SD+SiNPs treatment.	23983	'Pcbp1'	Shared rhythmic genes in ELGs among NC, SiNPs, SD+SiNPs treatments
21769	'Zfand3'	Unique rhythmic genes in ELGs of NC treatment.	22420	Wnt6	Unique rhythmic genes in ELGs of SiNPs treatment.	18226	Nup62	Unique rhythmic genes in ELGs of SD+SiNPs treatment.	23986	'Eci2'	Shared rhythmic genes in ELGs among NC, SiNPs, SD+SiNPs treatments
21810	'Tgfbi'	Unique rhythmic genes in ELGs of NC treatment.	22439	Xk	Unique rhythmic genes in ELGs of SiNPs treatment.	18260	Ocln	Unique rhythmic genes in ELGs of SD+SiNPs treatment.	23992	'Prkra'	Shared rhythmic genes in ELGs among NC, SiNPs, SD+SiNPs treatments
21856	'Timm44'	Unique rhythmic genes in ELGs of NC treatment.	22628	Ywhag	Unique rhythmic genes in ELGs of SiNPs treatment.	18484	Pam	Unique rhythmic genes in ELGs of SD+SiNPs treatment.	23994	'Dazap2'	Shared rhythmic genes in ELGs among NC, SiNPs, SD+SiNPs treatments
21906	'Otop1'	Unique rhythmic genes in ELGs of NC treatment.	22642	Zbtb17	Unique rhythmic genes in ELGs of SiNPs treatment.	18537	Pcmt1	Unique rhythmic genes in ELGs of SD+SiNPs treatment.	24057	'Sh3yl1'	Shared rhythmic genes in ELGs among NC, SiNPs, SD+SiNPs treatments
21934	'Tnfrsf11a'	Unique rhythmic genes in ELGs of NC treatment.	22661	Zfp148	Unique rhythmic genes in ELGs of SiNPs treatment.	18538	Pcna	Unique rhythmic genes in ELGs of SD+SiNPs treatment.	24070	'Mpdu1'	Shared rhythmic genes in ELGs among NC, SiNPs, SD+SiNPs treatments
21968	'Tom1'	Unique rhythmic genes in ELGs of NC treatment.	22689	Zfp27	Unique rhythmic genes in ELGs of SiNPs treatment.	18546	Pcp4	Unique rhythmic genes in ELGs of SD+SiNPs treatment.	24110	'Usp18'	Shared rhythmic genes in ELGs among NC, SiNPs, SD+SiNPs treatments
22022	'Tpst2'	Unique rhythmic genes in ELGs of NC treatment.	22694	Zfp35	Unique rhythmic genes in ELGs of SiNPs treatment.	18563	Pcx	Unique rhythmic genes in ELGs of SD+SiNPs treatment.	26358	'Aldh1a7'	Shared rhythmic genes in ELGs among NC, SiNPs, SD+SiNPs treatments
22042	'Tfrc'	Unique rhythmic genes in ELGs of NC treatment.	22696	Zfp37	Unique rhythmic genes in ELGs of SiNPs treatment.	18582	Pde6d	Unique rhythmic genes in ELGs of SD+SiNPs treatment.	26410	'Map3k8'	Shared rhythmic genes in ELGs among NC, SiNPs, SD+SiNPs treatments
22057	'Tob1'	Unique rhythmic genes in ELGs of NC treatment.	22700	Zfp40	Unique rhythmic genes in ELGs of SiNPs treatment.	18597	Pdha1	Unique rhythmic genes in ELGs of SD+SiNPs treatment.	26456	'Sema4g'	Shared rhythmic genes in ELGs among NC, SiNPs, SD+SiNPs treatments
22139	'Ttr'	Unique rhythmic genes in ELGs of NC treatment.	22720	Zfp62	Unique rhythmic genes in ELGs of SiNPs treatment.	18611	Pea15a	Unique rhythmic genes in ELGs of SD+SiNPs treatment.	26458	'Slc27a2'	Shared rhythmic genes in ELGs among NC, SiNPs, SD+SiNPs treatments
22174	'Tyro3'	Unique rhythmic genes in ELGs of NC treatment.	22763	Zfr	Unique rhythmic genes in ELGs of SiNPs treatment.	18632	Pex11b	Unique rhythmic genes in ELGs of SD+SiNPs treatment.	26557	'Homer2'	Shared rhythmic genes in ELGs among NC, SiNPs, SD+SiNPs treatments
22209	'Ube2a'	Unique rhythmic genes in ELGs of NC treatment.	23821	Bace1	Unique rhythmic genes in ELGs of SiNPs treatment.	18634	Pex7	Unique rhythmic genes in ELGs of SD+SiNPs treatment.	26562	'Ncdn'	Shared rhythmic genes in ELGs among NC, SiNPs, SD+SiNPs treatments
22228	'Ucp2'	Unique rhythmic genes in ELGs of NC treatment.	23853	Def6	Unique rhythmic genes in ELGs of SiNPs treatment.	18636	Cfp	Unique rhythmic genes in ELGs of SD+SiNPs treatment.	26570	'Slc7a11'	Shared rhythmic genes in ELGs among NC, SiNPs, SD+SiNPs treatments
22234	'Ugcg'	Unique rhythmic genes in ELGs of NC treatment.	23886	Gdf15	Unique rhythmic genes in ELGs of SiNPs treatment.	18641	Pfkl	Unique rhythmic genes in ELGs of SD+SiNPs treatment.	26931	'Ppp2r5c'	Shared rhythmic genes in ELGs among NC, SiNPs, SD+SiNPs treatments
22323	'Vasp'	Unique rhythmic genes in ELGs of NC treatment.	23917	Impdh1	Unique rhythmic genes in ELGs of SiNPs treatment.	18645	Pfn2	Unique rhythmic genes in ELGs of SD+SiNPs treatment.	26942	'Spag1'	Shared rhythmic genes in ELGs among NC, SiNPs, SD+SiNPs treatments
22354	'Vipr1'	Unique rhythmic genes in ELGs of NC treatment.	23954	Nek3	Unique rhythmic genes in ELGs of SiNPs treatment.	18685	Phtf1	Unique rhythmic genes in ELGs of SD+SiNPs treatment.	27053	'Asns'	Shared rhythmic genes in ELGs among NC, SiNPs, SD+SiNPs treatments
22378	'Wbp2'	Unique rhythmic genes in ELGs of NC treatment.	23960	Oas1g	Unique rhythmic genes in ELGs of SiNPs treatment.	18710	Pik3r3	Unique rhythmic genes in ELGs of SD+SiNPs treatment.	27267	'Cars'	Shared rhythmic genes in ELGs among NC, SiNPs, SD+SiNPs treatments
22404	'Wiz'	Unique rhythmic genes in ELGs of NC treatment.	23962	Oasl2	Unique rhythmic genes in ELGs of SiNPs treatment.	18716	Pip	Unique rhythmic genes in ELGs of SD+SiNPs treatment.	27356	'Insl6'	Shared rhythmic genes in ELGs among NC, SiNPs, SD+SiNPs treatments
22441	'Xlr'	Unique rhythmic genes in ELGs of NC treatment.	23967	Osr1	Unique rhythmic genes in ELGs of SiNPs treatment.	18749	Prkacb	Unique rhythmic genes in ELGs of SD+SiNPs treatment.	27375	'Tjp3'	Shared rhythmic genes in ELGs among NC, SiNPs, SD+SiNPs treatments
22619	'Siae'	Unique rhythmic genes in ELGs of NC treatment.	23999	Twf2	Unique rhythmic genes in ELGs of SiNPs treatment.	18759	Prkci	Unique rhythmic genes in ELGs of SD+SiNPs treatment.	27406	'Abcf3'	Shared rhythmic genes in ELGs among NC, SiNPs, SD+SiNPs treatments
22634	'Plagl1'	Unique rhythmic genes in ELGs of NC treatment.	24004	Rai2	Unique rhythmic genes in ELGs of SiNPs treatment.	18767	Pkia	Unique rhythmic genes in ELGs of SD+SiNPs treatment.	27414	'Sergef'	Shared rhythmic genes in ELGs among NC, SiNPs, SD+SiNPs treatments
22648	'Zfp11'	Unique rhythmic genes in ELGs of NC treatment.	24010	Ik	Unique rhythmic genes in ELGs of SiNPs treatment.	18783	Pla2g4a	Unique rhythmic genes in ELGs of SD+SiNPs treatment.	27965	'Spg21'	Shared rhythmic genes in ELGs among NC, SiNPs, SD+SiNPs treatments
22654	'Zfp13'	Unique rhythmic genes in ELGs of NC treatment.	24018	Rngtt	Unique rhythmic genes in ELGs of SiNPs treatment.	18795	Plcb1	Unique rhythmic genes in ELGs of SD+SiNPs treatment.	28200	'Dhrs4'	Shared rhythmic genes in ELGs among NC, SiNPs, SD+SiNPs treatments
22666	'Zbtb14'	Unique rhythmic genes in ELGs of NC treatment.	24045	Scamp3	Unique rhythmic genes in ELGs of SiNPs treatment.	18798	Plcb4	Unique rhythmic genes in ELGs of SD+SiNPs treatment.	29810	'Bag3'	Shared rhythmic genes in ELGs among NC, SiNPs, SD+SiNPs treatments
22690	'Zfp28'	Unique rhythmic genes in ELGs of NC treatment.	24056	Sh3bp5	Unique rhythmic genes in ELGs of SiNPs treatment.	18805	Pld1	Unique rhythmic genes in ELGs of SD+SiNPs treatment.	51789	'Tnk2'	Shared rhythmic genes in ELGs among NC, SiNPs, SD+SiNPs treatments
22781	'Ikzf4'	Unique rhythmic genes in ELGs of NC treatment.	24058	Sigirr	Unique rhythmic genes in ELGs of SiNPs treatment.	18938	Ppp1r14b	Unique rhythmic genes in ELGs of SD+SiNPs treatment.	52174	'Tmem222'	Shared rhythmic genes in ELGs among NC, SiNPs, SD+SiNPs treatments
23790	'Coro1c'	Unique rhythmic genes in ELGs of NC treatment.	24063	Spry1	Unique rhythmic genes in ELGs of SiNPs treatment.	18950	Pnp	Unique rhythmic genes in ELGs of SD+SiNPs treatment.	52468	'Ctdsp2'	Shared rhythmic genes in ELGs among NC, SiNPs, SD+SiNPs treatments
23912	'Rhof'	Unique rhythmic genes in ELGs of NC treatment.	26379	Esrra	Unique rhythmic genes in ELGs of SiNPs treatment.	18968	Pola1	Unique rhythmic genes in ELGs of SD+SiNPs treatment.	52538	'Acaa2'	Shared rhythmic genes in ELGs among NC, SiNPs, SD+SiNPs treatments
23922	'Jtb'	Unique rhythmic genes in ELGs of NC treatment.	26386	Hsf4	Unique rhythmic genes in ELGs of SiNPs treatment.	18973	Pole	Unique rhythmic genes in ELGs of SD+SiNPs treatment.	53318	'Pdlim3'	Shared rhythmic genes in ELGs among NC, SiNPs, SD+SiNPs treatments
23942	'Mta2'	Unique rhythmic genes in ELGs of NC treatment.	26446	Psmb3	Unique rhythmic genes in ELGs of SiNPs treatment.	18975	Polg	Unique rhythmic genes in ELGs of SD+SiNPs treatment.	53375	'Mtx2'	Shared rhythmic genes in ELGs among NC, SiNPs, SD+SiNPs treatments
23980	'Pebp1'	Unique rhythmic genes in ELGs of NC treatment.	26447	Poli	Unique rhythmic genes in ELGs of SiNPs treatment.	18985	Pou2af1	Unique rhythmic genes in ELGs of SD+SiNPs treatment.	53376	'Usp2'	Shared rhythmic genes in ELGs among NC, SiNPs, SD+SiNPs treatments
24064	'Spry2'	Unique rhythmic genes in ELGs of NC treatment.	27054	Sec23b	Unique rhythmic genes in ELGs of SiNPs treatment.	19013	Ppara	Unique rhythmic genes in ELGs of SD+SiNPs treatment.	53867	'Col5a3'	Shared rhythmic genes in ELGs among NC, SiNPs, SD+SiNPs treatments
24086	'Tlk2'	Unique rhythmic genes in ELGs of NC treatment.	27057	Ncoa4	Unique rhythmic genes in ELGs of SiNPs treatment.	19027	Sypl	Unique rhythmic genes in ELGs of SD+SiNPs treatment.	54006	'Deaf1'	Shared rhythmic genes in ELGs among NC, SiNPs, SD+SiNPs treatments
26384	'Gnpda1'	Unique rhythmic genes in ELGs of NC treatment.	27078	B9d1	Unique rhythmic genes in ELGs of SiNPs treatment.	19035	Ppib	Unique rhythmic genes in ELGs of SD+SiNPs treatment.	54352	'Irx5'	Shared rhythmic genes in ELGs among NC, SiNPs, SD+SiNPs treatments
26390	'Mapkbp1'	Unique rhythmic genes in ELGs of NC treatment.	27103	Eif2ak4	Unique rhythmic genes in ELGs of SiNPs treatment.	19042	Ppm1a	Unique rhythmic genes in ELGs of SD+SiNPs treatment.	54357	'Epb41l4b'	Shared rhythmic genes in ELGs among NC, SiNPs, SD+SiNPs treatments
26413	'Mapk1'	Unique rhythmic genes in ELGs of NC treatment.	27176	Rpl7a	Unique rhythmic genes in ELGs of SiNPs treatment.	19045	Ppp1ca	Unique rhythmic genes in ELGs of SD+SiNPs treatment.	54450	'Il1f5'	Shared rhythmic genes in ELGs among NC, SiNPs, SD+SiNPs treatments
26420	'Mapk9'	Unique rhythmic genes in ELGs of NC treatment.	27205	Podxl	Unique rhythmic genes in ELGs of SiNPs treatment.	19046	Ppp1cb	Unique rhythmic genes in ELGs of SD+SiNPs treatment.	54636	'Wdr45'	Shared rhythmic genes in ELGs among NC, SiNPs, SD+SiNPs treatments
26437	'Psg17'	Unique rhythmic genes in ELGs of NC treatment.	27225	Ddx24	Unique rhythmic genes in ELGs of SiNPs treatment.	19056	Ppp3cb	Unique rhythmic genes in ELGs of SD+SiNPs treatment.	55947	'Dclre1a'	Shared rhythmic genes in ELGs among NC, SiNPs, SD+SiNPs treatments
26897	'Acot1'	Unique rhythmic genes in ELGs of NC treatment.	27261	Dok3	Unique rhythmic genes in ELGs of SiNPs treatment.	19058	Ppp3r1	Unique rhythmic genes in ELGs of SD+SiNPs treatment.	55950	'Bri3'	Shared rhythmic genes in ELGs among NC, SiNPs, SD+SiNPs treatments
26904	'Sh2d1b1'	Unique rhythmic genes in ELGs of NC treatment.	27275	Nufip1	Unique rhythmic genes in ELGs of SiNPs treatment.	19069	Nup88	Unique rhythmic genes in ELGs of SD+SiNPs treatment.	55963	'Slc1a4'	Shared rhythmic genes in ELGs among NC, SiNPs, SD+SiNPs treatments
26914	'Macroh2a1'	Unique rhythmic genes in ELGs of NC treatment.	27397	Mrpl17	Unique rhythmic genes in ELGs of SiNPs treatment.	19070	Mob4	Unique rhythmic genes in ELGs of SD+SiNPs treatment.	56017	'Slc2a8'	Shared rhythmic genes in ELGs among NC, SiNPs, SD+SiNPs treatments
26919	'Zfp346'	Unique rhythmic genes in ELGs of NC treatment.	27398	Mrpl2	Unique rhythmic genes in ELGs of SiNPs treatment.	19075	Prim1	Unique rhythmic genes in ELGs of SD+SiNPs treatment.	56050	'Cyp39a1'	Shared rhythmic genes in ELGs among NC, SiNPs, SD+SiNPs treatments
26920	'Cntrl'	Unique rhythmic genes in ELGs of NC treatment.	27632	Nelfe	Unique rhythmic genes in ELGs of SiNPs treatment.	19082	Prkag1	Unique rhythmic genes in ELGs of SD+SiNPs treatment.	56176	'Pigp'	Shared rhythmic genes in ELGs among NC, SiNPs, SD+SiNPs treatments
27028	'Ermap'	Unique rhythmic genes in ELGs of NC treatment.	27756	Lsm2	Unique rhythmic genes in ELGs of SiNPs treatment.	19087	Prkar2a	Unique rhythmic genes in ELGs of SD+SiNPs treatment.	56210	'Rev1'	Shared rhythmic genes in ELGs among NC, SiNPs, SD+SiNPs treatments
27215	'Azi2'	Unique rhythmic genes in ELGs of NC treatment.	28028	Mrpl50	Unique rhythmic genes in ELGs of SiNPs treatment.	19108	Prkx	Unique rhythmic genes in ELGs of SD+SiNPs treatment.	56220	'Zfp386'	Shared rhythmic genes in ELGs among NC, SiNPs, SD+SiNPs treatments
27355	'Pald1'	Unique rhythmic genes in ELGs of NC treatment.	28077	Med10	Unique rhythmic genes in ELGs of SiNPs treatment.	19139	Prps1	Unique rhythmic genes in ELGs of SD+SiNPs treatment.	56222	'Cited4'	Shared rhythmic genes in ELGs among NC, SiNPs, SD+SiNPs treatments
27371	'Sh2d2a'	Unique rhythmic genes in ELGs of NC treatment.	28105	Trim36	Unique rhythmic genes in ELGs of SiNPs treatment.	19156	Psap	Unique rhythmic genes in ELGs of SD+SiNPs treatment.	56275	'Rbm14'	Shared rhythmic genes in ELGs among NC, SiNPs, SD+SiNPs treatments
27387	'Sh2d3c'	Unique rhythmic genes in ELGs of NC treatment.	28135	Cep63	Unique rhythmic genes in ELGs of SiNPs treatment.	19229	Ptk2b	Unique rhythmic genes in ELGs of SD+SiNPs treatment.	56278	'Gkap1'	Shared rhythmic genes in ELGs among NC, SiNPs, SD+SiNPs treatments
27419	'Naglu'	Unique rhythmic genes in ELGs of NC treatment.	28250	Slco1a4	Unique rhythmic genes in ELGs of SiNPs treatment.	19247	Ptpn11	Unique rhythmic genes in ELGs of SD+SiNPs treatment.	56289	'Rassf1'	Shared rhythmic genes in ELGs among NC, SiNPs, SD+SiNPs treatments
27643	'Ubl4a'	Unique rhythmic genes in ELGs of NC treatment.	29857	Mapk12	Unique rhythmic genes in ELGs of SiNPs treatment.	19248	Ptpn12	Unique rhythmic genes in ELGs of SD+SiNPs treatment.	56317	'Anapc7'	Shared rhythmic genes in ELGs among NC, SiNPs, SD+SiNPs treatments
28006	'Washc2'	Unique rhythmic genes in ELGs of NC treatment.	29861	Dpf1	Unique rhythmic genes in ELGs of SiNPs treatment.	19255	Ptpn2	Unique rhythmic genes in ELGs of SD+SiNPs treatment.	56351	'Ptges3'	Shared rhythmic genes in ELGs among NC, SiNPs, SD+SiNPs treatments
28169	'Agpat3'	Unique rhythmic genes in ELGs of NC treatment.	29862	Ninj2	Unique rhythmic genes in ELGs of SiNPs treatment.	19262	Ptpra	Unique rhythmic genes in ELGs of SD+SiNPs treatment.	56369	'Apip'	Shared rhythmic genes in ELGs among NC, SiNPs, SD+SiNPs treatments
29809	'Rabgap1l'	Unique rhythmic genes in ELGs of NC treatment.	29870	Gtse1	Unique rhythmic genes in ELGs of SiNPs treatment.	19270	Ptprg	Unique rhythmic genes in ELGs of SD+SiNPs treatment.	56417	'Adar'	Shared rhythmic genes in ELGs among NC, SiNPs, SD+SiNPs treatments
29871	'Scmh1'	Unique rhythmic genes in ELGs of NC treatment.	29873	Cspg5	Unique rhythmic genes in ELGs of SiNPs treatment.	19271	Ptprj	Unique rhythmic genes in ELGs of SD+SiNPs treatment.	56427	'Tubd1'	Shared rhythmic genes in ELGs among NC, SiNPs, SD+SiNPs treatments
30928	'Zbtb18'	Unique rhythmic genes in ELGs of NC treatment.	30057	Timm8b	Unique rhythmic genes in ELGs of SiNPs treatment.	19272	Ptprk	Unique rhythmic genes in ELGs of SD+SiNPs treatment.	56445	'Dnaja2'	Shared rhythmic genes in ELGs among NC, SiNPs, SD+SiNPs treatments
30930	'Vps26a'	Unique rhythmic genes in ELGs of NC treatment.	30840	Fbxl6	Unique rhythmic genes in ELGs of SiNPs treatment.	19325	Rab10	Unique rhythmic genes in ELGs of SD+SiNPs treatment.	56449	'Ybx3'	Shared rhythmic genes in ELGs among NC, SiNPs, SD+SiNPs treatments
30934	'Tor1b'	Unique rhythmic genes in ELGs of NC treatment.	30877	Gnl3	Unique rhythmic genes in ELGs of SiNPs treatment.	19334	Rab22a	Unique rhythmic genes in ELGs of SD+SiNPs treatment.	56461	'Kcnip3'	Shared rhythmic genes in ELGs among NC, SiNPs, SD+SiNPs treatments
30949	'Lcmt1'	Unique rhythmic genes in ELGs of NC treatment.	30931	Tor1a	Unique rhythmic genes in ELGs of SiNPs treatment.	19339	Rab3a	Unique rhythmic genes in ELGs of SD+SiNPs treatment.	56485	'Slc2a5'	Shared rhythmic genes in ELGs among NC, SiNPs, SD+SiNPs treatments
30951	'Cbx8'	Unique rhythmic genes in ELGs of NC treatment.	30935	Tor3a	Unique rhythmic genes in ELGs of SiNPs treatment.	19340	Rab3d	Unique rhythmic genes in ELGs of SD+SiNPs treatment.	56520	'Nme4'	Shared rhythmic genes in ELGs among NC, SiNPs, SD+SiNPs treatments
50723	'Icosl'	Unique rhythmic genes in ELGs of NC treatment.	30956	Aass	Unique rhythmic genes in ELGs of SiNPs treatment.	19344	Rab5b	Unique rhythmic genes in ELGs of SD+SiNPs treatment.	56530	'Cnpy2'	Shared rhythmic genes in ELGs among NC, SiNPs, SD+SiNPs treatments
50724	'Sap30l'	Unique rhythmic genes in ELGs of NC treatment.	50709	H1f4	Unique rhythmic genes in ELGs of SiNPs treatment.	19357	Rad21	Unique rhythmic genes in ELGs of SD+SiNPs treatment.	56550	'Ube2d2a'	Shared rhythmic genes in ELGs among NC, SiNPs, SD+SiNPs treatments
50771	'Atp9b'	Unique rhythmic genes in ELGs of NC treatment.	50762	Fbxo6	Unique rhythmic genes in ELGs of SiNPs treatment.	19358	Rad23a	Unique rhythmic genes in ELGs of SD+SiNPs treatment.	56807	'Scamp5'	Shared rhythmic genes in ELGs among NC, SiNPs, SD+SiNPs treatments
50772	'Mapk6'	Unique rhythmic genes in ELGs of NC treatment.	50782	Rgs11	Unique rhythmic genes in ELGs of SiNPs treatment.	19361	Rad51	Unique rhythmic genes in ELGs of SD+SiNPs treatment.	56812	'Dnajb2'	Shared rhythmic genes in ELGs among NC, SiNPs, SD+SiNPs treatments
50880	'Scly'	Unique rhythmic genes in ELGs of NC treatment.	50905	Il17rb	Unique rhythmic genes in ELGs of SiNPs treatment.	19378	Aldh1a2	Unique rhythmic genes in ELGs of SD+SiNPs treatment.	57441	'Gmnn'	Shared rhythmic genes in ELGs among NC, SiNPs, SD+SiNPs treatments
51798	'Ech1'	Unique rhythmic genes in ELGs of NC treatment.	50915	Grb14	Unique rhythmic genes in ELGs of SiNPs treatment.	19383	Raly	Unique rhythmic genes in ELGs of SD+SiNPs treatment.	57890	'Il17re'	Shared rhythmic genes in ELGs among NC, SiNPs, SD+SiNPs treatments
51960	'Kctd18'	Unique rhythmic genes in ELGs of NC treatment.	50926	Hnrnpdl	Unique rhythmic genes in ELGs of SiNPs treatment.	19646	Rbbp4	Unique rhythmic genes in ELGs of SD+SiNPs treatment.	58242	'Nudt11'	Shared rhythmic genes in ELGs among NC, SiNPs, SD+SiNPs treatments
52055	'Rab11fip5'	Unique rhythmic genes in ELGs of NC treatment.	51791	Rgs14	Unique rhythmic genes in ELGs of SiNPs treatment.	19654	Rbm6	Unique rhythmic genes in ELGs of SD+SiNPs treatment.	58810	'Akr1a1'	Shared rhythmic genes in ELGs among NC, SiNPs, SD+SiNPs treatments
52076	'Tmem38b'	Unique rhythmic genes in ELGs of NC treatment.	51799	Rundc3a	Unique rhythmic genes in ELGs of SiNPs treatment.	19672	Rcn1	Unique rhythmic genes in ELGs of SD+SiNPs treatment.	59005	'Trappc2l'	Shared rhythmic genes in ELGs among NC, SiNPs, SD+SiNPs treatments
52231	'Ankzf1'	Unique rhythmic genes in ELGs of NC treatment.	52009	Jpt2	Unique rhythmic genes in ELGs of SiNPs treatment.	19731	Rgl1	Unique rhythmic genes in ELGs of SD+SiNPs treatment.	59021	'Rab2a'	Shared rhythmic genes in ELGs among NC, SiNPs, SD+SiNPs treatments
52397	'Zfp644'	Unique rhythmic genes in ELGs of NC treatment.	52123	Agpat5	Unique rhythmic genes in ELGs of SiNPs treatment.	19752	Rnase1	Unique rhythmic genes in ELGs of SD+SiNPs treatment.	59027	'Nampt'	Shared rhythmic genes in ELGs among NC, SiNPs, SD+SiNPs treatments
52428	'Rhpn2'	Unique rhythmic genes in ELGs of NC treatment.	52430	Echdc2	Unique rhythmic genes in ELGs of SiNPs treatment.	20128	Trim30a	Unique rhythmic genes in ELGs of SD+SiNPs treatment.	59052	'Mettl9'	Shared rhythmic genes in ELGs among NC, SiNPs, SD+SiNPs treatments
52822	'Rufy3'	Unique rhythmic genes in ELGs of NC treatment.	52513	Ddx56	Unique rhythmic genes in ELGs of SiNPs treatment.	20133	Rrm1	Unique rhythmic genes in ELGs of SD+SiNPs treatment.	59092	'Pcbp4'	Shared rhythmic genes in ELGs among NC, SiNPs, SD+SiNPs treatments
52846	'Cnot11'	Unique rhythmic genes in ELGs of NC treatment.	52668	Ifi27	Unique rhythmic genes in ELGs of SiNPs treatment.	20187	Ryk	Unique rhythmic genes in ELGs of SD+SiNPs treatment.	60441	'Mrpl38'	Shared rhythmic genes in ELGs among NC, SiNPs, SD+SiNPs treatments
53310	'Dlg3'	Unique rhythmic genes in ELGs of NC treatment.	52713	Ccdc59	Unique rhythmic genes in ELGs of SiNPs treatment.	20191	Ryr2	Unique rhythmic genes in ELGs of SD+SiNPs treatment.	60455	'Tmem8'	Shared rhythmic genes in ELGs among NC, SiNPs, SD+SiNPs treatments
53332	'Mtmr1'	Unique rhythmic genes in ELGs of NC treatment.	52808	Tspyl2	Unique rhythmic genes in ELGs of SiNPs treatment.	20193	S100a1	Unique rhythmic genes in ELGs of SD+SiNPs treatment.	60599	'Trp53inp1'	Shared rhythmic genes in ELGs among NC, SiNPs, SD+SiNPs treatments
53356	'Eif3g'	Unique rhythmic genes in ELGs of NC treatment.	53320	Folh1	Unique rhythmic genes in ELGs of SiNPs treatment.	20220	Sap18	Unique rhythmic genes in ELGs of SD+SiNPs treatment.	64050	'Yeats4'	Shared rhythmic genes in ELGs among NC, SiNPs, SD+SiNPs treatments
53357	'Pla2g6'	Unique rhythmic genes in ELGs of NC treatment.	53379	Hnrnpa2b1	Unique rhythmic genes in ELGs of SiNPs treatment.	20229	Sat1	Unique rhythmic genes in ELGs of SD+SiNPs treatment.	64209	'Herpud1'	Shared rhythmic genes in ELGs among NC, SiNPs, SD+SiNPs treatments
53608	'Map3k6'	Unique rhythmic genes in ELGs of NC treatment.	53598	Dctn3	Unique rhythmic genes in ELGs of SiNPs treatment.	20276	Scnn1a	Unique rhythmic genes in ELGs of SD+SiNPs treatment.	64294	'Itm2c'	Shared rhythmic genes in ELGs among NC, SiNPs, SD+SiNPs treatments
53614	'Reck'	Unique rhythmic genes in ELGs of NC treatment.	53607	Snrpa	Unique rhythmic genes in ELGs of SiNPs treatment.	20280	Scp2	Unique rhythmic genes in ELGs of SD+SiNPs treatment.	64297	'Gprc5b'	Shared rhythmic genes in ELGs among NC, SiNPs, SD+SiNPs treatments
53857	'Tuba8'	Unique rhythmic genes in ELGs of NC treatment.	53609	Clasrp	Unique rhythmic genes in ELGs of SiNPs treatment.	20299	Ccl22	Unique rhythmic genes in ELGs of SD+SiNPs treatment.	64435	'Fcamr'	Shared rhythmic genes in ELGs among NC, SiNPs, SD+SiNPs treatments
53868	'Rab25'	Unique rhythmic genes in ELGs of NC treatment.	53869	Rab11a	Unique rhythmic genes in ELGs of SiNPs treatment.	20302	Ccl3	Unique rhythmic genes in ELGs of SD+SiNPs treatment.	64540	'Tspan4'	Shared rhythmic genes in ELGs among NC, SiNPs, SD+SiNPs treatments
53886	'Cdkl2'	Unique rhythmic genes in ELGs of NC treatment.	53871	Pkd2l2	Unique rhythmic genes in ELGs of SiNPs treatment.	20304	Ccl5	Unique rhythmic genes in ELGs of SD+SiNPs treatment.	65113	'Ndfip1'	Shared rhythmic genes in ELGs among NC, SiNPs, SD+SiNPs treatments
53902	'Rcan3'	Unique rhythmic genes in ELGs of NC treatment.	53893	Nudt5	Unique rhythmic genes in ELGs of SiNPs treatment.	20340	Glg1	Unique rhythmic genes in ELGs of SD+SiNPs treatment.	65256	'Asb2'	Shared rhythmic genes in ELGs among NC, SiNPs, SD+SiNPs treatments
54128	'Pmm2'	Unique rhythmic genes in ELGs of NC treatment.	54141	Spag5	Unique rhythmic genes in ELGs of SiNPs treatment.	20342	Selenbp2	Unique rhythmic genes in ELGs of SD+SiNPs treatment.	65962	'Slc9a3r2'	Shared rhythmic genes in ELGs among NC, SiNPs, SD+SiNPs treatments
54199	'Ccrl2'	Unique rhythmic genes in ELGs of NC treatment.	54196	Pabpn1	Unique rhythmic genes in ELGs of SiNPs treatment.	20356	Sema5a	Unique rhythmic genes in ELGs of SD+SiNPs treatment.	65972	'Ifi30'	Shared rhythmic genes in ELGs among NC, SiNPs, SD+SiNPs treatments
54215	'Cd160'	Unique rhythmic genes in ELGs of NC treatment.	54399	Bet1l	Unique rhythmic genes in ELGs of SiNPs treatment.	20365	Serf1	Unique rhythmic genes in ELGs of SD+SiNPs treatment.	66146	'Maco1'	Shared rhythmic genes in ELGs among NC, SiNPs, SD+SiNPs treatments
54338	'Slc23a2'	Unique rhythmic genes in ELGs of NC treatment.	54446	Nfat5	Unique rhythmic genes in ELGs of SiNPs treatment.	20377	Sfrp1	Unique rhythmic genes in ELGs of SD+SiNPs treatment.	66147	'Necap2'	Shared rhythmic genes in ELGs among NC, SiNPs, SD+SiNPs treatments
54354	'Rassf5'	Unique rhythmic genes in ELGs of NC treatment.	54561	Nap1l3	Unique rhythmic genes in ELGs of SiNPs treatment.	20411	Sorbs1	Unique rhythmic genes in ELGs of SD+SiNPs treatment.	66155	'Ufc1'	Shared rhythmic genes in ELGs among NC, SiNPs, SD+SiNPs treatments
54486	'Hpgds'	Unique rhythmic genes in ELGs of NC treatment.	54609	Ubqln2	Unique rhythmic genes in ELGs of SiNPs treatment.	20463	Cox7a2l	Unique rhythmic genes in ELGs of SD+SiNPs treatment.	66193	'Pithd1'	Shared rhythmic genes in ELGs among NC, SiNPs, SD+SiNPs treatments
54630	'Prickle3'	Unique rhythmic genes in ELGs of NC treatment.	54624	Paf1	Unique rhythmic genes in ELGs of SiNPs treatment.	20479	Vps4b	Unique rhythmic genes in ELGs of SD+SiNPs treatment.	66255	'Hsbp1l1'	Shared rhythmic genes in ELGs among NC, SiNPs, SD+SiNPs treatments
54673	'Sh3glb1'	Unique rhythmic genes in ELGs of NC treatment.	54710	Hs3st3b1	Unique rhythmic genes in ELGs of SiNPs treatment.	20492	Slbp	Unique rhythmic genes in ELGs of SD+SiNPs treatment.	66278	'Smim20'	Shared rhythmic genes in ELGs among NC, SiNPs, SD+SiNPs treatments
55935	'Fnbp4'	Unique rhythmic genes in ELGs of NC treatment.	55927	Hes6	Unique rhythmic genes in ELGs of SiNPs treatment.	20496	Slc12a2	Unique rhythmic genes in ELGs of SD+SiNPs treatment.	66350	'Pla2g12a'	Shared rhythmic genes in ELGs among NC, SiNPs, SD+SiNPs treatments
55936	'Ctps2'	Unique rhythmic genes in ELGs of NC treatment.	55932	Gbp3	Unique rhythmic genes in ELGs of SiNPs treatment.	20514	Slc1a5	Unique rhythmic genes in ELGs of SD+SiNPs treatment.	66361	'Zfand1'	Shared rhythmic genes in ELGs among NC, SiNPs, SD+SiNPs treatments
55943	'Stx8'	Unique rhythmic genes in ELGs of NC treatment.	55934	Rp9	Unique rhythmic genes in ELGs of SiNPs treatment.	20537	Slc5a1	Unique rhythmic genes in ELGs of SD+SiNPs treatment.	66375	'Dhrs7'	Shared rhythmic genes in ELGs among NC, SiNPs, SD+SiNPs treatments
55944	'Eif3d'	Unique rhythmic genes in ELGs of NC treatment.	55979	Agpat1	Unique rhythmic genes in ELGs of SiNPs treatment.	20539	Slc7a5	Unique rhythmic genes in ELGs of SD+SiNPs treatment.	66403	'Asf1a'	Shared rhythmic genes in ELGs among NC, SiNPs, SD+SiNPs treatments
55960	'Ebag9'	Unique rhythmic genes in ELGs of NC treatment.	55990	Fmo2	Unique rhythmic genes in ELGs of SiNPs treatment.	20555	Slfn1	Unique rhythmic genes in ELGs of SD+SiNPs treatment.	66404	'Rtf2'	Shared rhythmic genes in ELGs among NC, SiNPs, SD+SiNPs treatments
55982	'Paxip1'	Unique rhythmic genes in ELGs of NC treatment.	56013	Srcin1	Unique rhythmic genes in ELGs of SiNPs treatment.	20558	Slfn4	Unique rhythmic genes in ELGs of SD+SiNPs treatment.	66431	'Oxld1'	Shared rhythmic genes in ELGs among NC, SiNPs, SD+SiNPs treatments
55987	'Cpxm2'	Unique rhythmic genes in ELGs of NC treatment.	56095	Ftsj3	Unique rhythmic genes in ELGs of SiNPs treatment.	20585	Hltf	Unique rhythmic genes in ELGs of SD+SiNPs treatment.	66446	'Exosc7'	Shared rhythmic genes in ELGs among NC, SiNPs, SD+SiNPs treatments
56068	'Ammecr1'	Unique rhythmic genes in ELGs of NC treatment.	56187	Rabggta	Unique rhythmic genes in ELGs of SiNPs treatment.	20603	Sms	Unique rhythmic genes in ELGs of SD+SiNPs treatment.	66451	'2610528J11Rik'	Shared rhythmic genes in ELGs among NC, SiNPs, SD+SiNPs treatments
56069	'Il17b'	Unique rhythmic genes in ELGs of NC treatment.	56219	Extl1	Unique rhythmic genes in ELGs of SiNPs treatment.	20610	Sumo3	Unique rhythmic genes in ELGs of SD+SiNPs treatment.	66469	'Prxl2b'	Shared rhythmic genes in ELGs among NC, SiNPs, SD+SiNPs treatments
56077	'Dgke'	Unique rhythmic genes in ELGs of NC treatment.	56221	Ccl24	Unique rhythmic genes in ELGs of SiNPs treatment.	20612	Siglec1	Unique rhythmic genes in ELGs of SD+SiNPs treatment.	66508	'Lamtor1'	Shared rhythmic genes in ELGs among NC, SiNPs, SD+SiNPs treatments
56195	'Ptbp2'	Unique rhythmic genes in ELGs of NC treatment.	56258	Hnrnph2	Unique rhythmic genes in ELGs of SiNPs treatment.	20613	Snai1	Unique rhythmic genes in ELGs of SD+SiNPs treatment.	66510	'Rnf181'	Shared rhythmic genes in ELGs among NC, SiNPs, SD+SiNPs treatments
56249	'Actr8'	Unique rhythmic genes in ELGs of NC treatment.	56354	Dnajc7	Unique rhythmic genes in ELGs of SiNPs treatment.	20623	Snrk	Unique rhythmic genes in ELGs of SD+SiNPs treatment.	66522	'Pgpep1'	Shared rhythmic genes in ELGs among NC, SiNPs, SD+SiNPs treatments
56314	'Zfp113'	Unique rhythmic genes in ELGs of NC treatment.	56386	B4galt6	Unique rhythmic genes in ELGs of SiNPs treatment.	20637	Snrnp70	Unique rhythmic genes in ELGs of SD+SiNPs treatment.	66528	'Smim5'	Shared rhythmic genes in ELGs among NC, SiNPs, SD+SiNPs treatments
56332	'Amotl2'	Unique rhythmic genes in ELGs of NC treatment.	56389	Stx5a	Unique rhythmic genes in ELGs of SiNPs treatment.	20639	Snrpb2	Unique rhythmic genes in ELGs of SD+SiNPs treatment.	66530	'Ubxn6'	Shared rhythmic genes in ELGs among NC, SiNPs, SD+SiNPs treatments
56356	'Gltp'	Unique rhythmic genes in ELGs of NC treatment.	56390	Znrd2	Unique rhythmic genes in ELGs of SiNPs treatment.	20649	Sntb1	Unique rhythmic genes in ELGs of SD+SiNPs treatment.	66566	'Ntpcr'	Shared rhythmic genes in ELGs among NC, SiNPs, SD+SiNPs treatments
56372	'1110004F10Rik'	Unique rhythmic genes in ELGs of NC treatment.	56405	Dusp14	Unique rhythmic genes in ELGs of SiNPs treatment.	20656	Sod2	Unique rhythmic genes in ELGs of SD+SiNPs treatment.	66614	'Gpatch4'	Shared rhythmic genes in ELGs among NC, SiNPs, SD+SiNPs treatments
56404	'Trip4'	Unique rhythmic genes in ELGs of NC treatment.	56419	Diaph3	Unique rhythmic genes in ELGs of SiNPs treatment.	20698	Sphk1	Unique rhythmic genes in ELGs of SD+SiNPs treatment.	66705	'Dnase1l2'	Shared rhythmic genes in ELGs among NC, SiNPs, SD+SiNPs treatments
56422	'Hbs1l'	Unique rhythmic genes in ELGs of NC treatment.	56424	Stub1	Unique rhythmic genes in ELGs of SiNPs treatment.	20701	Serpina1b	Unique rhythmic genes in ELGs of SD+SiNPs treatment.	66711	'Sbds'	Shared rhythmic genes in ELGs among NC, SiNPs, SD+SiNPs treatments
56444	'Actr10'	Unique rhythmic genes in ELGs of NC treatment.	56436	Adrm1	Unique rhythmic genes in ELGs of SiNPs treatment.	20714	Serpina3k	Unique rhythmic genes in ELGs of SD+SiNPs treatment.	66753	'Erlec1'	Shared rhythmic genes in ELGs among NC, SiNPs, SD+SiNPs treatments
56515	'Rnf138'	Unique rhythmic genes in ELGs of NC treatment.	56468	Socs5	Unique rhythmic genes in ELGs of SiNPs treatment.	20723	Serpinb9	Unique rhythmic genes in ELGs of SD+SiNPs treatment.	66795	'Atg10'	Shared rhythmic genes in ELGs among NC, SiNPs, SD+SiNPs treatments
56541	'Habp4'	Unique rhythmic genes in ELGs of NC treatment.	56505	Ruvbl1	Unique rhythmic genes in ELGs of SiNPs treatment.	20744	Strbp	Unique rhythmic genes in ELGs of SD+SiNPs treatment.	66813	'Bcl2l14'	Shared rhythmic genes in ELGs among NC, SiNPs, SD+SiNPs treatments
56542	'Ick'	Unique rhythmic genes in ELGs of NC treatment.	56703	Pigo	Unique rhythmic genes in ELGs of SiNPs treatment.	20771	Mucl1	Unique rhythmic genes in ELGs of SD+SiNPs treatment.	66824	'Pycard'	Shared rhythmic genes in ELGs among NC, SiNPs, SD+SiNPs treatments
56626	'Poll'	Unique rhythmic genes in ELGs of NC treatment.	56742	Psrc1	Unique rhythmic genes in ELGs of SiNPs treatment.	20779	Src	Unique rhythmic genes in ELGs of SD+SiNPs treatment.	66889	'Rnf128'	Shared rhythmic genes in ELGs among NC, SiNPs, SD+SiNPs treatments
56644	'Clec7a'	Unique rhythmic genes in ELGs of NC treatment.	57320	Park7	Unique rhythmic genes in ELGs of SiNPs treatment.	20787	Srebf1	Unique rhythmic genes in ELGs of SD+SiNPs treatment.	66905	'Plin3'	Shared rhythmic genes in ELGs among NC, SiNPs, SD+SiNPs treatments
56692	'Lamtor3'	Unique rhythmic genes in ELGs of NC treatment.	57442	Kcne3	Unique rhythmic genes in ELGs of SiNPs treatment.	20821	Trim21	Unique rhythmic genes in ELGs of SD+SiNPs treatment.	66917	'Chordc1'	Shared rhythmic genes in ELGs among NC, SiNPs, SD+SiNPs treatments
56705	'Ranbp9'	Unique rhythmic genes in ELGs of NC treatment.	57750	Wdr12	Unique rhythmic genes in ELGs of SiNPs treatment.	20844	Stam	Unique rhythmic genes in ELGs of SD+SiNPs treatment.	66948	'Acad8'	Shared rhythmic genes in ELGs among NC, SiNPs, SD+SiNPs treatments
56722	'Litaf'	Unique rhythmic genes in ELGs of NC treatment.	57784	Bin3	Unique rhythmic genes in ELGs of SiNPs treatment.	20845	Star	Unique rhythmic genes in ELGs of SD+SiNPs treatment.	67031	'Upf3a'	Shared rhythmic genes in ELGs among NC, SiNPs, SD+SiNPs treatments
56738	'Mocs1'	Unique rhythmic genes in ELGs of NC treatment.	58246	Slc35b4	Unique rhythmic genes in ELGs of SiNPs treatment.	20851	Stat5b	Unique rhythmic genes in ELGs of SD+SiNPs treatment.	67035	'Dnajb4'	Shared rhythmic genes in ELGs among NC, SiNPs, SD+SiNPs treatments
56743	'Lat2'	Unique rhythmic genes in ELGs of NC treatment.	58804	Cdc42ep5	Unique rhythmic genes in ELGs of SiNPs treatment.	20916	Sucla2	Unique rhythmic genes in ELGs of SD+SiNPs treatment.	67071	'Rps6ka6'	Shared rhythmic genes in ELGs among NC, SiNPs, SD+SiNPs treatments
56774	'Slc6a14'	Unique rhythmic genes in ELGs of NC treatment.	59029	Psmd14	Unique rhythmic genes in ELGs of SiNPs treatment.	20924	Supt5	Unique rhythmic genes in ELGs of SD+SiNPs treatment.	67087	'Ctnnbip1'	Shared rhythmic genes in ELGs among NC, SiNPs, SD+SiNPs treatments
56784	'Ralgapa1'	Unique rhythmic genes in ELGs of NC treatment.	59030	Mkks	Unique rhythmic genes in ELGs of SiNPs treatment.	20930	Surf1	Unique rhythmic genes in ELGs of SD+SiNPs treatment.	67088	'Cand2'	Shared rhythmic genes in ELGs among NC, SiNPs, SD+SiNPs treatments
57259	'Tob2'	Unique rhythmic genes in ELGs of NC treatment.	59057	Zfp24	Unique rhythmic genes in ELGs of SiNPs treatment.	20947	Swap70	Unique rhythmic genes in ELGs of SD+SiNPs treatment.	67118	'Bfar'	Shared rhythmic genes in ELGs among NC, SiNPs, SD+SiNPs treatments
57426	'Scgb1b2'	Unique rhythmic genes in ELGs of NC treatment.	59308	Emcn	Unique rhythmic genes in ELGs of SiNPs treatment.	21346	Tagln2	Unique rhythmic genes in ELGs of SD+SiNPs treatment.	67128	'Ube2g1'	Shared rhythmic genes in ELGs among NC, SiNPs, SD+SiNPs treatments
57436	'Gabarapl1'	Unique rhythmic genes in ELGs of NC treatment.	60534	Fancg	Unique rhythmic genes in ELGs of SiNPs treatment.	21399	Tcea1	Unique rhythmic genes in ELGs of SD+SiNPs treatment.	67145	'Tomm34'	Shared rhythmic genes in ELGs among NC, SiNPs, SD+SiNPs treatments
57815	'Spata5'	Unique rhythmic genes in ELGs of NC treatment.	63872	Zfp296	Unique rhythmic genes in ELGs of SiNPs treatment.	21406	Tcf12	Unique rhythmic genes in ELGs of SD+SiNPs treatment.	67204	'Eif2s2'	Shared rhythmic genes in ELGs among NC, SiNPs, SD+SiNPs treatments
57913	'Pidd1'	Unique rhythmic genes in ELGs of NC treatment.	63954	Rbp7	Unique rhythmic genes in ELGs of SiNPs treatment.	21419	Tfap2b	Unique rhythmic genes in ELGs of SD+SiNPs treatment.	67246	'Resf1'	Shared rhythmic genes in ELGs among NC, SiNPs, SD+SiNPs treatments
58175	'Rgs20'	Unique rhythmic genes in ELGs of NC treatment.	63959	Slc29a1	Unique rhythmic genes in ELGs of SiNPs treatment.	21766	Tex261	Unique rhythmic genes in ELGs of SD+SiNPs treatment.	67247	'Marc2'	Shared rhythmic genes in ELGs among NC, SiNPs, SD+SiNPs treatments
58207	'Slc43a3'	Unique rhythmic genes in ELGs of NC treatment.	64144	Mllt1	Unique rhythmic genes in ELGs of SiNPs treatment.	21770	Ppp2r5d	Unique rhythmic genes in ELGs of SD+SiNPs treatment.	67252	'Cap2'	Shared rhythmic genes in ELGs among NC, SiNPs, SD+SiNPs treatments
58234	'Shank3'	Unique rhythmic genes in ELGs of NC treatment.	64213	St7	Unique rhythmic genes in ELGs of SiNPs treatment.	21814	Tgfbr3	Unique rhythmic genes in ELGs of SD+SiNPs treatment.	67282	'Washc3'	Shared rhythmic genes in ELGs among NC, SiNPs, SD+SiNPs treatments
58240	'Hs1bp3'	Unique rhythmic genes in ELGs of NC treatment.	64296	Abhd8	Unique rhythmic genes in ELGs of SiNPs treatment.	21843	Tial1	Unique rhythmic genes in ELGs of SD+SiNPs treatment.	67333	'Stk35'	Shared rhythmic genes in ELGs among NC, SiNPs, SD+SiNPs treatments
58249	'Fibp'	Unique rhythmic genes in ELGs of NC treatment.	64436	Inpp5e	Unique rhythmic genes in ELGs of SiNPs treatment.	21849	Trim28	Unique rhythmic genes in ELGs of SD+SiNPs treatment.	67389	'C1qtnf12'	Shared rhythmic genes in ELGs among NC, SiNPs, SD+SiNPs treatments
58805	'Mlxipl'	Unique rhythmic genes in ELGs of NC treatment.	64657	Mrps10	Unique rhythmic genes in ELGs of SiNPs treatment.	21854	Timm17a	Unique rhythmic genes in ELGs of SD+SiNPs treatment.	67426	'Coq8a'	Shared rhythmic genes in ELGs among NC, SiNPs, SD+SiNPs treatments
58887	'Repin1'	Unique rhythmic genes in ELGs of NC treatment.	64660	Mrps24	Unique rhythmic genes in ELGs of SiNPs treatment.	21938	Tnfrsf1b	Unique rhythmic genes in ELGs of SD+SiNPs treatment.	67432	'Hoga1'	Shared rhythmic genes in ELGs among NC, SiNPs, SD+SiNPs treatments
59009	'Sh3rf1'	Unique rhythmic genes in ELGs of NC treatment.	65019	Rpl23	Unique rhythmic genes in ELGs of SiNPs treatment.	22026	Nr2c2	Unique rhythmic genes in ELGs of SD+SiNPs treatment.	67443	'Map1lc3b'	Shared rhythmic genes in ELGs among NC, SiNPs, SD+SiNPs treatments
59022	'Edf1'	Unique rhythmic genes in ELGs of NC treatment.	65961	Utp3	Unique rhythmic genes in ELGs of SiNPs treatment.	22032	Traf4	Unique rhythmic genes in ELGs of SD+SiNPs treatment.	67460	'Decr1'	Shared rhythmic genes in ELGs among NC, SiNPs, SD+SiNPs treatments
59038	'Pxmp4'	Unique rhythmic genes in ELGs of NC treatment.	66047	Mrpl54	Unique rhythmic genes in ELGs of SiNPs treatment.	22129	Ttc3	Unique rhythmic genes in ELGs of SD+SiNPs treatment.	67604	'Get4'	Shared rhythmic genes in ELGs among NC, SiNPs, SD+SiNPs treatments
59058	'Bhlhe22'	Unique rhythmic genes in ELGs of NC treatment.	66056	Zfp524	Unique rhythmic genes in ELGs of SiNPs treatment.	22169	Cmpk2	Unique rhythmic genes in ELGs of SD+SiNPs treatment.	67655	'Ctdp1'	Shared rhythmic genes in ELGs among NC, SiNPs, SD+SiNPs treatments
64082	'Popdc2'	Unique rhythmic genes in ELGs of NC treatment.	66059	Krtcap2	Unique rhythmic genes in ELGs of SiNPs treatment.	22196	Ube2i	Unique rhythmic genes in ELGs of SD+SiNPs treatment.	67702	'Rnf149'	Shared rhythmic genes in ELGs among NC, SiNPs, SD+SiNPs treatments
64099	'Parvg'	Unique rhythmic genes in ELGs of NC treatment.	66061	Tctex1d2	Unique rhythmic genes in ELGs of SiNPs treatment.	22217	Usp12	Unique rhythmic genes in ELGs of SD+SiNPs treatment.	67727	'Stx17'	Shared rhythmic genes in ELGs among NC, SiNPs, SD+SiNPs treatments
64451	'Dip2a'	Unique rhythmic genes in ELGs of NC treatment.	66070	Cwc15	Unique rhythmic genes in ELGs of SiNPs treatment.	22247	Umps	Unique rhythmic genes in ELGs of SD+SiNPs treatment.	67729	'Mansc1'	Shared rhythmic genes in ELGs among NC, SiNPs, SD+SiNPs treatments
66044	'Dtd1'	Unique rhythmic genes in ELGs of NC treatment.	66090	Ypel3	Unique rhythmic genes in ELGs of SiNPs treatment.	22258	Usp4	Unique rhythmic genes in ELGs of SD+SiNPs treatment.	67801	'Pllp'	Shared rhythmic genes in ELGs among NC, SiNPs, SD+SiNPs treatments
66050	'0610009B22Rik'	Unique rhythmic genes in ELGs of NC treatment.	66094	Lsm7	Unique rhythmic genes in ELGs of SiNPs treatment.	22273	Uqcrc1	Unique rhythmic genes in ELGs of SD+SiNPs treatment.	67803	'Limd2'	Shared rhythmic genes in ELGs among NC, SiNPs, SD+SiNPs treatments
66052	'Sdhc'	Unique rhythmic genes in ELGs of NC treatment.	66111	Tmed3	Unique rhythmic genes in ELGs of SiNPs treatment.	22288	Utrn	Unique rhythmic genes in ELGs of SD+SiNPs treatment.	67812	'Ubxn4'	Shared rhythmic genes in ELGs among NC, SiNPs, SD+SiNPs treatments
66067	'Gtpbp8'	Unique rhythmic genes in ELGs of NC treatment.	66164	Nip7	Unique rhythmic genes in ELGs of SiNPs treatment.	22318	Vamp2	Unique rhythmic genes in ELGs of SD+SiNPs treatment.	67856	'Echdc3'	Shared rhythmic genes in ELGs among NC, SiNPs, SD+SiNPs treatments
66114	'Dnajc30'	Unique rhythmic genes in ELGs of NC treatment.	66168	Grina	Unique rhythmic genes in ELGs of SiNPs treatment.	22319	Vamp3	Unique rhythmic genes in ELGs of SD+SiNPs treatment.	67863	'Slc25a11'	Shared rhythmic genes in ELGs among NC, SiNPs, SD+SiNPs treatments
66116	'Nat8f1'	Unique rhythmic genes in ELGs of NC treatment.	66197	Cks2	Unique rhythmic genes in ELGs of SiNPs treatment.	22324	Vav1	Unique rhythmic genes in ELGs of SD+SiNPs treatment.	67867	'Lrrc28'	Shared rhythmic genes in ELGs among NC, SiNPs, SD+SiNPs treatments
66235	'Eif1ax'	Unique rhythmic genes in ELGs of NC treatment.	66229	Rpl7l1	Unique rhythmic genes in ELGs of SiNPs treatment.	22329	Vcam1	Unique rhythmic genes in ELGs of SD+SiNPs treatment.	67876	'Coq10b'	Shared rhythmic genes in ELGs among NC, SiNPs, SD+SiNPs treatments
66259	'Camk2n1'	Unique rhythmic genes in ELGs of NC treatment.	66230	Mrps28	Unique rhythmic genes in ELGs of SiNPs treatment.	22350	Ezr	Unique rhythmic genes in ELGs of SD+SiNPs treatment.	67878	'Tmem33'	Shared rhythmic genes in ELGs among NC, SiNPs, SD+SiNPs treatments
66296	'Haus2'	Unique rhythmic genes in ELGs of NC treatment.	66237	Atp6v1g2	Unique rhythmic genes in ELGs of SiNPs treatment.	22352	Vim	Unique rhythmic genes in ELGs of SD+SiNPs treatment.	67880	'Dcxr'	Shared rhythmic genes in ELGs among NC, SiNPs, SD+SiNPs treatments
66368	'Rtca'	Unique rhythmic genes in ELGs of NC treatment.	66242	Mrps16	Unique rhythmic genes in ELGs of SiNPs treatment.	22380	Wbp4	Unique rhythmic genes in ELGs of SD+SiNPs treatment.	67946	'Spata6'	Shared rhythmic genes in ELGs among NC, SiNPs, SD+SiNPs treatments
66405	'Mcts2'	Unique rhythmic genes in ELGs of NC treatment.	66249	Pno1	Unique rhythmic genes in ELGs of SiNPs treatment.	22384	Eif4h	Unique rhythmic genes in ELGs of SD+SiNPs treatment.	67952	'Tomm20'	Shared rhythmic genes in ELGs among NC, SiNPs, SD+SiNPs treatments
66408	'Aptx'	Unique rhythmic genes in ELGs of NC treatment.	66260	Tmem54	Unique rhythmic genes in ELGs of SiNPs treatment.	22390	Wee1	Unique rhythmic genes in ELGs of SD+SiNPs treatment.	67976	'Trabd'	Shared rhythmic genes in ELGs among NC, SiNPs, SD+SiNPs treatments
66435	'Uggt2'	Unique rhythmic genes in ELGs of NC treatment.	66268	Pigyl	Unique rhythmic genes in ELGs of SiNPs treatment.	22419	Wnt5b	Unique rhythmic genes in ELGs of SD+SiNPs treatment.	67980	'Gnpda2'	Shared rhythmic genes in ELGs among NC, SiNPs, SD+SiNPs treatments
66459	'Pyurf'	Unique rhythmic genes in ELGs of NC treatment.	66308	Mplkip	Unique rhythmic genes in ELGs of SiNPs treatment.	22427	Wrn	Unique rhythmic genes in ELGs of SD+SiNPs treatment.	68020	'Apopt1'	Shared rhythmic genes in ELGs among NC, SiNPs, SD+SiNPs treatments
66461	'Ptpmt1'	Unique rhythmic genes in ELGs of NC treatment.	66352	Blzf1	Unique rhythmic genes in ELGs of SiNPs treatment.	22632	Yy1	Unique rhythmic genes in ELGs of SD+SiNPs treatment.	68023	'Pdf'	Shared rhythmic genes in ELGs among NC, SiNPs, SD+SiNPs treatments
66497	'Cmss1'	Unique rhythmic genes in ELGs of NC treatment.	66374	2310011J03Rik	Unique rhythmic genes in ELGs of SiNPs treatment.	22687	Zpr1	Unique rhythmic genes in ELGs of SD+SiNPs treatment.	68024	'H2bc4'	Shared rhythmic genes in ELGs among NC, SiNPs, SD+SiNPs treatments
66498	'Dda1'	Unique rhythmic genes in ELGs of NC treatment.	66387	Nudt8	Unique rhythmic genes in ELGs of SiNPs treatment.	22710	Zfp52	Unique rhythmic genes in ELGs of SD+SiNPs treatment.	68077	'Nop53'	Shared rhythmic genes in ELGs among NC, SiNPs, SD+SiNPs treatments
66514	'Asrgl1'	Unique rhythmic genes in ELGs of NC treatment.	66396	Ccdc82	Unique rhythmic genes in ELGs of SiNPs treatment.	22755	Zfp93	Unique rhythmic genes in ELGs of SD+SiNPs treatment.	68087	'Dcakd'	Shared rhythmic genes in ELGs among NC, SiNPs, SD+SiNPs treatments
66515	'Cul7'	Unique rhythmic genes in ELGs of NC treatment.	66399	Tsfm	Unique rhythmic genes in ELGs of SiNPs treatment.	22764	Zfx	Unique rhythmic genes in ELGs of SD+SiNPs treatment.	68098	'Rchy1'	Shared rhythmic genes in ELGs among NC, SiNPs, SD+SiNPs treatments
66526	'Tceanc2'	Unique rhythmic genes in ELGs of NC treatment.	66400	Alkbh7	Unique rhythmic genes in ELGs of SiNPs treatment.	22770	Zhx1	Unique rhythmic genes in ELGs of SD+SiNPs treatment.	68137	'Kdelr1'	Shared rhythmic genes in ELGs among NC, SiNPs, SD+SiNPs treatments
66549	'Aggf1'	Unique rhythmic genes in ELGs of NC treatment.	66407	Mrps15	Unique rhythmic genes in ELGs of SiNPs treatment.	22782	Slc30a1	Unique rhythmic genes in ELGs of SD+SiNPs treatment.	68177	'Ebpl'	Shared rhythmic genes in ELGs among NC, SiNPs, SD+SiNPs treatments
66569	'Gdpd1'	Unique rhythmic genes in ELGs of NC treatment.	66422	Dctpp1	Unique rhythmic genes in ELGs of SiNPs treatment.	22793	Zyx	Unique rhythmic genes in ELGs of SD+SiNPs treatment.	68184	'Denr'	Shared rhythmic genes in ELGs among NC, SiNPs, SD+SiNPs treatments
66588	'Cmpk1'	Unique rhythmic genes in ELGs of NC treatment.	66437	Fis1	Unique rhythmic genes in ELGs of SiNPs treatment.	23802	Amfr	Unique rhythmic genes in ELGs of SD+SiNPs treatment.	68263	'Pdhb'	Shared rhythmic genes in ELGs among NC, SiNPs, SD+SiNPs treatments
66590	'Farsa'	Unique rhythmic genes in ELGs of NC treatment.	66496	Ppdpf	Unique rhythmic genes in ELGs of SiNPs treatment.	23807	Arih2	Unique rhythmic genes in ELGs of SD+SiNPs treatment.	68267	'Slc25a22'	Shared rhythmic genes in ELGs among NC, SiNPs, SD+SiNPs treatments
66610	'Abi3'	Unique rhythmic genes in ELGs of NC treatment.	66500	Slc30a7	Unique rhythmic genes in ELGs of SiNPs treatment.	23834	Cdc6	Unique rhythmic genes in ELGs of SD+SiNPs treatment.	68298	'Ncapd2'	Shared rhythmic genes in ELGs among NC, SiNPs, SD+SiNPs treatments
66611	'Ribc1'	Unique rhythmic genes in ELGs of NC treatment.	66506	Psmg3	Unique rhythmic genes in ELGs of SiNPs treatment.	23877	Fiz1	Unique rhythmic genes in ELGs of SD+SiNPs treatment.	68337	'Crip2'	Shared rhythmic genes in ELGs among NC, SiNPs, SD+SiNPs treatments
66624	'Spcs2'	Unique rhythmic genes in ELGs of NC treatment.	66513	Tab1	Unique rhythmic genes in ELGs of SiNPs treatment.	23924	Katna1	Unique rhythmic genes in ELGs of SD+SiNPs treatment.	68501	'Nsmce2'	Shared rhythmic genes in ELGs among NC, SiNPs, SD+SiNPs treatments
66682	'Trappc5'	Unique rhythmic genes in ELGs of NC treatment.	66523	2810004N23Rik	Unique rhythmic genes in ELGs of SiNPs treatment.	23938	Map2k5	Unique rhythmic genes in ELGs of SD+SiNPs treatment.	68512	'Tomm5'	Shared rhythmic genes in ELGs among NC, SiNPs, SD+SiNPs treatments
66734	'Map1lc3a'	Unique rhythmic genes in ELGs of NC treatment.	66525	Timm50	Unique rhythmic genes in ELGs of SiNPs treatment.	23971	Papss1	Unique rhythmic genes in ELGs of SD+SiNPs treatment.	68519	'Eml1'	Shared rhythmic genes in ELGs among NC, SiNPs, SD+SiNPs treatments
66736	'Emc2'	Unique rhythmic genes in ELGs of NC treatment.	66556	Drap1	Unique rhythmic genes in ELGs of SiNPs treatment.	23989	Med24	Unique rhythmic genes in ELGs of SD+SiNPs treatment.	68520	'Zfyve21'	Shared rhythmic genes in ELGs among NC, SiNPs, SD+SiNPs treatments
66810	'Rbm22'	Unique rhythmic genes in ELGs of NC treatment.	66568	Rwdd3	Unique rhythmic genes in ELGs of SiNPs treatment.	24017	Rnf13	Unique rhythmic genes in ELGs of SD+SiNPs treatment.	68554	'Cebpzos'	Shared rhythmic genes in ELGs among NC, SiNPs, SD+SiNPs treatments
66928	'Dmac1'	Unique rhythmic genes in ELGs of NC treatment.	66585	Snrnp40	Unique rhythmic genes in ELGs of SiNPs treatment.	24083	Natd1	Unique rhythmic genes in ELGs of SD+SiNPs treatment.	68558	'Ankra2'	Shared rhythmic genes in ELGs among NC, SiNPs, SD+SiNPs treatments
66952	'2310030G06Rik'	Unique rhythmic genes in ELGs of NC treatment.	66642	Ctnnbl1	Unique rhythmic genes in ELGs of SiNPs treatment.	24128	Xrn2	Unique rhythmic genes in ELGs of SD+SiNPs treatment.	68603	'Pmvk'	Shared rhythmic genes in ELGs among NC, SiNPs, SD+SiNPs treatments
66993	'Smarcd3'	Unique rhythmic genes in ELGs of NC treatment.	66648	Tpgs2	Unique rhythmic genes in ELGs of SiNPs treatment.	24135	Zfp68	Unique rhythmic genes in ELGs of SD+SiNPs treatment.	68607	'Serhl'	Shared rhythmic genes in ELGs among NC, SiNPs, SD+SiNPs treatments
67019	'Actr6'	Unique rhythmic genes in ELGs of NC treatment.	66656	Eef1d	Unique rhythmic genes in ELGs of SiNPs treatment.	26364	Adgre5	Unique rhythmic genes in ELGs of SD+SiNPs treatment.	68631	'Cryl1'	Shared rhythmic genes in ELGs among NC, SiNPs, SD+SiNPs treatments
67023	'Use1'	Unique rhythmic genes in ELGs of NC treatment.	66765	4933411K16Rik	Unique rhythmic genes in ELGs of SiNPs treatment.	26385	Grk6	Unique rhythmic genes in ELGs of SD+SiNPs treatment.	68682	'Slc44a2'	Shared rhythmic genes in ELGs among NC, SiNPs, SD+SiNPs treatments
67059	'Ola1'	Unique rhythmic genes in ELGs of NC treatment.	66816	Thap2	Unique rhythmic genes in ELGs of SiNPs treatment.	26396	Map2k2	Unique rhythmic genes in ELGs of SD+SiNPs treatment.	68721	'1110032A03Rik'	Shared rhythmic genes in ELGs among NC, SiNPs, SD+SiNPs treatments
67064	'Chmp1b'	Unique rhythmic genes in ELGs of NC treatment.	66817	Tmem170	Unique rhythmic genes in ELGs of SiNPs treatment.	26397	Map2k3	Unique rhythmic genes in ELGs of SD+SiNPs treatment.	68729	'Trim37'	Shared rhythmic genes in ELGs among NC, SiNPs, SD+SiNPs treatments
67072	'Cdc37l1'	Unique rhythmic genes in ELGs of NC treatment.	66845	Mrpl33	Unique rhythmic genes in ELGs of SiNPs treatment.	26399	Map2k6	Unique rhythmic genes in ELGs of SD+SiNPs treatment.	68738	'Acss1'	Shared rhythmic genes in ELGs among NC, SiNPs, SD+SiNPs treatments
67095	'Trak1'	Unique rhythmic genes in ELGs of NC treatment.	66864	Clec14a	Unique rhythmic genes in ELGs of SiNPs treatment.	26406	Map3k3	Unique rhythmic genes in ELGs of SD+SiNPs treatment.	68810	'Nexn'	Shared rhythmic genes in ELGs among NC, SiNPs, SD+SiNPs treatments
67119	'Ccdc159'	Unique rhythmic genes in ELGs of NC treatment.	66869	Zfp869	Unique rhythmic genes in ELGs of SiNPs treatment.	26409	Map3k7	Unique rhythmic genes in ELGs of SD+SiNPs treatment.	68875	'Tmcc2'	Shared rhythmic genes in ELGs among NC, SiNPs, SD+SiNPs treatments
67150	'Rnf141'	Unique rhythmic genes in ELGs of NC treatment.	66875	Swt1	Unique rhythmic genes in ELGs of SiNPs treatment.	26412	Map4k2	Unique rhythmic genes in ELGs of SD+SiNPs treatment.	68877	'Maf1'	Shared rhythmic genes in ELGs among NC, SiNPs, SD+SiNPs treatments
67155	'Smarca2'	Unique rhythmic genes in ELGs of NC treatment.	66934	Dsn1	Unique rhythmic genes in ELGs of SiNPs treatment.	26426	Nubp2	Unique rhythmic genes in ELGs of SD+SiNPs treatment.	68929	'Mospd3'	Shared rhythmic genes in ELGs among NC, SiNPs, SD+SiNPs treatments
67171	'Dram2'	Unique rhythmic genes in ELGs of NC treatment.	66940	Shisa5	Unique rhythmic genes in ELGs of SiNPs treatment.	26428	Orc4	Unique rhythmic genes in ELGs of SD+SiNPs treatment.	69090	'Ascc1'	Shared rhythmic genes in ELGs among NC, SiNPs, SD+SiNPs treatments
67178	'Zmat5'	Unique rhythmic genes in ELGs of NC treatment.	66949	Trim59	Unique rhythmic genes in ELGs of SiNPs treatment.	26441	Psma4	Unique rhythmic genes in ELGs of SD+SiNPs treatment.	69104	'March5'	Shared rhythmic genes in ELGs among NC, SiNPs, SD+SiNPs treatments
67200	'Ccdc77'	Unique rhythmic genes in ELGs of NC treatment.	66978	Luc7l	Unique rhythmic genes in ELGs of SiNPs treatment.	26442	Psma5	Unique rhythmic genes in ELGs of SD+SiNPs treatment.	69137	'Vstm5'	Shared rhythmic genes in ELGs among NC, SiNPs, SD+SiNPs treatments
67217	'L3hypdh'	Unique rhythmic genes in ELGs of NC treatment.	66983	Zfp830	Unique rhythmic genes in ELGs of SiNPs treatment.	26445	Psmb2	Unique rhythmic genes in ELGs of SD+SiNPs treatment.	69171	'Cnppd1'	Shared rhythmic genes in ELGs among NC, SiNPs, SD+SiNPs treatments
67260	'Cers4'	Unique rhythmic genes in ELGs of NC treatment.	66991	Khdc3	Unique rhythmic genes in ELGs of SiNPs treatment.	26554	Cul3	Unique rhythmic genes in ELGs of SD+SiNPs treatment.	69634	'Clybl'	Shared rhythmic genes in ELGs among NC, SiNPs, SD+SiNPs treatments
67307	'Pbld2'	Unique rhythmic genes in ELGs of NC treatment.	66997	Psmd12	Unique rhythmic genes in ELGs of SiNPs treatment.	26572	Cops3	Unique rhythmic genes in ELGs of SD+SiNPs treatment.	69654	'Dctn2'	Shared rhythmic genes in ELGs among NC, SiNPs, SD+SiNPs treatments
67425	'Eps8l1'	Unique rhythmic genes in ELGs of NC treatment.	67011	Mettl6	Unique rhythmic genes in ELGs of SiNPs treatment.	26886	Cenph	Unique rhythmic genes in ELGs of SD+SiNPs treatment.	69674	'Mif4gd'	Shared rhythmic genes in ELGs among NC, SiNPs, SD+SiNPs treatments
67440	'Mtpap'	Unique rhythmic genes in ELGs of NC treatment.	67063	Tmem246	Unique rhythmic genes in ELGs of SiNPs treatment.	26893	Cops6	Unique rhythmic genes in ELGs of SD+SiNPs treatment.	69692	'Hddc2'	Shared rhythmic genes in ELGs among NC, SiNPs, SD+SiNPs treatments
67444	'Ilkap'	Unique rhythmic genes in ELGs of NC treatment.	67068	Dynlrb1	Unique rhythmic genes in ELGs of SiNPs treatment.	26912	Gcat	Unique rhythmic genes in ELGs of SD+SiNPs treatment.	69773	'Timm29'	Shared rhythmic genes in ELGs among NC, SiNPs, SD+SiNPs treatments
67490	'Ufl1'	Unique rhythmic genes in ELGs of NC treatment.	67073	Pi4k2b	Unique rhythmic genes in ELGs of SiNPs treatment.	26943	Serinc3	Unique rhythmic genes in ELGs of SD+SiNPs treatment.	69790	'Med30'	Shared rhythmic genes in ELGs among NC, SiNPs, SD+SiNPs treatments
67501	'Ccdc50'	Unique rhythmic genes in ELGs of NC treatment.	67096	Mmachc	Unique rhythmic genes in ELGs of SiNPs treatment.	26992	Brd7	Unique rhythmic genes in ELGs of SD+SiNPs treatment.	70152	'Mettl7a1'	Shared rhythmic genes in ELGs among NC, SiNPs, SD+SiNPs treatments
67509	'Saysd1'	Unique rhythmic genes in ELGs of NC treatment.	67101	2310039H08Rik	Unique rhythmic genes in ELGs of SiNPs treatment.	27007	Klrk1	Unique rhythmic genes in ELGs of SD+SiNPs treatment.	70155	'Ogfrl1'	Shared rhythmic genes in ELGs among NC, SiNPs, SD+SiNPs treatments
67554	'Slc25a30'	Unique rhythmic genes in ELGs of NC treatment.	67121	Mastl	Unique rhythmic genes in ELGs of SiNPs treatment.	27055	Fkbp9	Unique rhythmic genes in ELGs of SD+SiNPs treatment.	70178	'Abhd17c'	Shared rhythmic genes in ELGs among NC, SiNPs, SD+SiNPs treatments
67581	'Tbc1d23'	Unique rhythmic genes in ELGs of NC treatment.	67122	Nrarp	Unique rhythmic genes in ELGs of SiNPs treatment.	27221	Chaf1a	Unique rhythmic genes in ELGs of SD+SiNPs treatment.	70223	'Nars'	Shared rhythmic genes in ELGs among NC, SiNPs, SD+SiNPs treatments
67582	'Slc25a26'	Unique rhythmic genes in ELGs of NC treatment.	67141	Fbxo5	Unique rhythmic genes in ELGs of SiNPs treatment.	27359	Sytl4	Unique rhythmic genes in ELGs of SD+SiNPs treatment.	70274	'Ly6g6e'	Shared rhythmic genes in ELGs among NC, SiNPs, SD+SiNPs treatments
67623	'Tm7sf3'	Unique rhythmic genes in ELGs of NC treatment.	67196	Ube2t	Unique rhythmic genes in ELGs of SiNPs treatment.	27360	Add3	Unique rhythmic genes in ELGs of SD+SiNPs treatment.	70315	'Hdac8'	Shared rhythmic genes in ELGs among NC, SiNPs, SD+SiNPs treatments
67652	'Spaca1'	Unique rhythmic genes in ELGs of NC treatment.	67248	Rpl39	Unique rhythmic genes in ELGs of SiNPs treatment.	27388	Ptdss2	Unique rhythmic genes in ELGs of SD+SiNPs treatment.	70356	'St13'	Shared rhythmic genes in ELGs among NC, SiNPs, SD+SiNPs treatments
67664	'Rnf125'	Unique rhythmic genes in ELGs of NC treatment.	67292	Pigc	Unique rhythmic genes in ELGs of SiNPs treatment.	27402	Pdhx	Unique rhythmic genes in ELGs of SD+SiNPs treatment.	70396	'Asnsd1'	Shared rhythmic genes in ELGs among NC, SiNPs, SD+SiNPs treatments
67724	'Pop1'	Unique rhythmic genes in ELGs of NC treatment.	67374	Jam2	Unique rhythmic genes in ELGs of SiNPs treatment.	27410	Abca3	Unique rhythmic genes in ELGs of SD+SiNPs treatment.	70423	'Tspan15'	Shared rhythmic genes in ELGs among NC, SiNPs, SD+SiNPs treatments
67755	'Ddx47'	Unique rhythmic genes in ELGs of NC treatment.	67397	Erp29	Unique rhythmic genes in ELGs of SiNPs treatment.	27681	Snf8	Unique rhythmic genes in ELGs of SD+SiNPs treatment.	70466	'Ckap2l'	Shared rhythmic genes in ELGs among NC, SiNPs, SD+SiNPs treatments
67770	'Caap1'	Unique rhythmic genes in ELGs of NC treatment.	67422	Dhdds	Unique rhythmic genes in ELGs of SiNPs treatment.	27784	Commd8	Unique rhythmic genes in ELGs of SD+SiNPs treatment.	70484	'Slc35d2'	Shared rhythmic genes in ELGs among NC, SiNPs, SD+SiNPs treatments
67788	'Sfr1'	Unique rhythmic genes in ELGs of NC treatment.	67455	Klhl13	Unique rhythmic genes in ELGs of SiNPs treatment.	27966	Rrp9	Unique rhythmic genes in ELGs of SD+SiNPs treatment.	70533	'Btf3l4'	Shared rhythmic genes in ELGs among NC, SiNPs, SD+SiNPs treatments
67808	'Tprgl'	Unique rhythmic genes in ELGs of NC treatment.	67493	Mettl16	Unique rhythmic genes in ELGs of SiNPs treatment.	28109	D10Wsu102e	Unique rhythmic genes in ELGs of SD+SiNPs treatment.	70546	'Zdhhc2'	Shared rhythmic genes in ELGs among NC, SiNPs, SD+SiNPs treatments
67844	'Rab32'	Unique rhythmic genes in ELGs of NC treatment.	67544	Fam120b	Unique rhythmic genes in ELGs of SiNPs treatment.	28126	Nop16	Unique rhythmic genes in ELGs of SD+SiNPs treatment.	70617	'Fam241a'	Shared rhythmic genes in ELGs among NC, SiNPs, SD+SiNPs treatments
67893	'Tmem86a'	Unique rhythmic genes in ELGs of NC treatment.	67553	Gstcd	Unique rhythmic genes in ELGs of SiNPs treatment.	28185	Tomm70a	Unique rhythmic genes in ELGs of SD+SiNPs treatment.	70859	'Lrrc63'	Shared rhythmic genes in ELGs among NC, SiNPs, SD+SiNPs treatments
67894	'Fam45a'	Unique rhythmic genes in ELGs of NC treatment.	67556	Pigm	Unique rhythmic genes in ELGs of SiNPs treatment.	28295	Gatd3a	Unique rhythmic genes in ELGs of SD+SiNPs treatment.	71263	'Mro'	Shared rhythmic genes in ELGs among NC, SiNPs, SD+SiNPs treatments
67897	'Rnmt'	Unique rhythmic genes in ELGs of NC treatment.	67610	Rspry1	Unique rhythmic genes in ELGs of SiNPs treatment.	29807	Tpk1	Unique rhythmic genes in ELGs of SD+SiNPs treatment.	71275	'Noxred1'	Shared rhythmic genes in ELGs among NC, SiNPs, SD+SiNPs treatments
67914	'Coq9'	Unique rhythmic genes in ELGs of NC treatment.	67618	Aasdhppt	Unique rhythmic genes in ELGs of SiNPs treatment.	29811	Ndrg2	Unique rhythmic genes in ELGs of SD+SiNPs treatment.	71336	'Rbks'	Shared rhythmic genes in ELGs among NC, SiNPs, SD+SiNPs treatments
67938	'Myl12b'	Unique rhythmic genes in ELGs of NC treatment.	67693	Hypk	Unique rhythmic genes in ELGs of SiNPs treatment.	29819	Stau2	Unique rhythmic genes in ELGs of SD+SiNPs treatment.	71481	'Alpk1'	Shared rhythmic genes in ELGs among NC, SiNPs, SD+SiNPs treatments
67996	'Srsf6'	Unique rhythmic genes in ELGs of NC treatment.	67701	Wfdc2	Unique rhythmic genes in ELGs of SiNPs treatment.	29864	Rnf11	Unique rhythmic genes in ELGs of SD+SiNPs treatment.	71514	'Sfpq'	Shared rhythmic genes in ELGs among NC, SiNPs, SD+SiNPs treatments
68107	'Cntd1'	Unique rhythmic genes in ELGs of NC treatment.	67703	Kirrel3	Unique rhythmic genes in ELGs of SiNPs treatment.	29869	Ulk2	Unique rhythmic genes in ELGs of SD+SiNPs treatment.	71529	'Kazn'	Shared rhythmic genes in ELGs among NC, SiNPs, SD+SiNPs treatments
68115	'Maip1'	Unique rhythmic genes in ELGs of NC treatment.	67710	Polr2g	Unique rhythmic genes in ELGs of SiNPs treatment.	29875	Iqgap1	Unique rhythmic genes in ELGs of SD+SiNPs treatment.	71706	'Slc46a3'	Shared rhythmic genes in ELGs among NC, SiNPs, SD+SiNPs treatments
68134	'Upf3b'	Unique rhythmic genes in ELGs of NC treatment.	67719	2310057J18Rik	Unique rhythmic genes in ELGs of SiNPs treatment.	30795	Fkbp3	Unique rhythmic genes in ELGs of SD+SiNPs treatment.	71787	'Trnau1ap'	Shared rhythmic genes in ELGs among NC, SiNPs, SD+SiNPs treatments
68176	'Inka1'	Unique rhythmic genes in ELGs of NC treatment.	67728	Dph2	Unique rhythmic genes in ELGs of SiNPs treatment.	30838	Fbxw4	Unique rhythmic genes in ELGs of SD+SiNPs treatment.	71817	'Tmem50a'	Shared rhythmic genes in ELGs among NC, SiNPs, SD+SiNPs treatments
68196	'Hsbp1'	Unique rhythmic genes in ELGs of NC treatment.	67767	Jagn1	Unique rhythmic genes in ELGs of SiNPs treatment.	30925	Slamf6	Unique rhythmic genes in ELGs of SD+SiNPs treatment.	71998	'Slc25a35'	Shared rhythmic genes in ELGs among NC, SiNPs, SD+SiNPs treatments
68219	'Nudt21'	Unique rhythmic genes in ELGs of NC treatment.	67774	Borcs5	Unique rhythmic genes in ELGs of SiNPs treatment.	30926	Glrx3	Unique rhythmic genes in ELGs of SD+SiNPs treatment.	72057	'Phf10'	Shared rhythmic genes in ELGs among NC, SiNPs, SD+SiNPs treatments
68259	'Ift80'	Unique rhythmic genes in ELGs of NC treatment.	67790	Rab39b	Unique rhythmic genes in ELGs of SiNPs treatment.	30940	Usp25	Unique rhythmic genes in ELGs of SD+SiNPs treatment.	72084	'Pigx'	Shared rhythmic genes in ELGs among NC, SiNPs, SD+SiNPs treatments
68299	'Vps53'	Unique rhythmic genes in ELGs of NC treatment.	67832	Brix1	Unique rhythmic genes in ELGs of SiNPs treatment.	30960	Vapa	Unique rhythmic genes in ELGs of SD+SiNPs treatment.	72168	'Aifm3'	Shared rhythmic genes in ELGs among NC, SiNPs, SD+SiNPs treatments
68328	'Rab13'	Unique rhythmic genes in ELGs of NC treatment.	67860	S100a16	Unique rhythmic genes in ELGs of SiNPs treatment.	50497	Hspa14	Unique rhythmic genes in ELGs of SD+SiNPs treatment.	72194	'Fbxl20'	Shared rhythmic genes in ELGs among NC, SiNPs, SD+SiNPs treatments
68364	'0610030E20Rik'	Unique rhythmic genes in ELGs of NC treatment.	67903	Gipc1	Unique rhythmic genes in ELGs of SiNPs treatment.	50753	Fbxo8	Unique rhythmic genes in ELGs of SD+SiNPs treatment.	72199	'Mms19'	Shared rhythmic genes in ELGs among NC, SiNPs, SD+SiNPs treatments
68472	'Tmem126b'	Unique rhythmic genes in ELGs of NC treatment.	67905	Ppm1m	Unique rhythmic genes in ELGs of SiNPs treatment.	50754	Fbxw7	Unique rhythmic genes in ELGs of SD+SiNPs treatment.	72282	'1810062G17Rik'	Shared rhythmic genes in ELGs among NC, SiNPs, SD+SiNPs treatments
68497	'Arel1'	Unique rhythmic genes in ELGs of NC treatment.	67945	Rpl41	Unique rhythmic genes in ELGs of SiNPs treatment.	50778	Rgs1	Unique rhythmic genes in ELGs of SD+SiNPs treatment.	72296	'Rusc1'	Shared rhythmic genes in ELGs among NC, SiNPs, SD+SiNPs treatments
68533	'Mphosph6'	Unique rhythmic genes in ELGs of NC treatment.	67971	Tppp3	Unique rhythmic genes in ELGs of SiNPs treatment.	50780	Rgs3	Unique rhythmic genes in ELGs of SD+SiNPs treatment.	72472	'Slc16a10'	Shared rhythmic genes in ELGs among NC, SiNPs, SD+SiNPs treatments
68565	'Mrps18a'	Unique rhythmic genes in ELGs of NC treatment.	67973	Mphosph10	Unique rhythmic genes in ELGs of SiNPs treatment.	50785	Hs6st1	Unique rhythmic genes in ELGs of SD+SiNPs treatment.	72475	'Ssbp3'	Shared rhythmic genes in ELGs among NC, SiNPs, SD+SiNPs treatments
68691	'Kansl1l'	Unique rhythmic genes in ELGs of NC treatment.	68031	Rnf146	Unique rhythmic genes in ELGs of SiNPs treatment.	50798	Gne	Unique rhythmic genes in ELGs of SD+SiNPs treatment.	72508	'Rps6kb1'	Shared rhythmic genes in ELGs among NC, SiNPs, SD+SiNPs treatments
68703	'Rere'	Unique rhythmic genes in ELGs of NC treatment.	68039	Nmb	Unique rhythmic genes in ELGs of SiNPs treatment.	50887	Hmgn5	Unique rhythmic genes in ELGs of SD+SiNPs treatment.	72692	'Hnrnpll'	Shared rhythmic genes in ELGs among NC, SiNPs, SD+SiNPs treatments
68744	'Zfp740'	Unique rhythmic genes in ELGs of NC treatment.	68041	Mid1ip1	Unique rhythmic genes in ELGs of SiNPs treatment.	50996	Pdcd7	Unique rhythmic genes in ELGs of SD+SiNPs treatment.	72701	'Zfp618'	Shared rhythmic genes in ELGs among NC, SiNPs, SD+SiNPs treatments
68778	'Gucd1'	Unique rhythmic genes in ELGs of NC treatment.	68047	Mpnd	Unique rhythmic genes in ELGs of SiNPs treatment.	52024	Ankrd22	Unique rhythmic genes in ELGs of SD+SiNPs treatment.	72709	'C1qtnf6'	Shared rhythmic genes in ELGs among NC, SiNPs, SD+SiNPs treatments
68839	'Ankrd46'	Unique rhythmic genes in ELGs of NC treatment.	68053	Ubxn2b	Unique rhythmic genes in ELGs of SiNPs treatment.	52118	Pvr	Unique rhythmic genes in ELGs of SD+SiNPs treatment.	72775	'Fance'	Shared rhythmic genes in ELGs among NC, SiNPs, SD+SiNPs treatments
68842	'Tulp4'	Unique rhythmic genes in ELGs of NC treatment.	68058	Chd1l	Unique rhythmic genes in ELGs of SiNPs treatment.	52120	Hgsnat	Unique rhythmic genes in ELGs of SD+SiNPs treatment.	72852	'Mblac2'	Shared rhythmic genes in ELGs among NC, SiNPs, SD+SiNPs treatments
68859	'Smim1'	Unique rhythmic genes in ELGs of NC treatment.	68079	Pdcd2l	Unique rhythmic genes in ELGs of SiNPs treatment.	52440	Tax1bp1	Unique rhythmic genes in ELGs of SD+SiNPs treatment.	73067	'Tmem192'	Shared rhythmic genes in ELGs among NC, SiNPs, SD+SiNPs treatments
68925	'Rpap1'	Unique rhythmic genes in ELGs of NC treatment.	68099	Fam92a	Unique rhythmic genes in ELGs of SiNPs treatment.	52477	Angel2	Unique rhythmic genes in ELGs of SD+SiNPs treatment.	73246	'Rassf6'	Shared rhythmic genes in ELGs among NC, SiNPs, SD+SiNPs treatments
68953	'Chmp2a'	Unique rhythmic genes in ELGs of NC treatment.	68149	Otub2	Unique rhythmic genes in ELGs of SiNPs treatment.	52521	Zfp622	Unique rhythmic genes in ELGs of SD+SiNPs treatment.	73680	'Zbtb8a'	Shared rhythmic genes in ELGs among NC, SiNPs, SD+SiNPs treatments
69038	'Tmem258'	Unique rhythmic genes in ELGs of NC treatment.	68193	Rpl24	Unique rhythmic genes in ELGs of SiNPs treatment.	52535	Mettl17	Unique rhythmic genes in ELGs of SD+SiNPs treatment.	73689	'Bloc1s2'	Shared rhythmic genes in ELGs among NC, SiNPs, SD+SiNPs treatments
69094	'Tmem160'	Unique rhythmic genes in ELGs of NC treatment.	68214	Gsto2	Unique rhythmic genes in ELGs of SiNPs treatment.	52552	Parp8	Unique rhythmic genes in ELGs of SD+SiNPs treatment.	73713	'Rbm20'	Shared rhythmic genes in ELGs among NC, SiNPs, SD+SiNPs treatments
69106	'Stoml1'	Unique rhythmic genes in ELGs of NC treatment.	68268	Zdhhc21	Unique rhythmic genes in ELGs of SiNPs treatment.	52626	Cdkn2aipnl	Unique rhythmic genes in ELGs of SD+SiNPs treatment.	73834	'Atp6v1d'	Shared rhythmic genes in ELGs among NC, SiNPs, SD+SiNPs treatments
69159	'Rhebl1'	Unique rhythmic genes in ELGs of NC treatment.	68291	Mto1	Unique rhythmic genes in ELGs of SiNPs treatment.	52685	Cd300lg	Unique rhythmic genes in ELGs of SD+SiNPs treatment.	73836	'Slc35b2'	Shared rhythmic genes in ELGs among NC, SiNPs, SD+SiNPs treatments
69178	'Snx5'	Unique rhythmic genes in ELGs of NC treatment.	68310	Zmym1	Unique rhythmic genes in ELGs of SiNPs treatment.	52696	Zwint	Unique rhythmic genes in ELGs of SD+SiNPs treatment.	74008	'Arsg'	Shared rhythmic genes in ELGs among NC, SiNPs, SD+SiNPs treatments
69179	'Stimate'	Unique rhythmic genes in ELGs of NC treatment.	68311	Lypd2	Unique rhythmic genes in ELGs of SiNPs treatment.	52829	Lurap1l	Unique rhythmic genes in ELGs of SD+SiNPs treatment.	74025	'Nphp3'	Shared rhythmic genes in ELGs among NC, SiNPs, SD+SiNPs treatments
69181	'Dyrk2'	Unique rhythmic genes in ELGs of NC treatment.	68327	Tsr3	Unique rhythmic genes in ELGs of SiNPs treatment.	53313	Atp2a3	Unique rhythmic genes in ELGs of SD+SiNPs treatment.	74080	'Nmnat3'	Shared rhythmic genes in ELGs among NC, SiNPs, SD+SiNPs treatments
69188	'Kmt2e'	Unique rhythmic genes in ELGs of NC treatment.	68385	Tlcd1	Unique rhythmic genes in ELGs of SiNPs treatment.	53319	Nxf1	Unique rhythmic genes in ELGs of SD+SiNPs treatment.	74134	'Cyp2s1'	Shared rhythmic genes in ELGs among NC, SiNPs, SD+SiNPs treatments
69237	'Gtpbp4'	Unique rhythmic genes in ELGs of NC treatment.	68401	G6pc3	Unique rhythmic genes in ELGs of SiNPs treatment.	53322	Nucb2	Unique rhythmic genes in ELGs of SD+SiNPs treatment.	74176	'Tgm5'	Shared rhythmic genes in ELGs among NC, SiNPs, SD+SiNPs treatments
69260	'Ing2'	Unique rhythmic genes in ELGs of NC treatment.	68458	Ppp1r14a	Unique rhythmic genes in ELGs of SiNPs treatment.	53323	Ube2k	Unique rhythmic genes in ELGs of SD+SiNPs treatment.	74277	'Chic2'	Shared rhythmic genes in ELGs among NC, SiNPs, SD+SiNPs treatments
69263	'Rfc3'	Unique rhythmic genes in ELGs of NC treatment.	68511	Dcdc2c	Unique rhythmic genes in ELGs of SiNPs treatment.	53378	Sdcbp	Unique rhythmic genes in ELGs of SD+SiNPs treatment.	74287	'Kcmf1'	Shared rhythmic genes in ELGs among NC, SiNPs, SD+SiNPs treatments
69459	'Ubl7'	Unique rhythmic genes in ELGs of NC treatment.	68556	Uckl1	Unique rhythmic genes in ELGs of SiNPs treatment.	53382	Txnl1	Unique rhythmic genes in ELGs of SD+SiNPs treatment.	74309	'Osbp2'	Shared rhythmic genes in ELGs among NC, SiNPs, SD+SiNPs treatments
69551	'2310022B05Rik'	Unique rhythmic genes in ELGs of NC treatment.	68614	Letmd1	Unique rhythmic genes in ELGs of SiNPs treatment.	53424	Tsnax	Unique rhythmic genes in ELGs of SD+SiNPs treatment.	74316	'Isca2'	Shared rhythmic genes in ELGs among NC, SiNPs, SD+SiNPs treatments
69574	'Cmbl'	Unique rhythmic genes in ELGs of NC treatment.	68743	Anln	Unique rhythmic genes in ELGs of SiNPs treatment.	53599	Cd164	Unique rhythmic genes in ELGs of SD+SiNPs treatment.	74325	'Cltb'	Shared rhythmic genes in ELGs among NC, SiNPs, SD+SiNPs treatments
69579	'2310034P14Rik'	Unique rhythmic genes in ELGs of NC treatment.	68758	Abhd11	Unique rhythmic genes in ELGs of SiNPs treatment.	53605	Nap1l1	Unique rhythmic genes in ELGs of SD+SiNPs treatment.	74360	'Cep57'	Shared rhythmic genes in ELGs among NC, SiNPs, SD+SiNPs treatments
69698	'Slc52a3'	Unique rhythmic genes in ELGs of NC treatment.	68796	Tmem214	Unique rhythmic genes in ELGs of SiNPs treatment.	53610	Nono	Unique rhythmic genes in ELGs of SD+SiNPs treatment.	74411	'Plpp6'	Shared rhythmic genes in ELGs among NC, SiNPs, SD+SiNPs treatments
69718	'Ipmk'	Unique rhythmic genes in ELGs of NC treatment.	68837	Foxk2	Unique rhythmic genes in ELGs of SiNPs treatment.	53625	B3gnt2	Unique rhythmic genes in ELGs of SD+SiNPs treatment.	74430	'4930452B06Rik'	Shared rhythmic genes in ELGs among NC, SiNPs, SD+SiNPs treatments
69780	'Smap2'	Unique rhythmic genes in ELGs of NC treatment.	68972	Tatdn3	Unique rhythmic genes in ELGs of SiNPs treatment.	53885	Nphp1	Unique rhythmic genes in ELGs of SD+SiNPs treatment.	74453	'Cfap53'	Shared rhythmic genes in ELGs among NC, SiNPs, SD+SiNPs treatments
69807	'Trim32'	Unique rhythmic genes in ELGs of NC treatment.	69048	Slc30a5	Unique rhythmic genes in ELGs of SiNPs treatment.	54004	Diaph2	Unique rhythmic genes in ELGs of SD+SiNPs treatment.	74551	'Pck2'	Shared rhythmic genes in ELGs among NC, SiNPs, SD+SiNPs treatments
69890	'Zfp219'	Unique rhythmic genes in ELGs of NC treatment.	69064	Fuom	Unique rhythmic genes in ELGs of SiNPs treatment.	54124	Cks1b	Unique rhythmic genes in ELGs of SD+SiNPs treatment.	74616	'Scrn3'	Shared rhythmic genes in ELGs among NC, SiNPs, SD+SiNPs treatments
69922	'Vrk2'	Unique rhythmic genes in ELGs of NC treatment.	69071	Tmem97	Unique rhythmic genes in ELGs of SiNPs treatment.	54137	Acrbp	Unique rhythmic genes in ELGs of SD+SiNPs treatment.	74741	'C2cd5'	Shared rhythmic genes in ELGs among NC, SiNPs, SD+SiNPs treatments
69944	'2810021J22Rik'	Unique rhythmic genes in ELGs of NC treatment.	69077	Psmd11	Unique rhythmic genes in ELGs of SiNPs treatment.	54160	Copg2	Unique rhythmic genes in ELGs of SD+SiNPs treatment.	74763	'Naa60'	Shared rhythmic genes in ELGs among NC, SiNPs, SD+SiNPs treatments
70020	'Ino80b'	Unique rhythmic genes in ELGs of NC treatment.	69116	Ubr4	Unique rhythmic genes in ELGs of SiNPs treatment.	54170	Rragc	Unique rhythmic genes in ELGs of SD+SiNPs treatment.	74776	'Ppa2'	Shared rhythmic genes in ELGs among NC, SiNPs, SD+SiNPs treatments
70103	'Znhit1'	Unique rhythmic genes in ELGs of NC treatment.	69165	Cd209b	Unique rhythmic genes in ELGs of SiNPs treatment.	54188	Cpsf4	Unique rhythmic genes in ELGs of SD+SiNPs treatment.	74978	'Lrriq1'	Shared rhythmic genes in ELGs among NC, SiNPs, SD+SiNPs treatments
70122	'Mllt3'	Unique rhythmic genes in ELGs of NC treatment.	69202	Ptms	Unique rhythmic genes in ELGs of SiNPs treatment.	54198	Snx3	Unique rhythmic genes in ELGs of SD+SiNPs treatment.	75007	'Mindy1'	Shared rhythmic genes in ELGs among NC, SiNPs, SD+SiNPs treatments
70373	'Gpatch2l'	Unique rhythmic genes in ELGs of NC treatment.	69215	Sat2	Unique rhythmic genes in ELGs of SiNPs treatment.	54201	Zfp316	Unique rhythmic genes in ELGs of SD+SiNPs treatment.	75019	'Rnase10'	Shared rhythmic genes in ELGs among NC, SiNPs, SD+SiNPs treatments
70408	'Polr3f'	Unique rhythmic genes in ELGs of NC treatment.	69216	Svbp	Unique rhythmic genes in ELGs of SiNPs treatment.	54393	Gabbr1	Unique rhythmic genes in ELGs of SD+SiNPs treatment.	75422	'Mettl5'	Shared rhythmic genes in ELGs among NC, SiNPs, SD+SiNPs treatments
70495	'Atp6ap2'	Unique rhythmic genes in ELGs of NC treatment.	69234	Zfp688	Unique rhythmic genes in ELGs of SiNPs treatment.	54409	Ramp2	Unique rhythmic genes in ELGs of SD+SiNPs treatment.	75497	'Fabp12'	Shared rhythmic genes in ELGs among NC, SiNPs, SD+SiNPs treatments
70556	'Slc25a33'	Unique rhythmic genes in ELGs of NC treatment.	69282	1700001J03Rik	Unique rhythmic genes in ELGs of SiNPs treatment.	54632	Ftsj1	Unique rhythmic genes in ELGs of SD+SiNPs treatment.	75607	'Wnk2'	Shared rhythmic genes in ELGs among NC, SiNPs, SD+SiNPs treatments
70591	'5730455P16Rik'	Unique rhythmic genes in ELGs of NC treatment.	69386	H2c8	Unique rhythmic genes in ELGs of SiNPs treatment.	54637	Praf2	Unique rhythmic genes in ELGs of SD+SiNPs treatment.	75620	'Kxd1'	Shared rhythmic genes in ELGs among NC, SiNPs, SD+SiNPs treatments
70661	'Sik3'	Unique rhythmic genes in ELGs of NC treatment.	69440	Dennd6b	Unique rhythmic genes in ELGs of SiNPs treatment.	54670	Atp8b1	Unique rhythmic genes in ELGs of SD+SiNPs treatment.	75659	'Wdr54'	Shared rhythmic genes in ELGs among NC, SiNPs, SD+SiNPs treatments
70686	'Dusp16'	Unique rhythmic genes in ELGs of NC treatment.	69479	1700029J07Rik	Unique rhythmic genes in ELGs of SiNPs treatment.	54721	Tyk2	Unique rhythmic genes in ELGs of SD+SiNPs treatment.	75697	'C2cd4b'	Shared rhythmic genes in ELGs among NC, SiNPs, SD+SiNPs treatments
70717	'Medag'	Unique rhythmic genes in ELGs of NC treatment.	69536	Hemk1	Unique rhythmic genes in ELGs of SiNPs treatment.	54725	Cadm1	Unique rhythmic genes in ELGs of SD+SiNPs treatment.	75725	'Phf14'	Shared rhythmic genes in ELGs among NC, SiNPs, SD+SiNPs treatments
70750	'Kdsr'	Unique rhythmic genes in ELGs of NC treatment.	69601	Dab2ip	Unique rhythmic genes in ELGs of SiNPs treatment.	55948	Sfn	Unique rhythmic genes in ELGs of SD+SiNPs treatment.	75767	'Rab11fip1'	Shared rhythmic genes in ELGs among NC, SiNPs, SD+SiNPs treatments
70767	'Prpf3'	Unique rhythmic genes in ELGs of NC treatment.	69608	Sec24d	Unique rhythmic genes in ELGs of SiNPs treatment.	55980	Impa1	Unique rhythmic genes in ELGs of SD+SiNPs treatment.	75785	'Klhl24'	Shared rhythmic genes in ELGs among NC, SiNPs, SD+SiNPs treatments
70791	'Hars2'	Unique rhythmic genes in ELGs of NC treatment.	69668	Ccdc115	Unique rhythmic genes in ELGs of SiNPs treatment.	56044	Rala	Unique rhythmic genes in ELGs of SD+SiNPs treatment.	75973	'Ccdc162'	Shared rhythmic genes in ELGs among NC, SiNPs, SD+SiNPs treatments
70799	'Cep192'	Unique rhythmic genes in ELGs of NC treatment.	69700	Col22a1	Unique rhythmic genes in ELGs of SiNPs treatment.	56047	Msln	Unique rhythmic genes in ELGs of SD+SiNPs treatment.	76044	'Ncapg2'	Shared rhythmic genes in ELGs among NC, SiNPs, SD+SiNPs treatments
70823	'Hmgxb4'	Unique rhythmic genes in ELGs of NC treatment.	69719	Cad	Unique rhythmic genes in ELGs of SiNPs treatment.	56078	Car5b	Unique rhythmic genes in ELGs of SD+SiNPs treatment.	76187	'Adhfe1'	Shared rhythmic genes in ELGs among NC, SiNPs, SD+SiNPs treatments
70829	'Ccdc93'	Unique rhythmic genes in ELGs of NC treatment.	69723	Rpain	Unique rhythmic genes in ELGs of SiNPs treatment.	56175	Bace2	Unique rhythmic genes in ELGs of SD+SiNPs treatment.	76192	'Abhd12'	Shared rhythmic genes in ELGs among NC, SiNPs, SD+SiNPs treatments
70834	'Spag9'	Unique rhythmic genes in ELGs of NC treatment.	69740	Dph5	Unique rhythmic genes in ELGs of SiNPs treatment.	56205	Ensa	Unique rhythmic genes in ELGs of SD+SiNPs treatment.	76454	'Fbxo31'	Shared rhythmic genes in ELGs among NC, SiNPs, SD+SiNPs treatments
70999	'Naa40'	Unique rhythmic genes in ELGs of NC treatment.	69745	Pold4	Unique rhythmic genes in ELGs of SiNPs treatment.	56207	Uchl5	Unique rhythmic genes in ELGs of SD+SiNPs treatment.	76491	'Abhd14b'	Shared rhythmic genes in ELGs among NC, SiNPs, SD+SiNPs treatments
71003	'Prss41'	Unique rhythmic genes in ELGs of NC treatment.	69815	Krtcap3	Unique rhythmic genes in ELGs of SiNPs treatment.	56218	Patz1	Unique rhythmic genes in ELGs of SD+SiNPs treatment.	76524	'Cln6'	Shared rhythmic genes in ELGs among NC, SiNPs, SD+SiNPs treatments
71101	'Uvssa'	Unique rhythmic genes in ELGs of NC treatment.	69833	Polr2f	Unique rhythmic genes in ELGs of SiNPs treatment.	56273	Pex14	Unique rhythmic genes in ELGs of SD+SiNPs treatment.	76539	'Fam204a'	Shared rhythmic genes in ELGs among NC, SiNPs, SD+SiNPs treatments
71111	'Gpr39'	Unique rhythmic genes in ELGs of NC treatment.	69837	Pcgf1	Unique rhythmic genes in ELGs of SiNPs treatment.	56291	Styx	Unique rhythmic genes in ELGs of SD+SiNPs treatment.	76568	'Ift46'	Shared rhythmic genes in ELGs among NC, SiNPs, SD+SiNPs treatments
71228	'Dlg5'	Unique rhythmic genes in ELGs of NC treatment.	69994	Rsc1a1	Unique rhythmic genes in ELGs of SiNPs treatment.	56298	Atl2	Unique rhythmic genes in ELGs of SD+SiNPs treatment.	76824	'Mtfr1l'	Shared rhythmic genes in ELGs among NC, SiNPs, SD+SiNPs treatments
71279	'Slc29a3'	Unique rhythmic genes in ELGs of NC treatment.	70031	Cmtm8	Unique rhythmic genes in ELGs of SiNPs treatment.	56306	Sinhcaf	Unique rhythmic genes in ELGs of SD+SiNPs treatment.	76900	'Ssbp4'	Shared rhythmic genes in ELGs among NC, SiNPs, SD+SiNPs treatments
71367	'Chst9'	Unique rhythmic genes in ELGs of NC treatment.	70044	Tut1	Unique rhythmic genes in ELGs of SiNPs treatment.	56309	Mycbp	Unique rhythmic genes in ELGs of SD+SiNPs treatment.	77015	'Mpped2'	Shared rhythmic genes in ELGs among NC, SiNPs, SD+SiNPs treatments
71371	'Arid5b'	Unique rhythmic genes in ELGs of NC treatment.	70118	Srrd	Unique rhythmic genes in ELGs of SiNPs treatment.	56334	Tmed2	Unique rhythmic genes in ELGs of SD+SiNPs treatment.	77300	'Raph1'	Shared rhythmic genes in ELGs among NC, SiNPs, SD+SiNPs treatments
71382	'Pex1'	Unique rhythmic genes in ELGs of NC treatment.	70153	2210016F16Rik	Unique rhythmic genes in ELGs of SiNPs treatment.	56347	Eif3c	Unique rhythmic genes in ELGs of SD+SiNPs treatment.	77569	'Limch1'	Shared rhythmic genes in ELGs among NC, SiNPs, SD+SiNPs treatments
71448	'Tmem80'	Unique rhythmic genes in ELGs of NC treatment.	70218	Kif18b	Unique rhythmic genes in ELGs of SiNPs treatment.	56358	Copz2	Unique rhythmic genes in ELGs of SD+SiNPs treatment.	77805	'Esco1'	Shared rhythmic genes in ELGs among NC, SiNPs, SD+SiNPs treatments
71474	'Ppp6r2'	Unique rhythmic genes in ELGs of NC treatment.	70247	Psmd1	Unique rhythmic genes in ELGs of SiNPs treatment.	56361	Pus1	Unique rhythmic genes in ELGs of SD+SiNPs treatment.	78004	'Prr15'	Shared rhythmic genes in ELGs among NC, SiNPs, SD+SiNPs treatments
71592	'Pogk'	Unique rhythmic genes in ELGs of NC treatment.	70300	Fuz	Unique rhythmic genes in ELGs of SiNPs treatment.	56376	Pdlim5	Unique rhythmic genes in ELGs of SD+SiNPs treatment.	78249	'Adgrf4'	Shared rhythmic genes in ELGs among NC, SiNPs, SD+SiNPs treatments
71640	'Zfp949'	Unique rhythmic genes in ELGs of NC treatment.	70325	Pigw	Unique rhythmic genes in ELGs of SiNPs treatment.	56382	Rab9	Unique rhythmic genes in ELGs of SD+SiNPs treatment.	78748	'Rassf10'	Shared rhythmic genes in ELGs among NC, SiNPs, SD+SiNPs treatments
71648	'Optn'	Unique rhythmic genes in ELGs of NC treatment.	70377	Derl3	Unique rhythmic genes in ELGs of SiNPs treatment.	56395	Tmem115	Unique rhythmic genes in ELGs of SD+SiNPs treatment.	78751	'Zc3h6'	Shared rhythmic genes in ELGs among NC, SiNPs, SD+SiNPs treatments
71653	'Shtn1'	Unique rhythmic genes in ELGs of NC treatment.	70420	Arpin	Unique rhythmic genes in ELGs of SiNPs treatment.	56409	Nudt3	Unique rhythmic genes in ELGs of SD+SiNPs treatment.	78834	'Zfp623'	Shared rhythmic genes in ELGs among NC, SiNPs, SD+SiNPs treatments
71704	'Arhgef3'	Unique rhythmic genes in ELGs of NC treatment.	70432	Rufy2	Unique rhythmic genes in ELGs of SiNPs treatment.	56426	Pdcd10	Unique rhythmic genes in ELGs of SD+SiNPs treatment.	79362	'Bhlhe41'	Shared rhythmic genes in ELGs among NC, SiNPs, SD+SiNPs treatments
71710	'Lrrcc1'	Unique rhythmic genes in ELGs of NC treatment.	70461	Crtc3	Unique rhythmic genes in ELGs of SiNPs treatment.	56438	Rbx1	Unique rhythmic genes in ELGs of SD+SiNPs treatment.	79565	'Mettl27'	Shared rhythmic genes in ELGs among NC, SiNPs, SD+SiNPs treatments
71715	'Dhx35'	Unique rhythmic genes in ELGs of NC treatment.	70503	Ddo	Unique rhythmic genes in ELGs of SiNPs treatment.	56440	Snx1	Unique rhythmic genes in ELGs of SD+SiNPs treatment.	80748	'BC004004'	Shared rhythmic genes in ELGs among NC, SiNPs, SD+SiNPs treatments
71733	'Susd2'	Unique rhythmic genes in ELGs of NC treatment.	70599	Itprid2	Unique rhythmic genes in ELGs of SiNPs treatment.	56442	Serinc1	Unique rhythmic genes in ELGs of SD+SiNPs treatment.	80837	'Rhoj'	Shared rhythmic genes in ELGs among NC, SiNPs, SD+SiNPs treatments
71751	'Map3k13'	Unique rhythmic genes in ELGs of NC treatment.	70611	Fbxo33	Unique rhythmic genes in ELGs of SiNPs treatment.	56451	Suclg1	Unique rhythmic genes in ELGs of SD+SiNPs treatment.	80877	'Lrba'	Shared rhythmic genes in ELGs among NC, SiNPs, SD+SiNPs treatments
71765	'Klhdc3'	Unique rhythmic genes in ELGs of NC treatment.	70612	Tmem230	Unique rhythmic genes in ELGs of SiNPs treatment.	56455	Dynll1	Unique rhythmic genes in ELGs of SD+SiNPs treatment.	80884	'Maged2'	Shared rhythmic genes in ELGs among NC, SiNPs, SD+SiNPs treatments
71777	'Ing3'	Unique rhythmic genes in ELGs of NC treatment.	70615	Ankrd24	Unique rhythmic genes in ELGs of SiNPs treatment.	56458	Foxo1	Unique rhythmic genes in ELGs of SD+SiNPs treatment.	80886	'Senp3'	Shared rhythmic genes in ELGs among NC, SiNPs, SD+SiNPs treatments
71780	'Isyna1'	Unique rhythmic genes in ELGs of NC treatment.	70681	Abraxas1	Unique rhythmic genes in ELGs of SiNPs treatment.	56459	Sae1	Unique rhythmic genes in ELGs of SD+SiNPs treatment.	81003	'Trim23'	Shared rhythmic genes in ELGs among NC, SiNPs, SD+SiNPs treatments
71816	'Rnf180'	Unique rhythmic genes in ELGs of NC treatment.	70683	Utp20	Unique rhythmic genes in ELGs of SiNPs treatment.	56462	Mtch1	Unique rhythmic genes in ELGs of SD+SiNPs treatment.	81489	'Dnajb1'	Shared rhythmic genes in ELGs among NC, SiNPs, SD+SiNPs treatments
71835	'Lancl2'	Unique rhythmic genes in ELGs of NC treatment.	70713	Gpr137c	Unique rhythmic genes in ELGs of SiNPs treatment.	56480	Tbk1	Unique rhythmic genes in ELGs of SD+SiNPs treatment.	83602	'Gtf2a1'	Shared rhythmic genes in ELGs among NC, SiNPs, SD+SiNPs treatments
71932	'Ephx3'	Unique rhythmic genes in ELGs of NC treatment.	70796	Zdhhc1	Unique rhythmic genes in ELGs of SiNPs treatment.	56491	Vapb	Unique rhythmic genes in ELGs of SD+SiNPs treatment.	83669	'Wdr6'	Shared rhythmic genes in ELGs among NC, SiNPs, SD+SiNPs treatments
71943	'Tom1l1'	Unique rhythmic genes in ELGs of NC treatment.	70802	Pwwp2a	Unique rhythmic genes in ELGs of SiNPs treatment.	56700	Glmp	Unique rhythmic genes in ELGs of SD+SiNPs treatment.	83672	'Sytl3'	Shared rhythmic genes in ELGs among NC, SiNPs, SD+SiNPs treatments
71947	'Tmem94'	Unique rhythmic genes in ELGs of NC treatment.	70846	Ttc6	Unique rhythmic genes in ELGs of SiNPs treatment.	56706	Ccnl1	Unique rhythmic genes in ELGs of SD+SiNPs treatment.	83674	'Cnnm1'	Shared rhythmic genes in ELGs among NC, SiNPs, SD+SiNPs treatments
71966	'Nkiras2'	Unique rhythmic genes in ELGs of NC treatment.	70885	Ints10	Unique rhythmic genes in ELGs of SiNPs treatment.	56726	Sh3bgrl	Unique rhythmic genes in ELGs of SD+SiNPs treatment.	83796	'Smarcd2'	Shared rhythmic genes in ELGs among NC, SiNPs, SD+SiNPs treatments
72033	'Tsc22d2'	Unique rhythmic genes in ELGs of NC treatment.	70930	Nol8	Unique rhythmic genes in ELGs of SiNPs treatment.	56734	Tulp2	Unique rhythmic genes in ELGs of SD+SiNPs treatment.	83961	'Nrg4'	Shared rhythmic genes in ELGs among NC, SiNPs, SD+SiNPs treatments
72047	'Ddx42'	Unique rhythmic genes in ELGs of NC treatment.	71091	Cdkl1	Unique rhythmic genes in ELGs of SiNPs treatment.	56736	Rnf14	Unique rhythmic genes in ELGs of SD+SiNPs treatment.	93707	'Pcdhgc4'	Shared rhythmic genes in ELGs among NC, SiNPs, SD+SiNPs treatments
72085	'Osgepl1'	Unique rhythmic genes in ELGs of NC treatment.	71116	Stx18	Unique rhythmic genes in ELGs of SiNPs treatment.	56795	Arl10	Unique rhythmic genes in ELGs of SD+SiNPs treatment.	93730	'Lztfl1'	Shared rhythmic genes in ELGs among NC, SiNPs, SD+SiNPs treatments
72128	'2610008E11Rik'	Unique rhythmic genes in ELGs of NC treatment.	71151	Eri2	Unique rhythmic genes in ELGs of SiNPs treatment.	56873	Lmbr1	Unique rhythmic genes in ELGs of SD+SiNPs treatment.	93747	'Echs1'	Shared rhythmic genes in ELGs among NC, SiNPs, SD+SiNPs treatments
72133	'Trub1'	Unique rhythmic genes in ELGs of NC treatment.	71242	Spata24	Unique rhythmic genes in ELGs of SiNPs treatment.	57247	Zfp276	Unique rhythmic genes in ELGs of SD+SiNPs treatment.	94179	'Krt23'	Shared rhythmic genes in ELGs among NC, SiNPs, SD+SiNPs treatments
72139	'2610044O15Rik8'	Unique rhythmic genes in ELGs of NC treatment.	71393	Kctd6	Unique rhythmic genes in ELGs of SiNPs treatment.	57257	Vav3	Unique rhythmic genes in ELGs of SD+SiNPs treatment.	97165	'Hmgb2'	Shared rhythmic genes in ELGs among NC, SiNPs, SD+SiNPs treatments
72140	'Cep89'	Unique rhythmic genes in ELGs of NC treatment.	71449	Eef1aknmt	Unique rhythmic genes in ELGs of SiNPs treatment.	57275	Lenep	Unique rhythmic genes in ELGs of SD+SiNPs treatment.	98999	'Znfx1'	Shared rhythmic genes in ELGs among NC, SiNPs, SD+SiNPs treatments
72155	'Cenpn'	Unique rhythmic genes in ELGs of NC treatment.	71566	Clmp	Unique rhythmic genes in ELGs of SiNPs treatment.	57316	C1d	Unique rhythmic genes in ELGs of SD+SiNPs treatment.	100019	'Mdn1'	Shared rhythmic genes in ELGs among NC, SiNPs, SD+SiNPs treatments
72184	'Klhl35'	Unique rhythmic genes in ELGs of NC treatment.	71586	Ifih1	Unique rhythmic genes in ELGs of SiNPs treatment.	57319	Smpdl3a	Unique rhythmic genes in ELGs of SD+SiNPs treatment.	100087	'Kti12'	Shared rhythmic genes in ELGs among NC, SiNPs, SD+SiNPs treatments
72190	'2510009E07Rik'	Unique rhythmic genes in ELGs of NC treatment.	71591	Zfp251	Unique rhythmic genes in ELGs of SiNPs treatment.	57342	Parva	Unique rhythmic genes in ELGs of SD+SiNPs treatment.	100163	'Pafah2'	Shared rhythmic genes in ELGs among NC, SiNPs, SD+SiNPs treatments
72267	'Lrrc8e'	Unique rhythmic genes in ELGs of NC treatment.	71703	Armcx3	Unique rhythmic genes in ELGs of SiNPs treatment.	57434	Xrcc2	Unique rhythmic genes in ELGs of SD+SiNPs treatment.	100342	'Tent5b'	Shared rhythmic genes in ELGs among NC, SiNPs, SD+SiNPs treatments
72290	'Lsm11'	Unique rhythmic genes in ELGs of NC treatment.	71721	Fam13c	Unique rhythmic genes in ELGs of SiNPs treatment.	57811	Rgr	Unique rhythmic genes in ELGs of SD+SiNPs treatment.	100434	'Slc44a1'	Shared rhythmic genes in ELGs among NC, SiNPs, SD+SiNPs treatments
72306	'Zfp777'	Unique rhythmic genes in ELGs of NC treatment.	71735	Lrwd1	Unique rhythmic genes in ELGs of SiNPs treatment.	57896	Krcc1	Unique rhythmic genes in ELGs of SD+SiNPs treatment.	100678	'Psph'	Shared rhythmic genes in ELGs among NC, SiNPs, SD+SiNPs treatments
72393	'Faim2'	Unique rhythmic genes in ELGs of NC treatment.	71742	Ulk3	Unique rhythmic genes in ELGs of SiNPs treatment.	57908	Zfp318	Unique rhythmic genes in ELGs of SD+SiNPs treatment.	100689	'Spon2'	Shared rhythmic genes in ELGs among NC, SiNPs, SD+SiNPs treatments
72399	'Brap'	Unique rhythmic genes in ELGs of NC treatment.	71764	C2cd2l	Unique rhythmic genes in ELGs of SiNPs treatment.	58184	Cnot9	Unique rhythmic genes in ELGs of SD+SiNPs treatment.	100900	'Hscb'	Shared rhythmic genes in ELGs among NC, SiNPs, SD+SiNPs treatments
72401	'Slc43a1'	Unique rhythmic genes in ELGs of NC treatment.	71797	Chst13	Unique rhythmic genes in ELGs of SiNPs treatment.	58185	Rsad2	Unique rhythmic genes in ELGs of SD+SiNPs treatment.	101476	'Plekha1'	Shared rhythmic genes in ELGs among NC, SiNPs, SD+SiNPs treatments
72477	'Tmem87b'	Unique rhythmic genes in ELGs of NC treatment.	71862	Gpr160	Unique rhythmic genes in ELGs of SiNPs treatment.	58186	Rad18	Unique rhythmic genes in ELGs of SD+SiNPs treatment.	101700	'Trim68'	Shared rhythmic genes in ELGs among NC, SiNPs, SD+SiNPs treatments
72507	'Dzip1l'	Unique rhythmic genes in ELGs of NC treatment.	71901	Fam219a	Unique rhythmic genes in ELGs of SiNPs treatment.	58193	Extl2	Unique rhythmic genes in ELGs of SD+SiNPs treatment.	102032	'Smim19'	Shared rhythmic genes in ELGs among NC, SiNPs, SD+SiNPs treatments
72544	'Exosc6'	Unique rhythmic genes in ELGs of NC treatment.	71904	Paqr7	Unique rhythmic genes in ELGs of SiNPs treatment.	58220	Pard6b	Unique rhythmic genes in ELGs of SD+SiNPs treatment.	102115	'Dohh'	Shared rhythmic genes in ELGs among NC, SiNPs, SD+SiNPs treatments
72552	'Hsdl1'	Unique rhythmic genes in ELGs of NC treatment.	71908	Cldn23	Unique rhythmic genes in ELGs of SiNPs treatment.	58521	Eid1	Unique rhythmic genes in ELGs of SD+SiNPs treatment.	102462	'Imp3'	Shared rhythmic genes in ELGs among NC, SiNPs, SD+SiNPs treatments
72554	'Utp14a'	Unique rhythmic genes in ELGs of NC treatment.	71954	Suds3	Unique rhythmic genes in ELGs of SiNPs treatment.	58801	Pmaip1	Unique rhythmic genes in ELGs of SD+SiNPs treatment.	102954	'Nudt10'	Shared rhythmic genes in ELGs among NC, SiNPs, SD+SiNPs treatments
72567	'Bclaf1'	Unique rhythmic genes in ELGs of NC treatment.	71971	Zswim1	Unique rhythmic genes in ELGs of SiNPs treatment.	58860	Adamdec1	Unique rhythmic genes in ELGs of SD+SiNPs treatment.	103149	'Upb1'	Shared rhythmic genes in ELGs among NC, SiNPs, SD+SiNPs treatments
72667	'Zfp444'	Unique rhythmic genes in ELGs of NC treatment.	72080	Sapcd2	Unique rhythmic genes in ELGs of SiNPs treatment.	58875	Hibadh	Unique rhythmic genes in ELGs of SD+SiNPs treatment.	103537	'Mbtd1'	Shared rhythmic genes in ELGs among NC, SiNPs, SD+SiNPs treatments
72736	'Tmx1'	Unique rhythmic genes in ELGs of NC treatment.	72096	Eef1akmt2	Unique rhythmic genes in ELGs of SiNPs treatment.	58909	Fam13a	Unique rhythmic genes in ELGs of SD+SiNPs treatment.	103711	'Pnpo'	Shared rhythmic genes in ELGs among NC, SiNPs, SD+SiNPs treatments
72795	'Ttc19'	Unique rhythmic genes in ELGs of NC treatment.	72107	Dscc1	Unique rhythmic genes in ELGs of SiNPs treatment.	58911	Sumf1	Unique rhythmic genes in ELGs of SD+SiNPs treatment.	103844	'Inca1'	Shared rhythmic genes in ELGs among NC, SiNPs, SD+SiNPs treatments
72873	'Bbof1'	Unique rhythmic genes in ELGs of NC treatment.	72108	Ddhd2	Unique rhythmic genes in ELGs of SiNPs treatment.	59001	Pole3	Unique rhythmic genes in ELGs of SD+SiNPs treatment.	104158	'Ces1d'	Shared rhythmic genes in ELGs among NC, SiNPs, SD+SiNPs treatments
72947	'Phykpl'	Unique rhythmic genes in ELGs of NC treatment.	72119	Tpx2	Unique rhythmic genes in ELGs of SiNPs treatment.	59004	Pias4	Unique rhythmic genes in ELGs of SD+SiNPs treatment.	104458	'Rars'	Shared rhythmic genes in ELGs among NC, SiNPs, SD+SiNPs treatments
72993	'Appl1'	Unique rhythmic genes in ELGs of NC treatment.	72167	Thumpd2	Unique rhythmic genes in ELGs of SiNPs treatment.	59007	Ngly1	Unique rhythmic genes in ELGs of SD+SiNPs treatment.	104681	'Slc16a6'	Shared rhythmic genes in ELGs among NC, SiNPs, SD+SiNPs treatments
73192	'Xpot'	Unique rhythmic genes in ELGs of NC treatment.	72170	Chchd4	Unique rhythmic genes in ELGs of SiNPs treatment.	59008	Anapc5	Unique rhythmic genes in ELGs of SD+SiNPs treatment.	104725	'Sptssa'	Shared rhythmic genes in ELGs among NC, SiNPs, SD+SiNPs treatments
73229	'Zfp983'	Unique rhythmic genes in ELGs of NC treatment.	72308	Brf1	Unique rhythmic genes in ELGs of SiNPs treatment.	59012	Moxd1	Unique rhythmic genes in ELGs of SD+SiNPs treatment.	105352	'Dusp22'	Shared rhythmic genes in ELGs among NC, SiNPs, SD+SiNPs treatments
73451	'Zfp763'	Unique rhythmic genes in ELGs of NC treatment.	72324	Plxdc1	Unique rhythmic genes in ELGs of SiNPs treatment.	59041	Stk25	Unique rhythmic genes in ELGs of SD+SiNPs treatment.	106347	'Ildr1'	Shared rhythmic genes in ELGs among NC, SiNPs, SD+SiNPs treatments
73608	'Marveld3'	Unique rhythmic genes in ELGs of NC treatment.	72330	Klhl40	Unique rhythmic genes in ELGs of SiNPs treatment.	59045	Stard3	Unique rhythmic genes in ELGs of SD+SiNPs treatment.	106581	'Fam234a'	Shared rhythmic genes in ELGs among NC, SiNPs, SD+SiNPs treatments
73656	'Ms4a6c'	Unique rhythmic genes in ELGs of NC treatment.	72341	Elp6	Unique rhythmic genes in ELGs of SiNPs treatment.	59093	Pcbp3	Unique rhythmic genes in ELGs of SD+SiNPs treatment.	106766	'Stap2'	Shared rhythmic genes in ELGs among NC, SiNPs, SD+SiNPs treatments
73658	'Spns1'	Unique rhythmic genes in ELGs of NC treatment.	72350	Zc2hc1c	Unique rhythmic genes in ELGs of SiNPs treatment.	59125	Nek7	Unique rhythmic genes in ELGs of SD+SiNPs treatment.	106821	'Oard1'	Shared rhythmic genes in ELGs among NC, SiNPs, SD+SiNPs treatments
73673	'Rec114'	Unique rhythmic genes in ELGs of NC treatment.	72357	2210016L21Rik	Unique rhythmic genes in ELGs of SiNPs treatment.	59288	Dctn5	Unique rhythmic genes in ELGs of SD+SiNPs treatment.	107271	'Yars'	Shared rhythmic genes in ELGs among NC, SiNPs, SD+SiNPs treatments
73728	'Psd'	Unique rhythmic genes in ELGs of NC treatment.	72391	Cdkn3	Unique rhythmic genes in ELGs of SiNPs treatment.	60530	Fignl1	Unique rhythmic genes in ELGs of SD+SiNPs treatment.	107272	'Psat1'	Shared rhythmic genes in ELGs among NC, SiNPs, SD+SiNPs treatments
73739	'Cby1'	Unique rhythmic genes in ELGs of NC treatment.	72415	Sgo1	Unique rhythmic genes in ELGs of SiNPs treatment.	63985	Gmfb	Unique rhythmic genes in ELGs of SD+SiNPs treatment.	107476	'Acaca'	Shared rhythmic genes in ELGs among NC, SiNPs, SD+SiNPs treatments
73822	'Mfsd12'	Unique rhythmic genes in ELGs of NC treatment.	72446	Prr5l	Unique rhythmic genes in ELGs of SiNPs treatment.	64074	Smoc2	Unique rhythmic genes in ELGs of SD+SiNPs treatment.	107477	'Guca1b'	Shared rhythmic genes in ELGs among NC, SiNPs, SD+SiNPs treatments
73833	'Fam98c'	Unique rhythmic genes in ELGs of NC treatment.	72482	Acbd6	Unique rhythmic genes in ELGs of SiNPs treatment.	64136	Sdf2l1	Unique rhythmic genes in ELGs of SD+SiNPs treatment.	107503	'Atf5'	Shared rhythmic genes in ELGs among NC, SiNPs, SD+SiNPs treatments
73919	'Lyrm1'	Unique rhythmic genes in ELGs of NC treatment.	72514	Fgfbp3	Unique rhythmic genes in ELGs of SiNPs treatment.	64176	Sv2b	Unique rhythmic genes in ELGs of SD+SiNPs treatment.	107684	'Coro2a'	Shared rhythmic genes in ELGs among NC, SiNPs, SD+SiNPs treatments
74011	'Slc25a27'	Unique rhythmic genes in ELGs of NC treatment.	72549	Reep4	Unique rhythmic genes in ELGs of SiNPs treatment.	64177	Trpv6	Unique rhythmic genes in ELGs of SD+SiNPs treatment.	107747	'Aldh1l1'	Shared rhythmic genes in ELGs among NC, SiNPs, SD+SiNPs treatments
74026	'Msl1'	Unique rhythmic genes in ELGs of NC treatment.	72562	Pcbd2	Unique rhythmic genes in ELGs of SiNPs treatment.	64291	Osbpl1a	Unique rhythmic genes in ELGs of SD+SiNPs treatment.	107817	'Jmjd6'	Shared rhythmic genes in ELGs among NC, SiNPs, SD+SiNPs treatments
74125	'Armc8'	Unique rhythmic genes in ELGs of NC treatment.	72569	Bbs5	Unique rhythmic genes in ELGs of SiNPs treatment.	64292	Ptges	Unique rhythmic genes in ELGs of SD+SiNPs treatment.	107869	'Cth'	Shared rhythmic genes in ELGs among NC, SiNPs, SD+SiNPs treatments
74147	'Ehhadh'	Unique rhythmic genes in ELGs of NC treatment.	72599	Pdia5	Unique rhythmic genes in ELGs of SiNPs treatment.	64899	Lpin3	Unique rhythmic genes in ELGs of SD+SiNPs treatment.	107976	'Babam2'	Shared rhythmic genes in ELGs among NC, SiNPs, SD+SiNPs treatments
74238	'Mterf2'	Unique rhythmic genes in ELGs of NC treatment.	72630	Hspa12b	Unique rhythmic genes in ELGs of SiNPs treatment.	64933	Ap3m2	Unique rhythmic genes in ELGs of SD+SiNPs treatment.	108037	'Shmt2'	Shared rhythmic genes in ELGs among NC, SiNPs, SD+SiNPs treatments
74268	'Aven'	Unique rhythmic genes in ELGs of NC treatment.	72635	Lins1	Unique rhythmic genes in ELGs of SiNPs treatment.	65114	Vps35	Unique rhythmic genes in ELGs of SD+SiNPs treatment.	108058	'Camk2d'	Shared rhythmic genes in ELGs among NC, SiNPs, SD+SiNPs treatments
74270	'Usp20'	Unique rhythmic genes in ELGs of NC treatment.	72650	2810006K23Rik	Unique rhythmic genes in ELGs of SiNPs treatment.	65116	Prrg2	Unique rhythmic genes in ELGs of SD+SiNPs treatment.	108079	'Prkaa2'	Shared rhythmic genes in ELGs among NC, SiNPs, SD+SiNPs treatments
74302	'Mtmr3'	Unique rhythmic genes in ELGs of NC treatment.	72656	Ints8	Unique rhythmic genes in ELGs of SiNPs treatment.	65945	Clstn1	Unique rhythmic genes in ELGs of SD+SiNPs treatment.	108124	'Napa'	Shared rhythmic genes in ELGs among NC, SiNPs, SD+SiNPs treatments
74478	'Snx29'	Unique rhythmic genes in ELGs of NC treatment.	72723	Zfp74	Unique rhythmic genes in ELGs of SiNPs treatment.	66058	Tmem176a	Unique rhythmic genes in ELGs of SD+SiNPs treatment.	108645	'Mat2b'	Shared rhythmic genes in ELGs among NC, SiNPs, SD+SiNPs treatments
74513	'Neto2'	Unique rhythmic genes in ELGs of NC treatment.	72772	Rint1	Unique rhythmic genes in ELGs of SiNPs treatment.	66084	Rmnd1	Unique rhythmic genes in ELGs of SD+SiNPs treatment.	108660	'Rnf187'	Shared rhythmic genes in ELGs among NC, SiNPs, SD+SiNPs treatments
74637	'Shpk'	Unique rhythmic genes in ELGs of NC treatment.	72821	Scn2b	Unique rhythmic genes in ELGs of SiNPs treatment.	66087	Emc3	Unique rhythmic genes in ELGs of SD+SiNPs treatment.	108682	'Gpt2'	Shared rhythmic genes in ELGs among NC, SiNPs, SD+SiNPs treatments
74775	'Lmbr1l'	Unique rhythmic genes in ELGs of NC treatment.	72900	Ndufv2	Unique rhythmic genes in ELGs of SiNPs treatment.	66131	Tipin	Unique rhythmic genes in ELGs of SD+SiNPs treatment.	108811	'Ccdc122'	Shared rhythmic genes in ELGs among NC, SiNPs, SD+SiNPs treatments
74996	'Usp47'	Unique rhythmic genes in ELGs of NC treatment.	72958	Zfp493	Unique rhythmic genes in ELGs of SiNPs treatment.	66154	Tmem14c	Unique rhythmic genes in ELGs of SD+SiNPs treatment.	108812	'Flacc1'	Shared rhythmic genes in ELGs among NC, SiNPs, SD+SiNPs treatments
74998	'Rab11fip2'	Unique rhythmic genes in ELGs of NC treatment.	73121	Rflna	Unique rhythmic genes in ELGs of SiNPs treatment.	66200	Commd6	Unique rhythmic genes in ELGs of SD+SiNPs treatment.	108903	'Tbcd'	Shared rhythmic genes in ELGs among NC, SiNPs, SD+SiNPs treatments
75033	'Mei4'	Unique rhythmic genes in ELGs of NC treatment.	73324	Clhc1	Unique rhythmic genes in ELGs of SiNPs treatment.	66211	Rpl3l	Unique rhythmic genes in ELGs of SD+SiNPs treatment.	108911	'Rcc2'	Shared rhythmic genes in ELGs among NC, SiNPs, SD+SiNPs treatments
75124	'Nxnl2'	Unique rhythmic genes in ELGs of NC treatment.	73373	Phospho2	Unique rhythmic genes in ELGs of SiNPs treatment.	66231	Thoc7	Unique rhythmic genes in ELGs of SD+SiNPs treatment.	108960	'Irak2'	Shared rhythmic genes in ELGs among NC, SiNPs, SD+SiNPs treatments
75317	'Parpbp'	Unique rhythmic genes in ELGs of NC treatment.	73430	Zfp974	Unique rhythmic genes in ELGs of SiNPs treatment.	66248	Alg5	Unique rhythmic genes in ELGs of SD+SiNPs treatment.	109136	'Mmaa'	Shared rhythmic genes in ELGs among NC, SiNPs, SD+SiNPs treatments
75415	'Arhgap12'	Unique rhythmic genes in ELGs of NC treatment.	73603	Trp53tg5	Unique rhythmic genes in ELGs of SiNPs treatment.	66256	Ssr2	Unique rhythmic genes in ELGs of SD+SiNPs treatment.	109254	'Adtrp'	Shared rhythmic genes in ELGs among NC, SiNPs, SD+SiNPs treatments
75475	'Oplah'	Unique rhythmic genes in ELGs of NC treatment.	73723	Sh3bgrl3	Unique rhythmic genes in ELGs of SiNPs treatment.	66257	Nicn1	Unique rhythmic genes in ELGs of SD+SiNPs treatment.	109552	'Sri'	Shared rhythmic genes in ELGs among NC, SiNPs, SD+SiNPs treatments
75541	'Nat8f4'	Unique rhythmic genes in ELGs of NC treatment.	73724	Mcee	Unique rhythmic genes in ELGs of SiNPs treatment.	66262	Ing5	Unique rhythmic genes in ELGs of SD+SiNPs treatment.	110454	'Ly6a'	Shared rhythmic genes in ELGs among NC, SiNPs, SD+SiNPs treatments
75547	'Akap13'	Unique rhythmic genes in ELGs of NC treatment.	73942	Fam151b	Unique rhythmic genes in ELGs of SiNPs treatment.	66266	Eapp	Unique rhythmic genes in ELGs of SD+SiNPs treatment.	110532	'Adarb1'	Shared rhythmic genes in ELGs among NC, SiNPs, SD+SiNPs treatments
75612	'Gns'	Unique rhythmic genes in ELGs of NC treatment.	73991	Atl1	Unique rhythmic genes in ELGs of SiNPs treatment.	66279	Tmem218	Unique rhythmic genes in ELGs of SD+SiNPs treatment.	112405	'Egln1'	Shared rhythmic genes in ELGs among NC, SiNPs, SD+SiNPs treatments
75641	'1700029I15Rik'	Unique rhythmic genes in ELGs of NC treatment.	74081	Cep350	Unique rhythmic genes in ELGs of SiNPs treatment.	66286	Sec11c	Unique rhythmic genes in ELGs of SD+SiNPs treatment.	114615	'Elac1'	Shared rhythmic genes in ELGs among NC, SiNPs, SD+SiNPs treatments
75761	'Apol7a'	Unique rhythmic genes in ELGs of NC treatment.	74152	Stra6l	Unique rhythmic genes in ELGs of SiNPs treatment.	66291	Smim8	Unique rhythmic genes in ELGs of SD+SiNPs treatment.	114642	'Brdt'	Shared rhythmic genes in ELGs among NC, SiNPs, SD+SiNPs treatments
75777	'Ttc23l'	Unique rhythmic genes in ELGs of NC treatment.	74154	Unkl	Unique rhythmic genes in ELGs of SiNPs treatment.	66294	Fam3a	Unique rhythmic genes in ELGs of SD+SiNPs treatment.	114654	'Ly6g6d'	Shared rhythmic genes in ELGs among NC, SiNPs, SD+SiNPs treatments
75847	'Crppa'	Unique rhythmic genes in ELGs of NC treatment.	74198	Dtx2	Unique rhythmic genes in ELGs of SiNPs treatment.	66307	Isoc1	Unique rhythmic genes in ELGs of SD+SiNPs treatment.	114663	'Impa2'	Shared rhythmic genes in ELGs among NC, SiNPs, SD+SiNPs treatments
76055	'Oga'	Unique rhythmic genes in ELGs of NC treatment.	74319	Mettl23	Unique rhythmic genes in ELGs of SiNPs treatment.	66309	Tmem128	Unique rhythmic genes in ELGs of SD+SiNPs treatment.	116870	'Mta1'	Shared rhythmic genes in ELGs among NC, SiNPs, SD+SiNPs treatments
76137	'Mcur1'	Unique rhythmic genes in ELGs of NC treatment.	74335	Xrcc3	Unique rhythmic genes in ELGs of SiNPs treatment.	66314	Tpd52l2	Unique rhythmic genes in ELGs of SD+SiNPs treatment.	116871	'Mta3'	Shared rhythmic genes in ELGs among NC, SiNPs, SD+SiNPs treatments
76219	'Arxes1'	Unique rhythmic genes in ELGs of NC treatment.	74343	Crtc2	Unique rhythmic genes in ELGs of SiNPs treatment.	66317	Wdr61	Unique rhythmic genes in ELGs of SD+SiNPs treatment.	117147	'Acsm1'	Shared rhythmic genes in ELGs among NC, SiNPs, SD+SiNPs treatments
76302	'Pcnp'	Unique rhythmic genes in ELGs of NC treatment.	74407	Ttc25	Unique rhythmic genes in ELGs of SiNPs treatment.	66365	Ccdc90b	Unique rhythmic genes in ELGs of SD+SiNPs treatment.	117198	'Ivns1abp'	Shared rhythmic genes in ELGs among NC, SiNPs, SD+SiNPs treatments
76380	'Cep112'	Unique rhythmic genes in ELGs of NC treatment.	74477	4933427D14Rik	Unique rhythmic genes in ELGs of SiNPs treatment.	66373	Lsm5	Unique rhythmic genes in ELGs of SD+SiNPs treatment.	140481	'Man2a2'	Shared rhythmic genes in ELGs among NC, SiNPs, SD+SiNPs treatments
76416	'Znrd1as'	Unique rhythmic genes in ELGs of NC treatment.	74479	Snx11	Unique rhythmic genes in ELGs of SiNPs treatment.	66394	Nosip	Unique rhythmic genes in ELGs of SD+SiNPs treatment.	140483	'Hnmt'	Shared rhythmic genes in ELGs among NC, SiNPs, SD+SiNPs treatments
76467	'Msrb2'	Unique rhythmic genes in ELGs of NC treatment.	74482	Ifitm7	Unique rhythmic genes in ELGs of SiNPs treatment.	66410	Mterf3	Unique rhythmic genes in ELGs of SD+SiNPs treatment.	140559	'Igsf8'	Shared rhythmic genes in ELGs among NC, SiNPs, SD+SiNPs treatments
76501	'Commd9'	Unique rhythmic genes in ELGs of NC treatment.	74511	Lrrc17	Unique rhythmic genes in ELGs of SiNPs treatment.	66412	Arrdc4	Unique rhythmic genes in ELGs of SD+SiNPs treatment.	170738	'Kcnh7'	Shared rhythmic genes in ELGs among NC, SiNPs, SD+SiNPs treatments
76560	'Prss8'	Unique rhythmic genes in ELGs of NC treatment.	74528	Mgme1	Unique rhythmic genes in ELGs of SiNPs treatment.	66419	Mrpl11	Unique rhythmic genes in ELGs of SD+SiNPs treatment.	170765	'Ripply3'	Shared rhythmic genes in ELGs among NC, SiNPs, SD+SiNPs treatments
76804	'Kdm4c'	Unique rhythmic genes in ELGs of NC treatment.	74574	Lvrn	Unique rhythmic genes in ELGs of SiNPs treatment.	66420	Polr2e	Unique rhythmic genes in ELGs of SD+SiNPs treatment.	170833	'Hook2'	Shared rhythmic genes in ELGs among NC, SiNPs, SD+SiNPs treatments
76809	'Bri3bp'	Unique rhythmic genes in ELGs of NC treatment.	74646	Spsb1	Unique rhythmic genes in ELGs of SiNPs treatment.	66445	Cyc1	Unique rhythmic genes in ELGs of SD+SiNPs treatment.	171388	'Bnipl'	Shared rhythmic genes in ELGs among NC, SiNPs, SD+SiNPs treatments
76846	'Rps9'	Unique rhythmic genes in ELGs of NC treatment.	74670	Zfp943	Unique rhythmic genes in ELGs of SiNPs treatment.	66467	Gtf2h5	Unique rhythmic genes in ELGs of SD+SiNPs treatment.	192173	'Mcrip1'	Shared rhythmic genes in ELGs among NC, SiNPs, SD+SiNPs treatments
76954	'St5'	Unique rhythmic genes in ELGs of NC treatment.	74685	Lrrc74b	Unique rhythmic genes in ELGs of SiNPs treatment.	66482	Exoc2	Unique rhythmic genes in ELGs of SD+SiNPs treatment.	192197	'Bcas3'	Shared rhythmic genes in ELGs among NC, SiNPs, SD+SiNPs treatments
77034	'2510039O18Rik'	Unique rhythmic genes in ELGs of NC treatment.	74747	Ddit4	Unique rhythmic genes in ELGs of SiNPs treatment.	66505	Zmynd11	Unique rhythmic genes in ELGs of SD+SiNPs treatment.	192200	'Wfdc12'	Shared rhythmic genes in ELGs among NC, SiNPs, SD+SiNPs treatments
77044	'Arid2'	Unique rhythmic genes in ELGs of NC treatment.	75216	Cep128	Unique rhythmic genes in ELGs of SiNPs treatment.	66540	Fam107b	Unique rhythmic genes in ELGs of SD+SiNPs treatment.	192236	'Hps1'	Shared rhythmic genes in ELGs among NC, SiNPs, SD+SiNPs treatments
77048	'Cep83'	Unique rhythmic genes in ELGs of NC treatment.	75454	Phpt1	Unique rhythmic genes in ELGs of SiNPs treatment.	66541	Immp1l	Unique rhythmic genes in ELGs of SD+SiNPs treatment.	193740	'Hspa1a'	Shared rhythmic genes in ELGs among NC, SiNPs, SD+SiNPs treatments
77087	'Ankrd11'	Unique rhythmic genes in ELGs of NC treatment.	75565	Sgf29	Unique rhythmic genes in ELGs of SiNPs treatment.	66592	Stoml2	Unique rhythmic genes in ELGs of SD+SiNPs treatment.	194388	'Tet3'	Shared rhythmic genes in ELGs among NC, SiNPs, SD+SiNPs treatments
77128	'Crebrf'	Unique rhythmic genes in ELGs of NC treatment.	75625	Mageh1	Unique rhythmic genes in ELGs of SiNPs treatment.	66595	Aste1	Unique rhythmic genes in ELGs of SD+SiNPs treatment.	208618	'Etl4'	Shared rhythmic genes in ELGs among NC, SiNPs, SD+SiNPs treatments
77305	'Wdr82'	Unique rhythmic genes in ELGs of NC treatment.	75731	Idnk	Unique rhythmic genes in ELGs of SiNPs treatment.	66607	Ms4a4d	Unique rhythmic genes in ELGs of SD+SiNPs treatment.	208869	'Dock3'	Shared rhythmic genes in ELGs among NC, SiNPs, SD+SiNPs treatments
77462	'Tmem116'	Unique rhythmic genes in ELGs of NC treatment.	75758	9130401M01Rik	Unique rhythmic genes in ELGs of SiNPs treatment.	66622	Ubr7	Unique rhythmic genes in ELGs of SD+SiNPs treatment.	209086	'Samd9l'	Shared rhythmic genes in ELGs among NC, SiNPs, SD+SiNPs treatments
77578	'Bcl9'	Unique rhythmic genes in ELGs of NC treatment.	75764	Slx1b	Unique rhythmic genes in ELGs of SiNPs treatment.	66626	Cdip1	Unique rhythmic genes in ELGs of SD+SiNPs treatment.	209456	'Trp53bp2'	Shared rhythmic genes in ELGs among NC, SiNPs, SD+SiNPs treatments
77593	'Usp45'	Unique rhythmic genes in ELGs of NC treatment.	75869	Arl5b	Unique rhythmic genes in ELGs of SiNPs treatment.	66631	Mfsd14b	Unique rhythmic genes in ELGs of SD+SiNPs treatment.	209692	'Dhtkd1'	Shared rhythmic genes in ELGs among NC, SiNPs, SD+SiNPs treatments
77652	'Zfp955a'	Unique rhythmic genes in ELGs of NC treatment.	76022	Gon4l	Unique rhythmic genes in ELGs of SiNPs treatment.	66645	Pspc1	Unique rhythmic genes in ELGs of SD+SiNPs treatment.	210035	'Nemp1'	Shared rhythmic genes in ELGs among NC, SiNPs, SD+SiNPs treatments
77683	'Ehmt1'	Unique rhythmic genes in ELGs of NC treatment.	76306	Slc18b1	Unique rhythmic genes in ELGs of SiNPs treatment.	66664	Tmem41a	Unique rhythmic genes in ELGs of SD+SiNPs treatment.	210104	'Zfp658'	Shared rhythmic genes in ELGs among NC, SiNPs, SD+SiNPs treatments
77809	'Lrrc42'	Unique rhythmic genes in ELGs of NC treatment.	76338	Rab2b	Unique rhythmic genes in ELGs of SiNPs treatment.	66687	Tbc1d15	Unique rhythmic genes in ELGs of SD+SiNPs treatment.	210135	'Zfp180'	Shared rhythmic genes in ELGs among NC, SiNPs, SD+SiNPs treatments
77980	'Sbf1'	Unique rhythmic genes in ELGs of NC treatment.	76429	Lhpp	Unique rhythmic genes in ELGs of SiNPs treatment.	66756	Cfap97	Unique rhythmic genes in ELGs of SD+SiNPs treatment.	211006	'Sepsecs'	Shared rhythmic genes in ELGs among NC, SiNPs, SD+SiNPs treatments
78323	'Fam219b'	Unique rhythmic genes in ELGs of NC treatment.	76453	Prss23	Unique rhythmic genes in ELGs of SiNPs treatment.	66768	Pacrgl	Unique rhythmic genes in ELGs of SD+SiNPs treatment.	211389	'Suox'	Shared rhythmic genes in ELGs among NC, SiNPs, SD+SiNPs treatments
78339	'Ttyh3'	Unique rhythmic genes in ELGs of NC treatment.	76457	Ccdc134	Unique rhythmic genes in ELGs of SiNPs treatment.	66787	Gskip	Unique rhythmic genes in ELGs of SD+SiNPs treatment.	211586	'Tfdp2'	Shared rhythmic genes in ELGs among NC, SiNPs, SD+SiNPs treatments
78541	'Asb8'	Unique rhythmic genes in ELGs of NC treatment.	76485	Glt8d1	Unique rhythmic genes in ELGs of SiNPs treatment.	66822	Fbxo25	Unique rhythmic genes in ELGs of SD+SiNPs treatment.	212377	'Mms22l'	Shared rhythmic genes in ELGs among NC, SiNPs, SD+SiNPs treatments
78618	'Acap2'	Unique rhythmic genes in ELGs of NC treatment.	76500	Ip6k2	Unique rhythmic genes in ELGs of SiNPs treatment.	66840	Wdr45b	Unique rhythmic genes in ELGs of SD+SiNPs treatment.	212933	'Pm20d1'	Shared rhythmic genes in ELGs among NC, SiNPs, SD+SiNPs treatments
78787	'Usp54'	Unique rhythmic genes in ELGs of NC treatment.	76566	Rflnb	Unique rhythmic genes in ELGs of SiNPs treatment.	66841	Etfdh	Unique rhythmic genes in ELGs of SD+SiNPs treatment.	212943	'Tent5a'	Shared rhythmic genes in ELGs among NC, SiNPs, SD+SiNPs treatments
78808	'Stxbp5'	Unique rhythmic genes in ELGs of NC treatment.	76747	Dapl1	Unique rhythmic genes in ELGs of SiNPs treatment.	66847	Hint3	Unique rhythmic genes in ELGs of SD+SiNPs treatment.	213522	'Plekhg6'	Shared rhythmic genes in ELGs among NC, SiNPs, SD+SiNPs treatments
78829	'Tsc22d4'	Unique rhythmic genes in ELGs of NC treatment.	76779	Cluap1	Unique rhythmic genes in ELGs of SiNPs treatment.	66849	Ppp1r2	Unique rhythmic genes in ELGs of SD+SiNPs treatment.	214137	'Arhgap29'	Shared rhythmic genes in ELGs among NC, SiNPs, SD+SiNPs treatments
78894	'Aacs'	Unique rhythmic genes in ELGs of NC treatment.	76793	Snip1	Unique rhythmic genes in ELGs of SiNPs treatment.	66855	Tcf25	Unique rhythmic genes in ELGs of SD+SiNPs treatment.	214424	'Parp16'	Shared rhythmic genes in ELGs among NC, SiNPs, SD+SiNPs treatments
78914	'Nadsyn1'	Unique rhythmic genes in ELGs of NC treatment.	76932	Arfip2	Unique rhythmic genes in ELGs of SiNPs treatment.	66863	Lztr1	Unique rhythmic genes in ELGs of SD+SiNPs treatment.	214523	'Tmprss4'	Shared rhythmic genes in ELGs among NC, SiNPs, SD+SiNPs treatments
79264	'Krit1'	Unique rhythmic genes in ELGs of NC treatment.	76933	Ifi27l2a	Unique rhythmic genes in ELGs of SiNPs treatment.	66870	Serbp1	Unique rhythmic genes in ELGs of SD+SiNPs treatment.	214663	'Slc25a29'	Shared rhythmic genes in ELGs among NC, SiNPs, SD+SiNPs treatments
79566	'Sh3bp5l'	Unique rhythmic genes in ELGs of NC treatment.	77037	Mrap	Unique rhythmic genes in ELGs of SiNPs treatment.	66873	Tril	Unique rhythmic genes in ELGs of SD+SiNPs treatment.	215113	'Slc43a2'	Shared rhythmic genes in ELGs among NC, SiNPs, SD+SiNPs treatments
80889	'Tlnrd1'	Unique rhythmic genes in ELGs of NC treatment.	77065	Ints7	Unique rhythmic genes in ELGs of SiNPs treatment.	66881	Pcyox1	Unique rhythmic genes in ELGs of SD+SiNPs treatment.	216134	'Pdxk'	Shared rhythmic genes in ELGs among NC, SiNPs, SD+SiNPs treatments
80898	'Erap1'	Unique rhythmic genes in ELGs of NC treatment.	77286	Nkrf	Unique rhythmic genes in ELGs of SiNPs treatment.	66929	Asf1b	Unique rhythmic genes in ELGs of SD+SiNPs treatment.	216505	'Pik3ip1'	Shared rhythmic genes in ELGs among NC, SiNPs, SD+SiNPs treatments
80902	'Zfp202'	Unique rhythmic genes in ELGs of NC treatment.	77411	Esrp2	Unique rhythmic genes in ELGs of SiNPs treatment.	66935	Cir1	Unique rhythmic genes in ELGs of SD+SiNPs treatment.	217069	'Trim25'	Shared rhythmic genes in ELGs among NC, SiNPs, SD+SiNPs treatments
80911	'Acox3'	Unique rhythmic genes in ELGs of NC treatment.	77945	Rpgrip1	Unique rhythmic genes in ELGs of SiNPs treatment.	66943	Pqlc1	Unique rhythmic genes in ELGs of SD+SiNPs treatment.	217082	'Hlf'	Shared rhythmic genes in ELGs among NC, SiNPs, SD+SiNPs treatments
81000	'Rad54l2'	Unique rhythmic genes in ELGs of NC treatment.	78373	Nudt17	Unique rhythmic genes in ELGs of SiNPs treatment.	66945	Sdha	Unique rhythmic genes in ELGs of SD+SiNPs treatment.	217109	'Utp18'	Shared rhythmic genes in ELGs among NC, SiNPs, SD+SiNPs treatments
81500	'Sil1'	Unique rhythmic genes in ELGs of NC treatment.	78593	Nrip3	Unique rhythmic genes in ELGs of SiNPs treatment.	66971	Cdk5rap1	Unique rhythmic genes in ELGs of SD+SiNPs treatment.	217149	'Cisd3'	Shared rhythmic genes in ELGs among NC, SiNPs, SD+SiNPs treatments
81535	'Sgpp1'	Unique rhythmic genes in ELGs of NC treatment.	78619	Zfp449	Unique rhythmic genes in ELGs of SiNPs treatment.	66985	Rassf7	Unique rhythmic genes in ELGs of SD+SiNPs treatment.	217166	'Nr1d1'	Shared rhythmic genes in ELGs among NC, SiNPs, SD+SiNPs treatments
81898	'Sf3b1'	Unique rhythmic genes in ELGs of NC treatment.	78658	Ncapd3	Unique rhythmic genes in ELGs of SiNPs treatment.	66988	Lap3	Unique rhythmic genes in ELGs of SD+SiNPs treatment.	217217	'Asb16'	Shared rhythmic genes in ELGs among NC, SiNPs, SD+SiNPs treatments
83797	'Smarcd1'	Unique rhythmic genes in ELGs of NC treatment.	78672	9530057J20Rik	Unique rhythmic genes in ELGs of SiNPs treatment.	67006	Cisd2	Unique rhythmic genes in ELGs of SD+SiNPs treatment.	217378	'Dnajc27'	Shared rhythmic genes in ELGs among NC, SiNPs, SD+SiNPs treatments
83964	'Jam3'	Unique rhythmic genes in ELGs of NC treatment.	78733	Troap	Unique rhythmic genes in ELGs of SiNPs treatment.	67010	Rbm7	Unique rhythmic genes in ELGs of SD+SiNPs treatment.	217732	'Cipc'	Shared rhythmic genes in ELGs among NC, SiNPs, SD+SiNPs treatments
84653	'Hes7'	Unique rhythmic genes in ELGs of NC treatment.	78767	Efcab11	Unique rhythmic genes in ELGs of SiNPs treatment.	67037	Pmf1	Unique rhythmic genes in ELGs of SD+SiNPs treatment.	217737	'Ahsa1'	Shared rhythmic genes in ELGs among NC, SiNPs, SD+SiNPs treatments
89867	'Sec16b'	Unique rhythmic genes in ELGs of NC treatment.	78783	Brpf1	Unique rhythmic genes in ELGs of SiNPs treatment.	67041	Oxct1	Unique rhythmic genes in ELGs of SD+SiNPs treatment.	217830	'Dglucy'	Shared rhythmic genes in ELGs among NC, SiNPs, SD+SiNPs treatments
93679	'Trim8'	Unique rhythmic genes in ELGs of NC treatment.	79555	BC005537	Unique rhythmic genes in ELGs of SiNPs treatment.	67046	Tbc1d7	Unique rhythmic genes in ELGs of SD+SiNPs treatment.	218215	'Rnf144b'	Shared rhythmic genes in ELGs among NC, SiNPs, SD+SiNPs treatments
93686	'Rbfox2'	Unique rhythmic genes in ELGs of NC treatment.	80289	Lysmd3	Unique rhythmic genes in ELGs of SiNPs treatment.	67048	Vma21	Unique rhythmic genes in ELGs of SD+SiNPs treatment.	218294	'Cdc14b'	Shared rhythmic genes in ELGs among NC, SiNPs, SD+SiNPs treatments
93691	'Klf7'	Unique rhythmic genes in ELGs of NC treatment.	80294	Pofut2	Unique rhythmic genes in ELGs of SiNPs treatment.	67054	Paics	Unique rhythmic genes in ELGs of SD+SiNPs treatment.	218490	'Btf3'	Shared rhythmic genes in ELGs among NC, SiNPs, SD+SiNPs treatments
93696	'Chrac1'	Unique rhythmic genes in ELGs of NC treatment.	80385	Tusc2	Unique rhythmic genes in ELGs of SiNPs treatment.	67070	Lsm14a	Unique rhythmic genes in ELGs of SD+SiNPs treatment.	219105	'Zmym5'	Shared rhythmic genes in ELGs among NC, SiNPs, SD+SiNPs treatments
93708	'Pcdhgc5'	Unique rhythmic genes in ELGs of NC treatment.	80707	Wwox	Unique rhythmic genes in ELGs of SiNPs treatment.	67117	Dynlt3	Unique rhythmic genes in ELGs of SD+SiNPs treatment.	223254	'Farp1'	Shared rhythmic genes in ELGs among NC, SiNPs, SD+SiNPs treatments
93742	'Pard3'	Unique rhythmic genes in ELGs of NC treatment.	80708	Pacsin3	Unique rhythmic genes in ELGs of SiNPs treatment.	67144	Lrrc40	Unique rhythmic genes in ELGs of SD+SiNPs treatment.	223527	'Eny2'	Shared rhythmic genes in ELGs among NC, SiNPs, SD+SiNPs treatments
93837	'Dach2'	Unique rhythmic genes in ELGs of NC treatment.	80981	Arl4d	Unique rhythmic genes in ELGs of SiNPs treatment.	67148	Ramac	Unique rhythmic genes in ELGs of SD+SiNPs treatment.	223780	'Adm2'	Shared rhythmic genes in ELGs among NC, SiNPs, SD+SiNPs treatments
93843	'Pnck'	Unique rhythmic genes in ELGs of NC treatment.	80987	Nckipsd	Unique rhythmic genes in ELGs of SiNPs treatment.	67149	Nkain1	Unique rhythmic genes in ELGs of SD+SiNPs treatment.	223827	'Gxylt1'	Shared rhythmic genes in ELGs among NC, SiNPs, SD+SiNPs treatments
93961	'B3galt5'	Unique rhythmic genes in ELGs of NC treatment.	81004	Tbl1xr1	Unique rhythmic genes in ELGs of SiNPs treatment.	67153	Rnaseh2b	Unique rhythmic genes in ELGs of SD+SiNPs treatment.	224022	'Slc7a4'	Shared rhythmic genes in ELGs among NC, SiNPs, SD+SiNPs treatments
94185	'Tnfrsf21'	Unique rhythmic genes in ELGs of NC treatment.	81845	Gpank1	Unique rhythmic genes in ELGs of SiNPs treatment.	67224	Med29	Unique rhythmic genes in ELGs of SD+SiNPs treatment.	224090	'Tmem44'	Shared rhythmic genes in ELGs among NC, SiNPs, SD+SiNPs treatments
94212	'Pag1'	Unique rhythmic genes in ELGs of NC treatment.	81906	Cyp4x1	Unique rhythmic genes in ELGs of SiNPs treatment.	67226	Tmem19	Unique rhythmic genes in ELGs of SD+SiNPs treatment.	224132	'Slc49a4'	Shared rhythmic genes in ELGs among NC, SiNPs, SD+SiNPs treatments
94218	'Cnnm3'	Unique rhythmic genes in ELGs of NC treatment.	83486	Rbm5	Unique rhythmic genes in ELGs of SiNPs treatment.	67229	Prpf18	Unique rhythmic genes in ELGs of SD+SiNPs treatment.	224674	'Slc37a1'	Shared rhythmic genes in ELGs among NC, SiNPs, SD+SiNPs treatments
96935	'Susd4'	Unique rhythmic genes in ELGs of NC treatment.	83922	Cep41	Unique rhythmic genes in ELGs of SiNPs treatment.	67236	Cinp	Unique rhythmic genes in ELGs of SD+SiNPs treatment.	225651	'Mppe1'	Shared rhythmic genes in ELGs among NC, SiNPs, SD+SiNPs treatments
97122	'H4c14'	Unique rhythmic genes in ELGs of NC treatment.	84036	Kcnn1	Unique rhythmic genes in ELGs of SiNPs treatment.	67241	Smc6	Unique rhythmic genes in ELGs of SD+SiNPs treatment.	225745	'Haus1'	Shared rhythmic genes in ELGs among NC, SiNPs, SD+SiNPs treatments
97130	'C77080'	Unique rhythmic genes in ELGs of NC treatment.	84652	Fam126a	Unique rhythmic genes in ELGs of SiNPs treatment.	67245	Peli1	Unique rhythmic genes in ELGs of SD+SiNPs treatment.	225896	'Ubxn1'	Shared rhythmic genes in ELGs among NC, SiNPs, SD+SiNPs treatments
98365	'Slamf9'	Unique rhythmic genes in ELGs of NC treatment.	93677	Lmod2	Unique rhythmic genes in ELGs of SiNPs treatment.	67268	Myl12a	Unique rhythmic genes in ELGs of SD+SiNPs treatment.	226169	'Pprc1'	Shared rhythmic genes in ELGs among NC, SiNPs, SD+SiNPs treatments
98386	'Lbr'	Unique rhythmic genes in ELGs of NC treatment.	93685	Entpd7	Unique rhythmic genes in ELGs of SiNPs treatment.	67269	Agtpbp1	Unique rhythmic genes in ELGs of SD+SiNPs treatment.	226251	'Ablim1'	Shared rhythmic genes in ELGs among NC, SiNPs, SD+SiNPs treatments
99100	'Cep152'	Unique rhythmic genes in ELGs of NC treatment.	93842	Igsf9	Unique rhythmic genes in ELGs of SiNPs treatment.	67276	Eri1	Unique rhythmic genes in ELGs of SD+SiNPs treatment.	226641	'Atf6'	Shared rhythmic genes in ELGs among NC, SiNPs, SD+SiNPs treatments
99151	'Cercam'	Unique rhythmic genes in ELGs of NC treatment.	94094	Trim34a	Unique rhythmic genes in ELGs of SiNPs treatment.	67285	Cwc27	Unique rhythmic genes in ELGs of SD+SiNPs treatment.	226691	'Ifi207'	Shared rhythmic genes in ELGs among NC, SiNPs, SD+SiNPs treatments
99334	'Zscan29'	Unique rhythmic genes in ELGs of NC treatment.	94214	Spock2	Unique rhythmic genes in ELGs of SiNPs treatment.	67302	Zc3h13	Unique rhythmic genes in ELGs of SD+SiNPs treatment.	226695	'Ifi205'	Shared rhythmic genes in ELGs among NC, SiNPs, SD+SiNPs treatments
99382	'Abtb2'	Unique rhythmic genes in ELGs of NC treatment.	94227	Pi15	Unique rhythmic genes in ELGs of SiNPs treatment.	67306	Zc2hc1a	Unique rhythmic genes in ELGs of SD+SiNPs treatment.	226747	'Ahctf1'	Shared rhythmic genes in ELGs among NC, SiNPs, SD+SiNPs treatments
100169	'Phactr4'	Unique rhythmic genes in ELGs of NC treatment.	94245	Dtnbp1	Unique rhythmic genes in ELGs of SiNPs treatment.	67326	1700037H04Rik	Unique rhythmic genes in ELGs of SD+SiNPs treatment.	226778	'Mark1'	Shared rhythmic genes in ELGs among NC, SiNPs, SD+SiNPs treatments
100273	'Osbpl9'	Unique rhythmic genes in ELGs of NC treatment.	94281	Sfxn4	Unique rhythmic genes in ELGs of SiNPs treatment.	67370	Zfp606	Unique rhythmic genes in ELGs of SD+SiNPs treatment.	227102	'Ormdl1'	Shared rhythmic genes in ELGs among NC, SiNPs, SD+SiNPs treatments
100756	'Usp30'	Unique rhythmic genes in ELGs of NC treatment.	97484	Cog8	Unique rhythmic genes in ELGs of SiNPs treatment.	67383	Carnmt1	Unique rhythmic genes in ELGs of SD+SiNPs treatment.	227613	'Tubb4b'	Shared rhythmic genes in ELGs among NC, SiNPs, SD+SiNPs treatments
101100	'Ttll3'	Unique rhythmic genes in ELGs of NC treatment.	98170	Tmem132a	Unique rhythmic genes in ELGs of SiNPs treatment.	67384	Bag4	Unique rhythmic genes in ELGs of SD+SiNPs treatment.	227618	'Lrrc26'	Shared rhythmic genes in ELGs among NC, SiNPs, SD+SiNPs treatments
101148	'Bmt2'	Unique rhythmic genes in ELGs of NC treatment.	98363	Efhd1	Unique rhythmic genes in ELGs of SiNPs treatment.	67433	Ccdc127	Unique rhythmic genes in ELGs of SD+SiNPs treatment.	227622	'Paxx'	Shared rhythmic genes in ELGs among NC, SiNPs, SD+SiNPs treatments
101502	'Hsd3b7'	Unique rhythmic genes in ELGs of NC treatment.	98952	Fam102a	Unique rhythmic genes in ELGs of SiNPs treatment.	67445	C1qtnf4	Unique rhythmic genes in ELGs of SD+SiNPs treatment.	227624	'Rabl6'	Shared rhythmic genes in ELGs among NC, SiNPs, SD+SiNPs treatments
101568	'Vrk3'	Unique rhythmic genes in ELGs of NC treatment.	99045	Mrps26	Unique rhythmic genes in ELGs of SiNPs treatment.	67466	Pdcl	Unique rhythmic genes in ELGs of SD+SiNPs treatment.	228140	'Tnks1bp1'	Shared rhythmic genes in ELGs among NC, SiNPs, SD+SiNPs treatments
102103	'Mtus1'	Unique rhythmic genes in ELGs of NC treatment.	99543	Olfml3	Unique rhythmic genes in ELGs of SiNPs treatment.	67469	Abhd5	Unique rhythmic genes in ELGs of SD+SiNPs treatment.	228730	'Kiz'	Shared rhythmic genes in ELGs among NC, SiNPs, SD+SiNPs treatments
102162	'Taf5l'	Unique rhythmic genes in ELGs of NC treatment.	99730	Taf13	Unique rhythmic genes in ELGs of SiNPs treatment.	67472	Mtfr1	Unique rhythmic genes in ELGs of SD+SiNPs treatment.	228983	'Osbpl2'	Shared rhythmic genes in ELGs among NC, SiNPs, SD+SiNPs treatments
102182	'Prmt9'	Unique rhythmic genes in ELGs of NC treatment.	100702	Gbp6	Unique rhythmic genes in ELGs of SiNPs treatment.	67486	Polr3g	Unique rhythmic genes in ELGs of SD+SiNPs treatment.	229003	'Helz2'	Shared rhythmic genes in ELGs among NC, SiNPs, SD+SiNPs treatments
102278	'Cpne7'	Unique rhythmic genes in ELGs of NC treatment.	100705	Acacb	Unique rhythmic genes in ELGs of SiNPs treatment.	67492	Zfand4	Unique rhythmic genes in ELGs of SD+SiNPs treatment.	229011	'Samd10'	Shared rhythmic genes in ELGs among NC, SiNPs, SD+SiNPs treatments
102371	'Myzap'	Unique rhythmic genes in ELGs of NC treatment.	101401	Adamts9	Unique rhythmic genes in ELGs of SiNPs treatment.	67515	Ttc33	Unique rhythmic genes in ELGs of SD+SiNPs treatment.	229317	'Eif2a'	Shared rhythmic genes in ELGs among NC, SiNPs, SD+SiNPs treatments
102442	'Dennd4a'	Unique rhythmic genes in ELGs of NC treatment.	101685	Spty2d1	Unique rhythmic genes in ELGs of SiNPs treatment.	67526	Atg12	Unique rhythmic genes in ELGs of SD+SiNPs treatment.	229599	'Ciart'	Shared rhythmic genes in ELGs among NC, SiNPs, SD+SiNPs treatments
102626	'Mapkapk3'	Unique rhythmic genes in ELGs of NC treatment.	101867	Rrp8	Unique rhythmic genes in ELGs of SiNPs treatment.	67529	Fgfr1op2	Unique rhythmic genes in ELGs of SD+SiNPs treatment.	230073	'Ddx58'	Shared rhythmic genes in ELGs among NC, SiNPs, SD+SiNPs treatments
102693	'Phldb1'	Unique rhythmic genes in ELGs of NC treatment.	102093	Phkb	Unique rhythmic genes in ELGs of SiNPs treatment.	67542	Cog6	Unique rhythmic genes in ELGs of SD+SiNPs treatment.	230514	'Leprot'	Shared rhythmic genes in ELGs among NC, SiNPs, SD+SiNPs treatments
102920	'Cenpi'	Unique rhythmic genes in ELGs of NC treatment.	102423	Hinfp	Unique rhythmic genes in ELGs of SiNPs treatment.	67547	Slc39a8	Unique rhythmic genes in ELGs of SD+SiNPs treatment.	230753	'Thrap3'	Shared rhythmic genes in ELGs among NC, SiNPs, SD+SiNPs treatments
103140	'Gstt3'	Unique rhythmic genes in ELGs of NC treatment.	102680	Slc6a20a	Unique rhythmic genes in ELGs of SiNPs treatment.	67588	Rnf41	Unique rhythmic genes in ELGs of SD+SiNPs treatment.	230757	'5730409E04Rik'	Shared rhythmic genes in ELGs among NC, SiNPs, SD+SiNPs treatments
103213	'Traf3ip2'	Unique rhythmic genes in ELGs of NC treatment.	103733	Tubg1	Unique rhythmic genes in ELGs of SiNPs treatment.	67603	Dusp6	Unique rhythmic genes in ELGs of SD+SiNPs treatment.	230761	'Zfp362'	Shared rhythmic genes in ELGs among NC, SiNPs, SD+SiNPs treatments
103425	'Ncln'	Unique rhythmic genes in ELGs of NC treatment.	103978	Gpc5	Unique rhythmic genes in ELGs of SiNPs treatment.	67628	Anp32b	Unique rhythmic genes in ELGs of SD+SiNPs treatment.	230789	'Fam76a'	Shared rhythmic genes in ELGs among NC, SiNPs, SD+SiNPs treatments
103765	'Tmem17'	Unique rhythmic genes in ELGs of NC treatment.	104457	0610010K14Rik	Unique rhythmic genes in ELGs of SiNPs treatment.	67630	Samd8	Unique rhythmic genes in ELGs of SD+SiNPs treatment.	230848	'Zbtb40'	Shared rhythmic genes in ELGs among NC, SiNPs, SD+SiNPs treatments
103768	'Tubg2'	Unique rhythmic genes in ELGs of NC treatment.	105351	AW209491	Unique rhythmic genes in ELGs of SiNPs treatment.	67636	Etfrf1	Unique rhythmic genes in ELGs of SD+SiNPs treatment.	230895	'Vps13d'	Shared rhythmic genes in ELGs among NC, SiNPs, SD+SiNPs treatments
104086	'Cyp27a1'	Unique rhythmic genes in ELGs of NC treatment.	105446	Gmpr2	Unique rhythmic genes in ELGs of SiNPs treatment.	67675	Cuta	Unique rhythmic genes in ELGs of SD+SiNPs treatment.	230991	'Fndc10'	Shared rhythmic genes in ELGs among NC, SiNPs, SD+SiNPs treatments
104215	'Rhoq'	Unique rhythmic genes in ELGs of NC treatment.	105841	Dennd3	Unique rhythmic genes in ELGs of SiNPs treatment.	67712	Slc25a37	Unique rhythmic genes in ELGs of SD+SiNPs treatment.	231093	'Agbl5'	Shared rhythmic genes in ELGs among NC, SiNPs, SD+SiNPs treatments
104348	'Zfp120'	Unique rhythmic genes in ELGs of NC treatment.	106672	AI413582	Unique rhythmic genes in ELGs of SiNPs treatment.	67758	Aadac	Unique rhythmic genes in ELGs of SD+SiNPs treatment.	231532	'Arhgap24'	Shared rhythmic genes in ELGs among NC, SiNPs, SD+SiNPs treatments
104582	'Rprml'	Unique rhythmic genes in ELGs of NC treatment.	106757	Catsperd	Unique rhythmic genes in ELGs of SiNPs treatment.	67763	Prpsap1	Unique rhythmic genes in ELGs of SD+SiNPs treatment.	231807	'Map11'	Shared rhythmic genes in ELGs among NC, SiNPs, SD+SiNPs treatments
104601	'Mycbpap'	Unique rhythmic genes in ELGs of NC treatment.	107029	Me2	Unique rhythmic genes in ELGs of SiNPs treatment.	67778	Zfp639	Unique rhythmic genes in ELGs of SD+SiNPs treatment.	231872	'Aimp2'	Shared rhythmic genes in ELGs among NC, SiNPs, SD+SiNPs treatments
105440	'Kctd9'	Unique rhythmic genes in ELGs of NC treatment.	107094	Rrp12	Unique rhythmic genes in ELGs of SiNPs treatment.	67785	Zmym4	Unique rhythmic genes in ELGs of SD+SiNPs treatment.	231874	'Ccz1'	Shared rhythmic genes in ELGs among NC, SiNPs, SD+SiNPs treatments
105445	'Dock9'	Unique rhythmic genes in ELGs of NC treatment.	107182	Btaf1	Unique rhythmic genes in ELGs of SiNPs treatment.	67811	Poldip2	Unique rhythmic genes in ELGs of SD+SiNPs treatment.	231946	'Fam221a'	Shared rhythmic genes in ELGs among NC, SiNPs, SD+SiNPs treatments
105501	'Abhd4'	Unique rhythmic genes in ELGs of NC treatment.	107197	Uqcc3	Unique rhythmic genes in ELGs of SiNPs treatment.	67830	Rer1	Unique rhythmic genes in ELGs of SD+SiNPs treatment.	232078	'Thnsl2'	Shared rhythmic genes in ELGs among NC, SiNPs, SD+SiNPs treatments
105663	'Thtpa'	Unique rhythmic genes in ELGs of NC treatment.	107338	Gbf1	Unique rhythmic genes in ELGs of SiNPs treatment.	67841	Atg3	Unique rhythmic genes in ELGs of SD+SiNPs treatment.	232087	'Mat2a'	Shared rhythmic genes in ELGs among NC, SiNPs, SD+SiNPs treatments
105689	'Mycbp2'	Unique rhythmic genes in ELGs of NC treatment.	107392	Brms1	Unique rhythmic genes in ELGs of SiNPs treatment.	67842	Nop9	Unique rhythmic genes in ELGs of SD+SiNPs treatment.	232223	'Txnrd3'	Shared rhythmic genes in ELGs among NC, SiNPs, SD+SiNPs treatments
105835	'Sgsm3'	Unique rhythmic genes in ELGs of NC treatment.	107995	Cdc20	Unique rhythmic genes in ELGs of SiNPs treatment.	67872	Nsmce4a	Unique rhythmic genes in ELGs of SD+SiNPs treatment.	232232	'Hdac11'	Shared rhythmic genes in ELGs among NC, SiNPs, SD+SiNPs treatments
106039	'Gga1'	Unique rhythmic genes in ELGs of NC treatment.	108155	Ogt	Unique rhythmic genes in ELGs of SiNPs treatment.	67898	Pef1	Unique rhythmic genes in ELGs of SD+SiNPs treatment.	232560	'Caprin2'	Shared rhythmic genes in ELGs among NC, SiNPs, SD+SiNPs treatments
106326	'Osbpl11'	Unique rhythmic genes in ELGs of NC treatment.	108907	Nusap1	Unique rhythmic genes in ELGs of SiNPs treatment.	67979	Atad1	Unique rhythmic genes in ELGs of SD+SiNPs treatment.	233733	'Galnt18'	Shared rhythmic genes in ELGs among NC, SiNPs, SD+SiNPs treatments
106504	'Stk38'	Unique rhythmic genes in ELGs of NC treatment.	108912	Cdca2	Unique rhythmic genes in ELGs of SiNPs treatment.	68035	Rbm42	Unique rhythmic genes in ELGs of SD+SiNPs treatment.	233908	'Fus'	Shared rhythmic genes in ELGs among NC, SiNPs, SD+SiNPs treatments
106639	'Vmac'	Unique rhythmic genes in ELGs of NC treatment.	109108	Slc30a9	Unique rhythmic genes in ELGs of SiNPs treatment.	68036	Zfp706	Unique rhythmic genes in ELGs of SD+SiNPs treatment.	234374	'Ddx49'	Shared rhythmic genes in ELGs among NC, SiNPs, SD+SiNPs treatments
107071	'Wdr74'	Unique rhythmic genes in ELGs of NC treatment.	109154	Mlec	Unique rhythmic genes in ELGs of SiNPs treatment.	68044	Chac2	Unique rhythmic genes in ELGs of SD+SiNPs treatment.	234407	'Colgalt1'	Shared rhythmic genes in ELGs among NC, SiNPs, SD+SiNPs treatments
107260	'Otub1'	Unique rhythmic genes in ELGs of NC treatment.	109212	Pimreg	Unique rhythmic genes in ELGs of SiNPs treatment.	68045	Rtraf	Unique rhythmic genes in ELGs of SD+SiNPs treatment.	234684	'Lrrc29'	Shared rhythmic genes in ELGs among NC, SiNPs, SD+SiNPs treatments
107607	'Nod1'	Unique rhythmic genes in ELGs of NC treatment.	109229	Fam118b	Unique rhythmic genes in ELGs of SiNPs treatment.	68048	Aen	Unique rhythmic genes in ELGs of SD+SiNPs treatment.	234725	'Zfp612'	Shared rhythmic genes in ELGs among NC, SiNPs, SD+SiNPs treatments
107723	'Slc12a6'	Unique rhythmic genes in ELGs of NC treatment.	109267	Ssc4d	Unique rhythmic genes in ELGs of SiNPs treatment.	68051	Nutf2	Unique rhythmic genes in ELGs of SD+SiNPs treatment.	234734	'Aars'	Shared rhythmic genes in ELGs among NC, SiNPs, SD+SiNPs treatments
107885	'Mthfs'	Unique rhythmic genes in ELGs of NC treatment.	109299	Tmem250-ps	Unique rhythmic genes in ELGs of SiNPs treatment.	68073	Atpsckmt	Unique rhythmic genes in ELGs of SD+SiNPs treatment.	235130	'Adamts15'	Shared rhythmic genes in ELGs among NC, SiNPs, SD+SiNPs treatments
108052	'Slc14a1'	Unique rhythmic genes in ELGs of NC treatment.	109331	Rnf20	Unique rhythmic genes in ELGs of SiNPs treatment.	68082	Dusp19	Unique rhythmic genes in ELGs of SD+SiNPs treatment.	235459	'Gtf2a2'	Shared rhythmic genes in ELGs among NC, SiNPs, SD+SiNPs treatments
108099	'Prkag2'	Unique rhythmic genes in ELGs of NC treatment.	109658	Txlna	Unique rhythmic genes in ELGs of SiNPs treatment.	68112	Entr1	Unique rhythmic genes in ELGs of SD+SiNPs treatment.	235497	'Leo1'	Shared rhythmic genes in ELGs among NC, SiNPs, SD+SiNPs treatments
108138	'Xrcc4'	Unique rhythmic genes in ELGs of NC treatment.	109700	Itga1	Unique rhythmic genes in ELGs of SiNPs treatment.	68117	Apool	Unique rhythmic genes in ELGs of SD+SiNPs treatment.	235584	'Dusp7'	Shared rhythmic genes in ELGs among NC, SiNPs, SD+SiNPs treatments
108829	'Jmjd1c'	Unique rhythmic genes in ELGs of NC treatment.	109801	Glo1	Unique rhythmic genes in ELGs of SiNPs treatment.	68133	Gcsh	Unique rhythmic genes in ELGs of SD+SiNPs treatment.	236539	'Phgdh'	Shared rhythmic genes in ELGs among NC, SiNPs, SD+SiNPs treatments
108857	'Ankhd1'	Unique rhythmic genes in ELGs of NC treatment.	109978	Art4	Unique rhythmic genes in ELGs of SiNPs treatment.	68166	Spire1	Unique rhythmic genes in ELGs of SD+SiNPs treatment.	237926	'Rsad1'	Shared rhythmic genes in ELGs among NC, SiNPs, SD+SiNPs treatments
109042	'Cavin3'	Unique rhythmic genes in ELGs of NC treatment.	110006	Gusb	Unique rhythmic genes in ELGs of SiNPs treatment.	68178	Cgnl1	Unique rhythmic genes in ELGs of SD+SiNPs treatment.	239570	'Ttc38'	Shared rhythmic genes in ELGs among NC, SiNPs, SD+SiNPs treatments
109135	'Plekha5'	Unique rhythmic genes in ELGs of NC treatment.	110033	Kif22	Unique rhythmic genes in ELGs of SiNPs treatment.	68187	Fam135a	Unique rhythmic genes in ELGs of SD+SiNPs treatment.	240752	'Pik3c2b'	Shared rhythmic genes in ELGs among NC, SiNPs, SD+SiNPs treatments
109284	'R3hdm4'	Unique rhythmic genes in ELGs of NC treatment.	110920	Hspa13	Unique rhythmic genes in ELGs of SiNPs treatment.	68201	Ccdc34	Unique rhythmic genes in ELGs of SD+SiNPs treatment.	240832	'Tor1aip2'	Shared rhythmic genes in ELGs among NC, SiNPs, SD+SiNPs treatments
109305	'Orai1'	Unique rhythmic genes in ELGs of NC treatment.	110962	Mbd6	Unique rhythmic genes in ELGs of SiNPs treatment.	68226	Efcab2	Unique rhythmic genes in ELGs of SD+SiNPs treatment.	241274	'Pnpla7'	Shared rhythmic genes in ELGs among NC, SiNPs, SD+SiNPs treatments
109346	'Ankrd39'	Unique rhythmic genes in ELGs of NC treatment.	112407	Egln3	Unique rhythmic genes in ELGs of SiNPs treatment.	68240	Rpa3	Unique rhythmic genes in ELGs of SD+SiNPs treatment.	242126	'Slc22a15'	Shared rhythmic genes in ELGs among NC, SiNPs, SD+SiNPs treatments
109624	'Cald1'	Unique rhythmic genes in ELGs of NC treatment.	112415	Zfp607b	Unique rhythmic genes in ELGs of SiNPs treatment.	68272	Rbm28	Unique rhythmic genes in ELGs of SD+SiNPs treatment.	242747	'Zfp933'	Shared rhythmic genes in ELGs among NC, SiNPs, SD+SiNPs treatments
109778	'Blvra'	Unique rhythmic genes in ELGs of NC treatment.	114332	Lyve1	Unique rhythmic genes in ELGs of SiNPs treatment.	68292	Stt3b	Unique rhythmic genes in ELGs of SD+SiNPs treatment.	243659	'Styk1'	Shared rhythmic genes in ELGs among NC, SiNPs, SD+SiNPs treatments
109934	'Abr'	Unique rhythmic genes in ELGs of NC treatment.	116847	Prelp	Unique rhythmic genes in ELGs of SiNPs treatment.	68365	Rab14	Unique rhythmic genes in ELGs of SD+SiNPs treatment.	243771	'Parp12'	Shared rhythmic genes in ELGs among NC, SiNPs, SD+SiNPs treatments
110094	'Phka2'	Unique rhythmic genes in ELGs of NC treatment.	117149	Tirap	Unique rhythmic genes in ELGs of SiNPs treatment.	68465	Adipor2	Unique rhythmic genes in ELGs of SD+SiNPs treatment.	243780	'E330009J07Rik'	Shared rhythmic genes in ELGs among NC, SiNPs, SD+SiNPs treatments
110173	'Manba'	Unique rhythmic genes in ELGs of NC treatment.	140492	Kcnn2	Unique rhythmic genes in ELGs of SiNPs treatment.	68493	Ndufaf4	Unique rhythmic genes in ELGs of SD+SiNPs treatment.	244059	'Chd2'	Shared rhythmic genes in ELGs among NC, SiNPs, SD+SiNPs treatments
110616	'Atxn3'	Unique rhythmic genes in ELGs of NC treatment.	170439	Elovl6	Unique rhythmic genes in ELGs of SiNPs treatment.	68526	Gpr155	Unique rhythmic genes in ELGs of SD+SiNPs treatment.	244421	'Lonrf1'	Shared rhythmic genes in ELGs among NC, SiNPs, SD+SiNPs treatments
110784	'Nr3c2'	Unique rhythmic genes in ELGs of NC treatment.	170748	Smco4	Unique rhythmic genes in ELGs of SiNPs treatment.	68539	Tmem109	Unique rhythmic genes in ELGs of SD+SiNPs treatment.	244579	'Tox3'	Shared rhythmic genes in ELGs among NC, SiNPs, SD+SiNPs treatments
110954	'Rpl10'	Unique rhythmic genes in ELGs of NC treatment.	170757	Adgrl4	Unique rhythmic genes in ELGs of SiNPs treatment.	68544	Trir	Unique rhythmic genes in ELGs of SD+SiNPs treatment.	244654	'Mtss2'	Shared rhythmic genes in ELGs among NC, SiNPs, SD+SiNPs treatments
112418	'1700102P08Rik'	Unique rhythmic genes in ELGs of NC treatment.	170758	Rac3	Unique rhythmic genes in ELGs of SiNPs treatment.	68549	Sgo2a	Unique rhythmic genes in ELGs of SD+SiNPs treatment.	245404	'Dcaf12l1'	Shared rhythmic genes in ELGs among NC, SiNPs, SD+SiNPs treatments
113868	'Acaa1a'	Unique rhythmic genes in ELGs of NC treatment.	170767	Rfxap	Unique rhythmic genes in ELGs of SiNPs treatment.	68646	Nadk2	Unique rhythmic genes in ELGs of SD+SiNPs treatment.	245847	'Amdhd2'	Shared rhythmic genes in ELGs among NC, SiNPs, SD+SiNPs treatments
114142	'Foxp2'	Unique rhythmic genes in ELGs of NC treatment.	170770	Bbc3	Unique rhythmic genes in ELGs of SiNPs treatment.	68693	Hnrnpul2	Unique rhythmic genes in ELGs of SD+SiNPs treatment.	245867	'Pcmtd2'	Shared rhythmic genes in ELGs among NC, SiNPs, SD+SiNPs treatments
114304	'Slc28a3'	Unique rhythmic genes in ELGs of NC treatment.	170776	Cd209c	Unique rhythmic genes in ELGs of SiNPs treatment.	68713	Ifitm1	Unique rhythmic genes in ELGs of SD+SiNPs treatment.	246196	'Zfp277'	Shared rhythmic genes in ELGs among NC, SiNPs, SD+SiNPs treatments
114674	'Gtf2ird2'	Unique rhythmic genes in ELGs of NC treatment.	170779	Cd209d	Unique rhythmic genes in ELGs of SiNPs treatment.	68718	Rnf166	Unique rhythmic genes in ELGs of SD+SiNPs treatment.	258364	'Olfr976'	Shared rhythmic genes in ELGs among NC, SiNPs, SD+SiNPs treatments
116848	'Baz2a'	Unique rhythmic genes in ELGs of NC treatment.	170791	Rbm39	Unique rhythmic genes in ELGs of SiNPs treatment.	68795	Ubr3	Unique rhythmic genes in ELGs of SD+SiNPs treatment.	260299	'Cadm4'	Shared rhythmic genes in ELGs among NC, SiNPs, SD+SiNPs treatments
117589	'Asb7'	Unique rhythmic genes in ELGs of NC treatment.	171212	Galnt10	Unique rhythmic genes in ELGs of SiNPs treatment.	68818	Zfand2b	Unique rhythmic genes in ELGs of SD+SiNPs treatment.	260315	'Nav3'	Shared rhythmic genes in ELGs among NC, SiNPs, SD+SiNPs treatments
118445	'Klf16'	Unique rhythmic genes in ELGs of NC treatment.	192156	Mvd	Unique rhythmic genes in ELGs of SiNPs treatment.	68833	Pdcl3	Unique rhythmic genes in ELGs of SD+SiNPs treatment.	264064	'Cdk8'	Shared rhythmic genes in ELGs among NC, SiNPs, SD+SiNPs treatments
140580	'Elmo1'	Unique rhythmic genes in ELGs of NC treatment.	192285	Phf21a	Unique rhythmic genes in ELGs of SiNPs treatment.	68846	Rnf208	Unique rhythmic genes in ELGs of SD+SiNPs treatment.	268390	'Ahsa2'	Shared rhythmic genes in ELGs among NC, SiNPs, SD+SiNPs treatments
140630	'Ube4a'	Unique rhythmic genes in ELGs of NC treatment.	192986	Cyb5d2	Unique rhythmic genes in ELGs of SiNPs treatment.	68861	Dipk2a	Unique rhythmic genes in ELGs of SD+SiNPs treatment.	268395	'Mpg'	Shared rhythmic genes in ELGs among NC, SiNPs, SD+SiNPs treatments
170716	'Cyp4f13'	Unique rhythmic genes in ELGs of NC treatment.	193736	Zbtb12	Unique rhythmic genes in ELGs of SiNPs treatment.	68879	Prpf6	Unique rhythmic genes in ELGs of SD+SiNPs treatment.	268417	'Zkscan17'	Shared rhythmic genes in ELGs among NC, SiNPs, SD+SiNPs treatments
170722	'Nxf7'	Unique rhythmic genes in ELGs of NC treatment.	194126	Mtmr11	Unique rhythmic genes in ELGs of SiNPs treatment.	68910	Zfp467	Unique rhythmic genes in ELGs of SD+SiNPs treatment.	268822	'Adck5'	Shared rhythmic genes in ELGs among NC, SiNPs, SD+SiNPs treatments
170755	'Sgk3'	Unique rhythmic genes in ELGs of NC treatment.	195040	Tmem199	Unique rhythmic genes in ELGs of SiNPs treatment.	68944	Tmco1	Unique rhythmic genes in ELGs of SD+SiNPs treatment.	268878	'Atp13a5'	Shared rhythmic genes in ELGs among NC, SiNPs, SD+SiNPs treatments
170756	'Slc8b1'	Unique rhythmic genes in ELGs of NC treatment.	207352	Sec23ip	Unique rhythmic genes in ELGs of SiNPs treatment.	68969	Eif1b	Unique rhythmic genes in ELGs of SD+SiNPs treatment.	269529	'Fbxo10'	Shared rhythmic genes in ELGs among NC, SiNPs, SD+SiNPs treatments
170789	'Acot8'	Unique rhythmic genes in ELGs of NC treatment.	207375	Fam120c	Unique rhythmic genes in ELGs of SiNPs treatment.	68991	Ssu72	Unique rhythmic genes in ELGs of SD+SiNPs treatment.	269604	'Gpr157'	Shared rhythmic genes in ELGs among NC, SiNPs, SD+SiNPs treatments
171095	'Il17rc'	Unique rhythmic genes in ELGs of NC treatment.	207777	Tspoap1	Unique rhythmic genes in ELGs of SiNPs treatment.	69046	Isca1	Unique rhythmic genes in ELGs of SD+SiNPs treatment.	269831	'Tspan12'	Shared rhythmic genes in ELGs among NC, SiNPs, SD+SiNPs treatments
171170	'Mbnl3'	Unique rhythmic genes in ELGs of NC treatment.	207952	Klhl25	Unique rhythmic genes in ELGs of SiNPs treatment.	69051	Pycr2	Unique rhythmic genes in ELGs of SD+SiNPs treatment.	269954	'Ttll13'	Shared rhythmic genes in ELGs among NC, SiNPs, SD+SiNPs treatments
192166	'Sardh'	Unique rhythmic genes in ELGs of NC treatment.	208111	Zfp976	Unique rhythmic genes in ELGs of SiNPs treatment.	69072	Ebna1bp2	Unique rhythmic genes in ELGs of SD+SiNPs treatment.	270672	'Map3k15'	Shared rhythmic genes in ELGs among NC, SiNPs, SD+SiNPs treatments
192652	'Wdr81'	Unique rhythmic genes in ELGs of NC treatment.	208595	Mterf1b	Unique rhythmic genes in ELGs of SiNPs treatment.	69076	Triap1	Unique rhythmic genes in ELGs of SD+SiNPs treatment.	270685	'Mthfd1l'	Shared rhythmic genes in ELGs among NC, SiNPs, SD+SiNPs treatments
192662	'Arhgdia'	Unique rhythmic genes in ELGs of NC treatment.	208606	Rsrc2	Unique rhythmic genes in ELGs of SiNPs treatment.	69131	Cdk12	Unique rhythmic genes in ELGs of SD+SiNPs treatment.	272396	'Tarsl2'	Shared rhythmic genes in ELGs among NC, SiNPs, SD+SiNPs treatments
192897	'Itgb4'	Unique rhythmic genes in ELGs of NC treatment.	209011	Sirt7	Unique rhythmic genes in ELGs of SiNPs treatment.	69161	Manbal	Unique rhythmic genes in ELGs of SD+SiNPs treatment.	277973	'Slc9a5'	Shared rhythmic genes in ELGs among NC, SiNPs, SD+SiNPs treatments
193385	'Ripor2'	Unique rhythmic genes in ELGs of NC treatment.	209334	Gen1	Unique rhythmic genes in ELGs of SiNPs treatment.	69190	Dym	Unique rhythmic genes in ELGs of SD+SiNPs treatment.	279766	'Rhbdd3'	Shared rhythmic genes in ELGs among NC, SiNPs, SD+SiNPs treatments
193796	'Kdm4b'	Unique rhythmic genes in ELGs of NC treatment.	210004	B3gntl1	Unique rhythmic genes in ELGs of SiNPs treatment.	69241	Polr2d	Unique rhythmic genes in ELGs of SD+SiNPs treatment.	319165	'H2ac7'	Shared rhythmic genes in ELGs among NC, SiNPs, SD+SiNPs treatments
194655	'Klf11'	Unique rhythmic genes in ELGs of NC treatment.	210009	Mtrr	Unique rhythmic genes in ELGs of SiNPs treatment.	69257	Elf2	Unique rhythmic genes in ELGs of SD+SiNPs treatment.	319190	'H2bc21'	Shared rhythmic genes in ELGs among NC, SiNPs, SD+SiNPs treatments
195018	'Zzef1'	Unique rhythmic genes in ELGs of NC treatment.	210530	P3h2	Unique rhythmic genes in ELGs of SiNPs treatment.	69274	Ctdspl	Unique rhythmic genes in ELGs of SD+SiNPs treatment.	319370	'Ubald2'	Shared rhythmic genes in ELGs among NC, SiNPs, SD+SiNPs treatments
207181	'Rbms3'	Unique rhythmic genes in ELGs of NC treatment.	210719	Mkx	Unique rhythmic genes in ELGs of SiNPs treatment.	69309	Slc16a13	Unique rhythmic genes in ELGs of SD+SiNPs treatment.	319478	'Cxxc4'	Shared rhythmic genes in ELGs among NC, SiNPs, SD+SiNPs treatments
207182	'Ggt7'	Unique rhythmic genes in ELGs of NC treatment.	211151	Churc1	Unique rhythmic genes in ELGs of SiNPs treatment.	69310	Pacrg	Unique rhythmic genes in ELGs of SD+SiNPs treatment.	319582	'Trmt9b'	Shared rhythmic genes in ELGs among NC, SiNPs, SD+SiNPs treatments
207565	'Camkk2'	Unique rhythmic genes in ELGs of NC treatment.	211948	Pde12	Unique rhythmic genes in ELGs of SiNPs treatment.	69379	C8g	Unique rhythmic genes in ELGs of SD+SiNPs treatment.	319997	'A630001G21Rik'	Shared rhythmic genes in ELGs among NC, SiNPs, SD+SiNPs treatments
207615	'Wdr37'	Unique rhythmic genes in ELGs of NC treatment.	212090	Tmem60	Unique rhythmic genes in ELGs of SiNPs treatment.	69537	Dnase1l1	Unique rhythmic genes in ELGs of SD+SiNPs treatment.	320204	'Etfbkmt'	Shared rhythmic genes in ELGs among NC, SiNPs, SD+SiNPs treatments
207704	'Gtpbp10'	Unique rhythmic genes in ELGs of NC treatment.	212898	Dse	Unique rhythmic genes in ELGs of SiNPs treatment.	69556	Bod1	Unique rhythmic genes in ELGs of SD+SiNPs treatment.	320299	'Iqcb1'	Shared rhythmic genes in ELGs among NC, SiNPs, SD+SiNPs treatments
207742	'Rnf43'	Unique rhythmic genes in ELGs of NC treatment.	213350	Gatd1	Unique rhythmic genes in ELGs of SiNPs treatment.	69612	Kansl2	Unique rhythmic genes in ELGs of SD+SiNPs treatment.	320655	'Pgap3'	Shared rhythmic genes in ELGs among NC, SiNPs, SD+SiNPs treatments
207798	'Gramd1c'	Unique rhythmic genes in ELGs of NC treatment.	213452	Dstyk	Unique rhythmic genes in ELGs of SiNPs treatment.	69656	Pir	Unique rhythmic genes in ELGs of SD+SiNPs treatment.	321022	'Cdv3'	Shared rhythmic genes in ELGs among NC, SiNPs, SD+SiNPs treatments
207932	'Urb1'	Unique rhythmic genes in ELGs of NC treatment.	213484	Nudt18	Unique rhythmic genes in ELGs of SiNPs treatment.	69662	2310061I04Rik	Unique rhythmic genes in ELGs of SD+SiNPs treatment.	329540	'Nol4l'	Shared rhythmic genes in ELGs among NC, SiNPs, SD+SiNPs treatments
208795	'Tmem63a'	Unique rhythmic genes in ELGs of NC treatment.	213541	Ythdf2	Unique rhythmic genes in ELGs of SiNPs treatment.	69702	Ndufaf1	Unique rhythmic genes in ELGs of SD+SiNPs treatment.	329679	'Fnip2'	Shared rhythmic genes in ELGs among NC, SiNPs, SD+SiNPs treatments
208994	'Fam83b'	Unique rhythmic genes in ELGs of NC treatment.	214531	Tmprss13	Unique rhythmic genes in ELGs of SiNPs treatment.	69727	Usp46	Unique rhythmic genes in ELGs of SD+SiNPs treatment.	330406	'B4galnt3'	Shared rhythmic genes in ELGs among NC, SiNPs, SD+SiNPs treatments
209012	'Ulk4'	Unique rhythmic genes in ELGs of NC treatment.	214575	Tdrd5	Unique rhythmic genes in ELGs of SiNPs treatment.	69752	Zfp511	Unique rhythmic genes in ELGs of SD+SiNPs treatment.	330836	'Slc7a6'	Shared rhythmic genes in ELGs among NC, SiNPs, SD+SiNPs treatments
209131	'Snx30'	Unique rhythmic genes in ELGs of NC treatment.	214764	Edrf1	Unique rhythmic genes in ELGs of SiNPs treatment.	69774	Ms4a6b	Unique rhythmic genes in ELGs of SD+SiNPs treatment.	330963	'Ankdd1a'	Shared rhythmic genes in ELGs among NC, SiNPs, SD+SiNPs treatments
209212	'Osgin2'	Unique rhythmic genes in ELGs of NC treatment.	214917	Fam173a	Unique rhythmic genes in ELGs of SiNPs treatment.	69784	1500009L16Rik	Unique rhythmic genes in ELGs of SD+SiNPs treatment.	338320	'Mia2'	Shared rhythmic genes in ELGs among NC, SiNPs, SD+SiNPs treatments
209224	'Enox2'	Unique rhythmic genes in ELGs of NC treatment.	214987	Chtf8	Unique rhythmic genes in ELGs of SiNPs treatment.	69900	Mfsd11	Unique rhythmic genes in ELGs of SD+SiNPs treatment.	353172	'Gars'	Shared rhythmic genes in ELGs among NC, SiNPs, SD+SiNPs treatments
209497	'Tmem164'	Unique rhythmic genes in ELGs of NC treatment.	215114	Hip1	Unique rhythmic genes in ELGs of SiNPs treatment.	69906	Slc25a32	Unique rhythmic genes in ELGs of SD+SiNPs treatment.	353187	'Nr1d2'	Shared rhythmic genes in ELGs among NC, SiNPs, SD+SiNPs treatments
210126	'Lpp'	Unique rhythmic genes in ELGs of NC treatment.	215512	Fam117a	Unique rhythmic genes in ELGs of SiNPs treatment.	69912	Nup43	Unique rhythmic genes in ELGs of SD+SiNPs treatment.	380840	'Lyrm4'	Shared rhythmic genes in ELGs among NC, SiNPs, SD+SiNPs treatments
210146	'Irgq'	Unique rhythmic genes in ELGs of NC treatment.	215705	Arrdc1	Unique rhythmic genes in ELGs of SiNPs treatment.	69976	Galk2	Unique rhythmic genes in ELGs of SD+SiNPs treatment.	380967	'Tmem106c'	Shared rhythmic genes in ELGs among NC, SiNPs, SD+SiNPs treatments
210503	'Zfp677'	Unique rhythmic genes in ELGs of NC treatment.	216150	Cdc34	Unique rhythmic genes in ELGs of SiNPs treatment.	70012	Cep85	Unique rhythmic genes in ELGs of SD+SiNPs treatment.	381058	'Unc93a'	Shared rhythmic genes in ELGs among NC, SiNPs, SD+SiNPs treatments
210982	'Bicral'	Unique rhythmic genes in ELGs of NC treatment.	216197	Ckap4	Unique rhythmic genes in ELGs of SiNPs treatment.	70021	Nt5dc2	Unique rhythmic genes in ELGs of SD+SiNPs treatment.	381334	'Gal3st2'	Shared rhythmic genes in ELGs among NC, SiNPs, SD+SiNPs treatments
211651	'Fancd2'	Unique rhythmic genes in ELGs of NC treatment.	216345	Zfc3h1	Unique rhythmic genes in ELGs of SiNPs treatment.	70239	Gtf3c5	Unique rhythmic genes in ELGs of SD+SiNPs treatment.	381629	'Atraid'	Shared rhythmic genes in ELGs among NC, SiNPs, SD+SiNPs treatments
211770	'Trib1'	Unique rhythmic genes in ELGs of NC treatment.	216439	Agap2	Unique rhythmic genes in ELGs of SiNPs treatment.	70248	Dazap1	Unique rhythmic genes in ELGs of SD+SiNPs treatment.	383295	'Ypel5'	Shared rhythmic genes in ELGs among NC, SiNPs, SD+SiNPs treatments
211798	'Mfsd9'	Unique rhythmic genes in ELGs of NC treatment.	216853	Wrap53	Unique rhythmic genes in ELGs of SiNPs treatment.	70297	Gcc2	Unique rhythmic genes in ELGs of SD+SiNPs treatment.	432582	'Ccdc92b'	Shared rhythmic genes in ELGs among NC, SiNPs, SD+SiNPs treatments
211978	'Zfyve26'	Unique rhythmic genes in ELGs of NC treatment.	216864	Mgl2	Unique rhythmic genes in ELGs of SiNPs treatment.	70335	Reep6	Unique rhythmic genes in ELGs of SD+SiNPs treatment.	433904	'Ociad2'	Shared rhythmic genes in ELGs among NC, SiNPs, SD+SiNPs treatments
212114	'Nhlrc3'	Unique rhythmic genes in ELGs of NC treatment.	217012	Unc45b	Unique rhythmic genes in ELGs of SiNPs treatment.	70351	Ppp4r1	Unique rhythmic genes in ELGs of SD+SiNPs treatment.	434484	'Sp140'	Shared rhythmic genes in ELGs among NC, SiNPs, SD+SiNPs treatments
212167	'Gsap'	Unique rhythmic genes in ELGs of NC treatment.	217125	Samd14	Unique rhythmic genes in ELGs of SiNPs treatment.	70397	Tmem70	Unique rhythmic genes in ELGs of SD+SiNPs treatment.	546071	'Mast3'	Shared rhythmic genes in ELGs among NC, SiNPs, SD+SiNPs treatments
212168	'Zswim4'	Unique rhythmic genes in ELGs of NC treatment.	217138	Prr15l	Unique rhythmic genes in ELGs of SiNPs treatment.	70435	Inf2	Unique rhythmic genes in ELGs of SD+SiNPs treatment.	547253	'Parp14'	Shared rhythmic genes in ELGs among NC, SiNPs, SD+SiNPs treatments
212398	'Frat2'	Unique rhythmic genes in ELGs of NC treatment.	217140	Scrn2	Unique rhythmic genes in ELGs of SiNPs treatment.	70450	Unc13d	Unique rhythmic genes in ELGs of SD+SiNPs treatment.	620078	'C130026I21Rik'	Shared rhythmic genes in ELGs among NC, SiNPs, SD+SiNPs treatments
212569	'Zfp273'	Unique rhythmic genes in ELGs of NC treatment.	217198	Plekhh3	Unique rhythmic genes in ELGs of SiNPs treatment.	70470	Rprd1b	Unique rhythmic genes in ELGs of SD+SiNPs treatment.	622127	'Cyp3a57'	Shared rhythmic genes in ELGs among NC, SiNPs, SD+SiNPs treatments
212733	'Bicdl2'	Unique rhythmic genes in ELGs of NC treatment.	217216	BC030867	Unique rhythmic genes in ELGs of SiNPs treatment.	70551	Tmtc4	Unique rhythmic genes in ELGs of SD+SiNPs treatment.	622402	'Akr1c12'	Shared rhythmic genes in ELGs among NC, SiNPs, SD+SiNPs treatments
212772	'Arl14ep'	Unique rhythmic genes in ELGs of NC treatment.	217648	Gm527	Unique rhythmic genes in ELGs of SiNPs treatment.	70561	Txndc16	Unique rhythmic genes in ELGs of SD+SiNPs treatment.	628416	'Gm6878'	Shared rhythmic genes in ELGs among NC, SiNPs, SD+SiNPs treatments
212999	'Tnpo2'	Unique rhythmic genes in ELGs of NC treatment.	217664	Mgat2	Unique rhythmic genes in ELGs of SiNPs treatment.	70568	Cpne3	Unique rhythmic genes in ELGs of SD+SiNPs treatment.	665211	'Gm14326'	Shared rhythmic genes in ELGs among NC, SiNPs, SD+SiNPs treatments
213006	'Mfsd4a'	Unique rhythmic genes in ELGs of NC treatment.	217716	Mlh3	Unique rhythmic genes in ELGs of SiNPs treatment.	70575	Gfod2	Unique rhythmic genes in ELGs of SD+SiNPs treatment.	672511	'Rnf213'	Shared rhythmic genes in ELGs among NC, SiNPs, SD+SiNPs treatments
213019	'Pdlim2'	Unique rhythmic genes in ELGs of NC treatment.	217738	Ism2	Unique rhythmic genes in ELGs of SiNPs treatment.	70598	Filip1	Unique rhythmic genes in ELGs of SD+SiNPs treatment.	100037278	'Fam129c'	Shared rhythmic genes in ELGs among NC, SiNPs, SD+SiNPs treatments
213211	'Rnf26'	Unique rhythmic genes in ELGs of NC treatment.	217944	Rapgef5	Unique rhythmic genes in ELGs of SiNPs treatment.	70620	Ube2v2	Unique rhythmic genes in ELGs of SD+SiNPs treatment.	100041057	'LOC100041057'	Shared rhythmic genes in ELGs among NC, SiNPs, SD+SiNPs treatments
213550	'Dis3l'	Unique rhythmic genes in ELGs of NC treatment.	217995	Heatr1	Unique rhythmic genes in ELGs of SiNPs treatment.	70650	Zcchc8	Unique rhythmic genes in ELGs of SD+SiNPs treatment.	100041596	'Gal3st2b'	Shared rhythmic genes in ELGs among NC, SiNPs, SD+SiNPs treatments
213603	'Slc44a3'	Unique rhythmic genes in ELGs of NC treatment.	218138	Gmds	Unique rhythmic genes in ELGs of SiNPs treatment.	70809	Clec2g	Unique rhythmic genes in ELGs of SD+SiNPs treatment.	100463512	'Gm20594'	Shared rhythmic genes in ELGs among NC, SiNPs, SD+SiNPs treatments
213673	'9530068E07Rik'	Unique rhythmic genes in ELGs of NC treatment.	218343	Ttc37	Unique rhythmic genes in ELGs of SiNPs treatment.	70925	Cdkn2aip	Unique rhythmic genes in ELGs of SD+SiNPs treatment.	100503583	'Fsbp'	Shared rhythmic genes in ELGs among NC, SiNPs, SD+SiNPs treatments
214058	'Megf11'	Unique rhythmic genes in ELGs of NC treatment.	218461	Pde8b	Unique rhythmic genes in ELGs of SiNPs treatment.	70974	Pgm2l1	Unique rhythmic genes in ELGs of SD+SiNPs treatment.	100503659	'Cbarp'	Shared rhythmic genes in ELGs among NC, SiNPs, SD+SiNPs treatments
214063	'Dnajc16'	Unique rhythmic genes in ELGs of NC treatment.	218630	Ccno	Unique rhythmic genes in ELGs of SiNPs treatment.	70997	Spef1	Unique rhythmic genes in ELGs of SD+SiNPs treatment.	100504116	'Brd3os'	Shared rhythmic genes in ELGs among NC, SiNPs, SD+SiNPs treatments
214579	'Aldh5a1'	Unique rhythmic genes in ELGs of NC treatment.	219132	Phf11d	Unique rhythmic genes in ELGs of SiNPs treatment.	71099	Tssk4	Unique rhythmic genes in ELGs of SD+SiNPs treatment.	102577428	'Gm44501'	Shared rhythmic genes in ELGs among NC, SiNPs, SD+SiNPs treatments
214897	'Csnk1g1'	Unique rhythmic genes in ELGs of NC treatment.	223649	Nrbp2	Unique rhythmic genes in ELGs of SiNPs treatment.	71146	Golga7b	Unique rhythmic genes in ELGs of SD+SiNPs treatment.	102633783	'LOC102633783'	Shared rhythmic genes in ELGs among NC, SiNPs, SD+SiNPs treatments
215351	'Senp6'	Unique rhythmic genes in ELGs of NC treatment.	223775	Pim3	Unique rhythmic genes in ELGs of SiNPs treatment.	71148	Mier1	Unique rhythmic genes in ELGs of SD+SiNPs treatment.	108168936	'LOC108168936'	Shared rhythmic genes in ELGs among NC, SiNPs, SD+SiNPs treatments
215446	'Entpd3'	Unique rhythmic genes in ELGs of NC treatment.	224405	Cyyr1	Unique rhythmic genes in ELGs of SiNPs treatment.	71268	Lrrfip2	Unique rhythmic genes in ELGs of SD+SiNPs treatment.	115489330	'LOC115489330'	Shared rhythmic genes in ELGs among NC, SiNPs, SD+SiNPs treatments
215493	'A3galt2'	Unique rhythmic genes in ELGs of NC treatment.	224440	Setd4	Unique rhythmic genes in ELGs of SiNPs treatment.	71306	Mfap3l	Unique rhythmic genes in ELGs of SD+SiNPs treatment.	115490174	'LOC115490174'	Shared rhythmic genes in ELGs among NC, SiNPs, SD+SiNPs treatments
215494	'Pomgnt2'	Unique rhythmic genes in ELGs of NC treatment.	224624	Rab40c	Unique rhythmic genes in ELGs of SiNPs treatment.	71340	Riok1	Unique rhythmic genes in ELGs of SD+SiNPs treatment.			Shared rhythmic genes in ELGs among NC, SiNPs, SD+SiNPs treatments
215707	'Ccdc92'	Unique rhythmic genes in ELGs of NC treatment.	224792	Adgrf5	Unique rhythmic genes in ELGs of SiNPs treatment.	71361	Aifm2	Unique rhythmic genes in ELGs of SD+SiNPs treatment.			Shared rhythmic genes in ELGs among NC, SiNPs, SD+SiNPs treatments
215999	'Mcu'	Unique rhythmic genes in ELGs of NC treatment.	224796	Clic5	Unique rhythmic genes in ELGs of SiNPs treatment.	71492	Bbs7	Unique rhythmic genes in ELGs of SD+SiNPs treatment.			Shared rhythmic genes in ELGs among NC, SiNPs, SD+SiNPs treatments
216154	'Med16'	Unique rhythmic genes in ELGs of NC treatment.	224903	Safb	Unique rhythmic genes in ELGs of SiNPs treatment.	71521	Pds5a	Unique rhythmic genes in ELGs of SD+SiNPs treatment.			Shared rhythmic genes in ELGs among NC, SiNPs, SD+SiNPs treatments
216157	'Tmem259'	Unique rhythmic genes in ELGs of NC treatment.	227059	Slc39a10	Unique rhythmic genes in ELGs of SiNPs treatment.	71617	Armh3	Unique rhythmic genes in ELGs of SD+SiNPs treatment.			Shared rhythmic genes in ELGs among NC, SiNPs, SD+SiNPs treatments
216177	'AU041133'	Unique rhythmic genes in ELGs of NC treatment.	227290	Aamp	Unique rhythmic genes in ELGs of SiNPs treatment.	71667	Tmem248	Unique rhythmic genes in ELGs of SD+SiNPs treatment.			Shared rhythmic genes in ELGs among NC, SiNPs, SD+SiNPs treatments
216274	'Cep290'	Unique rhythmic genes in ELGs of NC treatment.	227377	Farp2	Unique rhythmic genes in ELGs of SiNPs treatment.	71675	0610010F05Rik	Unique rhythmic genes in ELGs of SD+SiNPs treatment.			Shared rhythmic genes in ELGs among NC, SiNPs, SD+SiNPs treatments
216292	'Mettl25'	Unique rhythmic genes in ELGs of NC treatment.	227449	Zcchc2	Unique rhythmic genes in ELGs of SiNPs treatment.	71702	Cdc5l	Unique rhythmic genes in ELGs of SD+SiNPs treatment.			Shared rhythmic genes in ELGs among NC, SiNPs, SD+SiNPs treatments
216438	'March9'	Unique rhythmic genes in ELGs of NC treatment.	227615	Tmem203	Unique rhythmic genes in ELGs of SiNPs treatment.	71772	Plbd2	Unique rhythmic genes in ELGs of SD+SiNPs treatment.			Shared rhythmic genes in ELGs among NC, SiNPs, SD+SiNPs treatments
216543	'Cep68'	Unique rhythmic genes in ELGs of NC treatment.	227648	Sec16a	Unique rhythmic genes in ELGs of SiNPs treatment.	71779	Marchf8	Unique rhythmic genes in ELGs of SD+SiNPs treatment.			Shared rhythmic genes in ELGs among NC, SiNPs, SD+SiNPs treatments
216724	'Rufy1'	Unique rhythmic genes in ELGs of NC treatment.	227656	Rexo4	Unique rhythmic genes in ELGs of SiNPs treatment.	71793	Ints12	Unique rhythmic genes in ELGs of SD+SiNPs treatment.			Shared rhythmic genes in ELGs among NC, SiNPs, SD+SiNPs treatments
216820	'Dhrs7b'	Unique rhythmic genes in ELGs of NC treatment.	228003	Klhl41	Unique rhythmic genes in ELGs of SiNPs treatment.	71799	Ptcd1	Unique rhythmic genes in ELGs of SD+SiNPs treatment.			Shared rhythmic genes in ELGs among NC, SiNPs, SD+SiNPs treatments
216825	'Usp22'	Unique rhythmic genes in ELGs of NC treatment.	228139	P2rx3	Unique rhythmic genes in ELGs of SiNPs treatment.	71877	Efhc1	Unique rhythmic genes in ELGs of SD+SiNPs treatment.			Shared rhythmic genes in ELGs among NC, SiNPs, SD+SiNPs treatments
216850	'Kdm6b'	Unique rhythmic genes in ELGs of NC treatment.	228775	Trib3	Unique rhythmic genes in ELGs of SiNPs treatment.	71881	Apmap	Unique rhythmic genes in ELGs of SD+SiNPs treatment.			Shared rhythmic genes in ELGs among NC, SiNPs, SD+SiNPs treatments
216877	'Dhx33'	Unique rhythmic genes in ELGs of NC treatment.	228869	Ncoa5	Unique rhythmic genes in ELGs of SiNPs treatment.	71893	Noxo1	Unique rhythmic genes in ELGs of SD+SiNPs treatment.			Shared rhythmic genes in ELGs among NC, SiNPs, SD+SiNPs treatments
216964	'Trp53i13'	Unique rhythmic genes in ELGs of NC treatment.	228994	Ythdf1	Unique rhythmic genes in ELGs of SiNPs treatment.	71900	Tmem106b	Unique rhythmic genes in ELGs of SD+SiNPs treatment.			Shared rhythmic genes in ELGs among NC, SiNPs, SD+SiNPs treatments
217057	'Ptrh2'	Unique rhythmic genes in ELGs of NC treatment.	229593	Golph3l	Unique rhythmic genes in ELGs of SiNPs treatment.	71909	Haus5	Unique rhythmic genes in ELGs of SD+SiNPs treatment.			Shared rhythmic genes in ELGs among NC, SiNPs, SD+SiNPs treatments
217201	'Rundc1'	Unique rhythmic genes in ELGs of NC treatment.	229898	Gbp5	Unique rhythmic genes in ELGs of SiNPs treatment.	71982	Snx10	Unique rhythmic genes in ELGs of SD+SiNPs treatment.			Shared rhythmic genes in ELGs among NC, SiNPs, SD+SiNPs treatments
217331	'Unk'	Unique rhythmic genes in ELGs of NC treatment.	229906	Gtf2b	Unique rhythmic genes in ELGs of SiNPs treatment.	71985	Acad10	Unique rhythmic genes in ELGs of SD+SiNPs treatment.			Shared rhythmic genes in ELGs among NC, SiNPs, SD+SiNPs treatments
217344	'Rhbdf2'	Unique rhythmic genes in ELGs of NC treatment.	230101	Gba2	Unique rhythmic genes in ELGs of SiNPs treatment.	71999	Fbxo22	Unique rhythmic genes in ELGs of SD+SiNPs treatment.			Shared rhythmic genes in ELGs among NC, SiNPs, SD+SiNPs treatments
217353	'Tmc6'	Unique rhythmic genes in ELGs of NC treatment.	230157	Tmeff1	Unique rhythmic genes in ELGs of SiNPs treatment.	72020	Zfp654	Unique rhythmic genes in ELGs of SD+SiNPs treatment.			Shared rhythmic genes in ELGs among NC, SiNPs, SD+SiNPs treatments
217370	'Cybc1'	Unique rhythmic genes in ELGs of NC treatment.	230936	Phf13	Unique rhythmic genes in ELGs of SiNPs treatment.	72029	Cnpy3	Unique rhythmic genes in ELGs of SD+SiNPs treatment.			Shared rhythmic genes in ELGs among NC, SiNPs, SD+SiNPs treatments
217700	'Acot6'	Unique rhythmic genes in ELGs of NC treatment.	231050	Galnt11	Unique rhythmic genes in ELGs of SiNPs treatment.	72049	Tnfrsf13c	Unique rhythmic genes in ELGs of SD+SiNPs treatment.			Shared rhythmic genes in ELGs among NC, SiNPs, SD+SiNPs treatments
218460	'Wdr41'	Unique rhythmic genes in ELGs of NC treatment.	231214	Cc2d2a	Unique rhythmic genes in ELGs of SiNPs treatment.	72054	Cyp4f18	Unique rhythmic genes in ELGs of SD+SiNPs treatment.			Shared rhythmic genes in ELGs among NC, SiNPs, SD+SiNPs treatments
218952	'Fermt2'	Unique rhythmic genes in ELGs of NC treatment.	231630	Ficd	Unique rhythmic genes in ELGs of SiNPs treatment.	72097	2010300C02Rik	Unique rhythmic genes in ELGs of SD+SiNPs treatment.			Shared rhythmic genes in ELGs among NC, SiNPs, SD+SiNPs treatments
218977	'Dlgap5'	Unique rhythmic genes in ELGs of NC treatment.	231717	Pheta1	Unique rhythmic genes in ELGs of SiNPs treatment.	72123	Ccdc71l	Unique rhythmic genes in ELGs of SD+SiNPs treatment.			Shared rhythmic genes in ELGs among NC, SiNPs, SD+SiNPs treatments
219024	'Pip4p1'	Unique rhythmic genes in ELGs of NC treatment.	231803	Mepce	Unique rhythmic genes in ELGs of SiNPs treatment.	72124	Seh1l	Unique rhythmic genes in ELGs of SD+SiNPs treatment.			Shared rhythmic genes in ELGs among NC, SiNPs, SD+SiNPs treatments
219114	'Ska3'	Unique rhythmic genes in ELGs of NC treatment.	232016	Itprid1	Unique rhythmic genes in ELGs of SiNPs treatment.	72144	Slc37a3	Unique rhythmic genes in ELGs of SD+SiNPs treatment.			Shared rhythmic genes in ELGs among NC, SiNPs, SD+SiNPs treatments
219158	'Ccar2'	Unique rhythmic genes in ELGs of NC treatment.	232854	Zfp418	Unique rhythmic genes in ELGs of SiNPs treatment.	72145	Wdfy3	Unique rhythmic genes in ELGs of SD+SiNPs treatment.			Shared rhythmic genes in ELGs among NC, SiNPs, SD+SiNPs treatments
223631	'Ly6g2'	Unique rhythmic genes in ELGs of NC treatment.	232875	Zscan18	Unique rhythmic genes in ELGs of SiNPs treatment.	72183	Snx6	Unique rhythmic genes in ELGs of SD+SiNPs treatment.			Shared rhythmic genes in ELGs among NC, SiNPs, SD+SiNPs treatments
223658	'Mroh1'	Unique rhythmic genes in ELGs of NC treatment.	232878	Zscan22	Unique rhythmic genes in ELGs of SiNPs treatment.	72265	Tram1	Unique rhythmic genes in ELGs of SD+SiNPs treatment.			Shared rhythmic genes in ELGs among NC, SiNPs, SD+SiNPs treatments
223666	'Arhgap39'	Unique rhythmic genes in ELGs of NC treatment.	232970	Phldb3	Unique rhythmic genes in ELGs of SiNPs treatment.	72318	Cyth4	Unique rhythmic genes in ELGs of SD+SiNPs treatment.			Shared rhythmic genes in ELGs among NC, SiNPs, SD+SiNPs treatments
223697	'Sun2'	Unique rhythmic genes in ELGs of NC treatment.	233056	Zfp790	Unique rhythmic genes in ELGs of SiNPs treatment.	72425	Katnbl1	Unique rhythmic genes in ELGs of SD+SiNPs treatment.			Shared rhythmic genes in ELGs among NC, SiNPs, SD+SiNPs treatments
223701	'Mrtfa'	Unique rhythmic genes in ELGs of NC treatment.	233071	Arhgap33	Unique rhythmic genes in ELGs of SiNPs treatment.	72614	Pih1d2	Unique rhythmic genes in ELGs of SD+SiNPs treatment.			Shared rhythmic genes in ELGs among NC, SiNPs, SD+SiNPs treatments
223920	'Soat2'	Unique rhythmic genes in ELGs of NC treatment.	233107	Kctd15	Unique rhythmic genes in ELGs of SiNPs treatment.	72674	Adipor1	Unique rhythmic genes in ELGs of SD+SiNPs treatment.			Shared rhythmic genes in ELGs among NC, SiNPs, SD+SiNPs treatments
223978	'Cpped1'	Unique rhythmic genes in ELGs of NC treatment.	233406	Prc1	Unique rhythmic genes in ELGs of SiNPs treatment.	72685	Dnajc6	Unique rhythmic genes in ELGs of SD+SiNPs treatment.			Shared rhythmic genes in ELGs among NC, SiNPs, SD+SiNPs treatments
224079	'Atp13a4'	Unique rhythmic genes in ELGs of NC treatment.	233529	Kctd14	Unique rhythmic genes in ELGs of SiNPs treatment.	72729	Cdc42se2	Unique rhythmic genes in ELGs of SD+SiNPs treatment.			Shared rhythmic genes in ELGs among NC, SiNPs, SD+SiNPs treatments
224432	'Scaf4'	Unique rhythmic genes in ELGs of NC treatment.	233893	Zfp764	Unique rhythmic genes in ELGs of SiNPs treatment.	72750	Fam117b	Unique rhythmic genes in ELGs of SD+SiNPs treatment.			Shared rhythmic genes in ELGs among NC, SiNPs, SD+SiNPs treatments
224530	'Acat3'	Unique rhythmic genes in ELGs of NC treatment.	234023	Arglu1	Unique rhythmic genes in ELGs of SiNPs treatment.	72759	Tmem135	Unique rhythmic genes in ELGs of SD+SiNPs treatment.			Shared rhythmic genes in ELGs among NC, SiNPs, SD+SiNPs treatments
224805	'Aars2'	Unique rhythmic genes in ELGs of NC treatment.	234076	Tmco3	Unique rhythmic genes in ELGs of SiNPs treatment.	72823	Pard3b	Unique rhythmic genes in ELGs of SD+SiNPs treatment.			Shared rhythmic genes in ELGs among NC, SiNPs, SD+SiNPs treatments
225131	'Wac'	Unique rhythmic genes in ELGs of NC treatment.	234258	Neil3	Unique rhythmic genes in ELGs of SiNPs treatment.	72825	Mon1a	Unique rhythmic genes in ELGs of SD+SiNPs treatment.			Shared rhythmic genes in ELGs among NC, SiNPs, SD+SiNPs treatments
225326	'Pik3c3'	Unique rhythmic genes in ELGs of NC treatment.	234549	Heatr3	Unique rhythmic genes in ELGs of SiNPs treatment.	72843	Prdm4	Unique rhythmic genes in ELGs of SD+SiNPs treatment.			Shared rhythmic genes in ELGs among NC, SiNPs, SD+SiNPs treatments
225642	'Grp'	Unique rhythmic genes in ELGs of NC treatment.	234686	Fhod1	Unique rhythmic genes in ELGs of SiNPs treatment.	72930	Ppp2r2b	Unique rhythmic genes in ELGs of SD+SiNPs treatment.			Shared rhythmic genes in ELGs among NC, SiNPs, SD+SiNPs treatments
225849	'Ppp2r5b'	Unique rhythmic genes in ELGs of NC treatment.	234723	Txnl4b	Unique rhythmic genes in ELGs of SiNPs treatment.	72946	Lrrc47	Unique rhythmic genes in ELGs of SD+SiNPs treatment.			Shared rhythmic genes in ELGs among NC, SiNPs, SD+SiNPs treatments
225884	'Gstp3'	Unique rhythmic genes in ELGs of NC treatment.	234797	6430548M08Rik	Unique rhythmic genes in ELGs of SiNPs treatment.	72948	Tppp	Unique rhythmic genes in ELGs of SD+SiNPs treatment.			Shared rhythmic genes in ELGs among NC, SiNPs, SD+SiNPs treatments
225888	'Kmt5b'	Unique rhythmic genes in ELGs of NC treatment.	235028	Zfp426	Unique rhythmic genes in ELGs of SiNPs treatment.	72972	Ccser2	Unique rhythmic genes in ELGs of SD+SiNPs treatment.			Shared rhythmic genes in ELGs among NC, SiNPs, SD+SiNPs treatments
226178	'Wbp1l'	Unique rhythmic genes in ELGs of NC treatment.	235431	Coro2b	Unique rhythmic genes in ELGs of SiNPs treatment.	72982	Tmem138	Unique rhythmic genes in ELGs of SD+SiNPs treatment.			Shared rhythmic genes in ELGs among NC, SiNPs, SD+SiNPs treatments
226414	'Dars'	Unique rhythmic genes in ELGs of NC treatment.	236848	Tmem185a	Unique rhythmic genes in ELGs of SiNPs treatment.	73062	Ppp1r16a	Unique rhythmic genes in ELGs of SD+SiNPs treatment.			Shared rhythmic genes in ELGs among NC, SiNPs, SD+SiNPs treatments
226422	'Rab29'	Unique rhythmic genes in ELGs of NC treatment.	237052	Tceal1	Unique rhythmic genes in ELGs of SiNPs treatment.	73068	Fut11	Unique rhythmic genes in ELGs of SD+SiNPs treatment.			Shared rhythmic genes in ELGs among NC, SiNPs, SD+SiNPs treatments
226849	'Ppp2r5a'	Unique rhythmic genes in ELGs of NC treatment.	237360	Adamts14	Unique rhythmic genes in ELGs of SiNPs treatment.	73102	Slc22a23	Unique rhythmic genes in ELGs of SD+SiNPs treatment.			Shared rhythmic genes in ELGs among NC, SiNPs, SD+SiNPs treatments
226856	'Lpgat1'	Unique rhythmic genes in ELGs of NC treatment.	237412	Gm4924	Unique rhythmic genes in ELGs of SiNPs treatment.	73178	Wasl	Unique rhythmic genes in ELGs of SD+SiNPs treatment.			Shared rhythmic genes in ELGs among NC, SiNPs, SD+SiNPs treatments
227333	'Dgkd'	Unique rhythmic genes in ELGs of NC treatment.	238037	Wdcp	Unique rhythmic genes in ELGs of SiNPs treatment.	73296	Rhobtb3	Unique rhythmic genes in ELGs of SD+SiNPs treatment.			Shared rhythmic genes in ELGs among NC, SiNPs, SD+SiNPs treatments
227446	'Relch'	Unique rhythmic genes in ELGs of NC treatment.	239096	Cdh24	Unique rhythmic genes in ELGs of SiNPs treatment.	73332	Ccdc30	Unique rhythmic genes in ELGs of SD+SiNPs treatment.			Shared rhythmic genes in ELGs among NC, SiNPs, SD+SiNPs treatments
227525	'Dclre1c'	Unique rhythmic genes in ELGs of NC treatment.	239102	Zfhx2	Unique rhythmic genes in ELGs of SiNPs treatment.	73385	Fam177a	Unique rhythmic genes in ELGs of SD+SiNPs treatment.			Shared rhythmic genes in ELGs among NC, SiNPs, SD+SiNPs treatments
227526	'Cdnf'	Unique rhythmic genes in ELGs of NC treatment.	239337	Adamts12	Unique rhythmic genes in ELGs of SiNPs treatment.	73490	Mipol1	Unique rhythmic genes in ELGs of SD+SiNPs treatment.			Shared rhythmic genes in ELGs among NC, SiNPs, SD+SiNPs treatments
227835	'Gtdc1'	Unique rhythmic genes in ELGs of NC treatment.	239833	Lmln	Unique rhythmic genes in ELGs of SiNPs treatment.	73681	Trmt11	Unique rhythmic genes in ELGs of SD+SiNPs treatment.			Shared rhythmic genes in ELGs among NC, SiNPs, SD+SiNPs treatments
227867	'Epc2'	Unique rhythmic genes in ELGs of NC treatment.	240067	Zfp952	Unique rhythmic genes in ELGs of SiNPs treatment.	73683	Atg16l2	Unique rhythmic genes in ELGs of SD+SiNPs treatment.			Shared rhythmic genes in ELGs among NC, SiNPs, SD+SiNPs treatments
227937	'Pkp4'	Unique rhythmic genes in ELGs of NC treatment.	240084	Cchcr1	Unique rhythmic genes in ELGs of SiNPs treatment.	73694	Ndufaf7	Unique rhythmic genes in ELGs of SD+SiNPs treatment.			Shared rhythmic genes in ELGs among NC, SiNPs, SD+SiNPs treatments
227960	'Gca'	Unique rhythmic genes in ELGs of NC treatment.	240514	Ccdc85b	Unique rhythmic genes in ELGs of SiNPs treatment.	73710	Tubb2b	Unique rhythmic genes in ELGs of SD+SiNPs treatment.			Shared rhythmic genes in ELGs among NC, SiNPs, SD+SiNPs treatments
228410	'Cstf3'	Unique rhythmic genes in ELGs of NC treatment.	241322	Zbtb6	Unique rhythmic genes in ELGs of SiNPs treatment.	73747	Shld1	Unique rhythmic genes in ELGs of SD+SiNPs treatment.			Shared rhythmic genes in ELGs among NC, SiNPs, SD+SiNPs treatments
228421	'Kif18a'	Unique rhythmic genes in ELGs of NC treatment.	241877	Slc10a5	Unique rhythmic genes in ELGs of SiNPs treatment.	73750	Whrn	Unique rhythmic genes in ELGs of SD+SiNPs treatment.			Shared rhythmic genes in ELGs among NC, SiNPs, SD+SiNPs treatments
228536	'Bahd1'	Unique rhythmic genes in ELGs of NC treatment.	241950	Bbs12	Unique rhythmic genes in ELGs of SiNPs treatment.	73826	Poldip3	Unique rhythmic genes in ELGs of SD+SiNPs treatment.			Shared rhythmic genes in ELGs among NC, SiNPs, SD+SiNPs treatments
228662	'Btbd3'	Unique rhythmic genes in ELGs of NC treatment.	242050	Igsf10	Unique rhythmic genes in ELGs of SiNPs treatment.	74039	Nfam1	Unique rhythmic genes in ELGs of SD+SiNPs treatment.			Shared rhythmic genes in ELGs among NC, SiNPs, SD+SiNPs treatments
228769	'Psmf1'	Unique rhythmic genes in ELGs of NC treatment.	242484	D630039A03Rik	Unique rhythmic genes in ELGs of SiNPs treatment.	74043	Pex26	Unique rhythmic genes in ELGs of SD+SiNPs treatment.			Shared rhythmic genes in ELGs among NC, SiNPs, SD+SiNPs treatments
228790	'Asxl1'	Unique rhythmic genes in ELGs of NC treatment.	242584	Wdr78	Unique rhythmic genes in ELGs of SiNPs treatment.	74103	Nebl	Unique rhythmic genes in ELGs of SD+SiNPs treatment.			Shared rhythmic genes in ELGs among NC, SiNPs, SD+SiNPs treatments
228866	'Pcif1'	Unique rhythmic genes in ELGs of NC treatment.	242705	E2f2	Unique rhythmic genes in ELGs of SiNPs treatment.	74106	Dcaf6	Unique rhythmic genes in ELGs of SD+SiNPs treatment.			Shared rhythmic genes in ELGs among NC, SiNPs, SD+SiNPs treatments
229473	'Tmem131l'	Unique rhythmic genes in ELGs of NC treatment.	243510	Ccdc142	Unique rhythmic genes in ELGs of SiNPs treatment.	74117	Actr3	Unique rhythmic genes in ELGs of SD+SiNPs treatment.			Shared rhythmic genes in ELGs among NC, SiNPs, SD+SiNPs treatments
229503	'Rrnad1'	Unique rhythmic genes in ELGs of NC treatment.	244911	C2cd4a	Unique rhythmic genes in ELGs of SiNPs treatment.	74142	Lonp1	Unique rhythmic genes in ELGs of SD+SiNPs treatment.			Shared rhythmic genes in ELGs among NC, SiNPs, SD+SiNPs treatments
229524	'Msto1'	Unique rhythmic genes in ELGs of NC treatment.	245020	Slc35g2	Unique rhythmic genes in ELGs of SiNPs treatment.	74158	Josd1	Unique rhythmic genes in ELGs of SD+SiNPs treatment.			Shared rhythmic genes in ELGs among NC, SiNPs, SD+SiNPs treatments
229588	'Gm128'	Unique rhythmic genes in ELGs of NC treatment.	245638	Tbc1d8b	Unique rhythmic genes in ELGs of SiNPs treatment.	74192	Arpc5l	Unique rhythmic genes in ELGs of SD+SiNPs treatment.			Shared rhythmic genes in ELGs among NC, SiNPs, SD+SiNPs treatments
229589	'Prune1'	Unique rhythmic genes in ELGs of NC treatment.	245827	Fat2	Unique rhythmic genes in ELGs of SiNPs treatment.	74195	Elp3	Unique rhythmic genes in ELGs of SD+SiNPs treatment.			Shared rhythmic genes in ELGs among NC, SiNPs, SD+SiNPs treatments
229595	'Adamtsl4'	Unique rhythmic genes in ELGs of NC treatment.	246738	Dnajc28	Unique rhythmic genes in ELGs of SiNPs treatment.	74246	Gale	Unique rhythmic genes in ELGs of SD+SiNPs treatment.			Shared rhythmic genes in ELGs among NC, SiNPs, SD+SiNPs treatments
230603	'Ttc39a'	Unique rhythmic genes in ELGs of NC treatment.	268860	Abat	Unique rhythmic genes in ELGs of SiNPs treatment.	74322	Cxxc1	Unique rhythmic genes in ELGs of SD+SiNPs treatment.			Shared rhythmic genes in ELGs among NC, SiNPs, SD+SiNPs treatments
230661	'Tesk2'	Unique rhythmic genes in ELGs of NC treatment.	269209	Stk36	Unique rhythmic genes in ELGs of SiNPs treatment.	74412	Gle1	Unique rhythmic genes in ELGs of SD+SiNPs treatment.			Shared rhythmic genes in ELGs among NC, SiNPs, SD+SiNPs treatments
230674	'Kdm4a'	Unique rhythmic genes in ELGs of NC treatment.	269397	Ss18l1	Unique rhythmic genes in ELGs of SiNPs treatment.	74442	Sgms2	Unique rhythmic genes in ELGs of SD+SiNPs treatment.			Shared rhythmic genes in ELGs among NC, SiNPs, SD+SiNPs treatments
230696	'AU022252'	Unique rhythmic genes in ELGs of NC treatment.	269523	Vcp	Unique rhythmic genes in ELGs of SiNPs treatment.	74467	Pus10	Unique rhythmic genes in ELGs of SD+SiNPs treatment.			Shared rhythmic genes in ELGs among NC, SiNPs, SD+SiNPs treatments
230700	'Foxj3'	Unique rhythmic genes in ELGs of NC treatment.	269582	Clspn	Unique rhythmic genes in ELGs of SiNPs treatment.	74470	Cep72	Unique rhythmic genes in ELGs of SD+SiNPs treatment.			Shared rhythmic genes in ELGs among NC, SiNPs, SD+SiNPs treatments
230767	'Iqcc'	Unique rhythmic genes in ELGs of NC treatment.	269615	Plch2	Unique rhythmic genes in ELGs of SiNPs treatment.	74493	Tnks2	Unique rhythmic genes in ELGs of SD+SiNPs treatment.			Shared rhythmic genes in ELGs among NC, SiNPs, SD+SiNPs treatments
230861	'Eif4g3'	Unique rhythmic genes in ELGs of NC treatment.	269693	Ccdc60	Unique rhythmic genes in ELGs of SiNPs treatment.	74525	Fam234b	Unique rhythmic genes in ELGs of SD+SiNPs treatment.			Shared rhythmic genes in ELGs among NC, SiNPs, SD+SiNPs treatments
230917	'Tmem201'	Unique rhythmic genes in ELGs of NC treatment.	269695	Rnft2	Unique rhythmic genes in ELGs of SiNPs treatment.	74533	Gzf1	Unique rhythmic genes in ELGs of SD+SiNPs treatment.			Shared rhythmic genes in ELGs among NC, SiNPs, SD+SiNPs treatments
231042	'Nupl2'	Unique rhythmic genes in ELGs of NC treatment.	269823	Pon3	Unique rhythmic genes in ELGs of SiNPs treatment.	74617	Scpep1	Unique rhythmic genes in ELGs of SD+SiNPs treatment.			Shared rhythmic genes in ELGs among NC, SiNPs, SD+SiNPs treatments
231279	'Guf1'	Unique rhythmic genes in ELGs of NC treatment.	270066	Slc35e1	Unique rhythmic genes in ELGs of SiNPs treatment.	74682	Wdr35	Unique rhythmic genes in ELGs of SD+SiNPs treatment.			Shared rhythmic genes in ELGs among NC, SiNPs, SD+SiNPs treatments
231474	'Paqr3'	Unique rhythmic genes in ELGs of NC treatment.	270086	Ogfod1	Unique rhythmic genes in ELGs of SiNPs treatment.	74781	Wipi2	Unique rhythmic genes in ELGs of SD+SiNPs treatment.			Shared rhythmic genes in ELGs among NC, SiNPs, SD+SiNPs treatments
231600	'Chfr'	Unique rhythmic genes in ELGs of NC treatment.	270096	Mon1b	Unique rhythmic genes in ELGs of SiNPs treatment.	75051	Ccdc173	Unique rhythmic genes in ELGs of SD+SiNPs treatment.			Shared rhythmic genes in ELGs among NC, SiNPs, SD+SiNPs treatments
231712	'Trafd1'	Unique rhythmic genes in ELGs of NC treatment.	270627	Taf1	Unique rhythmic genes in ELGs of SiNPs treatment.	75137	Rprd2	Unique rhythmic genes in ELGs of SD+SiNPs treatment.			Shared rhythmic genes in ELGs among NC, SiNPs, SD+SiNPs treatments
231769	'Sfswap'	Unique rhythmic genes in ELGs of NC treatment.	270906	Prr11	Unique rhythmic genes in ELGs of SiNPs treatment.	75202	Spaca6	Unique rhythmic genes in ELGs of SD+SiNPs treatment.			Shared rhythmic genes in ELGs among NC, SiNPs, SD+SiNPs treatments
231841	'Brat1'	Unique rhythmic genes in ELGs of NC treatment.	271221	Rubcnl	Unique rhythmic genes in ELGs of SiNPs treatment.	75292	Prkd3	Unique rhythmic genes in ELGs of SD+SiNPs treatment.			Shared rhythmic genes in ELGs among NC, SiNPs, SD+SiNPs treatments
231871	'Daglb'	Unique rhythmic genes in ELGs of NC treatment.	271849	Shc4	Unique rhythmic genes in ELGs of SiNPs treatment.	75345	Slamf7	Unique rhythmic genes in ELGs of SD+SiNPs treatment.			Shared rhythmic genes in ELGs among NC, SiNPs, SD+SiNPs treatments
231986	'Jazf1'	Unique rhythmic genes in ELGs of NC treatment.	277939	C2cd3	Unique rhythmic genes in ELGs of SiNPs treatment.	75516	Ttc32	Unique rhythmic genes in ELGs of SD+SiNPs treatment.			Shared rhythmic genes in ELGs among NC, SiNPs, SD+SiNPs treatments
231999	'Plekha8'	Unique rhythmic genes in ELGs of NC treatment.	279029	Stkld1	Unique rhythmic genes in ELGs of SiNPs treatment.	75613	Med25	Unique rhythmic genes in ELGs of SD+SiNPs treatment.			Shared rhythmic genes in ELGs among NC, SiNPs, SD+SiNPs treatments
232288	'Frmd4b'	Unique rhythmic genes in ELGs of NC treatment.	286942	Kif19a	Unique rhythmic genes in ELGs of SiNPs treatment.	75723	Amotl1	Unique rhythmic genes in ELGs of SD+SiNPs treatment.			Shared rhythmic genes in ELGs among NC, SiNPs, SD+SiNPs treatments
232679	'Zc3hc1'	Unique rhythmic genes in ELGs of NC treatment.	319149	H3c4	Unique rhythmic genes in ELGs of SiNPs treatment.	75734	Mff	Unique rhythmic genes in ELGs of SD+SiNPs treatment.			Shared rhythmic genes in ELGs among NC, SiNPs, SD+SiNPs treatments
232944	'Mark4'	Unique rhythmic genes in ELGs of NC treatment.	319160	H4c12	Unique rhythmic genes in ELGs of SiNPs treatment.	75744	Svip	Unique rhythmic genes in ELGs of SD+SiNPs treatment.			Shared rhythmic genes in ELGs among NC, SiNPs, SD+SiNPs treatments
232946	'Bloc1s3'	Unique rhythmic genes in ELGs of NC treatment.	319195	Rpl17	Unique rhythmic genes in ELGs of SiNPs treatment.	75788	Smurf1	Unique rhythmic genes in ELGs of SD+SiNPs treatment.			Shared rhythmic genes in ELGs among NC, SiNPs, SD+SiNPs treatments
232975	'Atp1a3'	Unique rhythmic genes in ELGs of NC treatment.	319262	Fchsd1	Unique rhythmic genes in ELGs of SiNPs treatment.	76108	Rap2a	Unique rhythmic genes in ELGs of SD+SiNPs treatment.			Shared rhythmic genes in ELGs among NC, SiNPs, SD+SiNPs treatments
233033	'Samd4b'	Unique rhythmic genes in ELGs of NC treatment.	319278	Shfl	Unique rhythmic genes in ELGs of SiNPs treatment.	76130	Las1l	Unique rhythmic genes in ELGs of SD+SiNPs treatment.			Shared rhythmic genes in ELGs among NC, SiNPs, SD+SiNPs treatments
233204	'Tbc1d17'	Unique rhythmic genes in ELGs of NC treatment.	319998	Tmem198	Unique rhythmic genes in ELGs of SiNPs treatment.	76295	Atp11b	Unique rhythmic genes in ELGs of SD+SiNPs treatment.			Shared rhythmic genes in ELGs among NC, SiNPs, SD+SiNPs treatments
233328	'Lrrk1'	Unique rhythmic genes in ELGs of NC treatment.	320129	Grk3	Unique rhythmic genes in ELGs of SiNPs treatment.	76332	Cog2	Unique rhythmic genes in ELGs of SD+SiNPs treatment.			Shared rhythmic genes in ELGs among NC, SiNPs, SD+SiNPs treatments
233332	'Adamts17'	Unique rhythmic genes in ELGs of NC treatment.	320213	Senp5	Unique rhythmic genes in ELGs of SiNPs treatment.	76355	Tgds	Unique rhythmic genes in ELGs of SD+SiNPs treatment.			Shared rhythmic genes in ELGs among NC, SiNPs, SD+SiNPs treatments
233571	'P2ry6'	Unique rhythmic genes in ELGs of NC treatment.	320271	Scai	Unique rhythmic genes in ELGs of SiNPs treatment.	76498	Paqr4	Unique rhythmic genes in ELGs of SD+SiNPs treatment.			Shared rhythmic genes in ELGs among NC, SiNPs, SD+SiNPs treatments
233575	'Pgap2'	Unique rhythmic genes in ELGs of NC treatment.	320557	Fam169a	Unique rhythmic genes in ELGs of SiNPs treatment.	76510	Trappc9	Unique rhythmic genes in ELGs of SD+SiNPs treatment.			Shared rhythmic genes in ELGs among NC, SiNPs, SD+SiNPs treatments
233789	'Smg1'	Unique rhythmic genes in ELGs of NC treatment.	320683	Zfp629	Unique rhythmic genes in ELGs of SiNPs treatment.	76522	Lsm8	Unique rhythmic genes in ELGs of SD+SiNPs treatment.			Shared rhythmic genes in ELGs among NC, SiNPs, SD+SiNPs treatments
233833	'Tnrc6a'	Unique rhythmic genes in ELGs of NC treatment.	320736	Vstm4	Unique rhythmic genes in ELGs of SiNPs treatment.	76574	Mfsd2a	Unique rhythmic genes in ELGs of SD+SiNPs treatment.			Shared rhythmic genes in ELGs among NC, SiNPs, SD+SiNPs treatments
233900	'Rnf40'	Unique rhythmic genes in ELGs of NC treatment.	320806	Gfm2	Unique rhythmic genes in ELGs of SiNPs treatment.	76740	Efr3a	Unique rhythmic genes in ELGs of SD+SiNPs treatment.			Shared rhythmic genes in ELGs among NC, SiNPs, SD+SiNPs treatments
234362	'Zfp868'	Unique rhythmic genes in ELGs of NC treatment.	320816	Ankrd16	Unique rhythmic genes in ELGs of SiNPs treatment.	76832	Hyls1	Unique rhythmic genes in ELGs of SD+SiNPs treatment.			Shared rhythmic genes in ELGs among NC, SiNPs, SD+SiNPs treatments
234595	'Slc38a7'	Unique rhythmic genes in ELGs of NC treatment.	320844	Amigo3	Unique rhythmic genes in ELGs of SiNPs treatment.	76843	Dtl	Unique rhythmic genes in ELGs of SD+SiNPs treatment.			Shared rhythmic genes in ELGs among NC, SiNPs, SD+SiNPs treatments
234663	'Dync1li2'	Unique rhythmic genes in ELGs of NC treatment.	321003	Xpnpep3	Unique rhythmic genes in ELGs of SiNPs treatment.	76890	Memo1	Unique rhythmic genes in ELGs of SD+SiNPs treatment.			Shared rhythmic genes in ELGs among NC, SiNPs, SD+SiNPs treatments
234678	'D230025D16Rik'	Unique rhythmic genes in ELGs of NC treatment.	328110	Prpf39	Unique rhythmic genes in ELGs of SiNPs treatment.	76959	Chmp5	Unique rhythmic genes in ELGs of SD+SiNPs treatment.			Shared rhythmic genes in ELGs among NC, SiNPs, SD+SiNPs treatments
234733	'Ddx19b'	Unique rhythmic genes in ELGs of NC treatment.	329055	Lipo1	Unique rhythmic genes in ELGs of SiNPs treatment.	77040	Atg16l1	Unique rhythmic genes in ELGs of SD+SiNPs treatment.			Shared rhythmic genes in ELGs among NC, SiNPs, SD+SiNPs treatments
234796	'Klhl36'	Unique rhythmic genes in ELGs of NC treatment.	329165	Abi2	Unique rhythmic genes in ELGs of SiNPs treatment.	77045	Bcl7a	Unique rhythmic genes in ELGs of SD+SiNPs treatment.			Shared rhythmic genes in ELGs among NC, SiNPs, SD+SiNPs treatments
235041	'Kank2'	Unique rhythmic genes in ELGs of NC treatment.	329506	Ctdspl2	Unique rhythmic genes in ELGs of SiNPs treatment.	77053	Sun1	Unique rhythmic genes in ELGs of SD+SiNPs treatment.			Shared rhythmic genes in ELGs among NC, SiNPs, SD+SiNPs treatments
235050	'Zfp810'	Unique rhythmic genes in ELGs of NC treatment.	329731	Tafa3	Unique rhythmic genes in ELGs of SiNPs treatment.	77056	Tmco4	Unique rhythmic genes in ELGs of SD+SiNPs treatment.			Shared rhythmic genes in ELGs among NC, SiNPs, SD+SiNPs treatments
235293	'Sc5d'	Unique rhythmic genes in ELGs of NC treatment.	329777	Pigk	Unique rhythmic genes in ELGs of SiNPs treatment.	77125	Il33	Unique rhythmic genes in ELGs of SD+SiNPs treatment.			Shared rhythmic genes in ELGs among NC, SiNPs, SD+SiNPs treatments
235320	'Zbtb16'	Unique rhythmic genes in ELGs of NC treatment.	329972	Spata21	Unique rhythmic genes in ELGs of SiNPs treatment.	77254	Yif1b	Unique rhythmic genes in ELGs of SD+SiNPs treatment.			Shared rhythmic genes in ELGs among NC, SiNPs, SD+SiNPs treatments
235344	'Sik2'	Unique rhythmic genes in ELGs of NC treatment.	330301	Zfp786	Unique rhythmic genes in ELGs of SiNPs treatment.	77559	Agl	Unique rhythmic genes in ELGs of SD+SiNPs treatment.			Shared rhythmic genes in ELGs among NC, SiNPs, SD+SiNPs treatments
235542	'Ppp2r3a'	Unique rhythmic genes in ELGs of NC treatment.	330450	Far2	Unique rhythmic genes in ELGs of SiNPs treatment.	77766	Elp4	Unique rhythmic genes in ELGs of SD+SiNPs treatment.			Shared rhythmic genes in ELGs among NC, SiNPs, SD+SiNPs treatments
235582	'Glyctk'	Unique rhythmic genes in ELGs of NC treatment.	330657	Prss53	Unique rhythmic genes in ELGs of SiNPs treatment.	78038	Mccc2	Unique rhythmic genes in ELGs of SD+SiNPs treatment.			Shared rhythmic genes in ELGs among NC, SiNPs, SD+SiNPs treatments
235661	'Dync1li1'	Unique rhythmic genes in ELGs of NC treatment.	330790	Hapln4	Unique rhythmic genes in ELGs of SiNPs treatment.	78232	Trappc6b	Unique rhythmic genes in ELGs of SD+SiNPs treatment.			Shared rhythmic genes in ELGs among NC, SiNPs, SD+SiNPs treatments
236874	'Gm14743'	Unique rhythmic genes in ELGs of NC treatment.	332934	Zmynd12	Unique rhythmic genes in ELGs of SiNPs treatment.	78267	Klhdc8b	Unique rhythmic genes in ELGs of SD+SiNPs treatment.			Shared rhythmic genes in ELGs among NC, SiNPs, SD+SiNPs treatments
237175	'Adgrg2'	Unique rhythmic genes in ELGs of NC treatment.	338348	Ttc16	Unique rhythmic genes in ELGs of SiNPs treatment.	78309	Cul9	Unique rhythmic genes in ELGs of SD+SiNPs treatment.			Shared rhythmic genes in ELGs among NC, SiNPs, SD+SiNPs treatments
237211	'Fancb'	Unique rhythmic genes in ELGs of NC treatment.	353310	Zfp703	Unique rhythmic genes in ELGs of SiNPs treatment.	78473	Skap1	Unique rhythmic genes in ELGs of SD+SiNPs treatment.			Shared rhythmic genes in ELGs among NC, SiNPs, SD+SiNPs treatments
237256	'Zc3h12d'	Unique rhythmic genes in ELGs of NC treatment.	353502	Hcfc1r1	Unique rhythmic genes in ELGs of SiNPs treatment.	78523	Mrpl9	Unique rhythmic genes in ELGs of SD+SiNPs treatment.			Shared rhythmic genes in ELGs among NC, SiNPs, SD+SiNPs treatments
237504	'Rassf9'	Unique rhythmic genes in ELGs of NC treatment.	373864	Col27a1	Unique rhythmic genes in ELGs of SiNPs treatment.	78558	Htra3	Unique rhythmic genes in ELGs of SD+SiNPs treatment.			Shared rhythmic genes in ELGs among NC, SiNPs, SD+SiNPs treatments
237711	'Eml6'	Unique rhythmic genes in ELGs of NC treatment.	380601	Fastkd5	Unique rhythmic genes in ELGs of SiNPs treatment.	78610	Uvrag	Unique rhythmic genes in ELGs of SD+SiNPs treatment.			Shared rhythmic genes in ELGs among NC, SiNPs, SD+SiNPs treatments
237781	'Mief2'	Unique rhythmic genes in ELGs of NC treatment.	380660	Acss3	Unique rhythmic genes in ELGs of SiNPs treatment.	78651	Lsm6	Unique rhythmic genes in ELGs of SD+SiNPs treatment.			Shared rhythmic genes in ELGs among NC, SiNPs, SD+SiNPs treatments
237860	'Ssh2'	Unique rhythmic genes in ELGs of NC treatment.	380701	Slc47a2	Unique rhythmic genes in ELGs of SiNPs treatment.	78753	Lipm	Unique rhythmic genes in ELGs of SD+SiNPs treatment.			Shared rhythmic genes in ELGs among NC, SiNPs, SD+SiNPs treatments
237898	'Usp32'	Unique rhythmic genes in ELGs of NC treatment.	380713	Scarf1	Unique rhythmic genes in ELGs of SiNPs treatment.	78777	Tepsin	Unique rhythmic genes in ELGs of SD+SiNPs treatment.			Shared rhythmic genes in ELGs among NC, SiNPs, SD+SiNPs treatments
237943	'Gpatch8'	Unique rhythmic genes in ELGs of NC treatment.	380714	Rph3al	Unique rhythmic genes in ELGs of SiNPs treatment.	78781	Zc3hav1	Unique rhythmic genes in ELGs of SD+SiNPs treatment.			Shared rhythmic genes in ELGs among NC, SiNPs, SD+SiNPs treatments
238276	'Akap5'	Unique rhythmic genes in ELGs of NC treatment.	380993	Zfat	Unique rhythmic genes in ELGs of SiNPs treatment.	78891	Scyl1	Unique rhythmic genes in ELGs of SD+SiNPs treatment.			Shared rhythmic genes in ELGs among NC, SiNPs, SD+SiNPs treatments
238317	'Elmsan1'	Unique rhythmic genes in ELGs of NC treatment.	381175	Ccdc68	Unique rhythmic genes in ELGs of SiNPs treatment.	78893	Cnot10	Unique rhythmic genes in ELGs of SD+SiNPs treatment.			Shared rhythmic genes in ELGs among NC, SiNPs, SD+SiNPs treatments
238330	'Irf2bpl'	Unique rhythmic genes in ELGs of NC treatment.	381353	Ajm1	Unique rhythmic genes in ELGs of SiNPs treatment.	78943	Ern1	Unique rhythmic genes in ELGs of SD+SiNPs treatment.			Shared rhythmic genes in ELGs among NC, SiNPs, SD+SiNPs treatments
239510	'Phf20l1'	Unique rhythmic genes in ELGs of NC treatment.	381678	Zcwpw1	Unique rhythmic genes in ELGs of SiNPs treatment.	79196	Osbpl5	Unique rhythmic genes in ELGs of SD+SiNPs treatment.			Shared rhythmic genes in ELGs among NC, SiNPs, SD+SiNPs treatments
239606	'Slc2a13'	Unique rhythmic genes in ELGs of NC treatment.	382030	Cnep1r1	Unique rhythmic genes in ELGs of SiNPs treatment.	79263	Trim39	Unique rhythmic genes in ELGs of SD+SiNPs treatment.			Shared rhythmic genes in ELGs among NC, SiNPs, SD+SiNPs treatments
239759	'Liph'	Unique rhythmic genes in ELGs of NC treatment.	382073	Ccdc84	Unique rhythmic genes in ELGs of SiNPs treatment.	80286	Tusc3	Unique rhythmic genes in ELGs of SD+SiNPs treatment.			Shared rhythmic genes in ELGs among NC, SiNPs, SD+SiNPs treatments
240590	'Dmrt3'	Unique rhythmic genes in ELGs of NC treatment.	382245	Tmem29	Unique rhythmic genes in ELGs of SiNPs treatment.	80749	Lrfn1	Unique rhythmic genes in ELGs of SD+SiNPs treatment.			Shared rhythmic genes in ELGs among NC, SiNPs, SD+SiNPs treatments
240633	'Lipk'	Unique rhythmic genes in ELGs of NC treatment.	382253	Cdkl5	Unique rhythmic genes in ELGs of SiNPs treatment.	80751	Rnf34	Unique rhythmic genes in ELGs of SD+SiNPs treatment.			Shared rhythmic genes in ELGs among NC, SiNPs, SD+SiNPs treatments
240641	'Kif20b'	Unique rhythmic genes in ELGs of NC treatment.	387609	Zhx2	Unique rhythmic genes in ELGs of SiNPs treatment.	80795	Selenok	Unique rhythmic genes in ELGs of SD+SiNPs treatment.			Shared rhythmic genes in ELGs among NC, SiNPs, SD+SiNPs treatments
240756	'Klhl12'	Unique rhythmic genes in ELGs of NC treatment.	399568	BC052040	Unique rhythmic genes in ELGs of SiNPs treatment.	80913	Pum2	Unique rhythmic genes in ELGs of SD+SiNPs treatment.			Shared rhythmic genes in ELGs among NC, SiNPs, SD+SiNPs treatments
240869	'Zbtb37'	Unique rhythmic genes in ELGs of NC treatment.	403185	Cfap97d2	Unique rhythmic genes in ELGs of SiNPs treatment.	81840	Sorcs2	Unique rhythmic genes in ELGs of SD+SiNPs treatment.			Shared rhythmic genes in ELGs among NC, SiNPs, SD+SiNPs treatments
240880	'Scyl3'	Unique rhythmic genes in ELGs of NC treatment.	403187	Opa3	Unique rhythmic genes in ELGs of SiNPs treatment.	83433	Trem2	Unique rhythmic genes in ELGs of SD+SiNPs treatment.			Shared rhythmic genes in ELGs among NC, SiNPs, SD+SiNPs treatments
241311	'Zbtb34'	Unique rhythmic genes in ELGs of NC treatment.	407819	BC031181	Unique rhythmic genes in ELGs of SiNPs treatment.	83703	Dbr1	Unique rhythmic genes in ELGs of SD+SiNPs treatment.			Shared rhythmic genes in ELGs among NC, SiNPs, SD+SiNPs treatments
241639	'Fermt1'	Unique rhythmic genes in ELGs of NC treatment.	408067	Zfp874b	Unique rhythmic genes in ELGs of SiNPs treatment.	83814	Nedd4l	Unique rhythmic genes in ELGs of SD+SiNPs treatment.			Shared rhythmic genes in ELGs among NC, SiNPs, SD+SiNPs treatments
241694	'Ralgapa2'	Unique rhythmic genes in ELGs of NC treatment.	414077	Wdr83os	Unique rhythmic genes in ELGs of SiNPs treatment.	83924	Gpr137b	Unique rhythmic genes in ELGs of SD+SiNPs treatment.			Shared rhythmic genes in ELGs among NC, SiNPs, SD+SiNPs treatments
242083	'Ppm1l'	Unique rhythmic genes in ELGs of NC treatment.	415115	Neurl2	Unique rhythmic genes in ELGs of SiNPs treatment.	83962	Btbd1	Unique rhythmic genes in ELGs of SD+SiNPs treatment.			Shared rhythmic genes in ELGs among NC, SiNPs, SD+SiNPs treatments
242109	'Zfp697'	Unique rhythmic genes in ELGs of NC treatment.	432480	Gm1553	Unique rhythmic genes in ELGs of SiNPs treatment.	83997	Slmap	Unique rhythmic genes in ELGs of SD+SiNPs treatment.			Shared rhythmic genes in ELGs among NC, SiNPs, SD+SiNPs treatments
242384	'Lingo2'	Unique rhythmic genes in ELGs of NC treatment.	432731	Zscan26	Unique rhythmic genes in ELGs of SiNPs treatment.	84035	Kremen1	Unique rhythmic genes in ELGs of SD+SiNPs treatment.			Shared rhythmic genes in ELGs among NC, SiNPs, SD+SiNPs treatments
242406	'Rgp1'	Unique rhythmic genes in ELGs of NC treatment.	432769	Zfp708	Unique rhythmic genes in ELGs of SiNPs treatment.	84113	Ptov1	Unique rhythmic genes in ELGs of SD+SiNPs treatment.			Shared rhythmic genes in ELGs among NC, SiNPs, SD+SiNPs treatments
242425	'Gabbr2'	Unique rhythmic genes in ELGs of NC treatment.	432779	Lrrc14b	Unique rhythmic genes in ELGs of SiNPs treatment.	93684	Selenof	Unique rhythmic genes in ELGs of SD+SiNPs treatment.			Shared rhythmic genes in ELGs among NC, SiNPs, SD+SiNPs treatments
242474	'Tmem245'	Unique rhythmic genes in ELGs of NC treatment.	432995	Smim22	Unique rhythmic genes in ELGs of SiNPs treatment.	93692	Glrx	Unique rhythmic genes in ELGs of SD+SiNPs treatment.			Shared rhythmic genes in ELGs among NC, SiNPs, SD+SiNPs treatments
242594	'Fyb2'	Unique rhythmic genes in ELGs of NC treatment.	433022	Plcxd2	Unique rhythmic genes in ELGs of SiNPs treatment.	93737	Pard6g	Unique rhythmic genes in ELGs of SD+SiNPs treatment.			Shared rhythmic genes in ELGs among NC, SiNPs, SD+SiNPs treatments
242608	'Podn'	Unique rhythmic genes in ELGs of NC treatment.	433752	Frg2f1	Unique rhythmic genes in ELGs of SiNPs treatment.	94066	Mrpl36	Unique rhythmic genes in ELGs of SD+SiNPs treatment.			Shared rhythmic genes in ELGs among NC, SiNPs, SD+SiNPs treatments
242819	'Rundc3b'	Unique rhythmic genes in ELGs of NC treatment.	433801	Gm13212	Unique rhythmic genes in ELGs of SiNPs treatment.	94216	Col4a6	Unique rhythmic genes in ELGs of SD+SiNPs treatment.			Shared rhythmic genes in ELGs among NC, SiNPs, SD+SiNPs treatments
243270	'Hcar1'	Unique rhythmic genes in ELGs of NC treatment.	434197	Fam169b	Unique rhythmic genes in ELGs of SiNPs treatment.	94232	Ubqln4	Unique rhythmic genes in ELGs of SD+SiNPs treatment.			Shared rhythmic genes in ELGs among NC, SiNPs, SD+SiNPs treatments
243308	'A430033K04Rik'	Unique rhythmic genes in ELGs of NC treatment.	434204	Whamm	Unique rhythmic genes in ELGs of SiNPs treatment.	96957	Tmem62	Unique rhythmic genes in ELGs of SD+SiNPs treatment.			Shared rhythmic genes in ELGs among NC, SiNPs, SD+SiNPs treatments
243385	'Gprin3'	Unique rhythmic genes in ELGs of NC treatment.	435145	Shisa8	Unique rhythmic genes in ELGs of SiNPs treatment.	96979	Ptges2	Unique rhythmic genes in ELGs of SD+SiNPs treatment.			Shared rhythmic genes in ELGs among NC, SiNPs, SD+SiNPs treatments
243574	'Kbtbd8'	Unique rhythmic genes in ELGs of NC treatment.	442801	Arhgef15	Unique rhythmic genes in ELGs of SiNPs treatment.	97212	Hadha	Unique rhythmic genes in ELGs of SD+SiNPs treatment.			Shared rhythmic genes in ELGs among NC, SiNPs, SD+SiNPs treatments
243813	'Leng9'	Unique rhythmic genes in ELGs of NC treatment.	494504	Apcdd1	Unique rhythmic genes in ELGs of SiNPs treatment.	97387	Strn4	Unique rhythmic genes in ELGs of SD+SiNPs treatment.			Shared rhythmic genes in ELGs among NC, SiNPs, SD+SiNPs treatments
244416	'Ppp1r3b'	Unique rhythmic genes in ELGs of NC treatment.	545391	Catspere2	Unique rhythmic genes in ELGs of SiNPs treatment.	97863	Fam8a1	Unique rhythmic genes in ELGs of SD+SiNPs treatment.			Shared rhythmic genes in ELGs among NC, SiNPs, SD+SiNPs treatments
244556	'Zfp791'	Unique rhythmic genes in ELGs of NC treatment.	545725	Mterf1a	Unique rhythmic genes in ELGs of SiNPs treatment.	97961	Nol12	Unique rhythmic genes in ELGs of SD+SiNPs treatment.			Shared rhythmic genes in ELGs among NC, SiNPs, SD+SiNPs treatments
244672	'Cwf19l2'	Unique rhythmic genes in ELGs of NC treatment.	546049	C330021F23Rik	Unique rhythmic genes in ELGs of SiNPs treatment.	98053	Gtf2f1	Unique rhythmic genes in ELGs of SD+SiNPs treatment.			Shared rhythmic genes in ELGs among NC, SiNPs, SD+SiNPs treatments
244871	'Zc3h12c'	Unique rhythmic genes in ELGs of NC treatment.	546061	LOC546061	Unique rhythmic genes in ELGs of SiNPs treatment.	98267	Stk17b	Unique rhythmic genes in ELGs of SD+SiNPs treatment.			Shared rhythmic genes in ELGs among NC, SiNPs, SD+SiNPs treatments
245555	'Nexmif'	Unique rhythmic genes in ELGs of NC treatment.	546643	Ly6a2	Unique rhythmic genes in ELGs of SiNPs treatment.	98388	Chst10	Unique rhythmic genes in ELGs of SD+SiNPs treatment.			Shared rhythmic genes in ELGs among NC, SiNPs, SD+SiNPs treatments
245857	'Ssh3'	Unique rhythmic genes in ELGs of NC treatment.	574418	Serinc4	Unique rhythmic genes in ELGs of SiNPs treatment.	98403	Zfp451	Unique rhythmic genes in ELGs of SD+SiNPs treatment.			Shared rhythmic genes in ELGs among NC, SiNPs, SD+SiNPs treatments
245860	'Atg9a'	Unique rhythmic genes in ELGs of NC treatment.	619310	Zfp872	Unique rhythmic genes in ELGs of SiNPs treatment.	98415	Nucks1	Unique rhythmic genes in ELGs of SD+SiNPs treatment.			Shared rhythmic genes in ELGs among NC, SiNPs, SD+SiNPs treatments
246277	'Csad'	Unique rhythmic genes in ELGs of NC treatment.	620592	Tmem28	Unique rhythmic genes in ELGs of SiNPs treatment.	98711	Rdh10	Unique rhythmic genes in ELGs of SD+SiNPs treatment.			Shared rhythmic genes in ELGs among NC, SiNPs, SD+SiNPs treatments
246710	'Rhobtb2'	Unique rhythmic genes in ELGs of NC treatment.	620807	Mup6	Unique rhythmic genes in ELGs of SiNPs treatment.	98733	Obsl1	Unique rhythmic genes in ELGs of SD+SiNPs treatment.			Shared rhythmic genes in ELGs among NC, SiNPs, SD+SiNPs treatments
252875	'Mios'	Unique rhythmic genes in ELGs of NC treatment.	622665	Ccdc17	Unique rhythmic genes in ELGs of SiNPs treatment.	98758	Hnrnpf	Unique rhythmic genes in ELGs of SD+SiNPs treatment.			Shared rhythmic genes in ELGs among NC, SiNPs, SD+SiNPs treatments
252973	'Grhl2'	Unique rhythmic genes in ELGs of NC treatment.	638345	Sbpl	Unique rhythmic genes in ELGs of SiNPs treatment.	98828	Cdc123	Unique rhythmic genes in ELGs of SD+SiNPs treatment.			Shared rhythmic genes in ELGs among NC, SiNPs, SD+SiNPs treatments
260409	'Cdc42ep3'	Unique rhythmic genes in ELGs of NC treatment.	641340	Nrbf2	Unique rhythmic genes in ELGs of SiNPs treatment.	98932	Myl9	Unique rhythmic genes in ELGs of SD+SiNPs treatment.			Shared rhythmic genes in ELGs among NC, SiNPs, SD+SiNPs treatments
268451	'Rab11fip4'	Unique rhythmic genes in ELGs of NC treatment.	654824	Ankrd37	Unique rhythmic genes in ELGs of SiNPs treatment.	98956	Nat10	Unique rhythmic genes in ELGs of SD+SiNPs treatment.			Shared rhythmic genes in ELGs among NC, SiNPs, SD+SiNPs treatments
268512	'Slc26a11'	Unique rhythmic genes in ELGs of NC treatment.	666244	Tmsb15b1	Unique rhythmic genes in ELGs of SiNPs treatment.	99167	Ssx2ip	Unique rhythmic genes in ELGs of SD+SiNPs treatment.			Shared rhythmic genes in ELGs among NC, SiNPs, SD+SiNPs treatments
268706	'Slc38a9'	Unique rhythmic genes in ELGs of NC treatment.	666794	Rbm24	Unique rhythmic genes in ELGs of SiNPs treatment.	99349	Dnajc24	Unique rhythmic genes in ELGs of SD+SiNPs treatment.			Shared rhythmic genes in ELGs among NC, SiNPs, SD+SiNPs treatments
268903	'Nrip1'	Unique rhythmic genes in ELGs of NC treatment.	667977	Gm8909	Unique rhythmic genes in ELGs of SiNPs treatment.	99375	Cul4a	Unique rhythmic genes in ELGs of SD+SiNPs treatment.			Shared rhythmic genes in ELGs among NC, SiNPs, SD+SiNPs treatments
269338	'Vps39'	Unique rhythmic genes in ELGs of NC treatment.	668225	Fignl2	Unique rhythmic genes in ELGs of SiNPs treatment.	99526	Usp53	Unique rhythmic genes in ELGs of SD+SiNPs treatment.			Shared rhythmic genes in ELGs among NC, SiNPs, SD+SiNPs treatments
269423	'Abhd18'	Unique rhythmic genes in ELGs of NC treatment.	671535	Parp10	Unique rhythmic genes in ELGs of SiNPs treatment.	99633	Adgrl2	Unique rhythmic genes in ELGs of SD+SiNPs treatment.			Shared rhythmic genes in ELGs among NC, SiNPs, SD+SiNPs treatments
269536	'Tex10'	Unique rhythmic genes in ELGs of NC treatment.	100038347	Fam174b	Unique rhythmic genes in ELGs of SiNPs treatment.	99696	Ankrd50	Unique rhythmic genes in ELGs of SD+SiNPs treatment.			Shared rhythmic genes in ELGs among NC, SiNPs, SD+SiNPs treatments
269878	'Megf8'	Unique rhythmic genes in ELGs of NC treatment.	100039029	LOC100039029	Unique rhythmic genes in ELGs of SiNPs treatment.	100226	Stx12	Unique rhythmic genes in ELGs of SD+SiNPs treatment.			Shared rhythmic genes in ELGs among NC, SiNPs, SD+SiNPs treatments
277250	'Kdm3b'	Unique rhythmic genes in ELGs of NC treatment.	100039293	Duxbl3	Unique rhythmic genes in ELGs of SiNPs treatment.	100465	Mob3c	Unique rhythmic genes in ELGs of SD+SiNPs treatment.			Shared rhythmic genes in ELGs among NC, SiNPs, SD+SiNPs treatments
277360	'Prex1'	Unique rhythmic genes in ELGs of NC treatment.	100039815	Gm2436	Unique rhythmic genes in ELGs of SiNPs treatment.	100972	Rab28	Unique rhythmic genes in ELGs of SD+SiNPs treatment.			Shared rhythmic genes in ELGs among NC, SiNPs, SD+SiNPs treatments
278240	'Spin2c'	Unique rhythmic genes in ELGs of NC treatment.	100039830	Gm2446	Unique rhythmic genes in ELGs of SiNPs treatment.	101185	Pot1a	Unique rhythmic genes in ELGs of SD+SiNPs treatment.			Shared rhythmic genes in ELGs among NC, SiNPs, SD+SiNPs treatments
280408	'Rilp'	Unique rhythmic genes in ELGs of NC treatment.	100040563	Dynlt1c	Unique rhythmic genes in ELGs of SiNPs treatment.	101488	Slco2b1	Unique rhythmic genes in ELGs of SD+SiNPs treatment.			Shared rhythmic genes in ELGs among NC, SiNPs, SD+SiNPs treatments
317758	'Gimap9'	Unique rhythmic genes in ELGs of NC treatment.	100041420	Gm3325	Unique rhythmic genes in ELGs of SiNPs treatment.	101739	Psip1	Unique rhythmic genes in ELGs of SD+SiNPs treatment.			Shared rhythmic genes in ELGs among NC, SiNPs, SD+SiNPs treatments
319156	'H4c4'	Unique rhythmic genes in ELGs of NC treatment.	100041586	Gm3417	Unique rhythmic genes in ELGs of SiNPs treatment.	102141	Snx25	Unique rhythmic genes in ELGs of SD+SiNPs treatment.			Shared rhythmic genes in ELGs among NC, SiNPs, SD+SiNPs treatments
319158	'H4c9'	Unique rhythmic genes in ELGs of NC treatment.	100041708	LOC100041708	Unique rhythmic genes in ELGs of SiNPs treatment.	102294	Cyp4v3	Unique rhythmic genes in ELGs of SD+SiNPs treatment.			Shared rhythmic genes in ELGs among NC, SiNPs, SD+SiNPs treatments
319159	'H4c11'	Unique rhythmic genes in ELGs of NC treatment.	100041953	Sap18b	Unique rhythmic genes in ELGs of SiNPs treatment.	102566	Ano10	Unique rhythmic genes in ELGs of SD+SiNPs treatment.			Shared rhythmic genes in ELGs among NC, SiNPs, SD+SiNPs treatments
319161	'Hist1h4n'	Unique rhythmic genes in ELGs of NC treatment.	100042074	Gm3650	Unique rhythmic genes in ELGs of SiNPs treatment.	103142	Rdh9	Unique rhythmic genes in ELGs of SD+SiNPs treatment.			Shared rhythmic genes in ELGs among NC, SiNPs, SD+SiNPs treatments
319178	'H2bc3'	Unique rhythmic genes in ELGs of NC treatment.	100042150	Nrg2	Unique rhythmic genes in ELGs of SiNPs treatment.	103284	Zc3h10	Unique rhythmic genes in ELGs of SD+SiNPs treatment.			Shared rhythmic genes in ELGs among NC, SiNPs, SD+SiNPs treatments
319740	'Zfyve27'	Unique rhythmic genes in ELGs of NC treatment.	100043300	Esp16	Unique rhythmic genes in ELGs of SiNPs treatment.	103554	Psme4	Unique rhythmic genes in ELGs of SD+SiNPs treatment.			Shared rhythmic genes in ELGs among NC, SiNPs, SD+SiNPs treatments
319758	'Rfx7'	Unique rhythmic genes in ELGs of NC treatment.	100043314	Tigit	Unique rhythmic genes in ELGs of SiNPs treatment.	103677	Smg6	Unique rhythmic genes in ELGs of SD+SiNPs treatment.			Shared rhythmic genes in ELGs among NC, SiNPs, SD+SiNPs treatments
319817	'Rc3h2'	Unique rhythmic genes in ELGs of NC treatment.	100126776	Esp24	Unique rhythmic genes in ELGs of SiNPs treatment.	103836	Zfp692	Unique rhythmic genes in ELGs of SD+SiNPs treatment.			Shared rhythmic genes in ELGs among NC, SiNPs, SD+SiNPs treatments
319845	'Bbs9'	Unique rhythmic genes in ELGs of NC treatment.	100216474	Ttll2	Unique rhythmic genes in ELGs of SiNPs treatment.	104027	Synpo	Unique rhythmic genes in ELGs of SD+SiNPs treatment.			Shared rhythmic genes in ELGs among NC, SiNPs, SD+SiNPs treatments
319876	'Cobll1'	Unique rhythmic genes in ELGs of NC treatment.	100502766	Kifc1	Unique rhythmic genes in ELGs of SiNPs treatment.	104082	Wdr7	Unique rhythmic genes in ELGs of SD+SiNPs treatment.			Shared rhythmic genes in ELGs among NC, SiNPs, SD+SiNPs treatments
319934	'Sbf2'	Unique rhythmic genes in ELGs of NC treatment.	100502861	Ccdc13	Unique rhythmic genes in ELGs of SiNPs treatment.	104110	Adcy4	Unique rhythmic genes in ELGs of SD+SiNPs treatment.			Shared rhythmic genes in ELGs among NC, SiNPs, SD+SiNPs treatments
319974	'Auts2'	Unique rhythmic genes in ELGs of NC treatment.	100504285	Abhd12b	Unique rhythmic genes in ELGs of SiNPs treatment.	104112	Acly	Unique rhythmic genes in ELGs of SD+SiNPs treatment.			Shared rhythmic genes in ELGs among NC, SiNPs, SD+SiNPs treatments
319984	'Jph4'	Unique rhythmic genes in ELGs of NC treatment.	100504446	Prr22	Unique rhythmic genes in ELGs of SiNPs treatment.	104394	E2f4	Unique rhythmic genes in ELGs of SD+SiNPs treatment.			Shared rhythmic genes in ELGs among NC, SiNPs, SD+SiNPs treatments
320024	'Nceh1'	Unique rhythmic genes in ELGs of NC treatment.	102632555	Gm12873	Unique rhythmic genes in ELGs of SiNPs treatment.	104416	Bap1	Unique rhythmic genes in ELGs of SD+SiNPs treatment.			Shared rhythmic genes in ELGs among NC, SiNPs, SD+SiNPs treatments
320165	'Tacc1'	Unique rhythmic genes in ELGs of NC treatment.	102633345	Gm9922	Unique rhythmic genes in ELGs of SiNPs treatment.	104776	Aldh6a1	Unique rhythmic genes in ELGs of SD+SiNPs treatment.			Shared rhythmic genes in ELGs among NC, SiNPs, SD+SiNPs treatments
320209	'Ddx11'	Unique rhythmic genes in ELGs of NC treatment.	102633888	Gm31606	Unique rhythmic genes in ELGs of SiNPs treatment.	104806	Fancm	Unique rhythmic genes in ELGs of SD+SiNPs treatment.			Shared rhythmic genes in ELGs among NC, SiNPs, SD+SiNPs treatments
320709	'Tmem117'	Unique rhythmic genes in ELGs of NC treatment.	102634072	Gm38457	Unique rhythmic genes in ELGs of SiNPs treatment.	105005	Lratd1	Unique rhythmic genes in ELGs of SD+SiNPs treatment.			Shared rhythmic genes in ELGs among NC, SiNPs, SD+SiNPs treatments
320951	'Pisd'	Unique rhythmic genes in ELGs of NC treatment.	102634941	Gm29376	Unique rhythmic genes in ELGs of SiNPs treatment.	105348	Golm1	Unique rhythmic genes in ELGs of SD+SiNPs treatment.			Shared rhythmic genes in ELGs among NC, SiNPs, SD+SiNPs treatments
320961	'A630026N12Rik'	Unique rhythmic genes in ELGs of NC treatment.	102635552	Gm32856	Unique rhythmic genes in ELGs of SiNPs treatment.	105372	Utp15	Unique rhythmic genes in ELGs of SD+SiNPs treatment.			Shared rhythmic genes in ELGs among NC, SiNPs, SD+SiNPs treatments
327762	'Dna2'	Unique rhythmic genes in ELGs of NC treatment.	102637163	Scgb1b15	Unique rhythmic genes in ELGs of SiNPs treatment.	105428	Fam149b	Unique rhythmic genes in ELGs of SD+SiNPs treatment.			Shared rhythmic genes in ELGs among NC, SiNPs, SD+SiNPs treatments
328092	'Dtd2'	Unique rhythmic genes in ELGs of NC treatment.	102637615	Scgb1b17	Unique rhythmic genes in ELGs of SiNPs treatment.	105504	Exoc5	Unique rhythmic genes in ELGs of SD+SiNPs treatment.			Shared rhythmic genes in ELGs among NC, SiNPs, SD+SiNPs treatments
328329	'Mast4'	Unique rhythmic genes in ELGs of NC treatment.	102639543	Ifi206	Unique rhythmic genes in ELGs of SiNPs treatment.	105522	Ankrd28	Unique rhythmic genes in ELGs of SD+SiNPs treatment.			Shared rhythmic genes in ELGs among NC, SiNPs, SD+SiNPs treatments
328330	'D130037M23Rik'	Unique rhythmic genes in ELGs of NC treatment.	102639700	LOC102639700	Unique rhythmic genes in ELGs of SiNPs treatment.	106021	Topors	Unique rhythmic genes in ELGs of SD+SiNPs treatment.			Shared rhythmic genes in ELGs among NC, SiNPs, SD+SiNPs treatments
328365	'Zmiz1'	Unique rhythmic genes in ELGs of NC treatment.	105244150	LOC105244150	Unique rhythmic genes in ELGs of SiNPs treatment.	106064	AW549877	Unique rhythmic genes in ELGs of SD+SiNPs treatment.			Shared rhythmic genes in ELGs among NC, SiNPs, SD+SiNPs treatments
328370	'Rft1'	Unique rhythmic genes in ELGs of NC treatment.	105244829	Gm40365	Unique rhythmic genes in ELGs of SiNPs treatment.	106068	Slc45a4	Unique rhythmic genes in ELGs of SD+SiNPs treatment.			Shared rhythmic genes in ELGs among NC, SiNPs, SD+SiNPs treatments
328440	'Npm2'	Unique rhythmic genes in ELGs of NC treatment.	105245383	Gm40848	Unique rhythmic genes in ELGs of SiNPs treatment.	106200	Txndc11	Unique rhythmic genes in ELGs of SD+SiNPs treatment.			Shared rhythmic genes in ELGs among NC, SiNPs, SD+SiNPs treatments
328801	'Zfp414'	Unique rhythmic genes in ELGs of NC treatment.	105245580	A930018O16Rik	Unique rhythmic genes in ELGs of SiNPs treatment.	106489	Sft2d1	Unique rhythmic genes in ELGs of SD+SiNPs treatment.			Shared rhythmic genes in ELGs among NC, SiNPs, SD+SiNPs treatments
328918	'Zscan30'	Unique rhythmic genes in ELGs of NC treatment.	105246825	Gm42049	Unique rhythmic genes in ELGs of SiNPs treatment.	106628	Trip10	Unique rhythmic genes in ELGs of SD+SiNPs treatment.			Shared rhythmic genes in ELGs among NC, SiNPs, SD+SiNPs treatments
328967	'Arhgef37'	Unique rhythmic genes in ELGs of NC treatment.	108167572	LOC108167572	Unique rhythmic genes in ELGs of SiNPs treatment.	106795	Tcf19	Unique rhythmic genes in ELGs of SD+SiNPs treatment.			Shared rhythmic genes in ELGs among NC, SiNPs, SD+SiNPs treatments
329260	'Dennd1b'	Unique rhythmic genes in ELGs of NC treatment.	108167886	Gm46272	Unique rhythmic genes in ELGs of SiNPs treatment.	106877	Afap1l1	Unique rhythmic genes in ELGs of SD+SiNPs treatment.			Shared rhythmic genes in ELGs among NC, SiNPs, SD+SiNPs treatments
329702	'Dcst2'	Unique rhythmic genes in ELGs of NC treatment.	108168499	Gm46696	Unique rhythmic genes in ELGs of SiNPs treatment.	107022	Gramd3	Unique rhythmic genes in ELGs of SD+SiNPs treatment.			Shared rhythmic genes in ELGs among NC, SiNPs, SD+SiNPs treatments
330189	'Tmem120b'	Unique rhythmic genes in ELGs of NC treatment.	115485924	LOC115485924	Unique rhythmic genes in ELGs of SiNPs treatment.	107435	Hat1	Unique rhythmic genes in ELGs of SD+SiNPs treatment.			Shared rhythmic genes in ELGs among NC, SiNPs, SD+SiNPs treatments
330217	'Gal3st4'	Unique rhythmic genes in ELGs of NC treatment.	115487203	LOC115487203	Unique rhythmic genes in ELGs of SiNPs treatment.	107448	Unc5a	Unique rhythmic genes in ELGs of SD+SiNPs treatment.			Shared rhythmic genes in ELGs among NC, SiNPs, SD+SiNPs treatments
330463	'Zfp78'	Unique rhythmic genes in ELGs of NC treatment.	115489125	LOC115489125	Unique rhythmic genes in ELGs of SiNPs treatment.	107449	Unc5b	Unique rhythmic genes in ELGs of SD+SiNPs treatment.			Shared rhythmic genes in ELGs among NC, SiNPs, SD+SiNPs treatments
330914	'Arhgap32'	Unique rhythmic genes in ELGs of NC treatment.	115489690	LOC115489690	Unique rhythmic genes in ELGs of SiNPs treatment.	107528	Magee1	Unique rhythmic genes in ELGs of SD+SiNPs treatment.			Shared rhythmic genes in ELGs among NC, SiNPs, SD+SiNPs treatments
333193	'Proser3'	Unique rhythmic genes in ELGs of NC treatment.	115490161	LOC115490161	Unique rhythmic genes in ELGs of SiNPs treatment.	107569	Nt5c3	Unique rhythmic genes in ELGs of SD+SiNPs treatment.			Shared rhythmic genes in ELGs among NC, SiNPs, SD+SiNPs treatments
338354	'Zfp780b'	Unique rhythmic genes in ELGs of NC treatment.			Unique rhythmic genes in ELGs of SiNPs treatment.	107702	Rnh1	Unique rhythmic genes in ELGs of SD+SiNPs treatment.			Shared rhythmic genes in ELGs among NC, SiNPs, SD+SiNPs treatments
338355	'Fkbp15'	Unique rhythmic genes in ELGs of NC treatment.			Unique rhythmic genes in ELGs of SiNPs treatment.	107734	Mrpl30	Unique rhythmic genes in ELGs of SD+SiNPs treatment.			Shared rhythmic genes in ELGs among NC, SiNPs, SD+SiNPs treatments
338359	'Supv3l1'	Unique rhythmic genes in ELGs of NC treatment.			Unique rhythmic genes in ELGs of SiNPs treatment.	107746	Rapgef1	Unique rhythmic genes in ELGs of SD+SiNPs treatment.			Shared rhythmic genes in ELGs among NC, SiNPs, SD+SiNPs treatments
338363	'Tmem241'	Unique rhythmic genes in ELGs of NC treatment.			Unique rhythmic genes in ELGs of SiNPs treatment.	107767	Scamp1	Unique rhythmic genes in ELGs of SD+SiNPs treatment.			Shared rhythmic genes in ELGs among NC, SiNPs, SD+SiNPs treatments
338367	'Myo1d'	Unique rhythmic genes in ELGs of NC treatment.			Unique rhythmic genes in ELGs of SiNPs treatment.	108143	Taf9	Unique rhythmic genes in ELGs of SD+SiNPs treatment.			Shared rhythmic genes in ELGs among NC, SiNPs, SD+SiNPs treatments
338467	'Morc3'	Unique rhythmic genes in ELGs of NC treatment.			Unique rhythmic genes in ELGs of SiNPs treatment.	108156	Mthfd1	Unique rhythmic genes in ELGs of SD+SiNPs treatment.			Shared rhythmic genes in ELGs among NC, SiNPs, SD+SiNPs treatments
380614	'Intu'	Unique rhythmic genes in ELGs of NC treatment.			Unique rhythmic genes in ELGs of SiNPs treatment.	108654	Fam210a	Unique rhythmic genes in ELGs of SD+SiNPs treatment.			Shared rhythmic genes in ELGs among NC, SiNPs, SD+SiNPs treatments
381104	'Prickle4'	Unique rhythmic genes in ELGs of NC treatment.			Unique rhythmic genes in ELGs of SiNPs treatment.	108664	Atp6v1h	Unique rhythmic genes in ELGs of SD+SiNPs treatment.			Shared rhythmic genes in ELGs among NC, SiNPs, SD+SiNPs treatments
381236	'Lipo3'	Unique rhythmic genes in ELGs of NC treatment.			Unique rhythmic genes in ELGs of SiNPs treatment.	108670	Epsti1	Unique rhythmic genes in ELGs of SD+SiNPs treatment.			Shared rhythmic genes in ELGs among NC, SiNPs, SD+SiNPs treatments
381287	'A530032D15Rik'	Unique rhythmic genes in ELGs of NC treatment.			Unique rhythmic genes in ELGs of SiNPs treatment.	108679	Cops8	Unique rhythmic genes in ELGs of SD+SiNPs treatment.			Shared rhythmic genes in ELGs among NC, SiNPs, SD+SiNPs treatments
381438	'Gm5148'	Unique rhythmic genes in ELGs of NC treatment.			Unique rhythmic genes in ELGs of SiNPs treatment.	108705	Pttg1ip	Unique rhythmic genes in ELGs of SD+SiNPs treatment.			Shared rhythmic genes in ELGs among NC, SiNPs, SD+SiNPs treatments
381580	'Ccdc27'	Unique rhythmic genes in ELGs of NC treatment.			Unique rhythmic genes in ELGs of SiNPs treatment.	108723	Card11	Unique rhythmic genes in ELGs of SD+SiNPs treatment.			Shared rhythmic genes in ELGs among NC, SiNPs, SD+SiNPs treatments
381626	'Rbm33'	Unique rhythmic genes in ELGs of NC treatment.			Unique rhythmic genes in ELGs of SiNPs treatment.	108899	2700081O15Rik	Unique rhythmic genes in ELGs of SD+SiNPs treatment.			Shared rhythmic genes in ELGs among NC, SiNPs, SD+SiNPs treatments
381694	'B3glct'	Unique rhythmic genes in ELGs of NC treatment.			Unique rhythmic genes in ELGs of SiNPs treatment.	108954	Ppp1r15b	Unique rhythmic genes in ELGs of SD+SiNPs treatment.			Shared rhythmic genes in ELGs among NC, SiNPs, SD+SiNPs treatments
381812	'Cracr2a'	Unique rhythmic genes in ELGs of NC treatment.			Unique rhythmic genes in ELGs of SiNPs treatment.	109079	Sephs1	Unique rhythmic genes in ELGs of SD+SiNPs treatment.			Shared rhythmic genes in ELGs among NC, SiNPs, SD+SiNPs treatments
382010	'Cep44'	Unique rhythmic genes in ELGs of NC treatment.			Unique rhythmic genes in ELGs of SiNPs treatment.	109145	Gins4	Unique rhythmic genes in ELGs of SD+SiNPs treatment.			Shared rhythmic genes in ELGs among NC, SiNPs, SD+SiNPs treatments
382051	'Pdp2'	Unique rhythmic genes in ELGs of NC treatment.			Unique rhythmic genes in ELGs of SiNPs treatment.	109169	Igip	Unique rhythmic genes in ELGs of SD+SiNPs treatment.			Shared rhythmic genes in ELGs among NC, SiNPs, SD+SiNPs treatments
384763	'Zfp667'	Unique rhythmic genes in ELGs of NC treatment.			Unique rhythmic genes in ELGs of SiNPs treatment.	109245	Lrrc39	Unique rhythmic genes in ELGs of SD+SiNPs treatment.			Shared rhythmic genes in ELGs among NC, SiNPs, SD+SiNPs treatments
385674	'Zfp174'	Unique rhythmic genes in ELGs of NC treatment.			Unique rhythmic genes in ELGs of SiNPs treatment.	109263	Rlf	Unique rhythmic genes in ELGs of SD+SiNPs treatment.			Shared rhythmic genes in ELGs among NC, SiNPs, SD+SiNPs treatments
403178	'Plcxd1'	Unique rhythmic genes in ELGs of NC treatment.			Unique rhythmic genes in ELGs of SiNPs treatment.	109637	Upk1a	Unique rhythmic genes in ELGs of SD+SiNPs treatment.			Shared rhythmic genes in ELGs among NC, SiNPs, SD+SiNPs treatments
404319	'Olfr750'	Unique rhythmic genes in ELGs of NC treatment.			Unique rhythmic genes in ELGs of SiNPs treatment.	109754	Cyb5r3	Unique rhythmic genes in ELGs of SD+SiNPs treatment.			Shared rhythmic genes in ELGs among NC, SiNPs, SD+SiNPs treatments
407786	'Taf9b'	Unique rhythmic genes in ELGs of NC treatment.			Unique rhythmic genes in ELGs of SiNPs treatment.	109815	Selenos	Unique rhythmic genes in ELGs of SD+SiNPs treatment.			Shared rhythmic genes in ELGs among NC, SiNPs, SD+SiNPs treatments
407821	'Znrf3'	Unique rhythmic genes in ELGs of NC treatment.			Unique rhythmic genes in ELGs of SiNPs treatment.	109880	Braf	Unique rhythmic genes in ELGs of SD+SiNPs treatment.			Shared rhythmic genes in ELGs among NC, SiNPs, SD+SiNPs treatments
407823	'Baz2b'	Unique rhythmic genes in ELGs of NC treatment.			Unique rhythmic genes in ELGs of SiNPs treatment.	109905	Rap1a	Unique rhythmic genes in ELGs of SD+SiNPs treatment.			Shared rhythmic genes in ELGs among NC, SiNPs, SD+SiNPs treatments
414089	'Gja6'	Unique rhythmic genes in ELGs of NC treatment.			Unique rhythmic genes in ELGs of SiNPs treatment.	109910	Zfp91	Unique rhythmic genes in ELGs of SD+SiNPs treatment.			Shared rhythmic genes in ELGs among NC, SiNPs, SD+SiNPs treatments
433107	'Esp6'	Unique rhythmic genes in ELGs of NC treatment.			Unique rhythmic genes in ELGs of SiNPs treatment.	110052	Dek	Unique rhythmic genes in ELGs of SD+SiNPs treatment.			Shared rhythmic genes in ELGs among NC, SiNPs, SD+SiNPs treatments
433791	'Zfp992'	Unique rhythmic genes in ELGs of NC treatment.			Unique rhythmic genes in ELGs of SiNPs treatment.	110119	Mpi	Unique rhythmic genes in ELGs of SD+SiNPs treatment.			Shared rhythmic genes in ELGs among NC, SiNPs, SD+SiNPs treatments
434008	'Tmem178b'	Unique rhythmic genes in ELGs of NC treatment.			Unique rhythmic genes in ELGs of SiNPs treatment.	110213	Tmbim6	Unique rhythmic genes in ELGs of SD+SiNPs treatment.			Shared rhythmic genes in ELGs among NC, SiNPs, SD+SiNPs treatments
434233	'Ppp1ccb'	Unique rhythmic genes in ELGs of NC treatment.			Unique rhythmic genes in ELGs of SiNPs treatment.	110351	Rap1gap	Unique rhythmic genes in ELGs of SD+SiNPs treatment.			Shared rhythmic genes in ELGs among NC, SiNPs, SD+SiNPs treatments
435927	'Gm5724'	Unique rhythmic genes in ELGs of NC treatment.			Unique rhythmic genes in ELGs of SiNPs treatment.	110446	Acat1	Unique rhythmic genes in ELGs of SD+SiNPs treatment.			Shared rhythmic genes in ELGs among NC, SiNPs, SD+SiNPs treatments
494468	'Armcx5'	Unique rhythmic genes in ELGs of NC treatment.			Unique rhythmic genes in ELGs of SiNPs treatment.	110460	Acat2	Unique rhythmic genes in ELGs of SD+SiNPs treatment.			Shared rhythmic genes in ELGs among NC, SiNPs, SD+SiNPs treatments
546611	'Klhl33'	Unique rhythmic genes in ELGs of NC treatment.			Unique rhythmic genes in ELGs of SiNPs treatment.	110749	Chaf1b	Unique rhythmic genes in ELGs of SD+SiNPs treatment.			Shared rhythmic genes in ELGs among NC, SiNPs, SD+SiNPs treatments
574405	'DXBay18'	Unique rhythmic genes in ELGs of NC treatment.			Unique rhythmic genes in ELGs of SiNPs treatment.	110809	Srsf1	Unique rhythmic genes in ELGs of SD+SiNPs treatment.			Shared rhythmic genes in ELGs among NC, SiNPs, SD+SiNPs treatments
621080	'AI429214'	Unique rhythmic genes in ELGs of NC treatment.			Unique rhythmic genes in ELGs of SiNPs treatment.	110821	Pcca	Unique rhythmic genes in ELGs of SD+SiNPs treatment.			Shared rhythmic genes in ELGs among NC, SiNPs, SD+SiNPs treatments
621823	'Psme2b'	Unique rhythmic genes in ELGs of NC treatment.			Unique rhythmic genes in ELGs of SiNPs treatment.	112406	Egln2	Unique rhythmic genes in ELGs of SD+SiNPs treatment.			Shared rhythmic genes in ELGs among NC, SiNPs, SD+SiNPs treatments
622320	'Kctd21'	Unique rhythmic genes in ELGs of NC treatment.			Unique rhythmic genes in ELGs of SiNPs treatment.	114664	Hsd17b11	Unique rhythmic genes in ELGs of SD+SiNPs treatment.			Shared rhythmic genes in ELGs among NC, SiNPs, SD+SiNPs treatments
622554	'Majin'	Unique rhythmic genes in ELGs of NC treatment.			Unique rhythmic genes in ELGs of SiNPs treatment.	114713	Rasa2	Unique rhythmic genes in ELGs of SD+SiNPs treatment.			Shared rhythmic genes in ELGs among NC, SiNPs, SD+SiNPs treatments
623230	'Tmem200b'	Unique rhythmic genes in ELGs of NC treatment.			Unique rhythmic genes in ELGs of SiNPs treatment.	114715	Spred1	Unique rhythmic genes in ELGs of SD+SiNPs treatment.			Shared rhythmic genes in ELGs among NC, SiNPs, SD+SiNPs treatments
626359	'Wdr93'	Unique rhythmic genes in ELGs of NC treatment.			Unique rhythmic genes in ELGs of SiNPs treatment.	114716	Spred2	Unique rhythmic genes in ELGs of SD+SiNPs treatment.			Shared rhythmic genes in ELGs among NC, SiNPs, SD+SiNPs treatments
626415	'4930467E23Rik'	Unique rhythmic genes in ELGs of NC treatment.			Unique rhythmic genes in ELGs of SiNPs treatment.	114774	Pawr	Unique rhythmic genes in ELGs of SD+SiNPs treatment.			Shared rhythmic genes in ELGs among NC, SiNPs, SD+SiNPs treatments
628991	'Obp1b'	Unique rhythmic genes in ELGs of NC treatment.			Unique rhythmic genes in ELGs of SiNPs treatment.	117150	Pip4k2c	Unique rhythmic genes in ELGs of SD+SiNPs treatment.			Shared rhythmic genes in ELGs among NC, SiNPs, SD+SiNPs treatments
630579	'Zfp808'	Unique rhythmic genes in ELGs of NC treatment.			Unique rhythmic genes in ELGs of SiNPs treatment.	117167	Steap4	Unique rhythmic genes in ELGs of SD+SiNPs treatment.			Shared rhythmic genes in ELGs among NC, SiNPs, SD+SiNPs treatments
630836	'2010315B03Rik'	Unique rhythmic genes in ELGs of NC treatment.			Unique rhythmic genes in ELGs of SiNPs treatment.	140482	Zfp358	Unique rhythmic genes in ELGs of SD+SiNPs treatment.			Shared rhythmic genes in ELGs among NC, SiNPs, SD+SiNPs treatments
637515	'Nlrp1b'	Unique rhythmic genes in ELGs of NC treatment.			Unique rhythmic genes in ELGs of SiNPs treatment.	140859	Nek8	Unique rhythmic genes in ELGs of SD+SiNPs treatment.			Shared rhythmic genes in ELGs among NC, SiNPs, SD+SiNPs treatments
654801	'Zfp784'	Unique rhythmic genes in ELGs of NC treatment.			Unique rhythmic genes in ELGs of SiNPs treatment.	170460	Stard5	Unique rhythmic genes in ELGs of SD+SiNPs treatment.			Shared rhythmic genes in ELGs among NC, SiNPs, SD+SiNPs treatments
666532	'Zfp991'	Unique rhythmic genes in ELGs of NC treatment.			Unique rhythmic genes in ELGs of SiNPs treatment.	170719	Oxr1	Unique rhythmic genes in ELGs of SD+SiNPs treatment.			Shared rhythmic genes in ELGs among NC, SiNPs, SD+SiNPs treatments
100039192	'Tmem254c'	Unique rhythmic genes in ELGs of NC treatment.			Unique rhythmic genes in ELGs of SiNPs treatment.	170721	Papln	Unique rhythmic genes in ELGs of SD+SiNPs treatment.			Shared rhythmic genes in ELGs among NC, SiNPs, SD+SiNPs treatments
100039227	'Duxbl2'	Unique rhythmic genes in ELGs of NC treatment.			Unique rhythmic genes in ELGs of SiNPs treatment.	170736	Parvb	Unique rhythmic genes in ELGs of SD+SiNPs treatment.			Shared rhythmic genes in ELGs among NC, SiNPs, SD+SiNPs treatments
100041677	'Zfp984'	Unique rhythmic genes in ELGs of NC treatment.			Unique rhythmic genes in ELGs of SiNPs treatment.	170768	Pfkfb3	Unique rhythmic genes in ELGs of SD+SiNPs treatment.			Shared rhythmic genes in ELGs among NC, SiNPs, SD+SiNPs treatments
100041734	'4930522L14Rik'	Unique rhythmic genes in ELGs of NC treatment.			Unique rhythmic genes in ELGs of SiNPs treatment.	170835	Inpp5j	Unique rhythmic genes in ELGs of SD+SiNPs treatment.			Shared rhythmic genes in ELGs among NC, SiNPs, SD+SiNPs treatments
100043827	'Scgb2b1'	Unique rhythmic genes in ELGs of NC treatment.			Unique rhythmic genes in ELGs of SiNPs treatment.	171531	Mlph	Unique rhythmic genes in ELGs of SD+SiNPs treatment.			Shared rhythmic genes in ELGs among NC, SiNPs, SD+SiNPs treatments
100126777	'Esp4'	Unique rhythmic genes in ELGs of NC treatment.			Unique rhythmic genes in ELGs of SiNPs treatment.	171567	Nme7	Unique rhythmic genes in ELGs of SD+SiNPs treatment.			Shared rhythmic genes in ELGs among NC, SiNPs, SD+SiNPs treatments
100503584	'Zfp534'	Unique rhythmic genes in ELGs of NC treatment.			Unique rhythmic genes in ELGs of SiNPs treatment.	192185	Nadk	Unique rhythmic genes in ELGs of SD+SiNPs treatment.			Shared rhythmic genes in ELGs among NC, SiNPs, SD+SiNPs treatments
100504715	'Tmppe'	Unique rhythmic genes in ELGs of NC treatment.			Unique rhythmic genes in ELGs of SiNPs treatment.	192289	Tmlhe	Unique rhythmic genes in ELGs of SD+SiNPs treatment.			Shared rhythmic genes in ELGs among NC, SiNPs, SD+SiNPs treatments
102632102	'LOC102632102'	Unique rhythmic genes in ELGs of NC treatment.			Unique rhythmic genes in ELGs of SiNPs treatment.	192678	Rassf3	Unique rhythmic genes in ELGs of SD+SiNPs treatment.			Shared rhythmic genes in ELGs among NC, SiNPs, SD+SiNPs treatments
102633763	'Gm31513'	Unique rhythmic genes in ELGs of NC treatment.			Unique rhythmic genes in ELGs of SiNPs treatment.	193742	Abhd16a	Unique rhythmic genes in ELGs of SD+SiNPs treatment.			Shared rhythmic genes in ELGs among NC, SiNPs, SD+SiNPs treatments
102639105	'Gm35498'	Unique rhythmic genes in ELGs of NC treatment.			Unique rhythmic genes in ELGs of SiNPs treatment.	193838	Eme2	Unique rhythmic genes in ELGs of SD+SiNPs treatment.			Shared rhythmic genes in ELGs among NC, SiNPs, SD+SiNPs treatments
105244006	'Gm39701'	Unique rhythmic genes in ELGs of NC treatment.			Unique rhythmic genes in ELGs of SiNPs treatment.	207304	Hectd1	Unique rhythmic genes in ELGs of SD+SiNPs treatment.			Shared rhythmic genes in ELGs among NC, SiNPs, SD+SiNPs treatments
105244343	'Gm39972'	Unique rhythmic genes in ELGs of NC treatment.			Unique rhythmic genes in ELGs of SiNPs treatment.	207806	Usf3	Unique rhythmic genes in ELGs of SD+SiNPs treatment.			Shared rhythmic genes in ELGs among NC, SiNPs, SD+SiNPs treatments
105244831	'Gm40367'	Unique rhythmic genes in ELGs of NC treatment.			Unique rhythmic genes in ELGs of SiNPs treatment.	207818	Smagp	Unique rhythmic genes in ELGs of SD+SiNPs treatment.			Shared rhythmic genes in ELGs among NC, SiNPs, SD+SiNPs treatments
105247234	'Gm42368'	Unique rhythmic genes in ELGs of NC treatment.			Unique rhythmic genes in ELGs of SiNPs treatment.	208194	Exog	Unique rhythmic genes in ELGs of SD+SiNPs treatment.			Shared rhythmic genes in ELGs among NC, SiNPs, SD+SiNPs treatments
108167440	'LOC108167440'	Unique rhythmic genes in ELGs of NC treatment.			Unique rhythmic genes in ELGs of SiNPs treatment.	208440	Dip2c	Unique rhythmic genes in ELGs of SD+SiNPs treatment.			Shared rhythmic genes in ELGs among NC, SiNPs, SD+SiNPs treatments
108167848	'Gm12258'	Unique rhythmic genes in ELGs of NC treatment.			Unique rhythmic genes in ELGs of SiNPs treatment.	208836	Fanci	Unique rhythmic genes in ELGs of SD+SiNPs treatment.			Shared rhythmic genes in ELGs among NC, SiNPs, SD+SiNPs treatments
108168101	'Gm46430'	Unique rhythmic genes in ELGs of NC treatment.			Unique rhythmic genes in ELGs of SiNPs treatment.	208982	Hmgcll1	Unique rhythmic genes in ELGs of SD+SiNPs treatment.			Shared rhythmic genes in ELGs among NC, SiNPs, SD+SiNPs treatments
108168395	'Gm45871'	Unique rhythmic genes in ELGs of NC treatment.			Unique rhythmic genes in ELGs of SiNPs treatment.	209018	Vps8	Unique rhythmic genes in ELGs of SD+SiNPs treatment.			Shared rhythmic genes in ELGs among NC, SiNPs, SD+SiNPs treatments
108168747	'Gm46735'	Unique rhythmic genes in ELGs of NC treatment.			Unique rhythmic genes in ELGs of SiNPs treatment.	209387	Trim30d	Unique rhythmic genes in ELGs of SD+SiNPs treatment.			Shared rhythmic genes in ELGs among NC, SiNPs, SD+SiNPs treatments
115488623	'LOC115488623'	Unique rhythmic genes in ELGs of NC treatment.			Unique rhythmic genes in ELGs of SiNPs treatment.	209558	Enpp3	Unique rhythmic genes in ELGs of SD+SiNPs treatment.			Shared rhythmic genes in ELGs among NC, SiNPs, SD+SiNPs treatments
115489121	'LOC115489121'	Unique rhythmic genes in ELGs of NC treatment.			Unique rhythmic genes in ELGs of SiNPs treatment.	209586	Nudcd3	Unique rhythmic genes in ELGs of SD+SiNPs treatment.			Shared rhythmic genes in ELGs among NC, SiNPs, SD+SiNPs treatments
115489141	'LOC115489141'	Unique rhythmic genes in ELGs of NC treatment.			Unique rhythmic genes in ELGs of SiNPs treatment.	209737	Kif15	Unique rhythmic genes in ELGs of SD+SiNPs treatment.			Shared rhythmic genes in ELGs among NC, SiNPs, SD+SiNPs treatments
115489733	'LOC115489733'	Unique rhythmic genes in ELGs of NC treatment.			Unique rhythmic genes in ELGs of SiNPs treatment.	210106	Tent4a	Unique rhythmic genes in ELGs of SD+SiNPs treatment.			Shared rhythmic genes in ELGs among NC, SiNPs, SD+SiNPs treatments
115489986	'LOC115489986'	Unique rhythmic genes in ELGs of NC treatment.			Unique rhythmic genes in ELGs of SiNPs treatment.	210622	Pamr1	Unique rhythmic genes in ELGs of SD+SiNPs treatment.			Shared rhythmic genes in ELGs among NC, SiNPs, SD+SiNPs treatments
115490127	'LOC115490127'	Unique rhythmic genes in ELGs of NC treatment.			Unique rhythmic genes in ELGs of SiNPs treatment.	211550	Tifa	Unique rhythmic genes in ELGs of SD+SiNPs treatment.			Shared rhythmic genes in ELGs among NC, SiNPs, SD+SiNPs treatments
						211652	Wwc1	Unique rhythmic genes in ELGs of SD+SiNPs treatment.			Shared rhythmic genes in ELGs among NC, SiNPs, SD+SiNPs treatments
						211922	Dennd6a	Unique rhythmic genes in ELGs of SD+SiNPs treatment.			Shared rhythmic genes in ELGs among NC, SiNPs, SD+SiNPs treatments
						212032	Hk3	Unique rhythmic genes in ELGs of SD+SiNPs treatment.			Shared rhythmic genes in ELGs among NC, SiNPs, SD+SiNPs treatments
						212442	Lactb2	Unique rhythmic genes in ELGs of SD+SiNPs treatment.			Shared rhythmic genes in ELGs among NC, SiNPs, SD+SiNPs treatments
						212647	Aldh4a1	Unique rhythmic genes in ELGs of SD+SiNPs treatment.			Shared rhythmic genes in ELGs among NC, SiNPs, SD+SiNPs treatments
						212880	Ddx46	Unique rhythmic genes in ELGs of SD+SiNPs treatment.			Shared rhythmic genes in ELGs among NC, SiNPs, SD+SiNPs treatments
						213056	Fam126b	Unique rhythmic genes in ELGs of SD+SiNPs treatment.			Shared rhythmic genes in ELGs among NC, SiNPs, SD+SiNPs treatments
						213121	Ankrd35	Unique rhythmic genes in ELGs of SD+SiNPs treatment.			Shared rhythmic genes in ELGs among NC, SiNPs, SD+SiNPs treatments
						213573	Cracr2b	Unique rhythmic genes in ELGs of SD+SiNPs treatment.			Shared rhythmic genes in ELGs among NC, SiNPs, SD+SiNPs treatments
						213753	Zfp598	Unique rhythmic genes in ELGs of SD+SiNPs treatment.			Shared rhythmic genes in ELGs among NC, SiNPs, SD+SiNPs treatments
						213783	Plekhg1	Unique rhythmic genes in ELGs of SD+SiNPs treatment.			Shared rhythmic genes in ELGs among NC, SiNPs, SD+SiNPs treatments
						213988	Tnrc6b	Unique rhythmic genes in ELGs of SD+SiNPs treatment.			Shared rhythmic genes in ELGs among NC, SiNPs, SD+SiNPs treatments
						214150	Ago3	Unique rhythmic genes in ELGs of SD+SiNPs treatment.			Shared rhythmic genes in ELGs among NC, SiNPs, SD+SiNPs treatments
						214230	Pak6	Unique rhythmic genes in ELGs of SD+SiNPs treatment.			Shared rhythmic genes in ELGs among NC, SiNPs, SD+SiNPs treatments
						214444	Cdk5rap2	Unique rhythmic genes in ELGs of SD+SiNPs treatment.			Shared rhythmic genes in ELGs among NC, SiNPs, SD+SiNPs treatments
						214469	Fam168b	Unique rhythmic genes in ELGs of SD+SiNPs treatment.			Shared rhythmic genes in ELGs among NC, SiNPs, SD+SiNPs treatments
						214585	Spg11	Unique rhythmic genes in ELGs of SD+SiNPs treatment.			Shared rhythmic genes in ELGs among NC, SiNPs, SD+SiNPs treatments
						214627	Tent4b	Unique rhythmic genes in ELGs of SD+SiNPs treatment.			Shared rhythmic genes in ELGs among NC, SiNPs, SD+SiNPs treatments
						214742	Rcor3	Unique rhythmic genes in ELGs of SD+SiNPs treatment.			Shared rhythmic genes in ELGs among NC, SiNPs, SD+SiNPs treatments
						214804	Syde2	Unique rhythmic genes in ELGs of SD+SiNPs treatment.			Shared rhythmic genes in ELGs among NC, SiNPs, SD+SiNPs treatments
						214855	Arid5a	Unique rhythmic genes in ELGs of SD+SiNPs treatment.			Shared rhythmic genes in ELGs among NC, SiNPs, SD+SiNPs treatments
						214901	Chtf18	Unique rhythmic genes in ELGs of SD+SiNPs treatment.			Shared rhythmic genes in ELGs among NC, SiNPs, SD+SiNPs treatments
						215201	Trmt2b	Unique rhythmic genes in ELGs of SD+SiNPs treatment.			Shared rhythmic genes in ELGs among NC, SiNPs, SD+SiNPs treatments
						215384	Fcgbp	Unique rhythmic genes in ELGs of SD+SiNPs treatment.			Shared rhythmic genes in ELGs among NC, SiNPs, SD+SiNPs treatments
						215449	Rap1b	Unique rhythmic genes in ELGs of SD+SiNPs treatment.			Shared rhythmic genes in ELGs among NC, SiNPs, SD+SiNPs treatments
						215474	Sec22c	Unique rhythmic genes in ELGs of SD+SiNPs treatment.			Shared rhythmic genes in ELGs among NC, SiNPs, SD+SiNPs treatments
						215693	Zmat1	Unique rhythmic genes in ELGs of SD+SiNPs treatment.			Shared rhythmic genes in ELGs among NC, SiNPs, SD+SiNPs treatments
						215748	Cnksr3	Unique rhythmic genes in ELGs of SD+SiNPs treatment.			Shared rhythmic genes in ELGs among NC, SiNPs, SD+SiNPs treatments
						215798	Adgrg6	Unique rhythmic genes in ELGs of SD+SiNPs treatment.			Shared rhythmic genes in ELGs among NC, SiNPs, SD+SiNPs treatments
						216131	Trappc10	Unique rhythmic genes in ELGs of SD+SiNPs treatment.			Shared rhythmic genes in ELGs among NC, SiNPs, SD+SiNPs treatments
						216152	Plppr3	Unique rhythmic genes in ELGs of SD+SiNPs treatment.			Shared rhythmic genes in ELGs among NC, SiNPs, SD+SiNPs treatments
						216225	Slc5a8	Unique rhythmic genes in ELGs of SD+SiNPs treatment.			Shared rhythmic genes in ELGs among NC, SiNPs, SD+SiNPs treatments
						216350	Tspan8	Unique rhythmic genes in ELGs of SD+SiNPs treatment.			Shared rhythmic genes in ELGs among NC, SiNPs, SD+SiNPs treatments
						216363	Rab3ip	Unique rhythmic genes in ELGs of SD+SiNPs treatment.			Shared rhythmic genes in ELGs among NC, SiNPs, SD+SiNPs treatments
						216395	Rxylt1	Unique rhythmic genes in ELGs of SD+SiNPs treatment.			Shared rhythmic genes in ELGs among NC, SiNPs, SD+SiNPs treatments
						216443	Mars	Unique rhythmic genes in ELGs of SD+SiNPs treatment.			Shared rhythmic genes in ELGs among NC, SiNPs, SD+SiNPs treatments
						216558	Ugp2	Unique rhythmic genes in ELGs of SD+SiNPs treatment.			Shared rhythmic genes in ELGs among NC, SiNPs, SD+SiNPs treatments
						216860	Neurl4	Unique rhythmic genes in ELGs of SD+SiNPs treatment.			Shared rhythmic genes in ELGs among NC, SiNPs, SD+SiNPs treatments
						216869	Arrb2	Unique rhythmic genes in ELGs of SD+SiNPs treatment.			Shared rhythmic genes in ELGs among NC, SiNPs, SD+SiNPs treatments
						217127	Kat7	Unique rhythmic genes in ELGs of SD+SiNPs treatment.			Shared rhythmic genes in ELGs among NC, SiNPs, SD+SiNPs treatments
						217203	Tmem106a	Unique rhythmic genes in ELGs of SD+SiNPs treatment.			Shared rhythmic genes in ELGs among NC, SiNPs, SD+SiNPs treatments
						217219	Fam171a2	Unique rhythmic genes in ELGs of SD+SiNPs treatment.			Shared rhythmic genes in ELGs among NC, SiNPs, SD+SiNPs treatments
						217265	Abca5	Unique rhythmic genes in ELGs of SD+SiNPs treatment.			Shared rhythmic genes in ELGs among NC, SiNPs, SD+SiNPs treatments
						217304	Cd300lb	Unique rhythmic genes in ELGs of SD+SiNPs treatment.			Shared rhythmic genes in ELGs among NC, SiNPs, SD+SiNPs treatments
						217305	Cd300ld	Unique rhythmic genes in ELGs of SD+SiNPs treatment.			Shared rhythmic genes in ELGs among NC, SiNPs, SD+SiNPs treatments
						217310	Hid1	Unique rhythmic genes in ELGs of SD+SiNPs treatment.			Shared rhythmic genes in ELGs among NC, SiNPs, SD+SiNPs treatments
						217325	Llgl2	Unique rhythmic genes in ELGs of SD+SiNPs treatment.			Shared rhythmic genes in ELGs among NC, SiNPs, SD+SiNPs treatments
						217333	Trim47	Unique rhythmic genes in ELGs of SD+SiNPs treatment.			Shared rhythmic genes in ELGs among NC, SiNPs, SD+SiNPs treatments
						217337	Srp68	Unique rhythmic genes in ELGs of SD+SiNPs treatment.			Shared rhythmic genes in ELGs among NC, SiNPs, SD+SiNPs treatments
						217366	Lrrc45	Unique rhythmic genes in ELGs of SD+SiNPs treatment.			Shared rhythmic genes in ELGs among NC, SiNPs, SD+SiNPs treatments
						217430	Pqlc3	Unique rhythmic genes in ELGs of SD+SiNPs treatment.			Shared rhythmic genes in ELGs among NC, SiNPs, SD+SiNPs treatments
						217684	Susd6	Unique rhythmic genes in ELGs of SD+SiNPs treatment.			Shared rhythmic genes in ELGs among NC, SiNPs, SD+SiNPs treatments
						217946	Cdca7l	Unique rhythmic genes in ELGs of SD+SiNPs treatment.			Shared rhythmic genes in ELGs among NC, SiNPs, SD+SiNPs treatments
						218035	Vps41	Unique rhythmic genes in ELGs of SD+SiNPs treatment.			Shared rhythmic genes in ELGs among NC, SiNPs, SD+SiNPs treatments
						218518	Marveld2	Unique rhythmic genes in ELGs of SD+SiNPs treatment.			Shared rhythmic genes in ELGs among NC, SiNPs, SD+SiNPs treatments
						218693	Paip1	Unique rhythmic genes in ELGs of SD+SiNPs treatment.			Shared rhythmic genes in ELGs among NC, SiNPs, SD+SiNPs treatments
						218885	Oxnad1	Unique rhythmic genes in ELGs of SD+SiNPs treatment.			Shared rhythmic genes in ELGs among NC, SiNPs, SD+SiNPs treatments
						218973	Wdhd1	Unique rhythmic genes in ELGs of SD+SiNPs treatment.			Shared rhythmic genes in ELGs among NC, SiNPs, SD+SiNPs treatments
						219022	Ttc5	Unique rhythmic genes in ELGs of SD+SiNPs treatment.			Shared rhythmic genes in ELGs among NC, SiNPs, SD+SiNPs treatments
						223255	Stk24	Unique rhythmic genes in ELGs of SD+SiNPs treatment.			Shared rhythmic genes in ELGs among NC, SiNPs, SD+SiNPs treatments
						223601	Fam49b	Unique rhythmic genes in ELGs of SD+SiNPs treatment.			Shared rhythmic genes in ELGs among NC, SiNPs, SD+SiNPs treatments
						223626	Them6	Unique rhythmic genes in ELGs of SD+SiNPs treatment.			Shared rhythmic genes in ELGs among NC, SiNPs, SD+SiNPs treatments
						223650	Eppk1	Unique rhythmic genes in ELGs of SD+SiNPs treatment.			Shared rhythmic genes in ELGs among NC, SiNPs, SD+SiNPs treatments
						223753	Cerk	Unique rhythmic genes in ELGs of SD+SiNPs treatment.			Shared rhythmic genes in ELGs among NC, SiNPs, SD+SiNPs treatments
						223770	Brd1	Unique rhythmic genes in ELGs of SD+SiNPs treatment.			Shared rhythmic genes in ELGs among NC, SiNPs, SD+SiNPs treatments
						223776	Selenoo	Unique rhythmic genes in ELGs of SD+SiNPs treatment.			Shared rhythmic genes in ELGs among NC, SiNPs, SD+SiNPs treatments
						223870	Senp1	Unique rhythmic genes in ELGs of SD+SiNPs treatment.			Shared rhythmic genes in ELGs among NC, SiNPs, SD+SiNPs treatments
						223921	Aaas	Unique rhythmic genes in ELGs of SD+SiNPs treatment.			Shared rhythmic genes in ELGs among NC, SiNPs, SD+SiNPs treatments
						223922	Atf7	Unique rhythmic genes in ELGs of SD+SiNPs treatment.			Shared rhythmic genes in ELGs among NC, SiNPs, SD+SiNPs treatments
						224111	Ubxn7	Unique rhythmic genes in ELGs of SD+SiNPs treatment.			Shared rhythmic genes in ELGs among NC, SiNPs, SD+SiNPs treatments
						224598	Zfp758	Unique rhythmic genes in ELGs of SD+SiNPs treatment.			Shared rhythmic genes in ELGs among NC, SiNPs, SD+SiNPs treatments
						224694	Zfp81	Unique rhythmic genes in ELGs of SD+SiNPs treatment.			Shared rhythmic genes in ELGs among NC, SiNPs, SD+SiNPs treatments
						225027	Srsf7	Unique rhythmic genes in ELGs of SD+SiNPs treatment.			Shared rhythmic genes in ELGs among NC, SiNPs, SD+SiNPs treatments
						225049	Ttc7	Unique rhythmic genes in ELGs of SD+SiNPs treatment.			Shared rhythmic genes in ELGs among NC, SiNPs, SD+SiNPs treatments
						225207	Zfp521	Unique rhythmic genes in ELGs of SD+SiNPs treatment.			Shared rhythmic genes in ELGs among NC, SiNPs, SD+SiNPs treatments
						225288	Fhod3	Unique rhythmic genes in ELGs of SD+SiNPs treatment.			Shared rhythmic genes in ELGs among NC, SiNPs, SD+SiNPs treatments
						225289	AW554918	Unique rhythmic genes in ELGs of SD+SiNPs treatment.			Shared rhythmic genes in ELGs among NC, SiNPs, SD+SiNPs treatments
						226255	Atrnl1	Unique rhythmic genes in ELGs of SD+SiNPs treatment.			Shared rhythmic genes in ELGs among NC, SiNPs, SD+SiNPs treatments
						226407	Rab3gap1	Unique rhythmic genes in ELGs of SD+SiNPs treatment.			Shared rhythmic genes in ELGs among NC, SiNPs, SD+SiNPs treatments
						226409	Zranb3	Unique rhythmic genes in ELGs of SD+SiNPs treatment.			Shared rhythmic genes in ELGs among NC, SiNPs, SD+SiNPs treatments
						226442	Zfp281	Unique rhythmic genes in ELGs of SD+SiNPs treatment.			Shared rhythmic genes in ELGs among NC, SiNPs, SD+SiNPs treatments
						226541	Klhl20	Unique rhythmic genes in ELGs of SD+SiNPs treatment.			Shared rhythmic genes in ELGs among NC, SiNPs, SD+SiNPs treatments
						226646	Ndufs2	Unique rhythmic genes in ELGs of SD+SiNPs treatment.			Shared rhythmic genes in ELGs among NC, SiNPs, SD+SiNPs treatments
						226744	Cnst	Unique rhythmic genes in ELGs of SD+SiNPs treatment.			Shared rhythmic genes in ELGs among NC, SiNPs, SD+SiNPs treatments
						226777	C130074G19Rik	Unique rhythmic genes in ELGs of SD+SiNPs treatment.			Shared rhythmic genes in ELGs among NC, SiNPs, SD+SiNPs treatments
						227095	Hibch	Unique rhythmic genes in ELGs of SD+SiNPs treatment.			Shared rhythmic genes in ELGs among NC, SiNPs, SD+SiNPs treatments
						227292	Ctdsp1	Unique rhythmic genes in ELGs of SD+SiNPs treatment.			Shared rhythmic genes in ELGs among NC, SiNPs, SD+SiNPs treatments
						227298	Retreg2	Unique rhythmic genes in ELGs of SD+SiNPs treatment.			Shared rhythmic genes in ELGs among NC, SiNPs, SD+SiNPs treatments
						227394	Slco4c1	Unique rhythmic genes in ELGs of SD+SiNPs treatment.			Shared rhythmic genes in ELGs among NC, SiNPs, SD+SiNPs treatments
						227485	Cdh19	Unique rhythmic genes in ELGs of SD+SiNPs treatment.			Shared rhythmic genes in ELGs among NC, SiNPs, SD+SiNPs treatments
						227693	Zer1	Unique rhythmic genes in ELGs of SD+SiNPs treatment.			Shared rhythmic genes in ELGs among NC, SiNPs, SD+SiNPs treatments
						227696	Phyhd1	Unique rhythmic genes in ELGs of SD+SiNPs treatment.			Shared rhythmic genes in ELGs among NC, SiNPs, SD+SiNPs treatments
						228012	Tlk1	Unique rhythmic genes in ELGs of SD+SiNPs treatment.			Shared rhythmic genes in ELGs among NC, SiNPs, SD+SiNPs treatments
						228026	Pdk1	Unique rhythmic genes in ELGs of SD+SiNPs treatment.			Shared rhythmic genes in ELGs among NC, SiNPs, SD+SiNPs treatments
						228033	Atp5g3	Unique rhythmic genes in ELGs of SD+SiNPs treatment.			Shared rhythmic genes in ELGs among NC, SiNPs, SD+SiNPs treatments
						228366	Large2	Unique rhythmic genes in ELGs of SD+SiNPs treatment.			Shared rhythmic genes in ELGs among NC, SiNPs, SD+SiNPs treatments
						228875	Slc35c2	Unique rhythmic genes in ELGs of SD+SiNPs treatment.			Shared rhythmic genes in ELGs among NC, SiNPs, SD+SiNPs treatments
						228911	Tshz2	Unique rhythmic genes in ELGs of SD+SiNPs treatment.			Shared rhythmic genes in ELGs among NC, SiNPs, SD+SiNPs treatments
						228993	Slc17a9	Unique rhythmic genes in ELGs of SD+SiNPs treatment.			Shared rhythmic genes in ELGs among NC, SiNPs, SD+SiNPs treatments
						229055	Zbtb10	Unique rhythmic genes in ELGs of SD+SiNPs treatment.			Shared rhythmic genes in ELGs among NC, SiNPs, SD+SiNPs treatments
						229488	Fam160a1	Unique rhythmic genes in ELGs of SD+SiNPs treatment.			Shared rhythmic genes in ELGs among NC, SiNPs, SD+SiNPs treatments
						229512	Smg5	Unique rhythmic genes in ELGs of SD+SiNPs treatment.			Shared rhythmic genes in ELGs among NC, SiNPs, SD+SiNPs treatments
						229658	Vangl1	Unique rhythmic genes in ELGs of SD+SiNPs treatment.			Shared rhythmic genes in ELGs among NC, SiNPs, SD+SiNPs treatments
						229675	Rsbn1	Unique rhythmic genes in ELGs of SD+SiNPs treatment.			Shared rhythmic genes in ELGs among NC, SiNPs, SD+SiNPs treatments
						229725	Clcc1	Unique rhythmic genes in ELGs of SD+SiNPs treatment.			Shared rhythmic genes in ELGs among NC, SiNPs, SD+SiNPs treatments
						229782	Slc35a3	Unique rhythmic genes in ELGs of SD+SiNPs treatment.			Shared rhythmic genes in ELGs among NC, SiNPs, SD+SiNPs treatments
						229791	Plppr4	Unique rhythmic genes in ELGs of SD+SiNPs treatment.			Shared rhythmic genes in ELGs among NC, SiNPs, SD+SiNPs treatments
						229905	Kyat3	Unique rhythmic genes in ELGs of SD+SiNPs treatment.			Shared rhythmic genes in ELGs among NC, SiNPs, SD+SiNPs treatments
						230125	Slc25a51	Unique rhythmic genes in ELGs of SD+SiNPs treatment.			Shared rhythmic genes in ELGs among NC, SiNPs, SD+SiNPs treatments
						230259	E130308A19Rik	Unique rhythmic genes in ELGs of SD+SiNPs treatment.			Shared rhythmic genes in ELGs among NC, SiNPs, SD+SiNPs treatments
						230316	Megf9	Unique rhythmic genes in ELGs of SD+SiNPs treatment.			Shared rhythmic genes in ELGs among NC, SiNPs, SD+SiNPs treatments
						230459	Cyp2j13	Unique rhythmic genes in ELGs of SD+SiNPs treatment.			Shared rhythmic genes in ELGs among NC, SiNPs, SD+SiNPs treatments
						230484	Usp1	Unique rhythmic genes in ELGs of SD+SiNPs treatment.			Shared rhythmic genes in ELGs among NC, SiNPs, SD+SiNPs treatments
						230649	Atpaf1	Unique rhythmic genes in ELGs of SD+SiNPs treatment.			Shared rhythmic genes in ELGs among NC, SiNPs, SD+SiNPs treatments
						230654	Lrrc41	Unique rhythmic genes in ELGs of SD+SiNPs treatment.			Shared rhythmic genes in ELGs among NC, SiNPs, SD+SiNPs treatments
						230726	Rhbdl2	Unique rhythmic genes in ELGs of SD+SiNPs treatment.			Shared rhythmic genes in ELGs among NC, SiNPs, SD+SiNPs treatments
						230766	Fam167b	Unique rhythmic genes in ELGs of SD+SiNPs treatment.			Shared rhythmic genes in ELGs among NC, SiNPs, SD+SiNPs treatments
						230784	Sesn2	Unique rhythmic genes in ELGs of SD+SiNPs treatment.			Shared rhythmic genes in ELGs among NC, SiNPs, SD+SiNPs treatments
						230815	Man1c1	Unique rhythmic genes in ELGs of SD+SiNPs treatment.			Shared rhythmic genes in ELGs among NC, SiNPs, SD+SiNPs treatments
						230903	Fbxo44	Unique rhythmic genes in ELGs of SD+SiNPs treatment.			Shared rhythmic genes in ELGs among NC, SiNPs, SD+SiNPs treatments
						231070	Insig1	Unique rhythmic genes in ELGs of SD+SiNPs treatment.			Shared rhythmic genes in ELGs among NC, SiNPs, SD+SiNPs treatments
						231086	Hadhb	Unique rhythmic genes in ELGs of SD+SiNPs treatment.			Shared rhythmic genes in ELGs among NC, SiNPs, SD+SiNPs treatments
						231103	Gckr	Unique rhythmic genes in ELGs of SD+SiNPs treatment.			Shared rhythmic genes in ELGs among NC, SiNPs, SD+SiNPs treatments
						231207	Cpeb2	Unique rhythmic genes in ELGs of SD+SiNPs treatment.			Shared rhythmic genes in ELGs among NC, SiNPs, SD+SiNPs treatments
						231293	Cwh43	Unique rhythmic genes in ELGs of SD+SiNPs treatment.			Shared rhythmic genes in ELGs among NC, SiNPs, SD+SiNPs treatments
						231506	Lin54	Unique rhythmic genes in ELGs of SD+SiNPs treatment.			Shared rhythmic genes in ELGs among NC, SiNPs, SD+SiNPs treatments
						231571	Rpap2	Unique rhythmic genes in ELGs of SD+SiNPs treatment.			Shared rhythmic genes in ELGs among NC, SiNPs, SD+SiNPs treatments
						231821	Adap1	Unique rhythmic genes in ELGs of SD+SiNPs treatment.			Shared rhythmic genes in ELGs among NC, SiNPs, SD+SiNPs treatments
						231889	Bud31	Unique rhythmic genes in ELGs of SD+SiNPs treatment.			Shared rhythmic genes in ELGs among NC, SiNPs, SD+SiNPs treatments
						231932	Gimap7	Unique rhythmic genes in ELGs of SD+SiNPs treatment.			Shared rhythmic genes in ELGs among NC, SiNPs, SD+SiNPs treatments
						232023	Vopp1	Unique rhythmic genes in ELGs of SD+SiNPs treatment.			Shared rhythmic genes in ELGs among NC, SiNPs, SD+SiNPs treatments
						232035	Ccser1	Unique rhythmic genes in ELGs of SD+SiNPs treatment.			Shared rhythmic genes in ELGs among NC, SiNPs, SD+SiNPs treatments
						232164	Paip2b	Unique rhythmic genes in ELGs of SD+SiNPs treatment.			Shared rhythmic genes in ELGs among NC, SiNPs, SD+SiNPs treatments
						232414	Clec9a	Unique rhythmic genes in ELGs of SD+SiNPs treatment.			Shared rhythmic genes in ELGs among NC, SiNPs, SD+SiNPs treatments
						232430	Crebl2	Unique rhythmic genes in ELGs of SD+SiNPs treatment.			Shared rhythmic genes in ELGs among NC, SiNPs, SD+SiNPs treatments
						232536	Mrps35	Unique rhythmic genes in ELGs of SD+SiNPs treatment.			Shared rhythmic genes in ELGs among NC, SiNPs, SD+SiNPs treatments
						232807	Ppp1r12c	Unique rhythmic genes in ELGs of SD+SiNPs treatment.			Shared rhythmic genes in ELGs among NC, SiNPs, SD+SiNPs treatments
						232853	Zfp954	Unique rhythmic genes in ELGs of SD+SiNPs treatment.			Shared rhythmic genes in ELGs among NC, SiNPs, SD+SiNPs treatments
						232947	Ppp1r37	Unique rhythmic genes in ELGs of SD+SiNPs treatment.			Shared rhythmic genes in ELGs among NC, SiNPs, SD+SiNPs treatments
						233280	Nipa1	Unique rhythmic genes in ELGs of SD+SiNPs treatment.			Shared rhythmic genes in ELGs among NC, SiNPs, SD+SiNPs treatments
						233410	Zfp592	Unique rhythmic genes in ELGs of SD+SiNPs treatment.			Shared rhythmic genes in ELGs among NC, SiNPs, SD+SiNPs treatments
						233805	Dcun1d3	Unique rhythmic genes in ELGs of SD+SiNPs treatment.			Shared rhythmic genes in ELGs among NC, SiNPs, SD+SiNPs treatments
						233824	Cog7	Unique rhythmic genes in ELGs of SD+SiNPs treatment.			Shared rhythmic genes in ELGs among NC, SiNPs, SD+SiNPs treatments
						233899	Ccdc189	Unique rhythmic genes in ELGs of SD+SiNPs treatment.			Shared rhythmic genes in ELGs among NC, SiNPs, SD+SiNPs treatments
						234214	Sorbs2	Unique rhythmic genes in ELGs of SD+SiNPs treatment.			Shared rhythmic genes in ELGs among NC, SiNPs, SD+SiNPs treatments
						234353	Psd3	Unique rhythmic genes in ELGs of SD+SiNPs treatment.			Shared rhythmic genes in ELGs among NC, SiNPs, SD+SiNPs treatments
						234463	Tmem184c	Unique rhythmic genes in ELGs of SD+SiNPs treatment.			Shared rhythmic genes in ELGs among NC, SiNPs, SD+SiNPs treatments
						234594	Cnot1	Unique rhythmic genes in ELGs of SD+SiNPs treatment.			Shared rhythmic genes in ELGs among NC, SiNPs, SD+SiNPs treatments
						234664	Nae1	Unique rhythmic genes in ELGs of SD+SiNPs treatment.			Shared rhythmic genes in ELGs among NC, SiNPs, SD+SiNPs treatments
						234736	Rfwd3	Unique rhythmic genes in ELGs of SD+SiNPs treatment.			Shared rhythmic genes in ELGs among NC, SiNPs, SD+SiNPs treatments
						234825	Klhdc4	Unique rhythmic genes in ELGs of SD+SiNPs treatment.			Shared rhythmic genes in ELGs among NC, SiNPs, SD+SiNPs treatments
						234839	Piezo1	Unique rhythmic genes in ELGs of SD+SiNPs treatment.			Shared rhythmic genes in ELGs among NC, SiNPs, SD+SiNPs treatments
						234912	Cfap300	Unique rhythmic genes in ELGs of SD+SiNPs treatment.			Shared rhythmic genes in ELGs among NC, SiNPs, SD+SiNPs treatments
						235036	Ppan	Unique rhythmic genes in ELGs of SD+SiNPs treatment.			Shared rhythmic genes in ELGs among NC, SiNPs, SD+SiNPs treatments
						235442	Rab8b	Unique rhythmic genes in ELGs of SD+SiNPs treatment.			Shared rhythmic genes in ELGs among NC, SiNPs, SD+SiNPs treatments
						235461	Mindy2	Unique rhythmic genes in ELGs of SD+SiNPs treatment.			Shared rhythmic genes in ELGs among NC, SiNPs, SD+SiNPs treatments
						235674	Acaa1b	Unique rhythmic genes in ELGs of SD+SiNPs treatment.			Shared rhythmic genes in ELGs among NC, SiNPs, SD+SiNPs treatments
						235956	Zfp825	Unique rhythmic genes in ELGs of SD+SiNPs treatment.			Shared rhythmic genes in ELGs among NC, SiNPs, SD+SiNPs treatments
						236643	Sytl5	Unique rhythmic genes in ELGs of SD+SiNPs treatment.			Shared rhythmic genes in ELGs among NC, SiNPs, SD+SiNPs treatments
						236899	Pcyt1b	Unique rhythmic genes in ELGs of SD+SiNPs treatment.			Shared rhythmic genes in ELGs among NC, SiNPs, SD+SiNPs treatments
						236900	Pdk3	Unique rhythmic genes in ELGs of SD+SiNPs treatment.			Shared rhythmic genes in ELGs among NC, SiNPs, SD+SiNPs treatments
						237300	Gm4922	Unique rhythmic genes in ELGs of SD+SiNPs treatment.			Shared rhythmic genes in ELGs among NC, SiNPs, SD+SiNPs treatments
						237336	Tbpl1	Unique rhythmic genes in ELGs of SD+SiNPs treatment.			Shared rhythmic genes in ELGs among NC, SiNPs, SD+SiNPs treatments
						237500	Tmtc3	Unique rhythmic genes in ELGs of SD+SiNPs treatment.			Shared rhythmic genes in ELGs among NC, SiNPs, SD+SiNPs treatments
						237979	Sdk2	Unique rhythmic genes in ELGs of SD+SiNPs treatment.			Shared rhythmic genes in ELGs among NC, SiNPs, SD+SiNPs treatments
						238024	Fn3krp	Unique rhythmic genes in ELGs of SD+SiNPs treatment.			Shared rhythmic genes in ELGs among NC, SiNPs, SD+SiNPs treatments
						238505	Mtr	Unique rhythmic genes in ELGs of SD+SiNPs treatment.			Shared rhythmic genes in ELGs among NC, SiNPs, SD+SiNPs treatments
						238673	Zfp367	Unique rhythmic genes in ELGs of SD+SiNPs treatment.			Shared rhythmic genes in ELGs among NC, SiNPs, SD+SiNPs treatments
						238799	Tnpo1	Unique rhythmic genes in ELGs of SD+SiNPs treatment.			Shared rhythmic genes in ELGs among NC, SiNPs, SD+SiNPs treatments
						238871	Pde4d	Unique rhythmic genes in ELGs of SD+SiNPs treatment.			Shared rhythmic genes in ELGs among NC, SiNPs, SD+SiNPs treatments
						240025	Dact2	Unique rhythmic genes in ELGs of SD+SiNPs treatment.			Shared rhythmic genes in ELGs among NC, SiNPs, SD+SiNPs treatments
						240186	Zfp438	Unique rhythmic genes in ELGs of SD+SiNPs treatment.			Shared rhythmic genes in ELGs among NC, SiNPs, SD+SiNPs treatments
						240328	F830016B08Rik	Unique rhythmic genes in ELGs of SD+SiNPs treatment.			Shared rhythmic genes in ELGs among NC, SiNPs, SD+SiNPs treatments
						240334	Pcyox1l	Unique rhythmic genes in ELGs of SD+SiNPs treatment.			Shared rhythmic genes in ELGs among NC, SiNPs, SD+SiNPs treatments
						240505	Cdc42bpg	Unique rhythmic genes in ELGs of SD+SiNPs treatment.			Shared rhythmic genes in ELGs among NC, SiNPs, SD+SiNPs treatments
						240518	Peli3	Unique rhythmic genes in ELGs of SD+SiNPs treatment.			Shared rhythmic genes in ELGs among NC, SiNPs, SD+SiNPs treatments
						241230	St8sia6	Unique rhythmic genes in ELGs of SD+SiNPs treatment.			Shared rhythmic genes in ELGs among NC, SiNPs, SD+SiNPs treatments
						241303	Fam78a	Unique rhythmic genes in ELGs of SD+SiNPs treatment.			Shared rhythmic genes in ELGs among NC, SiNPs, SD+SiNPs treatments
						241846	Lsm14b	Unique rhythmic genes in ELGs of SD+SiNPs treatment.			Shared rhythmic genes in ELGs among NC, SiNPs, SD+SiNPs treatments
						242037	Ankub1	Unique rhythmic genes in ELGs of SD+SiNPs treatment.			Shared rhythmic genes in ELGs among NC, SiNPs, SD+SiNPs treatments
						242341	Atp6v0d2	Unique rhythmic genes in ELGs of SD+SiNPs treatment.			Shared rhythmic genes in ELGs among NC, SiNPs, SD+SiNPs treatments
						242377	Pm20d2	Unique rhythmic genes in ELGs of SD+SiNPs treatment.			Shared rhythmic genes in ELGs among NC, SiNPs, SD+SiNPs treatments
						242585	Slc35d1	Unique rhythmic genes in ELGs of SD+SiNPs treatment.			Shared rhythmic genes in ELGs among NC, SiNPs, SD+SiNPs treatments
						242667	Dlgap3	Unique rhythmic genes in ELGs of SD+SiNPs treatment.			Shared rhythmic genes in ELGs among NC, SiNPs, SD+SiNPs treatments
						242785	Klhl21	Unique rhythmic genes in ELGs of SD+SiNPs treatment.			Shared rhythmic genes in ELGs among NC, SiNPs, SD+SiNPs treatments
						243910	Nfkbid	Unique rhythmic genes in ELGs of SD+SiNPs treatment.			Shared rhythmic genes in ELGs among NC, SiNPs, SD+SiNPs treatments
						244879	Npat	Unique rhythmic genes in ELGs of SD+SiNPs treatment.			Shared rhythmic genes in ELGs among NC, SiNPs, SD+SiNPs treatments
						245532	Awat2	Unique rhythmic genes in ELGs of SD+SiNPs treatment.			Shared rhythmic genes in ELGs among NC, SiNPs, SD+SiNPs treatments
						245631	Pwwp3b	Unique rhythmic genes in ELGs of SD+SiNPs treatment.			Shared rhythmic genes in ELGs among NC, SiNPs, SD+SiNPs treatments
						245688	Rbbp7	Unique rhythmic genes in ELGs of SD+SiNPs treatment.			Shared rhythmic genes in ELGs among NC, SiNPs, SD+SiNPs treatments
						245886	Ankrd27	Unique rhythmic genes in ELGs of SD+SiNPs treatment.			Shared rhythmic genes in ELGs among NC, SiNPs, SD+SiNPs treatments
						246177	Myo1g	Unique rhythmic genes in ELGs of SD+SiNPs treatment.			Shared rhythmic genes in ELGs among NC, SiNPs, SD+SiNPs treatments
						246694	Hps5	Unique rhythmic genes in ELGs of SD+SiNPs treatment.			Shared rhythmic genes in ELGs among NC, SiNPs, SD+SiNPs treatments
						246703	Naxe	Unique rhythmic genes in ELGs of SD+SiNPs treatment.			Shared rhythmic genes in ELGs among NC, SiNPs, SD+SiNPs treatments
						260302	Gga3	Unique rhythmic genes in ELGs of SD+SiNPs treatment.			Shared rhythmic genes in ELGs among NC, SiNPs, SD+SiNPs treatments
						266781	Snx17	Unique rhythmic genes in ELGs of SD+SiNPs treatment.			Shared rhythmic genes in ELGs among NC, SiNPs, SD+SiNPs treatments
						268373	Ppia	Unique rhythmic genes in ELGs of SD+SiNPs treatment.			Shared rhythmic genes in ELGs among NC, SiNPs, SD+SiNPs treatments
						268752	Wdfy2	Unique rhythmic genes in ELGs of SD+SiNPs treatment.			Shared rhythmic genes in ELGs among NC, SiNPs, SD+SiNPs treatments
						268880	Xxylt1	Unique rhythmic genes in ELGs of SD+SiNPs treatment.			Shared rhythmic genes in ELGs among NC, SiNPs, SD+SiNPs treatments
						268933	Wdr24	Unique rhythmic genes in ELGs of SD+SiNPs treatment.			Shared rhythmic genes in ELGs among NC, SiNPs, SD+SiNPs treatments
						268980	Strn	Unique rhythmic genes in ELGs of SD+SiNPs treatment.			Shared rhythmic genes in ELGs among NC, SiNPs, SD+SiNPs treatments
						268996	Ss18	Unique rhythmic genes in ELGs of SD+SiNPs treatment.			Shared rhythmic genes in ELGs among NC, SiNPs, SD+SiNPs treatments
						269113	Nup54	Unique rhythmic genes in ELGs of SD+SiNPs treatment.			Shared rhythmic genes in ELGs among NC, SiNPs, SD+SiNPs treatments
						269116	Nfasc	Unique rhythmic genes in ELGs of SD+SiNPs treatment.			Shared rhythmic genes in ELGs among NC, SiNPs, SD+SiNPs treatments
						269181	Mgat4a	Unique rhythmic genes in ELGs of SD+SiNPs treatment.			Shared rhythmic genes in ELGs among NC, SiNPs, SD+SiNPs treatments
						269198	Nbeal1	Unique rhythmic genes in ELGs of SD+SiNPs treatment.			Shared rhythmic genes in ELGs among NC, SiNPs, SD+SiNPs treatments
						269424	Jade1	Unique rhythmic genes in ELGs of SD+SiNPs treatment.			Shared rhythmic genes in ELGs among NC, SiNPs, SD+SiNPs treatments
						269589	Sytl1	Unique rhythmic genes in ELGs of SD+SiNPs treatment.			Shared rhythmic genes in ELGs among NC, SiNPs, SD+SiNPs treatments
						269952	Gdpgp1	Unique rhythmic genes in ELGs of SD+SiNPs treatment.			Shared rhythmic genes in ELGs among NC, SiNPs, SD+SiNPs treatments
						271457	Rab5a	Unique rhythmic genes in ELGs of SD+SiNPs treatment.			Shared rhythmic genes in ELGs among NC, SiNPs, SD+SiNPs treatments
						272382	Spib	Unique rhythmic genes in ELGs of SD+SiNPs treatment.			Shared rhythmic genes in ELGs among NC, SiNPs, SD+SiNPs treatments
						272551	Gins2	Unique rhythmic genes in ELGs of SD+SiNPs treatment.			Shared rhythmic genes in ELGs among NC, SiNPs, SD+SiNPs treatments
						276770	Eif5a	Unique rhythmic genes in ELGs of SD+SiNPs treatment.			Shared rhythmic genes in ELGs among NC, SiNPs, SD+SiNPs treatments
						276846	Pigs	Unique rhythmic genes in ELGs of SD+SiNPs treatment.			Shared rhythmic genes in ELGs among NC, SiNPs, SD+SiNPs treatments
						277353	Tcfl5	Unique rhythmic genes in ELGs of SD+SiNPs treatment.			Shared rhythmic genes in ELGs among NC, SiNPs, SD+SiNPs treatments
						278279	Tmtc2	Unique rhythmic genes in ELGs of SD+SiNPs treatment.			Shared rhythmic genes in ELGs among NC, SiNPs, SD+SiNPs treatments
						317677	C1s2	Unique rhythmic genes in ELGs of SD+SiNPs treatment.			Shared rhythmic genes in ELGs among NC, SiNPs, SD+SiNPs treatments
						319179	H2bc6	Unique rhythmic genes in ELGs of SD+SiNPs treatment.			Shared rhythmic genes in ELGs among NC, SiNPs, SD+SiNPs treatments
						319513	Pced1a	Unique rhythmic genes in ELGs of SD+SiNPs treatment.			Shared rhythmic genes in ELGs among NC, SiNPs, SD+SiNPs treatments
						319638	Nt5dc1	Unique rhythmic genes in ELGs of SD+SiNPs treatment.			Shared rhythmic genes in ELGs among NC, SiNPs, SD+SiNPs treatments
						319765	Igf2bp2	Unique rhythmic genes in ELGs of SD+SiNPs treatment.			Shared rhythmic genes in ELGs among NC, SiNPs, SD+SiNPs treatments
						319822	Smyd4	Unique rhythmic genes in ELGs of SD+SiNPs treatment.			Shared rhythmic genes in ELGs among NC, SiNPs, SD+SiNPs treatments
						320007	Sidt1	Unique rhythmic genes in ELGs of SD+SiNPs treatment.			Shared rhythmic genes in ELGs among NC, SiNPs, SD+SiNPs treatments
						320100	Relt	Unique rhythmic genes in ELGs of SD+SiNPs treatment.			Shared rhythmic genes in ELGs among NC, SiNPs, SD+SiNPs treatments
						320202	Lefty2	Unique rhythmic genes in ELGs of SD+SiNPs treatment.			Shared rhythmic genes in ELGs among NC, SiNPs, SD+SiNPs treatments
						320292	Rasgef1b	Unique rhythmic genes in ELGs of SD+SiNPs treatment.			Shared rhythmic genes in ELGs among NC, SiNPs, SD+SiNPs treatments
						320302	Glt28d2	Unique rhythmic genes in ELGs of SD+SiNPs treatment.			Shared rhythmic genes in ELGs among NC, SiNPs, SD+SiNPs treatments
						320405	Cadps2	Unique rhythmic genes in ELGs of SD+SiNPs treatment.			Shared rhythmic genes in ELGs among NC, SiNPs, SD+SiNPs treatments
						320528	Vps13c	Unique rhythmic genes in ELGs of SD+SiNPs treatment.			Shared rhythmic genes in ELGs among NC, SiNPs, SD+SiNPs treatments
						320701	Tafa4	Unique rhythmic genes in ELGs of SD+SiNPs treatment.			Shared rhythmic genes in ELGs among NC, SiNPs, SD+SiNPs treatments
						320714	Trappc11	Unique rhythmic genes in ELGs of SD+SiNPs treatment.			Shared rhythmic genes in ELGs among NC, SiNPs, SD+SiNPs treatments
						320799	Zhx3	Unique rhythmic genes in ELGs of SD+SiNPs treatment.			Shared rhythmic genes in ELGs among NC, SiNPs, SD+SiNPs treatments
						320982	Arl4c	Unique rhythmic genes in ELGs of SD+SiNPs treatment.			Shared rhythmic genes in ELGs among NC, SiNPs, SD+SiNPs treatments
						327900	Ubtd2	Unique rhythmic genes in ELGs of SD+SiNPs treatment.			Shared rhythmic genes in ELGs among NC, SiNPs, SD+SiNPs treatments
						328035	Fads6	Unique rhythmic genes in ELGs of SD+SiNPs treatment.			Shared rhythmic genes in ELGs among NC, SiNPs, SD+SiNPs treatments
						328381	Sh2d4b	Unique rhythmic genes in ELGs of SD+SiNPs treatment.			Shared rhythmic genes in ELGs among NC, SiNPs, SD+SiNPs treatments
						329831	Fam166b	Unique rhythmic genes in ELGs of SD+SiNPs treatment.			Shared rhythmic genes in ELGs among NC, SiNPs, SD+SiNPs treatments
						330216	Mblac1	Unique rhythmic genes in ELGs of SD+SiNPs treatment.			Shared rhythmic genes in ELGs among NC, SiNPs, SD+SiNPs treatments
						330319	Wipf3	Unique rhythmic genes in ELGs of SD+SiNPs treatment.			Shared rhythmic genes in ELGs among NC, SiNPs, SD+SiNPs treatments
						330401	Tmcc1	Unique rhythmic genes in ELGs of SD+SiNPs treatment.			Shared rhythmic genes in ELGs among NC, SiNPs, SD+SiNPs treatments
						332175	Zdhhc23	Unique rhythmic genes in ELGs of SD+SiNPs treatment.			Shared rhythmic genes in ELGs among NC, SiNPs, SD+SiNPs treatments
						333424	A4gnt	Unique rhythmic genes in ELGs of SD+SiNPs treatment.			Shared rhythmic genes in ELGs among NC, SiNPs, SD+SiNPs treatments
						338349	Cntln	Unique rhythmic genes in ELGs of SD+SiNPs treatment.			Shared rhythmic genes in ELGs among NC, SiNPs, SD+SiNPs treatments
						338350	Acad12	Unique rhythmic genes in ELGs of SD+SiNPs treatment.			Shared rhythmic genes in ELGs among NC, SiNPs, SD+SiNPs treatments
						338364	Trim65	Unique rhythmic genes in ELGs of SD+SiNPs treatment.			Shared rhythmic genes in ELGs among NC, SiNPs, SD+SiNPs treatments
						338403	Cndp1	Unique rhythmic genes in ELGs of SD+SiNPs treatment.			Shared rhythmic genes in ELGs among NC, SiNPs, SD+SiNPs treatments
						347722	Agap1	Unique rhythmic genes in ELGs of SD+SiNPs treatment.			Shared rhythmic genes in ELGs among NC, SiNPs, SD+SiNPs treatments
						353130	Prss33	Unique rhythmic genes in ELGs of SD+SiNPs treatment.			Shared rhythmic genes in ELGs among NC, SiNPs, SD+SiNPs treatments
						378702	Serf2	Unique rhythmic genes in ELGs of SD+SiNPs treatment.			Shared rhythmic genes in ELGs among NC, SiNPs, SD+SiNPs treatments
						380712	Tlcd2	Unique rhythmic genes in ELGs of SD+SiNPs treatment.			Shared rhythmic genes in ELGs among NC, SiNPs, SD+SiNPs treatments
						380916	Lrch1	Unique rhythmic genes in ELGs of SD+SiNPs treatment.			Shared rhythmic genes in ELGs among NC, SiNPs, SD+SiNPs treatments
						381085	Tbc1d22b	Unique rhythmic genes in ELGs of SD+SiNPs treatment.			Shared rhythmic genes in ELGs among NC, SiNPs, SD+SiNPs treatments
						381110	Rmdn2	Unique rhythmic genes in ELGs of SD+SiNPs treatment.			Shared rhythmic genes in ELGs among NC, SiNPs, SD+SiNPs treatments
						381126	Garem1	Unique rhythmic genes in ELGs of SD+SiNPs treatment.			Shared rhythmic genes in ELGs among NC, SiNPs, SD+SiNPs treatments
						381305	Rc3h1	Unique rhythmic genes in ELGs of SD+SiNPs treatment.			Shared rhythmic genes in ELGs among NC, SiNPs, SD+SiNPs treatments
						381314	Iars2	Unique rhythmic genes in ELGs of SD+SiNPs treatment.			Shared rhythmic genes in ELGs among NC, SiNPs, SD+SiNPs treatments
						381530	Mup20	Unique rhythmic genes in ELGs of SD+SiNPs treatment.			Shared rhythmic genes in ELGs among NC, SiNPs, SD+SiNPs treatments
						381802	Tsen2	Unique rhythmic genes in ELGs of SD+SiNPs treatment.			Shared rhythmic genes in ELGs among NC, SiNPs, SD+SiNPs treatments
						382018	Unc13a	Unique rhythmic genes in ELGs of SD+SiNPs treatment.			Shared rhythmic genes in ELGs among NC, SiNPs, SD+SiNPs treatments
						382406	Poc1b	Unique rhythmic genes in ELGs of SD+SiNPs treatment.			Shared rhythmic genes in ELGs among NC, SiNPs, SD+SiNPs treatments
						382639	Zbtb42	Unique rhythmic genes in ELGs of SD+SiNPs treatment.			Shared rhythmic genes in ELGs among NC, SiNPs, SD+SiNPs treatments
						383435	Ms4a14	Unique rhythmic genes in ELGs of SD+SiNPs treatment.			Shared rhythmic genes in ELGs among NC, SiNPs, SD+SiNPs treatments
						384009	Glipr2	Unique rhythmic genes in ELGs of SD+SiNPs treatment.			Shared rhythmic genes in ELGs among NC, SiNPs, SD+SiNPs treatments
						387524	Znrf2	Unique rhythmic genes in ELGs of SD+SiNPs treatment.			Shared rhythmic genes in ELGs among NC, SiNPs, SD+SiNPs treatments
						399603	Lratd2	Unique rhythmic genes in ELGs of SD+SiNPs treatment.			Shared rhythmic genes in ELGs among NC, SiNPs, SD+SiNPs treatments
						403174	Msantd1	Unique rhythmic genes in ELGs of SD+SiNPs treatment.			Shared rhythmic genes in ELGs among NC, SiNPs, SD+SiNPs treatments
						407789	BC048644	Unique rhythmic genes in ELGs of SD+SiNPs treatment.			Shared rhythmic genes in ELGs among NC, SiNPs, SD+SiNPs treatments
						407795	Smim31	Unique rhythmic genes in ELGs of SD+SiNPs treatment.			Shared rhythmic genes in ELGs among NC, SiNPs, SD+SiNPs treatments
						414872	Zyg11b	Unique rhythmic genes in ELGs of SD+SiNPs treatment.			Shared rhythmic genes in ELGs among NC, SiNPs, SD+SiNPs treatments
						432486	Gnptab	Unique rhythmic genes in ELGs of SD+SiNPs treatment.			Shared rhythmic genes in ELGs among NC, SiNPs, SD+SiNPs treatments
						433375	Creg1	Unique rhythmic genes in ELGs of SD+SiNPs treatment.			Shared rhythmic genes in ELGs among NC, SiNPs, SD+SiNPs treatments
						433931	Pigg	Unique rhythmic genes in ELGs of SD+SiNPs treatment.			Shared rhythmic genes in ELGs among NC, SiNPs, SD+SiNPs treatments
						436022	Dnaaf3	Unique rhythmic genes in ELGs of SD+SiNPs treatment.			Shared rhythmic genes in ELGs among NC, SiNPs, SD+SiNPs treatments
						445007	Nup85	Unique rhythmic genes in ELGs of SD+SiNPs treatment.			Shared rhythmic genes in ELGs among NC, SiNPs, SD+SiNPs treatments
						503550	Klri1	Unique rhythmic genes in ELGs of SD+SiNPs treatment.			Shared rhythmic genes in ELGs among NC, SiNPs, SD+SiNPs treatments
						544696	Tbc1d32	Unique rhythmic genes in ELGs of SD+SiNPs treatment.			Shared rhythmic genes in ELGs among NC, SiNPs, SD+SiNPs treatments
						545030	Wdfy4	Unique rhythmic genes in ELGs of SD+SiNPs treatment.			Shared rhythmic genes in ELGs among NC, SiNPs, SD+SiNPs treatments
						545622	Ptpn3	Unique rhythmic genes in ELGs of SD+SiNPs treatment.			Shared rhythmic genes in ELGs among NC, SiNPs, SD+SiNPs treatments
						546335	Gm5938	Unique rhythmic genes in ELGs of SD+SiNPs treatment.			Shared rhythmic genes in ELGs among NC, SiNPs, SD+SiNPs treatments
						574437	Xlr3b	Unique rhythmic genes in ELGs of SD+SiNPs treatment.			Shared rhythmic genes in ELGs among NC, SiNPs, SD+SiNPs treatments
						620235	Siglec15	Unique rhythmic genes in ELGs of SD+SiNPs treatment.			Shared rhythmic genes in ELGs among NC, SiNPs, SD+SiNPs treatments
						621976	Tmem170b	Unique rhythmic genes in ELGs of SD+SiNPs treatment.			Shared rhythmic genes in ELGs among NC, SiNPs, SD+SiNPs treatments
						622434	Arhgef26	Unique rhythmic genes in ELGs of SD+SiNPs treatment.			Shared rhythmic genes in ELGs among NC, SiNPs, SD+SiNPs treatments
						625360	BC147527	Unique rhythmic genes in ELGs of SD+SiNPs treatment.			Shared rhythmic genes in ELGs among NC, SiNPs, SD+SiNPs treatments
						628308	Zfp970	Unique rhythmic genes in ELGs of SD+SiNPs treatment.			Shared rhythmic genes in ELGs among NC, SiNPs, SD+SiNPs treatments
						635702	Naaladl2	Unique rhythmic genes in ELGs of SD+SiNPs treatment.			Shared rhythmic genes in ELGs among NC, SiNPs, SD+SiNPs treatments
						652925	Tmem243	Unique rhythmic genes in ELGs of SD+SiNPs treatment.			Shared rhythmic genes in ELGs among NC, SiNPs, SD+SiNPs treatments
						665113	Tnik	Unique rhythmic genes in ELGs of SD+SiNPs treatment.			Shared rhythmic genes in ELGs among NC, SiNPs, SD+SiNPs treatments
						665574	Gm7694	Unique rhythmic genes in ELGs of SD+SiNPs treatment.			Shared rhythmic genes in ELGs among NC, SiNPs, SD+SiNPs treatments
						666311	Zscan25	Unique rhythmic genes in ELGs of SD+SiNPs treatment.			Shared rhythmic genes in ELGs among NC, SiNPs, SD+SiNPs treatments
						666907	Ms4a4a	Unique rhythmic genes in ELGs of SD+SiNPs treatment.			Shared rhythmic genes in ELGs among NC, SiNPs, SD+SiNPs treatments
						666914	Gm8359	Unique rhythmic genes in ELGs of SD+SiNPs treatment.			Shared rhythmic genes in ELGs among NC, SiNPs, SD+SiNPs treatments
						666921	Gm12886	Unique rhythmic genes in ELGs of SD+SiNPs treatment.			Shared rhythmic genes in ELGs among NC, SiNPs, SD+SiNPs treatments
						667278	Mup-ps16	Unique rhythmic genes in ELGs of SD+SiNPs treatment.			Shared rhythmic genes in ELGs among NC, SiNPs, SD+SiNPs treatments
						100040462	Mndal	Unique rhythmic genes in ELGs of SD+SiNPs treatment.			Shared rhythmic genes in ELGs among NC, SiNPs, SD+SiNPs treatments
						100041658	Mup7	Unique rhythmic genes in ELGs of SD+SiNPs treatment.			Shared rhythmic genes in ELGs among NC, SiNPs, SD+SiNPs treatments
						100041903	LOC100041903	Unique rhythmic genes in ELGs of SD+SiNPs treatment.			Shared rhythmic genes in ELGs among NC, SiNPs, SD+SiNPs treatments
						100101806	Srp54c	Unique rhythmic genes in ELGs of SD+SiNPs treatment.			Shared rhythmic genes in ELGs among NC, SiNPs, SD+SiNPs treatments
						100126824	Sco2	Unique rhythmic genes in ELGs of SD+SiNPs treatment.			Shared rhythmic genes in ELGs among NC, SiNPs, SD+SiNPs treatments
						101055663	LOC101055663	Unique rhythmic genes in ELGs of SD+SiNPs treatment.			Shared rhythmic genes in ELGs among NC, SiNPs, SD+SiNPs treatments
						101055671	Lipo2	Unique rhythmic genes in ELGs of SD+SiNPs treatment.			Shared rhythmic genes in ELGs among NC, SiNPs, SD+SiNPs treatments
						102443351	Xntrpc	Unique rhythmic genes in ELGs of SD+SiNPs treatment.			Shared rhythmic genes in ELGs among NC, SiNPs, SD+SiNPs treatments
						102631717	Gm29986	Unique rhythmic genes in ELGs of SD+SiNPs treatment.			Shared rhythmic genes in ELGs among NC, SiNPs, SD+SiNPs treatments
						105245011	Gm40525	Unique rhythmic genes in ELGs of SD+SiNPs treatment.			Shared rhythmic genes in ELGs among NC, SiNPs, SD+SiNPs treatments
						108167387	LOC108167387	Unique rhythmic genes in ELGs of SD+SiNPs treatment.			Shared rhythmic genes in ELGs among NC, SiNPs, SD+SiNPs treatments
						108168775	Gm46752	Unique rhythmic genes in ELGs of SD+SiNPs treatment.			Shared rhythmic genes in ELGs among NC, SiNPs, SD+SiNPs treatments
						115487094	LOC115487094	Unique rhythmic genes in ELGs of SD+SiNPs treatment.			Shared rhythmic genes in ELGs among NC, SiNPs, SD+SiNPs treatments
						115488536	LOC115488536	Unique rhythmic genes in ELGs of SD+SiNPs treatment.			Shared rhythmic genes in ELGs among NC, SiNPs, SD+SiNPs treatments
						115489096	LOC115489096	Unique rhythmic genes in ELGs of SD+SiNPs treatment.			Shared rhythmic genes in ELGs among NC, SiNPs, SD+SiNPs treatments
						115489122	LOC115489122	Unique rhythmic genes in ELGs of SD+SiNPs treatment.			Shared rhythmic genes in ELGs among NC, SiNPs, SD+SiNPs treatments
						115489126	LOC115489126	Unique rhythmic genes in ELGs of SD+SiNPs treatment.			Shared rhythmic genes in ELGs among NC, SiNPs, SD+SiNPs treatments
						115489720	LOC115489720	Unique rhythmic genes in ELGs of SD+SiNPs treatment.			Shared rhythmic genes in ELGs among NC, SiNPs, SD+SiNPs treatments
						115489902	LOC115489902	Unique rhythmic genes in ELGs of SD+SiNPs treatment.			Shared rhythmic genes in ELGs among NC, SiNPs, SD+SiNPs treatments
						115490131	Tmem271	Unique rhythmic genes in ELGs of SD+SiNPs treatment.			Shared rhythmic genes in ELGs among NC, SiNPs, SD+SiNPs treatments
						115490151	LOC115490151	Unique rhythmic genes in ELGs of SD+SiNPs treatment.			Shared rhythmic genes in ELGs among NC, SiNPs, SD+SiNPs treatments
