# Supplementary material for: Sleep Deprivation Potentiates Silica Nanoparticle-Induced Circadian Disruption and Lacrimal Gland Dysfunction in Mice
Source: Research Square preprint supplement (doi:10.21203/rs.3.rs-6562058/v1), 2025-05-09
Supplement: Supplementary file 17 [file d5cab2e40d599615776919a9.xlsx]

## Sheet: Sheet1
Table S1. Top 10 DEGs in ELGs between SD+SiNPs and NC, including gene names, fold changes, and statistical significance values.
GeneID	Gene Name	log2FC	p_val	p_val_adj	ZT time	Mark
1	Hist1h4m	6.6792	1.73e-06	0.000321	0	adjust P-val<0.01
2	LOC115489888	-6.48705	2.87e-06	0.000475	0	adjust P-val<0.01
3	Amy1	-7.43095	1.45e-05	0.00155858	0	adjust P-val<0.01
4	Cd5l	-5.58824	0.000103	0.00732838	0	adjust P-val<0.01
5	Myh6	-7.01856	0.0411145	0.385036	0	adjust P-val>=0.01
6	Bpifa2	-10.4565	9.9e-07	0.000203	0	adjust P-val<0.01
7	Smr3a	-7.62178	0.000254	0.0144596	0	adjust P-val>=0.01
8	Inafm1	6.93668	1.53e-07	4.62e-05	0	adjust P-val<0.01
9	Lypd2	5.10294	0.171125	0.735164	0	adjust P-val>=0.01
10	Chia1	-10.0538	0.000256	0.014534	0	adjust P-val>=0.01
11	Mup10	-8.32366	0.0331969	0.998716	3	adjust P-val>=0.01
12	Ccl27b	5.56344	0.139376	0.998716	3	adjust P-val>=0.01
13	H2-Q9	-6.37983	0.103013	0.998716	3	adjust P-val>=0.01
14	Crisp1	-5.48655	7.66e-05	0.0198272	3	adjust P-val>=0.01
15	Amy1	-10.2647	1.1e-08	1.71e-05	3	adjust P-val<0.01
16	Bpifa2	-14.118	6.13e-10	1.31e-06	3	adjust P-val<0.01
17	Smr3a	-12.0187	2.17e-08	2.64e-05	3	adjust P-val<0.01
18	Zfp781	6.94248	0.0758348	0.998716	3	adjust P-val>=0.01
19	Tesc	-5.65922	0.000344	0.0699193	3	adjust P-val>=0.01
20	Chia1	-11.8157	1.5e-08	1.97e-05	3	adjust P-val<0.01
21	Ccl27b	-5.36503	0.15437	0.997335	6	adjust P-val>=0.01
22	Cd300ld5	-5.36089	0.169845	0.997335	6	adjust P-val>=0.01
23	Gm32204	4.243	0.026176	0.647644	6	adjust P-val>=0.01
24	LOC102635992	-7.69493	0.0489979	0.823191	6	adjust P-val>=0.01
25	H2-Q9	4.35631	0.144156	0.997335	6	adjust P-val>=0.01
26	LOC115489100	-4.36112	0.0392587	0.766782	6	adjust P-val>=0.01
27	Rims2	6.10247	1.91e-05	0.00487077	6	adjust P-val<0.01
28	H2ac7	-4.49057	0.0281956	0.677131	6	adjust P-val>=0.01
29	Cfap47	-4.766	0.00435739	0.265891	6	adjust P-val>=0.01
30	Gvin1	21.252	5.43e-08	3.86e-05	6	adjust P-val<0.01
31	Amy1	10.3077	5.41e-169	9.24e-165	9	adjust P-val<0.01
32	Bpifa2	11.2981	1.93e-53	2.76e-50	9	adjust P-val<0.01
33	Smr3a	11.2338	3.63e-140	3.1e-136	9	adjust P-val<0.01
34	Scgb2b15	-5.79442	2.37e-72	1.01e-68	9	adjust P-val<0.01
35	Scgb2b10	-7.59247	3.73e-45	3.75e-42	9	adjust P-val<0.01
36	Scgb2b30	-8.41328	2.26e-64	4.87e-61	9	adjust P-val<0.01
37	Scgb2b12	-9.16631	1.14e-68	3.24e-65	9	adjust P-val<0.01
38	Scgb2b33	-8.41335	2.28e-64	4.87e-61	9	adjust P-val<0.01
39	Scgb2b17	-5.79444	2.37e-72	1.01e-68	9	adjust P-val<0.01
40	Chia1	10.7541	3.66e-69	1.25e-65	9	adjust P-val<0.01
41	Eif3j2	-5.54779	0.156597	0.998842	12	adjust P-val>=0.01
42	Esp5	-5.33324	0.1573	0.998842	12	adjust P-val>=0.01
43	Gm17330	-5.08447	0.173558	0.998842	12	adjust P-val>=0.01
44	LOC108167347	-4.64647	0.0954393	0.998842	12	adjust P-val>=0.01
45	Amy1	8.37984	7.28e-05	0.0179666	12	adjust P-val>=0.01
46	Bpifa2	12.4439	1.36e-06	0.00089	12	adjust P-val<0.01
47	Smr3a	10.7508	1.4e-05	0.00554435	12	adjust P-val<0.01
48	Moap1	6.97875	0.074355	0.983068	12	adjust P-val>=0.01
49	Hist1h2bq	7.57492	0.052677	0.895246	12	adjust P-val>=0.01
50	Chia1	10.4808	0.000603	0.0847331	12	adjust P-val>=0.01
51	Cd300ld5	5.16011	0.000211	0.0202153	15	adjust P-val>=0.01
52	LOC115490184	4.76224	0.225289	0.926532	15	adjust P-val>=0.01
53	Amy1	-9.66099	2.46e-05	0.0038574	15	adjust P-val<0.01
54	Bpifa2	-11.6497	6.83e-06	0.00144161	15	adjust P-val<0.01
55	Smr3a	-10.5884	4.94e-05	0.00660782	15	adjust P-val<0.01
56	Scgb2b10	-6.4475	1.76e-17	1.88e-14	15	adjust P-val<0.01
57	Scgb2b30	-6.63909	1.07e-13	8.72e-11	15	adjust P-val<0.01
58	Scgb2b12	-8.20787	1.56e-76	1.34e-72	15	adjust P-val<0.01
59	Scgb2b33	-6.63909	1.07e-13	8.72e-11	15	adjust P-val<0.01
60	Chia1	-11.7288	0.000125	0.0134991	15	adjust P-val>=0.01
61	Gm32204	4.07206	0.0365083	0.40814	18	adjust P-val>=0.01
62	Gm40595	-4.79303	0.177487	0.853092	18	adjust P-val>=0.01
63	Gm45935	6.82604	0.00338603	0.0947587	18	adjust P-val>=0.01
64	LOC108167347	5.12308	0.166506	0.830091	18	adjust P-val>=0.01
65	LOC115487414	-4.38298	0.017249	0.260187	18	adjust P-val>=0.01
66	LOC115489100	4.25853	0.0339889	0.393929	18	adjust P-val>=0.01
67	Rims2	-4.13148	0.0279853	0.351937	18	adjust P-val>=0.01
68	Capn11	4.97872	0.00258409	0.0775456	18	adjust P-val>=0.01
69	Scgb2b10	-4.68978	1.12e-05	0.00145028	18	adjust P-val<0.01
70	Nptxr	-5.18358	0.186004	0.871931	18	adjust P-val>=0.01
71	Mup10	-6.68696	0.0873214	0.999753	21	adjust P-val>=0.01
72	Ccl27b	-4.22079	0.282968	0.999753	21	adjust P-val>=0.01
73	Hist1h4m	6.06564	0.110024	0.999753	21	adjust P-val>=0.01
74	Amy2a3	-5.0677	0.16588	0.999753	21	adjust P-val>=0.01
75	Gm27021	3.98816	0.0554719	0.999753	21	adjust P-val>=0.01
76	Gm46353	5.66736	0.000106	0.0411015	21	adjust P-val>=0.01
77	Serpina3c	3.91183	0.054739	0.999753	21	adjust P-val>=0.01
78	Lgi1	4.63672	0.00614693	0.654362	21	adjust P-val>=0.01
79	Ackr2	3.94349	0.0141686	0.999753	21	adjust P-val>=0.01
80	Nptxr	4.76826	0.168364	0.999753	21	adjust P-val>=0.01
