# Supplementary material for: Sleep Deprivation Potentiates Silica Nanoparticle-Induced Circadian Disruption and Lacrimal Gland Dysfunction in Mice
Source: Research Square preprint supplement (doi:10.21203/rs.3.rs-6562058/v1), 2025-05-09
Supplement: Supplementary file 18 [file e5c90de6665a3693686c7f7b.xlsx]

## Sheet: Sheet1
Table S15 Immune-related transcripts in the NC and SiNPs-treated ELGs.
SiNPs-treated/NC		SD+SiNPs-treated/NC
Gene Symbol	Remarks	Gene Symbol	Remarks
'Tnfrsf17'	up-regulated	'Tnfrsf17'	up-regulated
'Ms4a2'	up-regulated	'Ms4a2'	up-regulated
'Vpreb2'	up-regulated	'Prg2'	up-regulated
'S100a8'	up-regulated	'Pla2g5'	up-regulated
'Cxcl13'	up-regulated	'Jchain'	up-regulated
'Ffar2'	up-regulated	'Ptprh'	up-regulated
'Ctse'	up-regulated	'Ptk6'	up-regulated
'S100a9'	up-regulated	'Krt16'	up-regulated
'Tnfsf11'	up-regulated	'Nr1h4'	up-regulated
'Themis'	up-regulated	'Sarm1'	up-regulated
'Cxcr5'	up-regulated	'Sucnr1'	up-regulated
'Cd19'	up-regulated	'Aqp11'	up-regulated
'Pla2g5'	up-regulated	'Tnfsf11'	up-regulated
'Ptprh'	up-regulated	'Ifng'	up-regulated
'Uchl1'	up-regulated	'Fcer1a'	up-regulated
'Prg2'	up-regulated	'Scnn1b'	up-regulated
'Acod1'	up-regulated	'Ctse'	up-regulated
'Ccr6'	up-regulated	'Padi4'	up-regulated
'Fcer1a'	up-regulated	'Cd79b'	up-regulated
'Gm12250'	up-regulated	'Cts8'	up-regulated
'Tnfrsf13c'	up-regulated	'1810046K07Rik'	up-regulated
'Ptk6'	up-regulated	'Kcnj8'	up-regulated
'Sit1'	up-regulated	'Arg1'	up-regulated
'Jchain'	up-regulated	'Tnfrsf13c'	up-regulated
'Cd79a'	up-regulated	'Spon2'	up-regulated
'Cd79b'	up-regulated	'Uchl1'	up-regulated
'Sarm1'	up-regulated	'Cd79a'	up-regulated
'Slc46a2'	up-regulated	'Cd19'	up-regulated
'Tgtp1'	up-regulated	'Hsd11b1'	up-regulated
'Il17c'	up-regulated	'Slc46a2'	up-regulated
'Cd209b'	up-regulated	'Txk'	up-regulated
'Usp29'	up-regulated	'Cxcl13'	up-regulated
'Igtp'	up-regulated	'Gpr18'	up-regulated
'Dnase1l3'	up-regulated	'Camp'	up-regulated
'Pilrb1'	up-regulated	'Nlrp12'	up-regulated
'Serpina3g'	up-regulated	'Zp3'	up-regulated
'Aqp11'	up-regulated	'Wfdc13'	up-regulated
'Ifng'	up-regulated	'Bpifb1'	up-regulated
'Itk'	up-regulated	'Mpl'	up-regulated
'Fpr2'	up-regulated	'Armh4'	up-regulated
'Treml4'	up-regulated	'Lrrc19'	up-regulated
'Treml2'	up-regulated	'Klrg1'	up-regulated
'Klre1'	up-regulated	'Themis'	up-regulated
'Cst7'	up-regulated	'Il23a'	up-regulated
'Gbp2'	up-regulated	'Gsn'	up-regulated
'Iigp1'	up-regulated	'Cd209b'	up-regulated
'Ifi214'	up-regulated	'Cd28'	up-regulated
'Cd300e'	up-regulated	'Tril'	up-regulated
'Trem1'	up-regulated	'Irf4'	up-regulated
'1810046K07Rik'	up-regulated	'Treml4'	up-regulated
'Fpr1'	up-regulated	'Lta'	up-regulated
'Hsd11b1'	up-regulated	'C1s2'	up-regulated
'Fcmr'	up-regulated	'Serpina3g'	up-regulated
'Zbp1'	up-regulated	'Crp'	up-regulated
'Sh2d2a'	up-regulated	'Vpreb2'	up-regulated
'Ptgdr2'	up-regulated	'Il17c'	up-regulated
'Padi4'	up-regulated	'Mill1'	up-regulated
'Txk'	up-regulated	'Ffar2'	up-regulated
'Ccr4'	up-regulated	'Ifi214'	up-regulated
'Cd3e'	up-regulated	'Cxcr3'	up-regulated
'Tnfsf18'	up-regulated	'Cd247'	up-regulated
'Gimap3'	up-regulated	'Traf3ip3'	up-regulated
'Cd4'	up-regulated	'Grhl3'	up-regulated
'H2-Q7'	up-regulated	'Sh2b2'	up-regulated
'C1s2'	up-regulated	'Bmx'	up-regulated
'Cd96'	up-regulated	'Gimap3'	up-regulated
'Fasl'	up-regulated	'Il1f5'	up-regulated
'Slc15a1'	up-regulated	'Aire'	up-regulated
'Crtam'	up-regulated	'Bcl6'	up-regulated
'Bmx'	up-regulated	'Cd3e'	up-regulated
'Xcl1'	up-regulated	'Xcl1'	up-regulated
'Lrrc19'	up-regulated	'Sit1'	up-regulated
'Cxcl9'	up-regulated	'Lck'	up-regulated
'Stat4'	up-regulated	'Usp29'	up-regulated
'C1ql3'	up-regulated	'Trim43a'	up-regulated
'Zap70'	up-regulated	'Ifi27l2b'	up-regulated
'Prf1'	up-regulated	'Rnf182'	up-regulated
'Cd28'	up-regulated	'Il21'	up-regulated
'Lag3'	up-regulated	'Trem1'	up-regulated
'Sh2b2'	up-regulated	'C1rb'	up-regulated
'Cxcr3'	up-regulated	'Ggt5'	up-regulated
'Lta'	up-regulated	'Chia1'	down-regulated
'Traf3ip3'	up-regulated	'Pf4'	down-regulated
'Fut7'	up-regulated	'Spn'	down-regulated
'Arg1'	up-regulated	'Tnfrsf13b'	down-regulated
'Rnf182'	up-regulated	'Gbp5'	down-regulated
'Sucnr1'	up-regulated	'Endou'	down-regulated
'Nlrp12'	up-regulated	'Cd4'	down-regulated
'Mill1'	up-regulated	'Ly9'	down-regulated
'Mpl'	up-regulated	'C1ql3'	down-regulated
'Ifnb1'	up-regulated	'Cd300e'	down-regulated
'Kcnj8'	up-regulated	'Crtam'	down-regulated
'Ggt5'	up-regulated	'Cxcr5'	down-regulated
'Slamf6'	up-regulated	'Lat'	down-regulated
'Gpr18'	up-regulated	'Slamf6'	down-regulated
'Gpr65'	up-regulated	'Trim38'	down-regulated
'Spn'	up-regulated	'Tnfsf4'	down-regulated
'Il2rb'	up-regulated	'Ido1'	down-regulated
'Gbp5'	up-regulated	'Ltb'	down-regulated
'Tlr9'	up-regulated	'Itk'	down-regulated
'Eomes'	up-regulated	'Gapt'	down-regulated
'Gbp3'	up-regulated	'Trim6'	down-regulated
'Irf4'	up-regulated	'Il23r'	down-regulated
'Il4i1'	up-regulated	'Bdh2'	down-regulated
'Gp2'	up-regulated	'Iigp1'	down-regulated
'Ly9'	up-regulated	'H2-Q7'	down-regulated
'Spon2'	up-regulated	'March1'	down-regulated
'Itgb8'	up-regulated	'Lgals9'	down-regulated
'Klrg1'	up-regulated	'Ccr6'	down-regulated
'Pdcd1'	up-regulated	'Tlr9'	down-regulated
'Fcgr4'	up-regulated	'Dock2'	down-regulated
'Pglyrp4'	up-regulated	'Zap70'	down-regulated
'Cd247'	up-regulated	'Cd3g'	down-regulated
'Nr1h4'	up-regulated	'Sh2d2a'	down-regulated
'Gsn'	up-regulated	'Fut7'	down-regulated
'Lck'	up-regulated	'Klre1'	down-regulated
'Lgals9'	up-regulated	'Cd96'	down-regulated
'Klrk1'	up-regulated	'Igtp'	down-regulated
'Lat'	up-regulated	'Prf1'	down-regulated
'March1'	up-regulated	'Cxcl9'	down-regulated
'Tlr12'	up-regulated	'Fpr1'	down-regulated
'Wdfy4'	up-regulated	'Crlf1'	down-regulated
'Psmb8'	up-regulated	'Cfi'	down-regulated
'Pf4'	up-regulated	'Tcim'	down-regulated
'Aire'	up-regulated	'Ifnlr1'	down-regulated
'Oasl2'	up-regulated	'Zbp1'	down-regulated
'Dock2'	up-regulated	'Gpr65'	down-regulated
'Armh4'	up-regulated	'Slc15a1'	down-regulated
'Tril'	up-regulated	'Gp2'	down-regulated
'Ltb'	up-regulated	'Il4i1'	down-regulated
'Gapt'	up-regulated	'Ccr4'	down-regulated
'Cd3g'	up-regulated	'Vtcn1'	down-regulated
'Irgm1'	up-regulated	'S100a8'	down-regulated
'Tnfrsf13b'	up-regulated	'Oas1d'	down-regulated
'Blk'	down-regulated	'Tlr12'	down-regulated
'Cts8'	down-regulated	'Klrk1'	down-regulated
'Ifi27l2b'	down-regulated	'Pla2g2f'	down-regulated
'Trim38'	down-regulated	'F2'	down-regulated
'Krt16'	down-regulated	'Fcgr4'	down-regulated
'Pla2g10'	down-regulated	'Itgb8'	down-regulated
'Crp'	down-regulated	'Tgtp1'	down-regulated
'Il21'	down-regulated	'Vpreb1'	down-regulated
'Tnfsf4'	down-regulated	'Il2rb'	down-regulated
'Camp'	down-regulated	'Wfdc12'	down-regulated
'C1rb'	down-regulated	'Gbp3'	down-regulated
'Oas1d'	down-regulated	'Traip'	down-regulated
'Wfdc13'	down-regulated	'Irgm1'	down-regulated
'Ido1'	down-regulated	'Cst7'	down-regulated
'Bpifb1'	down-regulated	'Stat4'	down-regulated
'Osm'	down-regulated	'Eomes'	down-regulated
'Il23a'	down-regulated	'Psmb8'	down-regulated
'Ido2'	down-regulated	'Gm12250'	down-regulated
'Traip'	down-regulated	'Mylpf'	down-regulated
'Clec4d'	down-regulated	'Wdfy4'	down-regulated
'Trim59'	down-regulated	'Apoa2'	down-regulated
'4930486L24Rik'	down-regulated	'Il6'	down-regulated
'Mylpf'	down-regulated	'Trim55'	down-regulated
'Nlrp3'	down-regulated	'Treml1'	down-regulated
'Tcim'	down-regulated	'Pla2g10'	down-regulated
'Ifnlr1'	down-regulated	'S100a9'	down-regulated
'Pik3ap1'	down-regulated	'Ereg'	down-regulated
'Il1rn'	down-regulated	'Oasl2'	down-regulated
'Cd5l'	down-regulated	'Gbp2'	down-regulated
'Bcl6'	down-regulated	'Ptgdr2'	down-regulated
'Crlf1'	down-regulated	'Fcmr'	down-regulated
'Ccl17'	down-regulated	'Apoa1'	down-regulated
'Ccl2'	down-regulated	'Olr1'	down-regulated
'Endou'	down-regulated	'Treml2'	down-regulated
'Lif'	down-regulated	'4930486L24Rik'	down-regulated
'Clec4e'	down-regulated	'Fasl'	down-regulated
'Trim55'	down-regulated	'Dnase1l3'	down-regulated
'Trim43a'	down-regulated	'Pik3ap1'	down-regulated
'Zp3'	down-regulated	'Pilrb1'	down-regulated
'F2'	down-regulated	'Nlrp3'	down-regulated
'Apoa2'	down-regulated	'Acod1'	down-regulated
'Il1f5'	down-regulated	'Trim59'	down-regulated
'Il23r'	down-regulated	'Tnfsf18'	down-regulated
'Trim6'	down-regulated	'Pdcd1'	down-regulated
'Grhl3'	down-regulated	'Ccl17'	down-regulated
'Dcstamp'	down-regulated	'Fpr2'	down-regulated
'Olr1'	down-regulated	'Adm'	down-regulated
'Clnk'	down-regulated	'Lag3'	down-regulated
'Bcl3'	down-regulated	'Ccl21a'	down-regulated
'Wfdc12'	down-regulated	'Cxcl5'	down-regulated
'Adm'	down-regulated	'Clec4d'	down-regulated
'Il6'	down-regulated	'Dcstamp'	down-regulated
'Vpreb1'	down-regulated	'Osm'	down-regulated
'Apoa1'	down-regulated	'Ccl2'	down-regulated
'Hsd11b2'	down-regulated	'Ido2'	down-regulated
'Pilrb2'	down-regulated	'Pilrb2'	down-regulated
'Cfi'	down-regulated	'Bcl3'	down-regulated
'Treml1'	down-regulated	'Tnfsf15'	down-regulated
'Vtcn1'	down-regulated	'Csf3'	down-regulated
'Ereg'	down-regulated	'Blk'	down-regulated
'Csf3'	down-regulated	'Clnk'	down-regulated
'Pla2g2f'	down-regulated	'Clec4e'	down-regulated
'Tnfsf15'	down-regulated	'Il1rn'	down-regulated
'Scnn1b'	down-regulated	'Pglyrp4'	down-regulated
'Cxcl5'	down-regulated	'Lif'	down-regulated
'Bdh2'	down-regulated	'Hsd11b2'	down-regulated
'Ccl21a'	down-regulated	'Cd5l'	down-regulated
'Il4i1b'	down-regulated	'Il4i1b'	down-regulated
'Chia1'	down-regulated	'Ifnb1'	down-regulated
